# Supplementary material for: Genetic Regulation of Cytokine Response in Patients with Acute Community-Acquired Pneumonia
Source: Genes (Basel). 2022 Jan 6;13(1):111. doi: 10.3390/genes13010111 (PMC8774373; doi:10.3390/genes13010111)
Supplement: Supplementary file 1 [file genes-13-00111-s001.zip › supplementary_table_s1_20211127.xlsx]

## Sheet: Sample Size
Cytokine	Sample Size
IL_1B	361
IL_6	386
IL_8	382
IL_10	387
IL_12	384
MCP_1_MCAF	388
MIP_1A	369
VEGF	388
VCAM_1	389
ICAM_1	389
