# Supplementary material for: Genetic Regulation of Cytokine Response in Patients with Acute Community-Acquired Pneumonia
Source: Genes (Basel). 2022 Jan 6;13(1):111. doi: 10.3390/genes13010111 (PMC8774373; doi:10.3390/genes13010111)
Supplement: Supplementary file 1 [file genes-13-00111-s001.zip › supplementary_table_s2_20211127.xlsx]

## Sheet: Genomic Inflation Factor
Cytokine	Genomic Inflation Factor
IL_1B	1.00471
IL_6	1.00757
IL_8	1.00642
IL_10	1.00167
IL_12	1.0005
MCP_1_MCAF	0.992759
MIP_1A	1.00544
VEGF	1.00354
VCAM_1	1.00016
ICAM_1	1.01282
