# Supplementary material for: Genetic Regulation of Cytokine Response in Patients with Acute Community-Acquired Pneumonia
Source: Genes (Basel). 2022 Jan 6;13(1):111. doi: 10.3390/genes13010111 (PMC8774373; doi:10.3390/genes13010111)
Supplement: Supplementary file 1 [file genes-13-00111-s001.zip › supplementary_table_s3_20211127.xlsx]

## Sheet: GWAS
SNP	duplicated_position	invalidAssoc	chromosome of SNP	Cytoband	chromosome chunk of SNP	position of SNP	tagSNP	r2 SNP-tagSNP	is tagSNP	nearest genes (functional relevance)	biotype (validation) nearest genes	nearest gene	Eigen	EigenPC	CADD	DANN	GWAVA Region	GWAVA TSS	GWAVA Unmatched	regulome score	regulome score numeric	regulome details	corelating GWAS	cis-eQTL genes	trans-eQTL genes	genes for coremine-search	hgnc pathwaygenes	entrez pathwaygenes	KEGG pathway	Reactome pathway	DOSE pathway	GO pathway	Tissue enrichment	top phenotype	top log-p prim. statistic	top log-p sec. statistic	explained variance SNP	strand	counted allele	other allele	topmaf	topeaf	topn	topinfo	topimputation_type	notin_infofile	beta_prim_ICAM_1	beta_prim_IL_10	beta_prim_IL_12
rs115828587:47084354:A:C	FALSE		1	1p33	a10	47084354	rs115828587:47084354:A:C	1	TRUE	MOB3C (1.8 kb, near_gene/Upstream gene/MODIFIER); MKNK1 (1.8 kb, near_gene/Upstream gene/MODIFIER); ATPAF1 (14 kb); EFCAB14 (40 kb); MKNK1-AS1 (48 kb)	MOB3C:protein_coding(KNOWN); MKNK1:protein_coding(KNOWN); ATPAF1:protein_coding(KNOWN); EFCAB14:protein_coding(KNOWN); MKNK1-AS1:antisense(KNOWN)	MOB3C: MOB kinase activator 3C (1.8 kb)	-0.0514112	-0.138687	0.839	0.63934	0.32	0.38	0.53	4	4		NA	ATPAF1 | EFCAB14 | FAAH | GPBP1L1 | IPP | KIAA0494 | LINC00505 | LURAP1 | MKNK1 | MOB3C | MUTYH | NSUN4 | PIK3R3 | POMGNT1 | RAD54L | RP5-1109J22.1 | TSPAN1 | UQCRH | UROD		ATPAF1 CYP4B1 CYP4Z2P DMBX1 EFCAB14 EFCAB14-AS1 FAAH GPBP1L1 IPP KIAA0494 KNCN LINC00505 LURAP1 MKNK1 MKNK1-AS1 MOB3C MUTYH NSUN4 PIK3R3 POMGNT1 RAD54L RP5-1109J22.1 TEX38 TSPAN1 UQCRH UROD	ATPAF1, EFCAB14, GPBP1L1, KIAA0494, MKNK1, MKNK1-AS1, MOB3C, NSUN4	100507423, 148932, 387338, 60313, 64756, 8569, 9813		Signaling by Receptor Tyrosine Kinases:MKNK1		ribonucleoprotein complex subunit organization:NSUN4 | RNA modification:NSUN4 | regulation of translation:MKNK1,NSUN4 | regulation of cellular amide metabolic process:MKNK1,NSUN4		MCP_1_MCAF	6.82103	6.82103	0.0687039		C	A	0.0136867	0.0136867	388	0.943	0	FALSE	0.467002	0.82526	0.754861
rs114638580:66980066:G:A	FALSE		1	1p31.3	a14	66980066	rs114638580:66980066:G:A	1	TRUE	SGIP1 (19 kb); MIR3117 (110 kb); PDE4B (140 kb); TCTEX1D1 (240 kb)	SGIP1:protein_coding(KNOWN); MIR3117:miRNA(KNOWN); PDE4B:protein_coding(KNOWN); TCTEX1D1:protein_coding(KNOWN)	SGIP1: SH3-domain GRB2-like (endophilin) interacting protein 1 (19 kb)	-0.51094	-0.240505	1.919	0.352907	0.24	0.11	0.01	7	7		NA	PDE4B		MIR3117 PDE4B SGIP1 TCTEX1D1	MIR3117, PDE4B, SGIP1, TCTEX1D1	100422871, 200132, 5142, 84251	Morphine addiction:PDE4B | Purine metabolism:PDE4B | Parathyroid hormone synthesis, secretion and action:PDE4B			cyclic nucleotide catabolic process:PDE4B | cAMP metabolic process:PDE4B | purine ribonucleotide catabolic process:PDE4B | ribonucleotide catabolic process:PDE4B | cyclic nucleotide metabolic process:PDE4B | purine nucleotide catabolic process:PDE4B | purine-containing compound catabolic process:PDE4B | nucleotide catabolic process:PDE4B | nucleoside phosphate catabolic process:PDE4B | nucleobase…	Tissues; Epithelium:TCTEX1D1	MIP_1A	6.45297	6.45297	0.0679821		A	G	0.0230781	0.0230781	369	0.918	0	FALSE	-0.159324	0.462078	0.317336
rs182358699:73048079:C:A	FALSE		1	1p31.1	a15	73048079	rs182358699:73048079:C:A	1	TRUE	RNU6-1246P (140 kb)	RNU6-1246P:snRNA(KNOWN)	RNU6-1246P: RNA, U6 small nuclear 1246, pseudogene (140 kb)	-0.00173131	-0.180993	2.875	0.204111	0.31	0.09	0.01	6	6		NA			RNU6-1246P	RP11-262K1.1	339468						MIP_1A	7.24073	7.24073	0.0768186		A	C	0.0213578	0.0213578	369	0.818	0	FALSE	0.0999489	0.944128	0.834193
rs41301265:75626631:A:G	FALSE		1	1p31.1	a16	75626631	rs41301265:75626631:A:G	1	TRUE	LHX8 (0 kb, 3'utr/3 prime UTR/MODIFIER | nc-exon/Non coding transcript exon/MODIFIER | nc-RNA/Non coding transcript/MODIFIER); RNU6-622P (22 kb); SLC44A5 (41 kb)	LHX8:protein_coding(KNOWN); RNU6-622P:snRNA(KNOWN); SLC44A5:protein_coding(KNOWN)	LHX8: LIM homeobox 8 (0 kb)	1.15041	0.0145262	1.665	0.729968	0.63	0.77	0.7	6	6		NA	ACADM | CRYZ		ACADM CRYZ LHX8 RNU6-622P SLC44A5	CRYZ, LHX8, SLC44A5	1429, 204962, 431707		Synthesis of PC:SLC44A5 | Transport of bile salts and organic acids, metal ions and amine compounds:SLC44A5		cognition:LHX8 | protein homotetramerization:CRYZ | learning or memory:LHX8 | xenobiotic metabolic process:CRYZ | protein homooligomerization:CRYZ		MIP_1A	6.34582	6.34582	0.0667766		G	A	0.0100042	0.0100042	369	0.828	0	FALSE	0.141791	0.105117	0.371375
rs114279212:105809373:A:C	FALSE		1	1p21.1	a22	105809373	rs114279212:105809373:A:C	1	TRUE				-0.04879	-0.176037	5.592	0.837548	0.34	0.14	0.02	6	6		NA											IL_1B	6.04889	6.04889	0.0647938		C	A	0.0177215	0.0177215	361	0.89	0	FALSE	-0.0125063	0.64129	0.609537
rs77805928:171633446:C:T	FALSE		1	1q24.3	a35	171633446	rs77805928:171633446:C:T	1	TRUE	PFN1P1 (6.2 kb); MYOC (12 kb); RPL4P3 (19 kb); VAMP4 (36 kb)	PFN1P1:pseudogene(KNOWN); MYOC:protein_coding(KNOWN); RPL4P3:pseudogene(KNOWN); VAMP4:protein_coding(KNOWN)	PFN1P1: profilin 1 pseudogene 1 (6.2 kb)	-0.0379564	-0.156597	5.014	0.730016	0.19	0.32	0.19	5	5	Motifs|PWM|STAT|, Chromatin_Structure|DNase-seq|Cd34mobilized|, Chromatin_Structure|DNase-seq|Werirb1|, Chromatin_Structure|DNase-seq|Medullo|, Chromatin_Structure|DNase-seq|Medullod341|	NA	FMO4 | METTL13 | SUCO | VAMP4		CYCSP53 DNM3 DNM3-IT1 FMO4 METTL13 MYOC PFN1P1 PRRC2C RN7SL425P RNU6-290P RNU6-773P RPL4P3 SUCO VAMP4	METTL13, MYOC, PRRC2C, VAMP4	23215, 4653, 51603, 8674				negative regulation of cell-matrix adhesion:MYOC | regulation of substrate adhesion-dependent cell spreading:MYOC | regulation of focal adhesion assembly:MYOC | regulation of cell-substrate junction assembly:MYOC | regulation of adherens junction organization:MYOC | negative regulation of cell-substrate adhesion:MYOC | cell-substrate adherens junction assembly:MYOC | focal adhesion assembly:MYOC …		IL_8	6.03416	6.03416	0.0611769		T	C	0.0200592	0.0200592	382	0.853	0	FALSE	0.139634	0.93129	-0.086575
rs34286152:179617923:TA:T	FALSE		1	1q25.2	a37	179617923	rs34286152:179617923:TA:T	1	TRUE	TDRD5 (0 kb); RNU5F-2P (72 kb); NPHS2 (73 kb); AXDND1 (94 kb)	TDRD5:protein_coding(KNOWN); RNU5F-2P:snRNA(KNOWN); NPHS2:protein_coding(KNOWN); AXDND1:protein_coding(KNOWN)	TDRD5: tudor domain containing 5 (0 kb)			7.629								NA	ABL2 | ACBD6 | AL359853.18-1 | AXDND1 | CEP350 | FAM163A | FAM20B | LHX4 | NPHS2 | QSOX1 | RP11-12M5.1 | RP11-12M5.3 | RP11-545A16.3 | RP11-545A16.4 | SOAT1 | TDRD5 | TOR1AIP2 | TOR3A | unnamed		ABL2 ACBD6 AL359853.18-1 AXDND1 CEP350 FAM163A FAM20B HNRNPA1P54 LHX4 MEF2AP1 NPHS2 QSOX1 RNU5F-2P RP11-12M5.1 RP11-12M5.3 RP11-545A16.3 RP11-545A16.4 SOAT1 TDRD5 TOR1AIP1 TOR1AIP2 TOR3A	AXDND1, FAM163A, FAM20B, NPHS2, SOAT1, TDRD5	126859, 148753, 163589, 6646, 7827, 9917		Cell-Cell communication:NPHS2	hereditary Wilms' tumor:NPHS2 | nephroblastoma:NPHS2 | kidney cancer:NPHS2,SOAT1	metanephric glomerulus development:NPHS2 | metanephros development:NPHS2 | metanephric nephron development:NPHS2 | glomerulus development:NPHS2 | kidney development:NPHS2 | ribonucleoprotein complex subunit organization:TDRD5 | renal system development:NPHS2 | urogenital system development:NPHS2 | nephron development:NPHS2 | extracellular structure organization:SOAT1		MCP_1_MCAF	6.35181	6.35181	0.0636726		TA	T	0.41471	0.41471	388	0.999	0	FALSE	0.0679776	0.142166	0.0150391
rs75423704:219619465:G:A	FALSE		1	1q41	a45	219619465	rs75423704:219619465:G:A	1	TRUE	RP11-95P13.1 (3.5 kb, near_gene/Upstream gene/MODIFIER); ZC3H11B (160 kb); LYPLAL1 (230 kb); SLC30A10 (240 kb)	RP11-95P13.1:lincRNA(KNOWN); ZC3H11B:pseudogene(KNOWN); LYPLAL1:protein_coding(KNOWN); SLC30A10:protein_coding(KNOWN)	ZC3H11B: zinc finger CCCH-type containing 11B pseudogene (160 kb)	-0.0476771		2.729	0.575455	0.47	0.4	0.27	3a	3	Motifs|PWM|Nkx3-2|, Motifs|PWM|Nkx3-1|, Motifs|PWM|NKX2-3|, Motifs|PWM|NKX2-3|, Motifs|PWM|NKX3-1|, Motifs|PWM|NKX3-1|, Motifs|PWM|NKX3-2|, Chromatin_Structure|DNase-seq|Gm12865|, Chromatin_Structure|DNase-seq|Th2|, Chromatin_Structure|DNase-seq|Th2wb54553204|, Chromatin_Structure|DNase-seq|Monocd14|, Chromatin_Structure|DNase-seq|Monocd14ro1746|, Protein_Binding|ChIP-seq|BCL11A|GM12878|, Protein…	0.301 Lean body mass	CONTIG21121_RC | IARS2 | LOC643723 | LYPLAL1 | RAB3GAP2 | RP11-135J2.4 | RP11-568G11.4 | RP11-95P13.1 | RRP15 | unnamed	C19orf33 | ECEL1 | FAM20A | KCNN2 | LRRN4CL	C19orf33 CONTIG21121_RC ECEL1 FAM20A IARS2 KCNN2 LOC643723 LRRN4CL LYPLAL1 RAB3GAP2 RIMKLBP2 RP11-135J2.4 RP11-568G11.4 RP11-95P13.1 RRP15 SLC30A10 ZC3H11B	LYPLAL1, RP11-135J2.3, RP11-95P13.1, SLC30A10	101929648, 101929689, 127018, 55532		Transport of bile salts and organic acids, metal ions and amine compounds:SLC30A10		response to peptide hormone:SLC30A10 | negative regulation of neuron apoptotic process:SLC30A10 | cellular response to peptide hormone stimulus:SLC30A10 | cellular response to peptide:SLC30A10 | negative regulation of neuron death:SLC30A10 | regulation of neuron apoptotic process:SLC30A10 | positive regulation of ERK1 and ERK2 cascade:SLC30A10 | neuron apoptotic process:SLC30A10 | protein deacyla…		MIP_1A	6.66707	6.66707	0.0703887		A	G	0.115062	0.115062	369	0.957	0	FALSE	0.0293076	0.232381	0.119964
rs9659229:235251384:A:G	FALSE		1	1q42.3	a48	235251384	rs9659229:235251384:A:G	1	TRUE	TOMM20 (21 kb); SNORA14B (40 kb); RBM34 (43 kb); ARID4B (44 kb)	TOMM20:protein_coding(KNOWN); SNORA14B:snoRNA(KNOWN); RBM34:protein_coding(KNOWN); ARID4B:protein_coding(KNOWN)	TOMM20: translocase of outer mitochondrial membrane 20 homolog (yeast) (21 kb)	-0.504134		1.34	0.421741	0.36	0.14	0.14	5	5	Motifs|PWM|myogenin/NF-1|, Motifs|Footprinting|MyoD|LncapAndro, Motifs|Footprinting|MyoD|Huh7, Motifs|PWM|MyoD|, Motifs|PWM|ID4|, Chromatin_Structure|DNase-seq|Mcf7|, Chromatin_Structure|DNase-seq|Ishikawa|Est10nm30m, Chromatin_Structure|DNase-seq|Ishikawa|Tam10030, Chromatin_Structure|DNase-seq|H1hesc|, Chromatin_Structure|DNase-seq|Lhcnm2|Diff4d, Chromatin_Structure|DNase-seq|Lhcnm2|, Chromatin…	NA	ARID4B | B3GALNT2 | GGPS1	IL15	ARID4B ARID4B-IT1 B3GALNT2 GGPS1 IL15 MIR4753 RBM34 RN7SL668P RPL23AP23 SNORA14B TOMM20	ARID4B, B3GALNT2, GGPS1, IL15, RBM34, SNORA14B, TOMM20	148789, 23029, 3600, 51742, 677802, 9453, 9804			esophageal disease:IL15 | bone remodeling disease:IL15	cellular response to vitamin D:IL15 | cellular response to vitamin:IL15 | response to vitamin D:IL15 | regulation of defense response to virus by host:IL15 | regulation of tissue remodeling:IL15 | positive regulation of tyrosine phosphorylation of STAT protein:IL15 | regulation of defense response to virus:IL15 | cellular response to nutrient:IL15 | regulation of tyrosine phosphorylation of STAT …		IL_1B	6.57884	6.57884	0.0708824		G	A	0.106746	0.106746	361	0.801	0	FALSE	0.047494	0.652317	0.384188
rs187762382:18430674:G:C	FALSE		2	2p24.2	a54	18430674	rs187762382:18430674:G:C	1	TRUE	KCNS3 (0 kb, intron/Intron/MODIFIER | nc-RNA/Non coding transcript/MODIFIER)	KCNS3:protein_coding(KNOWN)	KCNS3: potassium voltage-gated channel, delayed-rectifier, subfamily S, member 3 (0 kb)	-0.0513443	-0.18558	0.462	0.463714	0.35	0.19	0.04	6	6		NA			KCNS3	KCNS3	3790		Regulation of insulin secretion:KCNS3 | Potassium Channels:KCNS3 | Integration of energy metabolism:KCNS3 | Neuronal System:KCNS3		regulation of hormone secretion:KCNS3 | hormone secretion:KCNS3 | hormone transport:KCNS3 | regulation of insulin secretion:KCNS3 | signal release:KCNS3 | insulin secretion:KCNS3 | regulation of peptide hormone secretion:KCNS3 | cellular potassium ion transport:KCNS3 | potassium ion transmembrane transport:KCNS3 | potassium ion transport:KCNS3 | peptide hormone secretion:KCNS3 | regulation of pro…		IL_8	6.48378	6.48378	0.0660787		C	G	0.0128024	0.0128024	382	0.8	0	FALSE	0.03977	0.589967	-0.487416
rs192123933:18476057:A:G	FALSE		2	2p24.2	a54	18476057	rs187762382:18430674:G:C	0.898518	FALSE	KCNS3 (0 kb, intron/Intron/MODIFIER | nc-RNA/Non coding transcript/MODIFIER)	KCNS3:protein_coding(KNOWN)	KCNS3: potassium voltage-gated channel, delayed-rectifier, subfamily S, member 3 (0 kb)	-0.231938	-0.198278	2.656	0.408166	0.22	0.1	0	6	6		NA			KCNS3	KCNS3	3790		Regulation of insulin secretion:KCNS3 | Potassium Channels:KCNS3 | Integration of energy metabolism:KCNS3 | Neuronal System:KCNS3		regulation of hormone secretion:KCNS3 | hormone secretion:KCNS3 | hormone transport:KCNS3 | regulation of insulin secretion:KCNS3 | signal release:KCNS3 | insulin secretion:KCNS3 | regulation of peptide hormone secretion:KCNS3 | cellular potassium ion transport:KCNS3 | potassium ion transmembrane transport:KCNS3 | potassium ion transport:KCNS3 | peptide hormone secretion:KCNS3 | regulation of pro…		IL_8	6.44583	6.44583	0.0656652		G	A	0.0116187	0.0116187	382	0.8	0	FALSE	0.0300472	0.731524	-0.399947
rs76109323:46804120:A:G	FALSE		2	2p21	a60	46804120	rs76109323:46804120:A:G	1	TRUE	RHOQ (0 kb, nc-exon/Non coding transcript exon/MODIFIER | intron/NMD transcript/MODIFIER | intron/Intron/MODIFIER | nc-RNA/Non coding transcript/MODIFIER | near_gene/Downstream gene/MODIFIER | near_gene/Upstream gene/MODIFIER); RP11-417F21.1 (0 kb, intron/Intron/MODIFIER | nc-RNA/Non coding transcript/MODIFIER); PIGF (4 kb, near_gene/Downstream gene/MODIFIER); ATP6V1E2 (34 kb); CRIPT (39 kb)	RHOQ:protein_coding(KNOWN); RP11-417F21.1:antisense(KNOWN); PIGF:protein_coding(KNOWN); ATP6V1E2:protein_coding(KNOWN); CRIPT:protein_coding(KNOWN)	RHOQ: ras homolog family member Q (0 kb)	-0.199712	-0.196772	2.471	0.43285	0.5	0.13	0.33	6	6	Motifs|PWM|HeliosA|	NA	ATP6V1E2 | CRIPT | EPAS1 | EPCAM | PIGF | PRKCE | RHOQ | SOCS5		ATP6V1E2 CRIPT EPAS1 EPCAM LINC01118 LINC01119 PIGF PRKCE RHOQ RN7SL817P RP11-417F21.1 SOCS5 TMEM247	ATP6V1E2, CRIPT, PIGF, RHOQ, RP11-417F21.1	100506142, 23433, 5281, 90423, 9419		Post-translational modification: synthesis of GPI-anchored proteins:PIGF | Translocation of SLC2A4 (GLUT4) to the plasma membrane:RHOQ		regulation of postsynaptic density organization:CRIPT | positive regulation of cell projection organization:RHOQ | postsynaptic density organization:CRIPT | postsynaptic specialization organization:CRIPT | response to peptide hormone:ATP6V1E2,RHOQ | response to insulin:ATP6V1E2,RHOQ | cellular response to peptide hormone stimulus:ATP6V1E2,RHOQ | regulation of protein localization to membrane:CRIP…		MIP_1A	6.32448	6.32448	0.066537		G	A	0.0295351	0.0295351	369	0.954	0	FALSE	0.0682085	1.01953	0.562385
rs116606423:50123457:T:G	FALSE		2	2p16.3	a61	50123457	rs116606423:50123457:T:G	1	TRUE	RPL7P13 (17 kb); NRXN1 (22 kb)	RPL7P13:pseudogene(KNOWN); NRXN1:protein_coding(KNOWN)	RPL7P13: ribosomal protein L7 pseudogene 13 (17 kb)	0.277422	-0.129213	5.423	0.657399	0.34	0.14	0.09	7	7		NA			NRXN1 RPL7P13	NRXN1	9378				grooming behavior:NRXN1 | synaptic membrane adhesion:NRXN1 | regulation of presynapse assembly:NRXN1 | regulation of presynapse organization:NRXN1 | neuromuscular process controlling balance:NRXN1 | regulation of synapse assembly:NRXN1 | presynapse assembly:NRXN1 | presynapse organization:NRXN1 | regulation of behavior:NRXN1 | localization within membrane:NRXN1 | protein localization to synapse:N…		IL_1B	7.4603	7.4603	0.0809586		G	T	0.0174626	0.0174626	361	0.912	0	FALSE	0.242138	1.10555	0.743766
rs114065378:50119868:T:A	FALSE		2	2p16.3	a61	50119868	rs116606423:50123457:T:G	0.99989	FALSE	SNORA75 (3.7 kb, near_gene/Upstream gene/MODIFIER); RPL7P13 (13 kb); NRXN1 (26 kb)	SNORA75:snoRNA(KNOWN); RPL7P13:pseudogene(KNOWN); NRXN1:protein_coding(KNOWN)	SNORA75: Small nucleolar RNA SNORA75 (3.7 kb)	-0.338487	-0.208951	3.101	0.456619	0.31	0.13	0.05	6	6	Motifs|PWM|Hoxa10|, Motifs|PWM|Cdx2|, Motifs|PWM|Cdx1|, Motifs|PWM|CART1|, Motifs|PWM|Isl2|, Motifs|PWM|UNCX|	NA			NRXN1 RPL7P13 SNORA75	NRXN1	9378				grooming behavior:NRXN1 | synaptic membrane adhesion:NRXN1 | regulation of presynapse assembly:NRXN1 | regulation of presynapse organization:NRXN1 | neuromuscular process controlling balance:NRXN1 | regulation of synapse assembly:NRXN1 | presynapse assembly:NRXN1 | presynapse organization:NRXN1 | regulation of behavior:NRXN1 | localization within membrane:NRXN1 | protein localization to synapse:N…		IL_1B	7.43952	7.43952	0.080722		A	T	0.0174711	0.0174711	361	0.908	0	FALSE	0.24508	1.10576	0.744329
rs115570295:50119006:T:C	FALSE		2	2p16.3	a61	50119006	rs116606423:50123457:T:G	0.999979	FALSE	SNORA75 (2.9 kb, near_gene/Upstream gene/MODIFIER); RPL7P13 (13 kb); NRXN1 (27 kb)	SNORA75:snoRNA(KNOWN); RPL7P13:pseudogene(KNOWN); NRXN1:protein_coding(KNOWN)	SNORA75: Small nucleolar RNA SNORA75 (2.9 kb)	-0.412031	-0.232619	1.067	0.473946	0.28	0.12	0.05	7	7		NA			NRXN1 RPL7P13 SNORA75	NRXN1	9378				grooming behavior:NRXN1 | synaptic membrane adhesion:NRXN1 | regulation of presynapse assembly:NRXN1 | regulation of presynapse organization:NRXN1 | neuromuscular process controlling balance:NRXN1 | regulation of synapse assembly:NRXN1 | presynapse assembly:NRXN1 | presynapse organization:NRXN1 | regulation of behavior:NRXN1 | localization within membrane:NRXN1 | protein localization to synapse:N…		IL_1B	7.43919	7.43919	0.0807183		C	T	0.0174212	0.0174212	361	0.911	0	FALSE	0.243644	1.10655	0.745071
rs75615882:50118505:T:A	FALSE		2	2p16.3	a61	50118505	rs116606423:50123457:T:G	0.999978	FALSE	SNORA75 (2.4 kb, near_gene/Upstream gene/MODIFIER); RPL7P13 (12 kb); NRXN1 (27 kb)	SNORA75:snoRNA(KNOWN); RPL7P13:pseudogene(KNOWN); NRXN1:protein_coding(KNOWN)	SNORA75: Small nucleolar RNA SNORA75 (2.4 kb)	-0.805023	-0.285344	1.034	0.226731	0.29	0.1	0.09	6	6		NA			NRXN1 RPL7P13 SNORA75	NRXN1	9378				grooming behavior:NRXN1 | synaptic membrane adhesion:NRXN1 | regulation of presynapse assembly:NRXN1 | regulation of presynapse organization:NRXN1 | neuromuscular process controlling balance:NRXN1 | regulation of synapse assembly:NRXN1 | presynapse assembly:NRXN1 | presynapse organization:NRXN1 | regulation of behavior:NRXN1 | localization within membrane:NRXN1 | protein localization to synapse:N…		IL_1B	7.43693	7.43693	0.0806921		A	T	0.0174199	0.0174199	361	0.909	0	FALSE	0.243715	1.10618	0.744897
rs77571750:50115426:T:G	FALSE		2	2p16.3	a61	50115426	rs116606423:50123457:T:G	0.999965	FALSE	SNORA75 (0.58 kb, near_gene/Downstream gene/MODIFIER); RPL7P13 (8.9 kb); NRXN1 (30 kb)	SNORA75:snoRNA(KNOWN); RPL7P13:pseudogene(KNOWN); NRXN1:protein_coding(KNOWN)	SNORA75: Small nucleolar RNA SNORA75 (0.58 kb)	-0.322168	-0.213477	1.507	0.244952	0.35	0.06	0.05	6	6		NA			NRXN1 RPL7P13 SNORA75	NRXN1	9378				grooming behavior:NRXN1 | synaptic membrane adhesion:NRXN1 | regulation of presynapse assembly:NRXN1 | regulation of presynapse organization:NRXN1 | neuromuscular process controlling balance:NRXN1 | regulation of synapse assembly:NRXN1 | presynapse assembly:NRXN1 | presynapse organization:NRXN1 | regulation of behavior:NRXN1 | localization within membrane:NRXN1 | protein localization to synapse:N…		IL_1B	7.43371	7.43371	0.080655		G	T	0.0174101	0.0174101	361	0.909	0	FALSE	0.244112	1.10626	0.745122
rs75272883:59610249:T:C	FALSE		2	2p16.1	a63	59610249	rs75272883:59610249:T:C	1	TRUE	RP11-444A22.1 (0 kb, intron/Intron/MODIFIER | nc-RNA/Non coding transcript/MODIFIER); AC007131.2 (0 kb, intron/Intron/MODIFIER | nc-RNA/Non coding transcript/MODIFIER)	RP11-444A22.1:lincRNA(KNOWN); AC007131.2:lincRNA(KNOWN)		-0.293115	-0.224334	2.212	0.780154	0.2	0.07	0.07	7	7		NA			AC007131.2RP11-444A22.1	AC007131.1	101927285						IL_8	6.06434	6.06434	0.0615067		C	T	0.041868	0.041868	382	0.955	0	FALSE	0.0909648	0.17188	-0.161326
rs114089087:83078007:G:A	FALSE		2	2p12	a67	83078007	rs114089087:83078007:G:A	1	TRUE	MTND6P7 (33 kb); MTND5P27 (33 kb); MTND4P25 (35 kb)	MTND6P7:pseudogene(KNOWN); MTND5P27:pseudogene(KNOWN); MTND4P25:pseudogene(KNOWN)	MTND6P7: MT-ND6 pseudogene 7 (33 kb)	-0.343038	-0.218705	1.045	0.471285	0.39	0.15	0.08	5	5		NA			MTND4P25 MTND5P27 MTND6P7	AC098817.5	1720						IL_1B	6.62675	6.62675	0.0714317		A	G	0.0359931	0.0359931	361	0.947	0	FALSE	0.0422908	0.756172	0.286142
rs116741563:124530224:G:A	FALSE		2	2q14.3	a76	124530224	rs116741563:124530224:G:A	1	TRUE	RN7SKP102 (97 kb)	RN7SKP102:misc_RNA(KNOWN)	RN7SKP102: RNA, 7SK small nuclear pseudogene 102 (97 kb)	-0.12325	-0.19125	4.182	0.663502	0.32	0.06	0	7	7		NA			RN7SKP102								IL_1B	6.48953	6.48953	0.0698576		A	G	0.0129235	0.0129235	361	0.887	0	FALSE	0.0148696	2.44202	1.063
rs140320351:165437725:T:C	FALSE		2	2q24.3	a84	165437725	rs140320351:165437725:T:C	1	TRUE	GRB14 (0 kb, intron/Intron/MODIFIER | nc-RNA/Non coding transcript/MODIFIER); COBLL1 (72 kb); SNORA70F (110 kb)	GRB14:protein_coding(KNOWN); COBLL1:protein_coding(KNOWN); SNORA70F:snoRNA(KNOWN)	GRB14: growth factor receptor-bound protein 14 (0 kb)	-0.180495	-0.191869	1.696	0.627632	0.26	0.24	0.05	5	5	Chromatin_Structure|DNase-seq|Werirb1|	NA	SLC38A11		COBLL1 GRB14 SLC38A11 SNORA70F	COBLL1, GRB14, SNORA70F	100337591, 22837, 2888						IL_8	6.6366	6.6366	0.0677416		C	T	0.0157919	0.0157919	382	0.954	0	FALSE	0.296028	0.845106	-0.382088
rs142442003:452463:A:G	FALSE		3	3p26.3	a100	452463	rs142442003:452463:A:G	1	TRUE	CHL1 (1.4 kb, near_gene/Downstream gene/MODIFIER); CHL1-AS1 (25 kb); RPS8P6 (100 kb); RNU6-1194P (130 kb)	CHL1:protein_coding(KNOWN); CHL1-AS1:antisense(KNOWN); RPS8P6:pseudogene(KNOWN); RNU6-1194P:snRNA(KNOWN)	CHL1: cell adhesion molecule L1-like (1.4 kb)	-0.0777455	-0.184694	2.797	0.838399	0.46	0.33	0.04	6	6		NA	CHL1		CHL1 CHL1-AS1 CHL1-AS2 RNU6-1194P RPS8P6	AC090044.1, CHL1, CHL1-AS1	101927193, 101927215, 10752			malignant ovarian surface epithelial-stromal neoplasm:CHL1 | ovary epithelial cancer:CHL1 | ovarian carcinoma:CHL1	negative regulation of neuron apoptotic process:CHL1 | cognition:CHL1 | negative regulation of neuron death:CHL1 | regulation of neuron apoptotic process:CHL1 | neuron apoptotic process:CHL1 | regulation of neuron death:CHL1 | neuron death:CHL1	Tissues; Epithelium:CHL1	MIP_1A	6.22984	6.22984	0.0654711		G	A	0.013973	0.013973	369	0.867	0	FALSE	0.257409	1.19412	0.99274
rs4521206:16145226:G:C	FALSE		3	3p25.1	a103	16145226	rs4521206:16145226:G:C	1	TRUE	GALNT15 (71 kb); DPH3 (150 kb); OXNAD1 (160 kb); RFTN1 (210 kb)	GALNT15:protein_coding(KNOWN); DPH3:protein_coding(KNOWN); OXNAD1:protein_coding(KNOWN); RFTN1:protein_coding(KNOWN)	GALNT15: UDP-N-acetyl-alpha-D-galactosamine:polypeptide N-acetylgalactosaminyltransferase 15 (71 kb)	0.418115	0.189562	1.815	0.461763	0.35	0.55	0.38	4	4		NA	COLQ | DPH3 | PLCL2		ANKRD28 COLQ DPH3 GALNT15 MIR563 OXNAD1 PLCL2 RFTN1	COLQ, DPH3, GALNT15, OXNAD1, RFTN1	117248, 23180, 285381, 8292, 92106				tRNA wobble uridine modification:DPH3 | tRNA wobble base modification:DPH3 | glycoprotein biosynthetic process:GALNT15 | B cell receptor signaling pathway:RFTN1 | tRNA metabolic process:DPH3 | extracellular matrix organization:COLQ | ncRNA processing:DPH3 | regulation of synapse organization:COLQ | glycoprotein metabolic process:GALNT15 | regulation of synapse structure or activity:COLQ | regulat…		IL_10	6.06774	6.06774	0.0607718		C	G	0.0128824	0.0128824	387	0.852	0	FALSE	0.0921455	2.29656	1.28752
rs6785855:39853194:G:A	FALSE		3	3p22.1	a108	39853194	rs12638790:39891794:G:A	1	FALSE	MYRIP (0 kb, intron/NMD transcript/MODIFIER | intron/Intron/MODIFIER | nc-RNA/Non coding transcript/MODIFIER); RNU4-56P (160 kb); NFU1P1 (170 kb)	MYRIP:protein_coding(KNOWN); RNU4-56P:snRNA(KNOWN); NFU1P1:pseudogene(KNOWN)	MYRIP: myosin VIIA and Rab interacting protein (0 kb)	-0.113372	-0.0849599	2.796	0.743329	0.21	0.44	0.57	5	5	Motifs|PWM|TBX20|, Chromatin_Structure|DNase-seq|Cerebellumoc|, Chromatin_Structure|DNase-seq|Th1|, Chromatin_Structure|DNase-seq|Hmvecdblad|, Chromatin_Structure|DNase-seq|Hmvecdblneo|, Chromatin_Structure|DNase-seq|Gm19239|, Chromatin_Structure|DNase-seq|Huvec|	NA	RPL14 | WDR48		MYRIP NFU1P1 RNU4-56P RPL14 WDR48	MYRIP	25924						IL_1B	6.43904	6.43904	0.0692782		A	G	0.0110803	0.0110803	361	1	2	FALSE	0.212523	1.32872	0.733187
rs12638790:39891794:G:A	FALSE		3	3p22.1	a108	39891794	rs12638790:39891794:G:A	1	TRUE	MYRIP (0 kb, intron/NMD transcript/MODIFIER | intron/Intron/MODIFIER | nc-RNA/Non coding transcript/MODIFIER); RNU4-56P (120 kb); NFU1P1 (210 kb)	MYRIP:protein_coding(KNOWN); RNU4-56P:snRNA(KNOWN); NFU1P1:pseudogene(KNOWN)	MYRIP: myosin VIIA and Rab interacting protein (0 kb)	-0.0117403	-0.165271	2.665	0.639507	0.32	0.19	0.07	5	5	Chromatin_Structure|DNase-seq|T47d|Est10nm30m, Chromatin_Structure|DNase-seq|T47d|, Chromatin_Structure|DNase-seq|Lhcnm2|Diff4d, Chromatin_Structure|DNase-seq|Lhcnm2|	NA	WDR48		MYRIP NFU1P1 RNU4-56P WDR48	MYRIP	25924						IL_1B	6.43904	6.43904	0.0692782		A	G	0.0110803	0.0110803	361	1	2	FALSE	0.212523	1.32872	0.733187
rs139453626:47700006:A:G	FALSE		3	3p21.31	a109	47700006	rs139453626:47700006:A:G	1	TRUE	SMARCC1 (0 kb, intron/Intron/MODIFIER | nc-RNA/Non coding transcript/MODIFIER); CSPG5 (78 kb); RN7SL870P (98 kb); DHX30 (140 kb)	SMARCC1:protein_coding(KNOWN); CSPG5:protein_coding(KNOWN); RN7SL870P:misc_RNA(KNOWN); DHX30:protein_coding(KNOWN)	SMARCC1: SWI/SNF related, matrix associated, actin dependent regulator of chromatin, subfamily c, member 1 (0 kb)	-0.0287575	-0.0334133	10.3	0.815645	0.36	0.04	0.08	5	5		NA			CSPG5 DHX30 ELP6 MAP4 MIR1226 PTPN23 RN7SL870P SCAP SMARCC1	CSPG5, DHX30, ELP6, SMARCC1	10675, 22907, 54859, 6599		Defective B4GALT7 causes EDS, progeroid type:CSPG5 | Defective B3GAT3 causes JDSSDHD:CSPG5 | Defective B3GALT6 causes EDSP2 and SEMDJL1:CSPG5 | A tetrasaccharide linker sequence is required for GAG synthesis:CSPG5 | Diseases associated with glycosaminoglycan metabolism:CSPG5 | Chondroitin sulfate/dermatan sulfate metabolism:CSPG5 | Heparan sulfate/heparin (HS-GAG) metabolism:CSPG5 | Glycosaminogl…	prostate cancer:SMARCC1 | male reproductive organ cancer:SMARCC1	substrate adhesion-dependent cell spreading:CSPG5 | regulation of substrate adhesion-dependent cell spreading:CSPG5 | positive regulation of substrate adhesion-dependent cell spreading:CSPG5 | tRNA wobble uridine modification:ELP6 | positive regulation of cell-substrate adhesion:CSPG5 | tRNA wobble base modification:ELP6 | regulation of cell-substrate adhesion:CSPG5 | glial cell differentiation:C…		IL_10	7.6209	7.6209	0.0774373		G	A	0.0155193	0.0155193	387	0.819	0	FALSE	0.147891	2.41717	1.90535
rs75152811:61213786:A:G	FALSE		3	3p14.2	a112	61213786	rs75152811:61213786:A:G	1	TRUE	FHIT (0 kb, intron/Intron/MODIFIER | nc-RNA/Non coding transcript/MODIFIER)	FHIT:protein_coding(KNOWN)	FHIT: fragile histidine triad (0 kb)	-0.0546908	-0.183629	5.697	0.800115	0.3	0.09	0	6	6	Motifs|PWM|Hic1|, Motifs|PWM|ZNF410|, Chromatin_Structure|FAIRE|Panislets|	NA			FHIT	FHIT	2272			esophageal disease:FHIT | autosomal dominant disease:FHIT | hereditary breast ovarian cancer:FHIT | non-small cell lung carcinoma:FHIT | bile duct adenocarcinoma:FHIT | cholangiocarcinoma:FHIT | bile duct cancer:FHIT | bile duct carcinoma:FHIT	negative regulation of protein catabolic process:FHIT | regulation of cellular protein catabolic process:FHIT | negative regulation of cellular protein catabolic process:FHIT | proteasomal protein catabolic process:FHIT | negative regulation of cellular catabolic process:FHIT | regulation of protein catabolic process:FHIT | regulation of proteasomal protein catabolic process:FHIT | negative regul…		IL_1B	6.28178	6.28178	0.0674717		G	A	0.0177978	0.0177978	361	0.949	0	FALSE	0.173345	0.951322	0.246678
rs114628728:86200887:G:T	FALSE		3	3p12.1	a117	86200887	rs114628728:86200887:G:T	1	TRUE	CADM2 (77 kb); RNU6-1129P (84 kb); CADM2-AS1 (120 kb); PRKRIRP2 (140 kb)	CADM2:protein_coding(KNOWN); RNU6-1129P:snRNA(KNOWN); CADM2-AS1:antisense(KNOWN); PRKRIRP2:pseudogene(KNOWN)	CADM2: cell adhesion molecule 2 (77 kb)	-0.0683941	-0.174317	0.607	0.613656	0.32	0.12	0.03	6	6		NA			CADM2 CADM2-AS1 PRKRIRP2 RN7SKP284 RNU6-1129P	CADM2, CADM2-AS1	100874038, 253559						MIP_1A	6.09483	6.09483	0.06395		T	G	0.0132778	0.0132778	369	0.848	0	FALSE	0.245468	0.846588	0.440639
rs141203577:113267770:C:A	FALSE		3	3q13.2	a122	113267770	rs141203577:113267770:C:A	1	TRUE	SIDT1 (0 kb, intron/Intron/MODIFIER | nc-RNA/Non coding transcript/MODIFIER); SPICE1 (34 kb); SIDT1-AS1 (40 kb); MIR4446 (46 kb)	SIDT1:protein_coding(KNOWN); SPICE1:protein_coding(KNOWN); SIDT1-AS1:antisense(KNOWN); MIR4446:miRNA(KNOWN)	SIDT1: SID1 transmembrane family, member 1 (0 kb)	-0.631761	-0.236683	0.289	0.421432	0.42	0.23	0.09	7	7		NA	GTPBP8 | WDR52		ATP6V1A GTPBP8 KIAA2018 MIR4446 NAA50 RN7SL767P SIDT1 SIDT1-AS1 SPICE1 WDR52 WDR52-AS1	KIAA2018, MIR4446, SIDT1, SPICE1	100616476, 152185, 205717, 54847				RNA localization:SIDT1 | establishment of organelle localization:SPICE1 | centrosome cycle:SPICE1 | microtubule organizing center organization:SPICE1		IL_10	6.09018	6.09018	0.0610138		A	C	0.0143229	0.0143229	387	0.91	0	FALSE	0.153188	2.28762	1.20584
rs369826722:113363069:C:T	FALSE		3	3q13.2	a122	113363069	rs369826722:113363069:C:T	1	TRUE	KIAA2018 (4.2 kb, near_gene/Downstream gene/MODIFIER); RN7SL767P (11 kb); SIDT1 (15 kb); MIR4446 (49 kb)	KIAA2018:protein_coding(KNOWN); RN7SL767P:misc_RNA(KNOWN); SIDT1:protein_coding(KNOWN); MIR4446:miRNA(KNOWN)	KIAA2018: KIAA2018 (4.2 kb)	-0.34094	-0.221811		0.188922				7	7		NA			ATP6V1A GRAMD1C KIAA2018 MIR4446 NAA50 RN7SL767P SIDT1 SIDT1-AS1 SPICE1 WDR52 WDR52-AS1	KIAA2018, MIR4446, NAA50, SIDT1	100616476, 205717, 54847, 80218				RNA localization:SIDT1		IL_10	6.07329	6.07329	0.0608311		T	C	0.0419553	0.0419553	387	0.826	0	FALSE	0.179411	1.28498	0.600099
rs184862948:122069425:C:A	FALSE		3	3q21.1	a124	122069425	rs184862948:122069425:C:A	1	TRUE	CSTA (8.6 kb); CCDC58 (9 kb); HNRNPA1P23 (32 kb); FAM162A (34 kb)	CSTA:protein_coding(KNOWN); CCDC58:protein_coding(KNOWN); HNRNPA1P23:pseudogene(KNOWN); FAM162A:protein_coding(KNOWN)	CSTA: cystatin A (stefin A) (8.6 kb)	-0.461027	-0.234035	0.944	0.613776	0.19	0.13	0.05	6	6		NA	CCDC58 | CD86 | CSTA | DTX3L | HSPBAP1 | KPNA1 | PARP14 | PARP15 | WDR5B	NOSIP	CASR CCDC58 CD86 CSTA DTX3L FAM162A HNRNPA1P23 HSPBAP1 KP1 KPNA1 NOSIP PARP14 PARP15 PARP9 WDR5B	CCDC58, CD86, CSTA, FAM162A, WDR5B	131076, 1475, 26355, 54554, 942	Viral myocarditis:CD86 | Rheumatoid arthritis:CD86		hemorrhagic disease:CD86 | atopic dermatitis:CSTA | non-small cell lung carcinoma:CSTA | purpura:CD86 | blood coagulation disease:CD86 | dermatitis:CSTA | sarcoidosis:CD86 | hypersensitivity reaction type IV disease:CD86	covalent chromatin modification:WDR5B | positive regulation of cell adhesion:CD86 | positive regulation of interleukin-2 production:CD86 | histone modification:WDR5B | histone lysine methylation:WDR5B | peptidyl-lysine methylation:WDR5B | histone methylation:WDR5B | regulation of T cell differentiation:CD86 | regulation of cell-cell adhesion:CD86 | regulation of interleukin-2 production:CD86 | ne…		IL_1B	7.23387	7.23387	0.0783761		A	C	0.0133213	0.0133213	361	0.949	0	FALSE	0.140697	1.53933	1.15768
3:122069615:G:A	FALSE		3	3q21.1	a124	122069615	rs184862948:122069425:C:A	0.997657	FALSE	CSTA (8.8 kb); CCDC58 (8.8 kb); HNRNPA1P23 (32 kb); FAM162A (33 kb)	CSTA:protein_coding(KNOWN); CCDC58:protein_coding(KNOWN); HNRNPA1P23:pseudogene(KNOWN); FAM162A:protein_coding(KNOWN)	CSTA: cystatin A (stefin A) (8.8 kb)	-0.188173	-0.177523		0.447147							NA	CCDC58 | CD86 | CSTA | DTX3L | HSPBAP1 | KPNA1 | PARP14 | PARP15 | WDR5B	NOSIP	CASR CCDC58 CD86 CSTA DTX3L FAM162A HNRNPA1P23 HSPBAP1 KP1 KPNA1 NOSIP PARP14 PARP15 PARP9 WDR5B	CCDC58, CD86, CSTA, FAM162A, WDR5B	131076, 1475, 26355, 54554, 942	Viral myocarditis:CD86 | Rheumatoid arthritis:CD86		hemorrhagic disease:CD86 | atopic dermatitis:CSTA | non-small cell lung carcinoma:CSTA | purpura:CD86 | blood coagulation disease:CD86 | dermatitis:CSTA | sarcoidosis:CD86 | hypersensitivity reaction type IV disease:CD86	covalent chromatin modification:WDR5B | positive regulation of cell adhesion:CD86 | positive regulation of interleukin-2 production:CD86 | histone modification:WDR5B | histone lysine methylation:WDR5B | peptidyl-lysine methylation:WDR5B | histone methylation:WDR5B | regulation of T cell differentiation:CD86 | regulation of cell-cell adhesion:CD86 | regulation of interleukin-2 production:CD86 | ne…		IL_1B	7.03698	7.03698	0.0761276		A	G	0.0130748	0.0130748	361	0.936	0	FALSE	0.145615	1.55701	1.15992
rs74321866:122200170:T:C	FALSE		3	3q21.1	a124	122200170	rs184862948:122069425:C:A	0.995812	FALSE	KPNA1 (0 kb, intron/NMD transcript/MODIFIER | intron/Intron/MODIFIER); RP11-592P9.1 (3.7 kb, near_gene/Upstream gene/MODIFIER); PARP9 (47 kb); WDR5B (65 kb)	KPNA1:protein_coding(KNOWN); RP11-592P9.1:pseudogene(KNOWN); PARP9:protein_coding(KNOWN); WDR5B:protein_coding(KNOWN)	KPNA1: karyopherin alpha 1 (importin alpha 5) (0 kb)	0.257795	0.0235382	14.73	0.959709	0.46	0.1	0.06	5	5		NA	CCDC58 | CD86 | CSTA | DTX3L | HSPBAP1 | KPNA1 | PARP14 | PARP15 | WDR5B	CD74 | NOSIP	CASR CCDC58 CD74 CD86 CSTA DTX3L EIF4BP8 FAM162A HNRNPA1P23 HSPBAP1 KP1 KPNA1 NOSIP PARP14 PARP15 PARP9 RP11-592P9.1 WDR5B	CCDC58, CD86, CSTA, FAM162A, KPNA1, PARP14, PARP9, WDR5B	131076, 1475, 26355, 3836, 54554, 54625, 83666, 942	Viral myocarditis:CD86 | Rheumatoid arthritis:CD86		autosomal dominant disease:KPNA1 | hemorrhagic disease:CD86 | atopic dermatitis:CSTA | non-small cell lung carcinoma:CSTA | purpura:CD86 | blood coagulation disease:CD86 | dermatitis:CSTA | sarcoidosis:CD86 | hypersensitivity reaction type IV disease:CD86	positive regulation of chromatin binding:PARP9 | regulation of chromatin binding:PARP9 | protein ADP-ribosylation:PARP14,PARP9 | regulation of defense response to virus by host:PARP9 | covalent chromatin modification:WDR5B | positive regulation of double-strand break repair via nonhomologous end joining:PARP9 | positive regulation of cell adhesion:CD86 | positive regulation of DNA repair:PARP9 | …		IL_1B	6.89359	6.89359	0.0744881		C	T	0.0134626	0.0134626	361	0.983	0	FALSE	0.143042	1.43403	1.08433
rs189664162:122236541:C:T	FALSE		3	3q21.1	a124	122236541	rs184862948:122069425:C:A	0.995217	FALSE	KPNA1 (2.7 kb, near_gene/Upstream gene/MODIFIER); PARP9 (10 kb); DTX3L (47 kb); PARP15 (60 kb)	KPNA1:protein_coding(KNOWN); PARP9:protein_coding(KNOWN); DTX3L:protein_coding(KNOWN); PARP15:protein_coding(KNOWN)	KPNA1: karyopherin alpha 1 (importin alpha 5) (2.7 kb)	-0.172782	-0.172851	4.787	0.707478	0.38	0.38	0.31	6	6		NA	CCDC58 | CD86 | CSTA | DTX3L | HSPBAP1 | KPNA1 | PARP14 | PARP15 | WDR5B	CD74 | NOSIP	CASR CCDC58 CD74 CD86 CSTA DTX3L EIF4BP8 FAM162A HNRNPA1P23 HSPBAP1 KP1 KPNA1 NOSIP PARP14 PARP15 PARP9 WDR5B	CCDC58, CD86, CSTA, DTX3L, KPNA1, PARP14, PARP15, PARP9, WDR5B	131076, 1475, 151636, 165631, 3836, 54554, 54625, 83666, 942	Viral myocarditis:CD86 | Rheumatoid arthritis:CD86		autosomal dominant disease:KPNA1 | hemorrhagic disease:CD86 | atopic dermatitis:CSTA | non-small cell lung carcinoma:CSTA | purpura:CD86 | blood coagulation disease:CD86 | dermatitis:CSTA | sarcoidosis:CD86 | hypersensitivity reaction type IV disease:CD86	histone H2B ubiquitination:DTX3L | positive regulation of chromatin binding:DTX3L,PARP9 | regulation of chromatin binding:DTX3L,PARP9 | protein ADP-ribosylation:PARP14,PARP15,PARP9 | regulation of defense response to virus by host:DTX3L,PARP9 | histone ubiquitination:DTX3L | covalent chromatin modification:WDR5B,DTX3L | positive regulation of double-strand break repair via nonhomologous end joini…		IL_1B	6.86412	6.86412	0.0741509		T	C	0.0134889	0.0134889	361	0.983	0	FALSE	0.142906	1.42391	1.07775
rs116243028:165379000:G:A	FALSE		3	3q26.1	a133	165379000	rs116243028:165379000:G:A	1	TRUE	BCHE (110 kb)	BCHE:protein_coding(KNOWN)	BCHE: butyrylcholinesterase (110 kb)	0.0111927	-0.158995	2.713	0.445187	0.2	0.11	0.07	6	6		NA			BCHE	BCHE	590		Synthesis of PC:BCHE		cognition:BCHE | learning or memory:BCHE | xenobiotic metabolic process:BCHE | response to glucocorticoid:BCHE		MIP_1A	6.76697	6.76697	0.0715095		A	G	0.0186257	0.0186257	369	0.875	0	FALSE	0.161456	0.201606	-0.149981
rs113980675:165336727:C:T	FALSE		3	3q26.1	a133	165336727	rs116243028:165379000:G:A	0.999957	FALSE	RP11-85M11.2 (0 kb, intron/Intron/MODIFIER | nc-RNA/Non coding transcript/MODIFIER); BCHE (150 kb)	RP11-85M11.2:lincRNA(KNOWN); BCHE:protein_coding(KNOWN)	BCHE: butyrylcholinesterase (150 kb)	-0.353474	-0.216293	2.075	0.398729	0.28	0.06	0.01	5	5		NA			BCHE RP11-85M11.2	BCHE	590		Synthesis of PC:BCHE		cognition:BCHE | learning or memory:BCHE | xenobiotic metabolic process:BCHE | response to glucocorticoid:BCHE		MIP_1A	6.75309	6.75309	0.071354		T	C	0.0186284	0.0186284	369	0.872	0	FALSE	0.162999	0.199397	-0.151844
rs181814047:20591770:C:T	FALSE	EXTRACT: IL_1B-> || low maf; TOPLIST: IL_1B-> || low maf || toplist low maf	4	4p15.31	a144	20591770	rs181814047:20591770:C:T	1	TRUE	SLIT2 (0 kb, intron/Intron/MODIFIER); MIR218-1 (62 kb); PACRGL (110 kb); KCNIP4 (140 kb)	SLIT2:protein_coding(KNOWN); MIR218-1:miRNA(KNOWN); PACRGL:protein_coding(KNOWN); KCNIP4:protein_coding(KNOWN)	SLIT2: slit homolog 2 (Drosophila) (0 kb)	-0.424805	-0.239553	1.265	0.414433	0.24	0.2	0.04	7	7		NA	SLIT2	TEKT2	KCNIP4 MIR218-1 PACRGL SLIT2 SLIT2-IT1 TEKT2	KCNIP4, MIR218-1, PACRGL, SLIT2	133015, 407000, 80333, 9353	Axon guidance:SLIT2	Netrin-1 signaling:SLIT2 | Signaling by ROBO receptors:SLIT2	non-small cell lung carcinoma:MIR218-1	regulation of granulocyte chemotaxis:SLIT2 | central nervous system neuron development:SLIT2 | regulation of leukocyte chemotaxis:SLIT2 | negative regulation of protein phosphorylation:MIR218-1,SLIT2 | positive regulation of chemotaxis:SLIT2 | negative regulation of phosphorylation:MIR218-1,SLIT2 | negative regulation of protein kinase activity:MIR218-1 | negative regulation of protein serine/thr…		IL_10	7.11821	7.11821	0.0720618		T	C	0.0102556	0.0102556	387	0.929	0	FALSE	0.249983	2.81917	1.47201
rs71607277:61755151:C:T	FALSE		4	4q13.1	a152	61755151	rs71607277:61755151:C:T	1	TRUE	MIR548AG1 (33 kb)	MIR548AG1:miRNA(KNOWN)	MIR548AG1: microRNA 548ag-1 (33 kb)	-0.262041	-0.219998	1.412	0.278647	0.33	0.14	0.02	7	7		NA			MIR548AG1	MIR548AG1	100616450						IL_10	7.3004	7.3004	0.0740124		T	C	0.021814	0.021814	387	0.932	0	FALSE	0.0411028	1.96353	1.31987
rs114354990:75930440:G:A	FALSE		4	4q13.3	a155	75930440	rs114354990:75930440:G:A	1	TRUE	PARM1 (0 kb, intron/Intron/MODIFIER); RP11-44F21.2 (0 kb, intron/Intron/MODIFIER | nc-RNA/Non coding transcript/MODIFIER); HSPE1P23 (87 kb); BTC (210 kb)	PARM1:protein_coding(KNOWN); RP11-44F21.2:antisense(KNOWN); HSPE1P23:pseudogene(KNOWN); BTC:protein_coding(KNOWN)	PARM1: prostate androgen-regulated mucin-like protein 1 (0 kb)	0.0442509	0.860359	3.511	0.692901	0.45	0.33	0.16	4	4		NA	NAAA | PARM1		AA BTC HSPE1P23 PARM1 RP11-44F21.2	NAAA, PARM1, RP11-44F21.2, RP11-44F21.3, RP11-44F21.5	100505946, 100507388, 101928702, 25849, 27163				regulation of DNA metabolic process:PARM1 | positive regulation of DNA metabolic process:PARM1 | neurotransmitter transport:NAAA		IL_1B	6.38147	6.38147	0.0686172		A	G	0.0125541	0.0125541	361	0.871	0	FALSE	0.184642	1.60152	1.06074
rs12641012:79181915:A:T	FALSE		4	4q21.21	a156	79181915	rs12641012:79181915:A:T	1	TRUE	FRAS1 (0 kb, intron/Intron/MODIFIER); SERBP1P5 (79 kb); MINOS1P4 (120 kb)	FRAS1:protein_coding(KNOWN); SERBP1P5:pseudogene(KNOWN); MINOS1P4:pseudogene(KNOWN)	FRAS1: Fraser syndrome 1 (0 kb)	-0.177129	-0.194627	0.272	0.35248	0.24	0.13	0.05	7	7		NA	ANXA3 | CNOT6L | RP11-792D21.2	GALNT9	ANXA3 CNOT6L FRAS1 GALNT9 MINOS1P4 RP11-792D21.2 SERBP1P5	ANXA3, CNOT6L, FRAS1	246175, 306, 80144	ECM-receptor interaction:FRAS1			metanephros development:FRAS1 | cell-cell adhesion via plasma-membrane adhesion molecules:ANXA3 | kidney development:FRAS1 | ribonucleoprotein complex subunit organization:CNOT6L | renal system development:FRAS1 | urogenital system development:FRAS1 | epithelial cell migration:ANXA3 | epithelium migration:ANXA3 | positive regulation of endothelial cell migration:ANXA3 | tissue migration:ANXA3 | r…		MCP_1_MCAF	6.4381	6.4381	0.0645989		T	A	0.0374161	0.0374161	388	0.936	0	FALSE	0.114427	0.351289	0.207938
rs189879902:79226739:C:T	FALSE		4	4q21.21	a156	79226739	rs12641012:79181915:A:T	0.950764	FALSE	FRAS1 (0 kb, intron/Intron/MODIFIER); MINOS1P4 (74 kb); SERBP1P5 (120 kb); ANXA3 (250 kb)	FRAS1:protein_coding(KNOWN); MINOS1P4:pseudogene(KNOWN); SERBP1P5:pseudogene(KNOWN); ANXA3:protein_coding(KNOWN)	FRAS1: Fraser syndrome 1 (0 kb)	-0.321657	-0.217593	2.852	0.773327	0.24	0.06	0.04	7	7		NA	ANXA3 | CNOT6L | RP11-792D21.2	GALNT9	ANXA3 CNOT6L FRAS1 GALNT9 MINOS1P4 RP11-792D21.2 SERBP1P5	ANXA3, CNOT6L, FRAS1	246175, 306, 80144	ECM-receptor interaction:FRAS1			metanephros development:FRAS1 | cell-cell adhesion via plasma-membrane adhesion molecules:ANXA3 | kidney development:FRAS1 | ribonucleoprotein complex subunit organization:CNOT6L | renal system development:FRAS1 | urogenital system development:FRAS1 | epithelial cell migration:ANXA3 | epithelium migration:ANXA3 | positive regulation of endothelial cell migration:ANXA3 | tissue migration:ANXA3 | r…		MCP_1_MCAF	6.41731	6.41731	0.0643755		T	C	0.0382063	0.0382063	388	0.972	0	FALSE	0.0992543	0.279383	0.18004
rs202228312:79227492:G:A	FALSE		4	4q21.21	a156	79227492	rs12641012:79181915:A:T	0.950706	FALSE	FRAS1 (0 kb, intron/Intron/MODIFIER); MINOS1P4 (73 kb); SERBP1P5 (120 kb); ANXA3 (250 kb)	FRAS1:protein_coding(KNOWN); MINOS1P4:pseudogene(KNOWN); SERBP1P5:pseudogene(KNOWN); ANXA3:protein_coding(KNOWN)	FRAS1: Fraser syndrome 1 (0 kb)	-0.655991	-0.26037		0.706475	0.28	0.08	0	7	7		NA	ANXA3 | CNOT6L | RP11-792D21.2	GALNT9	ANXA3 CNOT6L FRAS1 GALNT9 MINOS1P4 RP11-792D21.2 SERBP1P5	ANXA3, CNOT6L, FRAS1	246175, 306, 80144	ECM-receptor interaction:FRAS1			metanephros development:FRAS1 | cell-cell adhesion via plasma-membrane adhesion molecules:ANXA3 | kidney development:FRAS1 | ribonucleoprotein complex subunit organization:CNOT6L | renal system development:FRAS1 | urogenital system development:FRAS1 | epithelial cell migration:ANXA3 | epithelium migration:ANXA3 | positive regulation of endothelial cell migration:ANXA3 | tissue migration:ANXA3 | r…		MCP_1_MCAF	6.4156	6.4156	0.0643576		A	G	0.0382038	0.0382038	388	0.973	0	FALSE	0.0991247	0.278897	0.180005
rs79411201:79224003:C:A	FALSE		4	4q21.21	a156	79224003	rs12641012:79181915:A:T	0.951089	FALSE	FRAS1 (0 kb, intron/Intron/MODIFIER); MINOS1P4 (76 kb); SERBP1P5 (120 kb); ANXA3 (250 kb)	FRAS1:protein_coding(KNOWN); MINOS1P4:pseudogene(KNOWN); SERBP1P5:pseudogene(KNOWN); ANXA3:protein_coding(KNOWN)	FRAS1: Fraser syndrome 1 (0 kb)	-0.332004	-0.223503	3.638	0.66096	0.23	0.04	0	7	7		NA	ANXA3 | CNOT6L | FRAS1 | RP11-792D21.2	GALNT9	ANXA3 CNOT6L FRAS1 GALNT9 MINOS1P4 RP11-792D21.2 SERBP1P5	ANXA3, CNOT6L, FRAS1	246175, 306, 80144	ECM-receptor interaction:FRAS1			metanephros development:FRAS1 | cell-cell adhesion via plasma-membrane adhesion molecules:ANXA3 | kidney development:FRAS1 | ribonucleoprotein complex subunit organization:CNOT6L | renal system development:FRAS1 | urogenital system development:FRAS1 | epithelial cell migration:ANXA3 | epithelium migration:ANXA3 | positive regulation of endothelial cell migration:ANXA3 | tissue migration:ANXA3 | r…		MCP_1_MCAF	6.41451	6.41451	0.064346		A	C	0.0381689	0.0381689	388	0.973	0	FALSE	0.099552	0.280332	0.179507
rs369681220:79223343:AT:A	FALSE		4	4q21.21	a156	79223343	rs12641012:79181915:A:T	0.95108	FALSE	FRAS1 (0 kb); MINOS1P4 (77 kb); SERBP1P5 (120 kb); ANXA3 (250 kb)	FRAS1:protein_coding(KNOWN); MINOS1P4:pseudogene(KNOWN); SERBP1P5:pseudogene(KNOWN); ANXA3:protein_coding(KNOWN)	FRAS1: Fraser syndrome 1 (0 kb)											NA	ANXA3 | CNOT6L | RP11-792D21.2	GALNT9	ANXA3 CNOT6L FRAS1 GALNT9 MINOS1P4 RP11-792D21.2 SERBP1P5	ANXA3, CNOT6L, FRAS1	246175, 306, 80144	ECM-receptor interaction:FRAS1			metanephros development:FRAS1 | cell-cell adhesion via plasma-membrane adhesion molecules:ANXA3 | kidney development:FRAS1 | ribonucleoprotein complex subunit organization:CNOT6L | renal system development:FRAS1 | urogenital system development:FRAS1 | epithelial cell migration:ANXA3 | epithelium migration:ANXA3 | positive regulation of endothelial cell migration:ANXA3 | tissue migration:ANXA3 | r…		MCP_1_MCAF	6.40959	6.40959	0.0642926		A	AT	0.0381545	0.0381545	388	0.972	0	FALSE	0.0994384	0.280648	0.179537
rs10857007:79159059:T:G	FALSE		4	4q21.21	a156	79159059	rs12641012:79181915:A:T	0.98712	FALSE	FRAS1 (0 kb, intron/Intron/MODIFIER); SERBP1P5 (56 kb); MINOS1P4 (140 kb); HNRNPA1P56 (250 kb)	FRAS1:protein_coding(KNOWN); SERBP1P5:pseudogene(KNOWN); MINOS1P4:pseudogene(KNOWN); HNRNPA1P56:pseudogene(KNOWN)	FRAS1: Fraser syndrome 1 (0 kb)	0.0564323	-0.161985	6.587	0.737486	0.38	0.19	0.13	6	6	Motifs|PWM|Nkx2-6|, Motifs|PWM|aMEF-2|	NA	ANXA3 | CNOT6L | RP11-792D21.2	GALNT9	ANXA3 CNOT6L FRAS1 GALNT9 HNRNPA1P56 MINOS1P4 RP11-792D21.2 SERBP1P5	ANXA3, CNOT6L, FRAS1	246175, 306, 80144	ECM-receptor interaction:FRAS1			metanephros development:FRAS1 | cell-cell adhesion via plasma-membrane adhesion molecules:ANXA3 | kidney development:FRAS1 | ribonucleoprotein complex subunit organization:CNOT6L | renal system development:FRAS1 | urogenital system development:FRAS1 | epithelial cell migration:ANXA3 | epithelium migration:ANXA3 | positive regulation of endothelial cell migration:ANXA3 | tissue migration:ANXA3 | r…		MCP_1_MCAF	6.39229	6.39229	0.0641073		T	G	0.0367642	0.0367642	388	0.935	0	FALSE	0.118458	0.303654	0.153343
rs116734117:79211619:T:C	FALSE		4	4q21.21	a156	79211619	rs12641012:79181915:A:T	0.989562	FALSE	FRAS1 (0 kb, intron/Intron/MODIFIER); MINOS1P4 (89 kb); SERBP1P5 (110 kb)	FRAS1:protein_coding(KNOWN); MINOS1P4:pseudogene(KNOWN); SERBP1P5:pseudogene(KNOWN)	FRAS1: Fraser syndrome 1 (0 kb)	-0.3836	-0.225071	0.549	0.576975	0.35	0.09	0.03	6	6		NA	ANXA3 | CNOT6L | RP11-792D21.2	GALNT9	ANXA3 CNOT6L FRAS1 GALNT9 MINOS1P4 RP11-792D21.2 SERBP1P5	ANXA3, CNOT6L, FRAS1	246175, 306, 80144	ECM-receptor interaction:FRAS1			metanephros development:FRAS1 | cell-cell adhesion via plasma-membrane adhesion molecules:ANXA3 | kidney development:FRAS1 | ribonucleoprotein complex subunit organization:CNOT6L | renal system development:FRAS1 | urogenital system development:FRAS1 | epithelial cell migration:ANXA3 | epithelium migration:ANXA3 | positive regulation of endothelial cell migration:ANXA3 | tissue migration:ANXA3 | r…		MCP_1_MCAF	6.36821	6.36821	0.0638488		C	T	0.0368247	0.0368247	388	0.948	0	FALSE	0.113358	0.28916	0.148064
rs1385133:79231933:G:A	FALSE		4	4q21.21	a156	79231933	rs12641012:79181915:A:T	0.987629	FALSE	FRAS1 (0 kb, intron/Intron/MODIFIER); MINOS1P4 (68 kb); SERBP1P5 (130 kb); ANXA3 (240 kb)	FRAS1:protein_coding(KNOWN); MINOS1P4:pseudogene(KNOWN); SERBP1P5:pseudogene(KNOWN); ANXA3:protein_coding(KNOWN)	FRAS1: Fraser syndrome 1 (0 kb)	-0.162495	-0.11248	0.737	0.651453	0.37	0.22	0.23	3a	3	Motifs|PWM|Lhx1|, Motifs|PWM|Hoxc4|, Motifs|PWM|Hoxb4|, Motifs|PWM|Hoxa7|, Motifs|PWM|Hoxa4|, Motifs|PWM|Cart1|, Motifs|PWM|Arid3a|, Motifs|PWM|Alx4|, Motifs|PWM|Pax-7|, Motifs|PWM|HOXA7|, Motifs|PWM|OTP|, Motifs|PWM|Prop-1|, Motifs|PWM|Lmx1a|, Motifs|PWM|Lmx1b|, Motifs|PWM|Og2x|, Motifs|PWM|Otp|, Motifs|PWM|Pax7|, Motifs|PWM|Phox2b|, Motifs|PWM|Prop1|, Motifs|PWM|Uncx4.1|, Motifs|PWM|Lhx3|, Moti…	NA	ANXA3 | CNOT6L | FRAS1 | RP11-792D21.2	GALNT9	ANXA3 CNOT6L FRAS1 GALNT9 MINOS1P4 RP11-792D21.2 SERBP1P5	ANXA3, CNOT6L, FRAS1	246175, 306, 80144	ECM-receptor interaction:FRAS1			metanephros development:FRAS1 | cell-cell adhesion via plasma-membrane adhesion molecules:ANXA3 | kidney development:FRAS1 | ribonucleoprotein complex subunit organization:CNOT6L | renal system development:FRAS1 | urogenital system development:FRAS1 | epithelial cell migration:ANXA3 | epithelium migration:ANXA3 | positive regulation of endothelial cell migration:ANXA3 | tissue migration:ANXA3 | r…		MCP_1_MCAF	6.35881	6.35881	0.0637479		A	G	0.0363816	0.0363816	388	0.981	0	FALSE	0.108039	0.27986	0.148358
rs200928090:79225163:T:C	FALSE		4	4q21.21	a156	79225163	rs12641012:79181915:A:T	0.962688	FALSE	FRAS1 (0 kb, intron/Intron/MODIFIER); MINOS1P4 (75 kb); SERBP1P5 (120 kb); ANXA3 (250 kb)	FRAS1:protein_coding(KNOWN); MINOS1P4:pseudogene(KNOWN); SERBP1P5:pseudogene(KNOWN); ANXA3:protein_coding(KNOWN)	FRAS1: Fraser syndrome 1 (0 kb)	-0.235315	-0.208163		0.560634	0.37	0.04	0	6	6	6:Motifs|PWM|Foxl1|;6:NA	NA	ANXA3 | CNOT6L | RP11-792D21.2	GALNT9	ANXA3 CNOT6L FRAS1 GALNT9 MINOS1P4 RP11-792D21.2 SERBP1P5	ANXA3, CNOT6L, FRAS1	246175, 306, 80144	ECM-receptor interaction:FRAS1			metanephros development:FRAS1 | cell-cell adhesion via plasma-membrane adhesion molecules:ANXA3 | kidney development:FRAS1 | ribonucleoprotein complex subunit organization:CNOT6L | renal system development:FRAS1 | urogenital system development:FRAS1 | epithelial cell migration:ANXA3 | epithelium migration:ANXA3 | positive regulation of endothelial cell migration:ANXA3 | tissue migration:ANXA3 | r…		MCP_1_MCAF	6.33476	6.33476	0.0634893		C	T	0.0374717	0.0374717	388	0.973	0	FALSE	0.0908011	0.27716	0.17147
rs139257468:79226983:G:C	FALSE		4	4q21.21	a156	79226983	rs12641012:79181915:A:T	0.962476	FALSE	FRAS1 (0 kb, intron/Intron/MODIFIER); MINOS1P4 (73 kb); SERBP1P5 (120 kb); ANXA3 (250 kb)	FRAS1:protein_coding(KNOWN); MINOS1P4:pseudogene(KNOWN); SERBP1P5:pseudogene(KNOWN); ANXA3:protein_coding(KNOWN)	FRAS1: Fraser syndrome 1 (0 kb)	-0.270915	-0.210297	0.674	0.518293	0.16	0.06	0.01	7	7		NA	ANXA3 | CNOT6L | FRAS1 | RP11-792D21.2	GALNT9	ANXA3 CNOT6L FRAS1 GALNT9 MINOS1P4 RP11-792D21.2 SERBP1P5	ANXA3, CNOT6L, FRAS1	246175, 306, 80144	ECM-receptor interaction:FRAS1			metanephros development:FRAS1 | cell-cell adhesion via plasma-membrane adhesion molecules:ANXA3 | kidney development:FRAS1 | ribonucleoprotein complex subunit organization:CNOT6L | renal system development:FRAS1 | urogenital system development:FRAS1 | epithelial cell migration:ANXA3 | epithelium migration:ANXA3 | positive regulation of endothelial cell migration:ANXA3 | tissue migration:ANXA3 | r…		MCP_1_MCAF	6.32822	6.32822	0.0634193		C	G	0.0374691	0.0374691	388	0.975	0	FALSE	0.0903413	0.276098	0.171251
rs200523215:79223639:G:T	FALSE		4	4q21.21	a156	79223639	rs12641012:79181915:A:T	0.962872	FALSE	FRAS1 (0 kb, intron/Intron/MODIFIER); MINOS1P4 (77 kb); SERBP1P5 (120 kb); ANXA3 (250 kb)	FRAS1:protein_coding(KNOWN); MINOS1P4:pseudogene(KNOWN); SERBP1P5:pseudogene(KNOWN); ANXA3:protein_coding(KNOWN)	FRAS1: Fraser syndrome 1 (0 kb)	-0.232948	-0.200542		0.718977	0.21	0.04	0	7	7		NA	ANXA3 | CNOT6L | RP11-792D21.2	GALNT9	ANXA3 CNOT6L FRAS1 GALNT9 MINOS1P4 RP11-792D21.2 SERBP1P5	ANXA3, CNOT6L, FRAS1	246175, 306, 80144	ECM-receptor interaction:FRAS1			metanephros development:FRAS1 | cell-cell adhesion via plasma-membrane adhesion molecules:ANXA3 | kidney development:FRAS1 | ribonucleoprotein complex subunit organization:CNOT6L | renal system development:FRAS1 | urogenital system development:FRAS1 | epithelial cell migration:ANXA3 | epithelium migration:ANXA3 | positive regulation of endothelial cell migration:ANXA3 | tissue migration:ANXA3 | r…		MCP_1_MCAF	6.32715	6.32715	0.0634078		T	G	0.0374342	0.0374342	388	0.975	0	FALSE	0.0907516	0.277573	0.170838
rs201454765:79224144:G:A	FALSE		4	4q21.21	a156	79224144	rs12641012:79181915:A:T	0.96283	FALSE	FRAS1 (0 kb, intron/Intron/MODIFIER); MINOS1P4 (76 kb); SERBP1P5 (120 kb); ANXA3 (250 kb)	FRAS1:protein_coding(KNOWN); MINOS1P4:pseudogene(KNOWN); SERBP1P5:pseudogene(KNOWN); ANXA3:protein_coding(KNOWN)	FRAS1: Fraser syndrome 1 (0 kb)	-0.237048	-0.206113		0.776204	0.23	0.06	0	6	6	Motifs|PWM|AIRE|	NA	ANXA3 | CNOT6L | RP11-792D21.2	GALNT9	ANXA3 CNOT6L FRAS1 GALNT9 MINOS1P4 RP11-792D21.2 SERBP1P5	ANXA3, CNOT6L, FRAS1	246175, 306, 80144	ECM-receptor interaction:FRAS1			metanephros development:FRAS1 | cell-cell adhesion via plasma-membrane adhesion molecules:ANXA3 | kidney development:FRAS1 | ribonucleoprotein complex subunit organization:CNOT6L | renal system development:FRAS1 | urogenital system development:FRAS1 | epithelial cell migration:ANXA3 | epithelium migration:ANXA3 | positive regulation of endothelial cell migration:ANXA3 | tissue migration:ANXA3 | r…		MCP_1_MCAF	6.32526	6.32526	0.0633875		A	G	0.0374344	0.0374344	388	0.976	0	FALSE	0.0906185	0.277177	0.170768
rs60581294:79232873:C:T	FALSE		4	4q21.21	a156	79232873	rs12641012:79181915:A:T	0.961597	FALSE	FRAS1 (0 kb, intron/Intron/MODIFIER); MINOS1P4 (67 kb); SERBP1P5 (130 kb); ANXA3 (240 kb)	FRAS1:protein_coding(KNOWN); MINOS1P4:pseudogene(KNOWN); SERBP1P5:pseudogene(KNOWN); ANXA3:protein_coding(KNOWN)	FRAS1: Fraser syndrome 1 (0 kb)	-0.19055	0.0137213	1.739	0.446187	0.25	0.17	0.04	4	4	Chromatin_Structure|DNase-seq|H9es|, Chromatin_Structure|DNase-seq|Mcf7|, Chromatin_Structure|FAIRE|H1hesc|, Protein_Binding|ChIP-seq|CTCF|HFF-Myc|	NA	ANXA3 | CNOT6L | FRAS1 | RP11-792D21.2	GALNT9	ANXA3 CNOT6L FRAS1 GALNT9 MINOS1P4 RP11-792D21.2 SERBP1P5	ANXA3, CNOT6L, FRAS1	246175, 306, 80144	ECM-receptor interaction:FRAS1			metanephros development:FRAS1 | cell-cell adhesion via plasma-membrane adhesion molecules:ANXA3 | kidney development:FRAS1 | ribonucleoprotein complex subunit organization:CNOT6L | renal system development:FRAS1 | urogenital system development:FRAS1 | epithelial cell migration:ANXA3 | epithelium migration:ANXA3 | positive regulation of endothelial cell migration:ANXA3 | tissue migration:ANXA3 | r…		MCP_1_MCAF	6.28754	6.28754	0.0629823		T	C	0.0374136	0.0374136	388	0.988	0	FALSE	0.0881795	0.271681	0.170038
rs77881378:79233412:T:C	FALSE		4	4q21.21	a156	79233412	rs12641012:79181915:A:T	0.961468	FALSE	FRAS1 (0 kb, intron/Intron/MODIFIER); MINOS1P4 (67 kb); SERBP1P5 (130 kb); ANXA3 (240 kb)	FRAS1:protein_coding(KNOWN); MINOS1P4:pseudogene(KNOWN); SERBP1P5:pseudogene(KNOWN); ANXA3:protein_coding(KNOWN)	FRAS1: Fraser syndrome 1 (0 kb)	0.023256	-0.17789	1.787	0.704859	0.23	0.12	0.03	6	6	Motifs|PWM|Foxq1|	NA	ANXA3 | CNOT6L | FRAS1 | RP11-792D21.2	GALNT9	ANXA3 CNOT6L FRAS1 GALNT9 MINOS1P4 RP11-792D21.2 SERBP1P5	ANXA3, CNOT6L, FRAS1	246175, 306, 80144	ECM-receptor interaction:FRAS1			metanephros development:FRAS1 | cell-cell adhesion via plasma-membrane adhesion molecules:ANXA3 | kidney development:FRAS1 | ribonucleoprotein complex subunit organization:CNOT6L | renal system development:FRAS1 | urogenital system development:FRAS1 | epithelial cell migration:ANXA3 | epithelium migration:ANXA3 | positive regulation of endothelial cell migration:ANXA3 | tissue migration:ANXA3 | r…		MCP_1_MCAF	6.28545	6.28545	0.0629597		C	T	0.037411	0.037411	388	0.988	0	FALSE	0.0880105	0.271305	0.17007
rs75740091:79238166:C:T	FALSE		4	4q21.21	a156	79238166	rs12641012:79181915:A:T	0.960946	FALSE	FRAS1 (0 kb, intron/Intron/MODIFIER); MINOS1P4 (62 kb); SERBP1P5 (130 kb); ANXA3 (230 kb)	FRAS1:protein_coding(KNOWN); MINOS1P4:pseudogene(KNOWN); SERBP1P5:pseudogene(KNOWN); ANXA3:protein_coding(KNOWN)	FRAS1: Fraser syndrome 1 (0 kb)	0.0643126	-0.158651	3.011	0.345777	0.18	0.19	0.1	7	7		NA	ANXA3 | CNOT6L | FRAS1 | RP11-792D21.2	GALNT9	ANXA3 CNOT6L FRAS1 GALNT9 MINOS1P4 RP11-792D21.2 SERBP1P5	ANXA3, CNOT6L, FRAS1	246175, 306, 80144	ECM-receptor interaction:FRAS1			metanephros development:FRAS1 | cell-cell adhesion via plasma-membrane adhesion molecules:ANXA3 | kidney development:FRAS1 | ribonucleoprotein complex subunit organization:CNOT6L | renal system development:FRAS1 | urogenital system development:FRAS1 | epithelial cell migration:ANXA3 | epithelium migration:ANXA3 | positive regulation of endothelial cell migration:ANXA3 | tissue migration:ANXA3 | r…		MCP_1_MCAF	6.26545	6.26545	0.0627453		T	C	0.0373931	0.0373931	388	0.994	0	FALSE	0.0869349	0.26914	0.169637
rs28402983:79235148:T:C	FALSE		4	4q21.21	a156	79235148	rs12641012:79181915:A:T	0.926277	FALSE	FRAS1 (0 kb, intron/Intron/MODIFIER); MINOS1P4 (65 kb); SERBP1P5 (130 kb); ANXA3 (240 kb)	FRAS1:protein_coding(KNOWN); MINOS1P4:pseudogene(KNOWN); SERBP1P5:pseudogene(KNOWN); ANXA3:protein_coding(KNOWN)	FRAS1: Fraser syndrome 1 (0 kb)	-0.0645203	-0.172931	1.129	0.686215	0.15	0.17	0.03	5	5	Chromatin_Structure|DNase-seq|Lhcnm2|, Chromatin_Structure|DNase-seq|Lhcnm2|Diff4d, Chromatin_Structure|DNase-seq|Hsmm|, Chromatin_Structure|DNase-seq|Hsmmt|	NA	ANXA3 | CNOT6L | RP11-792D21.2	GALNT9	ANXA3 CNOT6L FRAS1 GALNT9 MINOS1P4 RP11-792D21.2 SERBP1P5	ANXA3, CNOT6L, FRAS1	246175, 306, 80144	ECM-receptor interaction:FRAS1			metanephros development:FRAS1 | cell-cell adhesion via plasma-membrane adhesion molecules:ANXA3 | kidney development:FRAS1 | ribonucleoprotein complex subunit organization:CNOT6L | renal system development:FRAS1 | urogenital system development:FRAS1 | epithelial cell migration:ANXA3 | epithelium migration:ANXA3 | positive regulation of endothelial cell migration:ANXA3 | tissue migration:ANXA3 | r…		MCP_1_MCAF	6.2549	6.2549	0.0626315		C	T	0.0387062	0.0387062	388	0.981	0	FALSE	0.0770348	0.291353	0.210138
rs72866333:79247529:C:G	FALSE		4	4q21.21	a156	79247529	rs12641012:79181915:A:T	0.960772	FALSE	FRAS1 (0 kb, intron/Intron/MODIFIER); MINOS1P4 (53 kb); SERBP1P5 (140 kb); ANXA3 (230 kb)	FRAS1:protein_coding(KNOWN); MINOS1P4:pseudogene(KNOWN); SERBP1P5:pseudogene(KNOWN); ANXA3:protein_coding(KNOWN)	FRAS1: Fraser syndrome 1 (0 kb)	-0.218677	-0.211023	5.742	0.763717	0.33	0.29	0.12	5	5	Chromatin_Structure|DNase-seq|H7es|	NA	ANXA3 | CNOT6L | FRAS1 | RP11-792D21.2	GALNT9	ANXA3 CNOT6L FRAS1 GALNT9 MINOS1P4 RP11-792D21.2 SERBP1P5	ANXA3, CNOT6L, FRAS1	246175, 306, 80144	ECM-receptor interaction:FRAS1			metanephros development:FRAS1 | cell-cell adhesion via plasma-membrane adhesion molecules:ANXA3 | kidney development:FRAS1 | ribonucleoprotein complex subunit organization:CNOT6L | renal system development:FRAS1 | urogenital system development:FRAS1 | epithelial cell migration:ANXA3 | epithelium migration:ANXA3 | positive regulation of endothelial cell migration:ANXA3 | tissue migration:ANXA3 | r…		MCP_1_MCAF	6.25174	6.25174	0.0625974		G	C	0.0373686	0.0373686	388	0.991	0	FALSE	0.0864193	0.268642	0.169759
rs78513854:79247325:G:A	FALSE		4	4q21.21	a156	79247325	rs12641012:79181915:A:T	0.960775	FALSE	FRAS1 (0 kb, intron/Intron/MODIFIER); MINOS1P4 (53 kb); SERBP1P5 (140 kb); ANXA3 (230 kb)	FRAS1:protein_coding(KNOWN); MINOS1P4:pseudogene(KNOWN); SERBP1P5:pseudogene(KNOWN); ANXA3:protein_coding(KNOWN)	FRAS1: Fraser syndrome 1 (0 kb)	-0.0042579	-0.173651	3.054	0.414913	0.25	0.17	0.02	7	7		NA	ANXA3 | CNOT6L | FRAS1 | RP11-792D21.2	GALNT9	ANXA3 CNOT6L FRAS1 GALNT9 MINOS1P4 RP11-792D21.2 SERBP1P5	ANXA3, CNOT6L, FRAS1	246175, 306, 80144	ECM-receptor interaction:FRAS1			metanephros development:FRAS1 | cell-cell adhesion via plasma-membrane adhesion molecules:ANXA3 | kidney development:FRAS1 | ribonucleoprotein complex subunit organization:CNOT6L | renal system development:FRAS1 | urogenital system development:FRAS1 | epithelial cell migration:ANXA3 | epithelium migration:ANXA3 | positive regulation of endothelial cell migration:ANXA3 | tissue migration:ANXA3 | r…		MCP_1_MCAF	6.25152	6.25152	0.062595		A	G	0.0373699	0.0373699	388	0.991	0	FALSE	0.0863925	0.268581	0.169716
rs11937525:79240674:C:T	FALSE		4	4q21.21	a156	79240674	rs12641012:79181915:A:T	0.960778	FALSE	FRAS1 (0 kb, 3'utr/3 prime UTR/MODIFIER | intron/Intron/MODIFIER | near_gene/Downstream gene/MODIFIER); MINOS1P4 (60 kb); SERBP1P5 (140 kb); ANXA3 (230 kb)	FRAS1:protein_coding(KNOWN); MINOS1P4:pseudogene(KNOWN); SERBP1P5:pseudogene(KNOWN); ANXA3:protein_coding(KNOWN)	FRAS1: Fraser syndrome 1 (0 kb)	0.0231053	-0.167267	3.446	0.642453	0.4	0.71	0.74	6	6	Motifs|PWM|Irf3|, Motifs|Footprinting|IRF|LncapAndro, Motifs|PWM|IRF|	NA	ANXA3 | CNOT6L | FRAS1 | RP11-792D21.2	GALNT9	ANXA3 CNOT6L FRAS1 GALNT9 MINOS1P4 RP11-792D21.2 SERBP1P5	ANXA3, CNOT6L, FRAS1	246175, 306, 80144	ECM-receptor interaction:FRAS1			metanephros development:FRAS1 | cell-cell adhesion via plasma-membrane adhesion molecules:ANXA3 | kidney development:FRAS1 | ribonucleoprotein complex subunit organization:CNOT6L | renal system development:FRAS1 | urogenital system development:FRAS1 | epithelial cell migration:ANXA3 | epithelium migration:ANXA3 | positive regulation of endothelial cell migration:ANXA3 | tissue migration:ANXA3 | r…		MCP_1_MCAF	6.25142	6.25142	0.0625945		T	C	0.0373711	0.0373711	388	1	2	FALSE	0.0863958	0.268503	0.169606
rs11944878:79242860:A:G	FALSE		4	4q21.21	a156	79242860	rs12641012:79181915:A:T	0.960778	FALSE	FRAS1 (0 kb, intron/Intron/MODIFIER | near_gene/Downstream gene/MODIFIER); MINOS1P4 (57 kb); SERBP1P5 (140 kb); ANXA3 (230 kb)	FRAS1:protein_coding(KNOWN); MINOS1P4:pseudogene(KNOWN); SERBP1P5:pseudogene(KNOWN); ANXA3:protein_coding(KNOWN)	FRAS1: Fraser syndrome 1 (0 kb)	-0.669739	-0.263579	1.4	0.285454	0.18	0.14	0.01	7	7		NA	ANXA3 | CNOT6L | FRAS1 | RP11-792D21.2	GALNT9	ANXA3 CNOT6L FRAS1 GALNT9 MINOS1P4 RP11-792D21.2 SERBP1P5	ANXA3, CNOT6L, FRAS1	246175, 306, 80144	ECM-receptor interaction:FRAS1			metanephros development:FRAS1 | cell-cell adhesion via plasma-membrane adhesion molecules:ANXA3 | kidney development:FRAS1 | ribonucleoprotein complex subunit organization:CNOT6L | renal system development:FRAS1 | urogenital system development:FRAS1 | epithelial cell migration:ANXA3 | epithelium migration:ANXA3 | positive regulation of endothelial cell migration:ANXA3 | tissue migration:ANXA3 | r…		MCP_1_MCAF	6.25142	6.25142	0.0625945		G	A	0.0373711	0.0373711	388	0.997	0	FALSE	0.0863958	0.268503	0.169606
rs76321757:79243775:G:A	FALSE		4	4q21.21	a156	79243775	rs12641012:79181915:A:T	0.960778	FALSE	FRAS1 (0 kb, intron/Intron/MODIFIER | near_gene/Downstream gene/MODIFIER); MINOS1P4 (57 kb); SERBP1P5 (140 kb); ANXA3 (230 kb)	FRAS1:protein_coding(KNOWN); MINOS1P4:pseudogene(KNOWN); SERBP1P5:pseudogene(KNOWN); ANXA3:protein_coding(KNOWN)	FRAS1: Fraser syndrome 1 (0 kb)	-0.0352975	-0.184471	6.441	0.676856	0.37	0.2	0.13	6	6	Motifs|PWM|DMRT5|	NA	ANXA3 | CNOT6L | FRAS1 | RP11-792D21.2	GALNT9	ANXA3 CNOT6L FRAS1 GALNT9 MINOS1P4 RP11-792D21.2 SERBP1P5	ANXA3, CNOT6L, FRAS1	246175, 306, 80144	ECM-receptor interaction:FRAS1			metanephros development:FRAS1 | cell-cell adhesion via plasma-membrane adhesion molecules:ANXA3 | kidney development:FRAS1 | ribonucleoprotein complex subunit organization:CNOT6L | renal system development:FRAS1 | urogenital system development:FRAS1 | epithelial cell migration:ANXA3 | epithelium migration:ANXA3 | positive regulation of endothelial cell migration:ANXA3 | tissue migration:ANXA3 | r…		MCP_1_MCAF	6.25142	6.25142	0.0625945		A	G	0.0373711	0.0373711	388	0.996	0	FALSE	0.0863958	0.268503	0.169606
rs391641:79248194:G:A	FALSE		4	4q21.21	a156	79248194	rs12641012:79181915:A:T	0.960778	FALSE	FRAS1 (0 kb, intron/Intron/MODIFIER); MINOS1P4 (52 kb); SERBP1P5 (140 kb); ANXA3 (220 kb)	FRAS1:protein_coding(KNOWN); MINOS1P4:pseudogene(KNOWN); SERBP1P5:pseudogene(KNOWN); ANXA3:protein_coding(KNOWN)	FRAS1: Fraser syndrome 1 (0 kb)	-0.0166016	-0.16345	4.86	0.485785	0.32	0.21	0.07	6	6	Motifs|PWM|FOXG1|	NA	ANXA3 | CNOT6L | FRAS1 | RP11-792D21.2	GALNT9	ANXA3 CNOT6L FRAS1 GALNT9 MINOS1P4 RP11-792D21.2 SERBP1P5	ANXA3, CNOT6L, FRAS1	246175, 306, 80144	ECM-receptor interaction:FRAS1			metanephros development:FRAS1 | cell-cell adhesion via plasma-membrane adhesion molecules:ANXA3 | kidney development:FRAS1 | ribonucleoprotein complex subunit organization:CNOT6L | renal system development:FRAS1 | urogenital system development:FRAS1 | epithelial cell migration:ANXA3 | epithelium migration:ANXA3 | positive regulation of endothelial cell migration:ANXA3 | tissue migration:ANXA3 | r…		MCP_1_MCAF	6.25142	6.25142	0.0625945		A	G	0.0373711	0.0373711	388	1	2	FALSE	0.0863958	0.268503	0.169606
rs150579350:79235243:G:GT	FALSE		4	4q21.21	a156	79235243	rs12641012:79181915:A:T	0.979274	FALSE	FRAS1 (0 kb, intron/Intron/MODIFIER); MINOS1P4 (65 kb); SERBP1P5 (130 kb); ANXA3 (240 kb)	FRAS1:protein_coding(KNOWN); MINOS1P4:pseudogene(KNOWN); SERBP1P5:pseudogene(KNOWN); ANXA3:protein_coding(KNOWN)	FRAS1: Fraser syndrome 1 (0 kb)			1.344					6	6		NA	ANXA3 | CNOT6L | RP11-792D21.2	GALNT9	ANXA3 CNOT6L FRAS1 GALNT9 MINOS1P4 RP11-792D21.2 SERBP1P5	ANXA3, CNOT6L, FRAS1	246175, 306, 80144	ECM-receptor interaction:FRAS1			metanephros development:FRAS1 | cell-cell adhesion via plasma-membrane adhesion molecules:ANXA3 | kidney development:FRAS1 | ribonucleoprotein complex subunit organization:CNOT6L | renal system development:FRAS1 | urogenital system development:FRAS1 | epithelial cell migration:ANXA3 | epithelium migration:ANXA3 | positive regulation of endothelial cell migration:ANXA3 | tissue migration:ANXA3 | r…		MCP_1_MCAF	6.22463	6.22463	0.0623062		GT	G	0.0374111	0.0374111	388	0.94	0	FALSE	0.108953	0.319009	0.182342
rs17409269:87237109:T:C	FALSE		4	4q21.3	a157	87237109	rs17409269:87237109:T:C	1	TRUE	MAPK10 (0 kb, intron/NMD transcript/MODIFIER | intron/Intron/MODIFIER | nc-RNA/Non coding transcript/MODIFIER); RN7SKP96 (20 kb); MIR4452 (230 kb)	MAPK10:protein_coding(KNOWN); RN7SKP96:misc_RNA(KNOWN); MIR4452:miRNA(KNOWN)	MAPK10: mitogen-activated protein kinase 10 (0 kb)	-0.144113	-0.194756	2.922	0.74813	0.29	0.08	0.02	7	7		NA	HSD17B11 | HSD17B13		HSD17B11 HSD17B13 MAPK10 MIR4452 RN7SKP96	MAPK10, MIR4452, RP11-778J15.1	100616463, 101929064, 5602				localization within membrane:MAPK10 | protein localization to synapse:MAPK10 | regulation of postsynaptic membrane neurotransmitter receptor levels:MAPK10		IL_1B	6.52881	6.52881	0.0703088		C	T	0.0122161	0.0122161	361	0.833	0	FALSE	0.36931	1.14195	0.262695
rs75115858:88453506:A:T	FALSE		4	4q22.1	a158	88453506	rs75115858:88453506:A:T	1	TRUE	SPARCL1 (1.3 kb, near_gene/Upstream gene/MODIFIER); NUDT9 (73 kb); DSPP (76 kb); DMP1 (120 kb)	SPARCL1:protein_coding(KNOWN); NUDT9:protein_coding(KNOWN); DSPP:protein_coding(KNOWN); DMP1:protein_coding(KNOWN)	SPARCL1: SPARC-like 1 (hevin) (1.3 kb)	-0.00689633	-0.169888	1.405	0.478273	0.35	0.38	0.5	5	5	Motifs|PWM|TFE|, Chromatin_Structure|DNase-seq|Colo829|, Chromatin_Structure|DNase-seq|Hcm|, Chromatin_Structure|DNase-seq|Hcfaa|, Chromatin_Structure|DNase-seq|Hcf|, Chromatin_Structure|DNase-seq|Hmvecdad|, Chromatin_Structure|DNase-seq|Melano|, Chromatin_Structure|DNase-seq|Hmvecdblneo|	NA	C4orf36 | HERC6 | HSD17B11 | PKD2 | PPM1K | RP11-529H2.2 | SPARCL1 | SPP1	SYCE1	C4orf36 DMP1 DSPP HERC6 HSD17B11 HSD17B13 MIR5705 NUDT9 PKD2 PPM1K RN7SL681P RP11-529H2.2 SPARCL1 SPP1 SYCE1	DSPP, NUDT9, RP11-710E1.2, SPARCL1	101929090, 1834, 53343, 8404	ECM-receptor interaction:DSPP	ECM proteoglycans:DSPP	tooth disease:DSPP | mouth disease:DSPP	cell-cell adhesion via plasma-membrane adhesion molecules:SPARCL1 | odontogenesis of dentin-containing tooth:DSPP | odontogenesis:DSPP | extracellular structure organization:DSPP		MCP_1_MCAF	6.07885	6.07885	0.0607389		T	A	0.0157384	0.0157384	388	0.976	0	FALSE	0.365433	-0.0321512	-0.332272
rs112526427:151386190:G:T	FALSE		4	4q31.3	a170	151386190	rs112526427:151386190:G:T	1	TRUE	LRBA (0 kb, intron/Intron/MODIFIER | nc-RNA/Non coding transcript/MODIFIER); MAB21L2 (120 kb); DCLK2 (210 kb)	LRBA:protein_coding(KNOWN); MAB21L2:protein_coding(KNOWN); DCLK2:protein_coding(KNOWN)	LRBA: LPS-responsive vesicle trafficking, beach and anchor containing (0 kb)	-0.633683	-0.258883	0.062	0.352247	0.36	0.15	0.08	5	5		NA	FAM160A1 | LRBA | PET112 | RP11-372K14.2		DCLK2 FAM160A1 LRBA MAB21L2 PET112 RP11-372K14.2	DCLK2, LRBA, MAB21L2	10586, 166614, 987				central nervous system neuron development:DCLK2 | forebrain neuron development:DCLK2 | forebrain neuron differentiation:DCLK2 | pallium development:DCLK2 | central nervous system neuron differentiation:DCLK2 | forebrain generation of neurons:DCLK2 | telencephalon development:DCLK2 | camera-type eye development:MAB21L2 | eye development:MAB21L2 | visual system development:MAB21L2		IL_10	6.58543	6.58543	0.0663444		T	G	0.0252044	0.0252044	387	0.842	0	FALSE	0.0114989	1.68785	1.03888
rs111878139:151490790:A:T	FALSE		4	4q31.3	a170	151490790	rs112526427:151386190:G:T	0.985914	FALSE	LRBA (0 kb, intron/Intron/MODIFIER | nc-RNA/Non coding transcript/MODIFIER); MAB21L2 (12 kb); ZBTB8OSP1 (150 kb)	LRBA:protein_coding(KNOWN); MAB21L2:protein_coding(KNOWN); ZBTB8OSP1:pseudogene(KNOWN)	LRBA: LPS-responsive vesicle trafficking, beach and anchor containing (0 kb)	1.97538	0.884534	9.678	0.891478	0.59	0.6	0.57	2c	2		NA	FAM160A1 | LRBA | PET112 | RP11-372K14.2		FAM160A1 LRBA MAB21L2 PET112 RP11-372K14.2 ZBTB8OSP1	LRBA, MAB21L2	10586, 987				camera-type eye development:MAB21L2 | eye development:MAB21L2 | visual system development:MAB21L2		IL_10	6.57628	6.57628	0.066246		T	A	0.0247894	0.0247894	387	0.836	0	FALSE	0.0197867	1.71513	1.03468
rs111374105:151312234:G:C	FALSE		4	4q31.3	a170	151312234	rs112526427:151386190:G:T	0.989058	FALSE	LRBA (0 kb, intron/Intron/MODIFIER | nc-RNA/Non coding transcript/MODIFIER); DCLK2 (130 kb); RNU7-194P (180 kb); MAB21L2 (190 kb)	LRBA:protein_coding(KNOWN); DCLK2:protein_coding(KNOWN); RNU7-194P:snRNA(KNOWN); MAB21L2:protein_coding(KNOWN)	LRBA: LPS-responsive vesicle trafficking, beach and anchor containing (0 kb)	-0.102572	-0.170277	2.782	0.701914	0.47	0.07	0.02	5	5		NA	FAM160A1 | LRBA | PET112 | RP11-372K14.2		DCLK2 FAM160A1 LRBA MAB21L2 PET112 RNU7-194P RP11-372K14.2	DCLK2, LRBA, MAB21L2	10586, 166614, 987				central nervous system neuron development:DCLK2 | forebrain neuron development:DCLK2 | forebrain neuron differentiation:DCLK2 | pallium development:DCLK2 | central nervous system neuron differentiation:DCLK2 | forebrain generation of neurons:DCLK2 | telencephalon development:DCLK2 | camera-type eye development:MAB21L2 | eye development:MAB21L2 | visual system development:MAB21L2		IL_10	6.32116	6.32116	0.0635017		C	G	0.0253141	0.0253141	387	0.862	0	FALSE	0.0148417	1.62452	1.02312
rs187028495:151192675:G:A	FALSE		4	4q31.3	a170	151192675	rs187028495:151192675:G:A	1	TRUE	LRBA (0 kb, intron/Intron/MODIFIER | nc-RNA/Non coding transcript/MODIFIER); DCLK2 (14 kb); RNU7-194P (62 kb)	LRBA:protein_coding(KNOWN); DCLK2:protein_coding(KNOWN); RNU7-194P:snRNA(KNOWN)	LRBA: LPS-responsive vesicle trafficking, beach and anchor containing (0 kb)	-0.207689	-0.198669	2.351	0.525081	0.23	0.05	0	6	6		NA			DCLK2 LRBA RNU7-194P	DCLK2, LRBA	166614, 987				central nervous system neuron development:DCLK2 | forebrain neuron development:DCLK2 | forebrain neuron differentiation:DCLK2 | pallium development:DCLK2 | central nervous system neuron differentiation:DCLK2 | forebrain generation of neurons:DCLK2 | telencephalon development:DCLK2		IL_10	6.20786	6.20786	0.0622816		A	G	0.0149069	0.0149069	387	0.881	0	FALSE	0.0985141	2.15965	1.19408
rs326150:7814593:A:G	FALSE		5	5p15.31	a180	7814593	rs141797509:7814603:TAACCCAGTTC:T	1	FALSE	ADCY2 (0 kb, intron/NMD transcript/MODIFIER | intron/Intron/MODIFIER | nc-RNA/Non coding transcript/MODIFIER); C5orf49 (16 kb); MTRR (37 kb); FASTKD3 (45 kb)	ADCY2:protein_coding(KNOWN); C5orf49:protein_coding(KNOWN); MTRR:protein_coding(KNOWN); FASTKD3:protein_coding(KNOWN)	ADCY2: adenylate cyclase 2 (brain) (0 kb)	-0.289475	-0.204301	3.333	0.292241	0.31	0.25	0.25	5	5	Chromatin_Structure|DNase-seq|Helas3|Ifna4h, Chromatin_Structure|DNase-seq|Helas3|	NA	C5orf49 | FASTKD3 | MTRR | RP11-404K5.2		ADCY2 C5orf49 FASTKD3 MTRR RNU1-76P RP11-404K5.2	ADCY2, C5orf49, FASTKD3, MTRR	108, 134121, 4552, 79072	cAMP signaling pathway:ADCY2 | Endocrine resistance:ADCY2 | Growth hormone synthesis, secretion and action:ADCY2 | Platelet activation:ADCY2 | Vascular smooth muscle contraction:ADCY2 | Oxytocin signaling pathway:ADCY2 | cGMP-PKG signaling pathway:ADCY2 | Chemokine signaling pathway:ADCY2	G alpha (i) signalling events:ADCY2 | Signaling by Hedgehog:ADCY2	prostate cancer:MTRR | male reproductive organ cancer:MTRR | myeloma:MTRR | bone marrow cancer:MTRR	cellular response to peptide hormone stimulus:ADCY2 | sulfur compound catabolic process:MTRR | cellular response to drug:ADCY2 | regulation of mRNA catabolic process:FASTKD3 | cellular response to peptide:ADCY2 | regulation of translation:FASTKD3 | response to peptide hormone:ADCY2 | regulation of cellular amide metabolic process:FASTKD3 | macromolecule methylation:MTRR | regulation of mRNA metab…		IL_10	6.49504	6.49504	0.0653728		G	A	0.0116279	0.0116279	387	1	2	FALSE	0.205507	2.39778	1.24886
rs141797509:7814603:TAACCCAGTTC:T	FALSE		5	5p15.31	a180	7814603	rs141797509:7814603:TAACCCAGTTC:T	1	TRUE	ADCY2 (0 kb); C5orf49 (16 kb); MTRR (37 kb); FASTKD3 (45 kb)	ADCY2:protein_coding(KNOWN); C5orf49:protein_coding(KNOWN); MTRR:protein_coding(KNOWN); FASTKD3:protein_coding(KNOWN)	ADCY2: adenylate cyclase 2 (brain) (0 kb)			7.746								NA	C5orf49 | FASTKD3 | MTRR | RP11-404K5.2		ADCY2 C5orf49 FASTKD3 MTRR RNU1-76P RP11-404K5.2	ADCY2, C5orf49, FASTKD3, MTRR	108, 134121, 4552, 79072	cAMP signaling pathway:ADCY2 | Endocrine resistance:ADCY2 | Growth hormone synthesis, secretion and action:ADCY2 | Platelet activation:ADCY2 | Vascular smooth muscle contraction:ADCY2 | Oxytocin signaling pathway:ADCY2 | cGMP-PKG signaling pathway:ADCY2 | Chemokine signaling pathway:ADCY2	G alpha (i) signalling events:ADCY2 | Signaling by Hedgehog:ADCY2	prostate cancer:MTRR | male reproductive organ cancer:MTRR | myeloma:MTRR | bone marrow cancer:MTRR	cellular response to peptide hormone stimulus:ADCY2 | sulfur compound catabolic process:MTRR | cellular response to drug:ADCY2 | regulation of mRNA catabolic process:FASTKD3 | cellular response to peptide:ADCY2 | regulation of translation:FASTKD3 | response to peptide hormone:ADCY2 | regulation of cellular amide metabolic process:FASTKD3 | macromolecule methylation:MTRR | regulation of mRNA metab…		IL_10	6.49504	6.49504	0.0653728		T	TAACCCAGTTC	0.0116279	0.0116279	387	0.999	0	FALSE	0.205507	2.39778	1.24886
rs6898294:7826237:C:G	FALSE		5	5p15.31	a180	7826237	rs141797509:7814603:TAACCCAGTTC:T	1	FALSE	ADCY2 (0 kb, intron/Intron/MODIFIER | nc-RNA/Non coding transcript/MODIFIER); C5orf49 (4.3 kb, near_gene/Downstream gene/MODIFIER); MTRR (25 kb); FASTKD3 (33 kb)	ADCY2:protein_coding(KNOWN); C5orf49:protein_coding(KNOWN); MTRR:protein_coding(KNOWN); FASTKD3:protein_coding(KNOWN)	ADCY2: adenylate cyclase 2 (brain) (0 kb)	-0.273007	-0.20672	1.038	0.62401	0.32	0.36	0.26	5	5	Chromatin_Structure|DNase-seq|Helas3|Ifna4h, Chromatin_Structure|DNase-seq|Helas3|, Chromatin_Structure|DNase-seq|Gm12891|	NA	C5orf49 | FASTKD3 | MTRR | RP11-404K5.2		ADCY2 C5orf49 FASTKD3 MTRR RNU1-76P RP11-404K5.2	ADCY2, C5orf49, FASTKD3, MTRR	108, 134121, 4552, 79072	cAMP signaling pathway:ADCY2 | Endocrine resistance:ADCY2 | Growth hormone synthesis, secretion and action:ADCY2 | Platelet activation:ADCY2 | Vascular smooth muscle contraction:ADCY2 | Oxytocin signaling pathway:ADCY2 | cGMP-PKG signaling pathway:ADCY2 | Chemokine signaling pathway:ADCY2	G alpha (i) signalling events:ADCY2 | Signaling by Hedgehog:ADCY2	prostate cancer:MTRR | male reproductive organ cancer:MTRR | myeloma:MTRR | bone marrow cancer:MTRR	cellular response to peptide hormone stimulus:ADCY2 | sulfur compound catabolic process:MTRR | cellular response to drug:ADCY2 | regulation of mRNA catabolic process:FASTKD3 | cellular response to peptide:ADCY2 | regulation of translation:FASTKD3 | response to peptide hormone:ADCY2 | regulation of cellular amide metabolic process:FASTKD3 | macromolecule methylation:MTRR | regulation of mRNA metab…		IL_10	6.49504	6.49504	0.0653728		G	C	0.0116279	0.0116279	387	0.992	0	FALSE	0.205507	2.39778	1.24886
rs326176:7830402:T:C	FALSE		5	5p15.31	a180	7830402	rs141797509:7814603:TAACCCAGTTC:T	1	FALSE	C5orf49 (0.089 kb, near_gene/Downstream gene/MODIFIER); ADCY2 (0.21 kb, near_gene/Downstream gene/MODIFIER); MTRR (21 kb); FASTKD3 (29 kb)	C5orf49:protein_coding(KNOWN); ADCY2:protein_coding(KNOWN); MTRR:protein_coding(KNOWN); FASTKD3:protein_coding(KNOWN)	C5orf49: chromosome 5 open reading frame 49 (0.089 kb)	-0.225331	-0.206899	0.465	0.522383	0.34	0.38	0.19	6	6	Motifs|PWM|C/EBPbeta|	NA	C5orf49 | FASTKD3 | MTRR | RP11-404K5.2		ADCY2 C5orf49 FASTKD3 MTRR RNU1-76P RP11-404K5.2	ADCY2, C5orf49, FASTKD3, MTRR	108, 134121, 4552, 79072	cAMP signaling pathway:ADCY2 | Endocrine resistance:ADCY2 | Growth hormone synthesis, secretion and action:ADCY2 | Platelet activation:ADCY2 | Vascular smooth muscle contraction:ADCY2 | Oxytocin signaling pathway:ADCY2 | cGMP-PKG signaling pathway:ADCY2 | Chemokine signaling pathway:ADCY2	G alpha (i) signalling events:ADCY2 | Signaling by Hedgehog:ADCY2	prostate cancer:MTRR | male reproductive organ cancer:MTRR | myeloma:MTRR | bone marrow cancer:MTRR	cellular response to peptide hormone stimulus:ADCY2 | sulfur compound catabolic process:MTRR | cellular response to drug:ADCY2 | regulation of mRNA catabolic process:FASTKD3 | cellular response to peptide:ADCY2 | regulation of translation:FASTKD3 | response to peptide hormone:ADCY2 | regulation of cellular amide metabolic process:FASTKD3 | macromolecule methylation:MTRR | regulation of mRNA metab…		IL_10	6.49504	6.49504	0.0653728		C	T	0.0116279	0.0116279	387	0.997	0	FALSE	0.205507	2.39778	1.24886
rs326177:7830825:G:A	FALSE		5	5p15.31	a180	7830825	rs141797509:7814603:TAACCCAGTTC:T	1	FALSE	C5orf49 (0 kb, 3'utr/3 prime UTR/MODIFIER | near_gene/Downstream gene/MODIFIER); ADCY2 (0.63 kb, near_gene/Downstream gene/MODIFIER); MTRR (20 kb); FASTKD3 (28 kb)	C5orf49:protein_coding(KNOWN); ADCY2:protein_coding(KNOWN); MTRR:protein_coding(KNOWN); FASTKD3:protein_coding(KNOWN)	C5orf49: chromosome 5 open reading frame 49 (0 kb)	-0.0531361	-0.191761	2.497	0.603836	0.29	0.77	0.76	6	6	Motifs|PWM|ZID|	NA	C5orf49 | FASTKD3 | MTRR | RP11-404K5.2		ADCY2 C5orf49 FASTKD3 MTRR RNU1-76P RP11-404K5.2	ADCY2, C5orf49, FASTKD3, MTRR	108, 134121, 4552, 79072	cAMP signaling pathway:ADCY2 | Endocrine resistance:ADCY2 | Growth hormone synthesis, secretion and action:ADCY2 | Platelet activation:ADCY2 | Vascular smooth muscle contraction:ADCY2 | Oxytocin signaling pathway:ADCY2 | cGMP-PKG signaling pathway:ADCY2 | Chemokine signaling pathway:ADCY2	G alpha (i) signalling events:ADCY2 | Signaling by Hedgehog:ADCY2	prostate cancer:MTRR | male reproductive organ cancer:MTRR | myeloma:MTRR | bone marrow cancer:MTRR	cellular response to peptide hormone stimulus:ADCY2 | sulfur compound catabolic process:MTRR | cellular response to drug:ADCY2 | regulation of mRNA catabolic process:FASTKD3 | cellular response to peptide:ADCY2 | regulation of translation:FASTKD3 | response to peptide hormone:ADCY2 | regulation of cellular amide metabolic process:FASTKD3 | macromolecule methylation:MTRR | regulation of mRNA metab…		IL_10	6.49504	6.49504	0.0653728		A	G	0.0116279	0.0116279	387	0.997	0	FALSE	0.205507	2.39778	1.24886
rs326179:7831460:A:G	FALSE		5	5p15.31	a180	7831460	rs141797509:7814603:TAACCCAGTTC:T	1	FALSE	C5orf49 (0 kb, 3'utr/3 prime UTR/MODIFIER | near_gene/Downstream gene/MODIFIER); ADCY2 (1.3 kb, near_gene/Downstream gene/MODIFIER); MTRR (20 kb); FASTKD3 (28 kb)	C5orf49:protein_coding(KNOWN); ADCY2:protein_coding(KNOWN); MTRR:protein_coding(KNOWN); FASTKD3:protein_coding(KNOWN)	C5orf49: chromosome 5 open reading frame 49 (0 kb)	-0.142511	-0.195104	3.909	0.746656	0.35	0.92	0.84	5	5	Chromatin_Structure|DNase-seq|Gm18507|, Chromatin_Structure|DNase-seq|Helas3|, Chromatin_Structure|DNase-seq|Helas3|Ifna4h	NA	C5orf49 | FASTKD3 | MTRR | RP11-404K5.2		ADCY2 C5orf49 FASTKD3 MTRR RNU1-76P RP11-404K5.2	ADCY2, C5orf49, FASTKD3, MTRR	108, 134121, 4552, 79072	cAMP signaling pathway:ADCY2 | Endocrine resistance:ADCY2 | Growth hormone synthesis, secretion and action:ADCY2 | Platelet activation:ADCY2 | Vascular smooth muscle contraction:ADCY2 | Oxytocin signaling pathway:ADCY2 | cGMP-PKG signaling pathway:ADCY2 | Chemokine signaling pathway:ADCY2	G alpha (i) signalling events:ADCY2 | Signaling by Hedgehog:ADCY2	prostate cancer:MTRR | male reproductive organ cancer:MTRR | myeloma:MTRR | bone marrow cancer:MTRR	cellular response to peptide hormone stimulus:ADCY2 | sulfur compound catabolic process:MTRR | cellular response to drug:ADCY2 | regulation of mRNA catabolic process:FASTKD3 | cellular response to peptide:ADCY2 | regulation of translation:FASTKD3 | response to peptide hormone:ADCY2 | regulation of cellular amide metabolic process:FASTKD3 | macromolecule methylation:MTRR | regulation of mRNA metab…		IL_10	6.49504	6.49504	0.0653728		G	A	0.0116279	0.0116279	387	1	2	FALSE	0.205507	2.39778	1.24886
rs326183:7833081:G:A	FALSE		5	5p15.31	a180	7833081	rs141797509:7814603:TAACCCAGTTC:T	0.998745	FALSE	C5orf49 (0 kb, intron/Intron/MODIFIER); ADCY2 (2.9 kb, near_gene/Downstream gene/MODIFIER); MTRR (18 kb); FASTKD3 (26 kb)	C5orf49:protein_coding(KNOWN); ADCY2:protein_coding(KNOWN); MTRR:protein_coding(KNOWN); FASTKD3:protein_coding(KNOWN)	C5orf49: chromosome 5 open reading frame 49 (0 kb)	-0.0689696	-0.18115	1.385	0.56597	0.28	0.26	0.18	5	5	Motifs|PWM|GR|, Motifs|PWM|Gm397|, Chromatin_Structure|DNase-seq|Helas3|, Chromatin_Structure|DNase-seq|Helas3|Ifna4h	NA	C5orf49 | FASTKD3 | MTRR | RP11-404K5.2		ADCY2 C5orf49 FASTKD3 MTRR RNU1-76P RP11-404K5.2	ADCY2, C5orf49, FASTKD3, MTRR	108, 134121, 4552, 79072	cAMP signaling pathway:ADCY2 | Endocrine resistance:ADCY2 | Growth hormone synthesis, secretion and action:ADCY2 | Platelet activation:ADCY2 | Vascular smooth muscle contraction:ADCY2 | Oxytocin signaling pathway:ADCY2 | cGMP-PKG signaling pathway:ADCY2 | Chemokine signaling pathway:ADCY2	G alpha (i) signalling events:ADCY2 | Signaling by Hedgehog:ADCY2	prostate cancer:MTRR | male reproductive organ cancer:MTRR | myeloma:MTRR | bone marrow cancer:MTRR	cellular response to peptide hormone stimulus:ADCY2 | sulfur compound catabolic process:MTRR | cellular response to drug:ADCY2 | regulation of mRNA catabolic process:FASTKD3 | cellular response to peptide:ADCY2 | regulation of translation:FASTKD3 | response to peptide hormone:ADCY2 | regulation of cellular amide metabolic process:FASTKD3 | macromolecule methylation:MTRR | regulation of mRNA metab…		IL_10	6.3427	6.3427	0.0637337		A	G	0.011473	0.011473	387	0.993	0	FALSE	0.19755	2.39828	1.22356
rs326185:7834527:T:C	FALSE		5	5p15.31	a180	7834527	rs141797509:7814603:TAACCCAGTTC:T	0.998558	FALSE	C5orf49 (0 kb, intron/Intron/MODIFIER); ADCY2 (4.3 kb, near_gene/Downstream gene/MODIFIER); MTRR (17 kb); FASTKD3 (25 kb)	C5orf49:protein_coding(KNOWN); ADCY2:protein_coding(KNOWN); MTRR:protein_coding(KNOWN); FASTKD3:protein_coding(KNOWN)	C5orf49: chromosome 5 open reading frame 49 (0 kb)	-0.211765	-0.20024	1.103	0.650629	0.24	0.05	0.05	6	6	Motifs|PWM|HOXC11|, Motifs|PWM|Cdx1|, Motifs|PWM|Cdx2|, Motifs|PWM|Hoxa11|, Motifs|PWM|Hoxc10|, Motifs|PWM|Hoxc11|, Motifs|PWM|Hoxd11|, Motifs|PWM|Hoxd12|, Motifs|PWM|Hoxb9|, Motifs|PWM|hoxa9|, Motifs|PWM|Hoxa9|, Motifs|PWM|Cdx-2|, Motifs|PWM|Oct-1|	NA	C5orf49 | FASTKD3 | MTRR | RP11-404K5.2		ADCY2 C5orf49 FASTKD3 MTRR RNU1-76P RP11-404K5.2	ADCY2, C5orf49, FASTKD3, MTRR	108, 134121, 4552, 79072	cAMP signaling pathway:ADCY2 | Endocrine resistance:ADCY2 | Growth hormone synthesis, secretion and action:ADCY2 | Platelet activation:ADCY2 | Vascular smooth muscle contraction:ADCY2 | Oxytocin signaling pathway:ADCY2 | cGMP-PKG signaling pathway:ADCY2 | Chemokine signaling pathway:ADCY2	G alpha (i) signalling events:ADCY2 | Signaling by Hedgehog:ADCY2	prostate cancer:MTRR | male reproductive organ cancer:MTRR | myeloma:MTRR | bone marrow cancer:MTRR	cellular response to peptide hormone stimulus:ADCY2 | sulfur compound catabolic process:MTRR | cellular response to drug:ADCY2 | regulation of mRNA catabolic process:FASTKD3 | cellular response to peptide:ADCY2 | regulation of translation:FASTKD3 | response to peptide hormone:ADCY2 | regulation of cellular amide metabolic process:FASTKD3 | macromolecule methylation:MTRR | regulation of mRNA metab…		IL_10	6.32798	6.32798	0.0635755		C	T	0.0114599	0.0114599	387	0.992	0	FALSE	0.197075	2.39781	1.22138
rs326164:7820586:G:A	FALSE		5	5p15.31	a180	7820586	rs141797509:7814603:TAACCCAGTTC:T	0.99376	FALSE	ADCY2 (0 kb, intron/NMD transcript/MODIFIER | intron/Intron/MODIFIER | nc-RNA/Non coding transcript/MODIFIER | near_gene/Downstream gene/MODIFIER); C5orf49 (9.9 kb); MTRR (31 kb); FASTKD3 (39 kb)	ADCY2:protein_coding(KNOWN); C5orf49:protein_coding(KNOWN); MTRR:protein_coding(KNOWN); FASTKD3:protein_coding(KNOWN)	ADCY2: adenylate cyclase 2 (brain) (0 kb)	-0.334099	-0.222564	1.561	0.565358	0.48	0.16	0.02	7	7		NA	C5orf49 | FASTKD3 | MTRR | RP11-404K5.2		ADCY2 C5orf49 FASTKD3 MTRR RNU1-76P RP11-404K5.2	ADCY2, C5orf49, FASTKD3, MTRR	108, 134121, 4552, 79072	cAMP signaling pathway:ADCY2 | Endocrine resistance:ADCY2 | Growth hormone synthesis, secretion and action:ADCY2 | Platelet activation:ADCY2 | Vascular smooth muscle contraction:ADCY2 | Oxytocin signaling pathway:ADCY2 | cGMP-PKG signaling pathway:ADCY2 | Chemokine signaling pathway:ADCY2	G alpha (i) signalling events:ADCY2 | Signaling by Hedgehog:ADCY2	prostate cancer:MTRR | male reproductive organ cancer:MTRR | myeloma:MTRR | bone marrow cancer:MTRR	cellular response to peptide hormone stimulus:ADCY2 | sulfur compound catabolic process:MTRR | cellular response to drug:ADCY2 | regulation of mRNA catabolic process:FASTKD3 | cellular response to peptide:ADCY2 | regulation of translation:FASTKD3 | response to peptide hormone:ADCY2 | regulation of cellular amide metabolic process:FASTKD3 | macromolecule methylation:MTRR | regulation of mRNA metab…		IL_10	6.22823	6.22823	0.0625012		A	G	0.0120982	0.0120982	387	0.985	0	FALSE	0.205082	2.33947	1.21684
rs326162:7819850:A:C	FALSE		5	5p15.31	a180	7819850	rs141797509:7814603:TAACCCAGTTC:T	0.987756	FALSE	ADCY2 (0 kb, intron/NMD transcript/MODIFIER | intron/Intron/MODIFIER | nc-RNA/Non coding transcript/MODIFIER | near_gene/Downstream gene/MODIFIER); C5orf49 (11 kb); MTRR (31 kb); FASTKD3 (39 kb)	ADCY2:protein_coding(KNOWN); C5orf49:protein_coding(KNOWN); MTRR:protein_coding(KNOWN); FASTKD3:protein_coding(KNOWN)	ADCY2: adenylate cyclase 2 (brain) (0 kb)	-0.217746	-0.198753	0.245	0.453621	0.38	0.35	0.27	5	5	Chromatin_Structure|DNase-seq|Fibrobl|	NA	C5orf49 | FASTKD3 | MTRR | RP11-404K5.2		ADCY2 C5orf49 FASTKD3 MTRR RNU1-76P RP11-404K5.2	ADCY2, C5orf49, FASTKD3, MTRR	108, 134121, 4552, 79072	cAMP signaling pathway:ADCY2 | Endocrine resistance:ADCY2 | Growth hormone synthesis, secretion and action:ADCY2 | Platelet activation:ADCY2 | Vascular smooth muscle contraction:ADCY2 | Oxytocin signaling pathway:ADCY2 | cGMP-PKG signaling pathway:ADCY2 | Chemokine signaling pathway:ADCY2	G alpha (i) signalling events:ADCY2 | Signaling by Hedgehog:ADCY2	prostate cancer:MTRR | male reproductive organ cancer:MTRR | myeloma:MTRR | bone marrow cancer:MTRR	cellular response to peptide hormone stimulus:ADCY2 | sulfur compound catabolic process:MTRR | cellular response to drug:ADCY2 | regulation of mRNA catabolic process:FASTKD3 | cellular response to peptide:ADCY2 | regulation of translation:FASTKD3 | response to peptide hormone:ADCY2 | regulation of cellular amide metabolic process:FASTKD3 | macromolecule methylation:MTRR | regulation of mRNA metab…		IL_10	6.10199	6.10199	0.0611411		C	A	0.0122802	0.0122802	387	0.984	0	FALSE	0.204493	2.30774	1.20077
rs326153:7815809:T:C	FALSE		5	5p15.31	a180	7815809	rs141797509:7814603:TAACCCAGTTC:T	0.98725	FALSE	ADCY2 (0 kb, intron/NMD transcript/MODIFIER | intron/Intron/MODIFIER | nc-RNA/Non coding transcript/MODIFIER); C5orf49 (15 kb); MTRR (35 kb); FASTKD3 (43 kb)	ADCY2:protein_coding(KNOWN); C5orf49:protein_coding(KNOWN); MTRR:protein_coding(KNOWN); FASTKD3:protein_coding(KNOWN)	ADCY2: adenylate cyclase 2 (brain) (0 kb)	0.0802743	-0.137144	2.687	0.586596	0.36	0.46	0.34	5	5	Motifs|PWM|Gabpa|, Chromatin_Structure|DNase-seq|Gm19240|	NA	C5orf49 | FASTKD3 | MTRR | RP11-404K5.2		ADCY2 C5orf49 FASTKD3 MTRR RNU1-76P RP11-404K5.2	ADCY2, C5orf49, FASTKD3, MTRR	108, 134121, 4552, 79072	cAMP signaling pathway:ADCY2 | Endocrine resistance:ADCY2 | Growth hormone synthesis, secretion and action:ADCY2 | Platelet activation:ADCY2 | Vascular smooth muscle contraction:ADCY2 | Oxytocin signaling pathway:ADCY2 | cGMP-PKG signaling pathway:ADCY2 | Chemokine signaling pathway:ADCY2	G alpha (i) signalling events:ADCY2 | Signaling by Hedgehog:ADCY2	prostate cancer:MTRR | male reproductive organ cancer:MTRR | myeloma:MTRR | bone marrow cancer:MTRR	cellular response to peptide hormone stimulus:ADCY2 | sulfur compound catabolic process:MTRR | cellular response to drug:ADCY2 | regulation of mRNA catabolic process:FASTKD3 | cellular response to peptide:ADCY2 | regulation of translation:FASTKD3 | response to peptide hormone:ADCY2 | regulation of cellular amide metabolic process:FASTKD3 | macromolecule methylation:MTRR | regulation of mRNA metab…		IL_10	6.04986	6.04986	0.0605789		C	T	0.012075	0.012075	387	0.988	0	FALSE	0.205251	2.29555	1.19836
rs326151:7814644:C:T	FALSE		5	5p15.31	a180	7814644	rs141797509:7814603:TAACCCAGTTC:T	0.985072	FALSE	ADCY2 (0 kb, intron/NMD transcript/MODIFIER | intron/Intron/MODIFIER | nc-RNA/Non coding transcript/MODIFIER); C5orf49 (16 kb); MTRR (37 kb); FASTKD3 (45 kb)	ADCY2:protein_coding(KNOWN); C5orf49:protein_coding(KNOWN); MTRR:protein_coding(KNOWN); FASTKD3:protein_coding(KNOWN)	ADCY2: adenylate cyclase 2 (brain) (0 kb)	-0.816298	-0.281378	0.553	0.394168	0.32	0.33	0.14	5	5	Chromatin_Structure|DNase-seq|Helas3|Ifna4h, Chromatin_Structure|DNase-seq|Helas3|	NA	C5orf49 | FASTKD3 | MTRR | RP11-404K5.2		ADCY2 C5orf49 FASTKD3 MTRR RNU1-76P RP11-404K5.2	ADCY2, C5orf49, FASTKD3, MTRR	108, 134121, 4552, 79072	cAMP signaling pathway:ADCY2 | Endocrine resistance:ADCY2 | Growth hormone synthesis, secretion and action:ADCY2 | Platelet activation:ADCY2 | Vascular smooth muscle contraction:ADCY2 | Oxytocin signaling pathway:ADCY2 | cGMP-PKG signaling pathway:ADCY2 | Chemokine signaling pathway:ADCY2	G alpha (i) signalling events:ADCY2 | Signaling by Hedgehog:ADCY2	prostate cancer:MTRR | male reproductive organ cancer:MTRR | myeloma:MTRR | bone marrow cancer:MTRR	cellular response to peptide hormone stimulus:ADCY2 | sulfur compound catabolic process:MTRR | cellular response to drug:ADCY2 | regulation of mRNA catabolic process:FASTKD3 | cellular response to peptide:ADCY2 | regulation of translation:FASTKD3 | response to peptide hormone:ADCY2 | regulation of cellular amide metabolic process:FASTKD3 | macromolecule methylation:MTRR | regulation of mRNA metab…		IL_10	6.00174	6.00174	0.06006		T	C	0.0121215	0.0121215	387	0.991	0	FALSE	0.205098	2.2834	1.19135
rs201739663:10497978:GAC:G	FALSE		5	5p15.2	a181	10497978	rs201739663:10497978:GAC:G	1	TRUE	RPL30P7 (8.7 kb); ROPN1L (26 kb); ROPN1L-AS1 (56 kb); MARCH6 (57 kb)	RPL30P7:pseudogene(KNOWN); ROPN1L:protein_coding(KNOWN); ROPN1L-AS1:antisense(KNOWN); MARCH6:protein_coding(KNOWN)	RPL30P7: ribosomal protein L30 pseudogene 7 (8.7 kb)			1.468								NA	- | CMBL | MARCH6		- ANKRD33B ANKRD33B-AS1 CCT5 CMBL DAP FAM173B MARCH6 ROPN1L ROPN1L-AS1 RPL30P7	MARCH6, ROPN1L, ROPN1L-AS1, RP11-1C1.4	100505845, 101929412, 10299, 83853					Tissues; Epithelium:ROPN1L	MIP_1A	6.01773	6.01773	0.063081		G	GAC	0.0266478	0.0266478	369	0.844	0	FALSE	-0.0313183	0.875724	0.289472
rs115911870:40977136:G:C	FALSE		5	5p13.1	a187	40977136	rs115911870:40977136:G:C	1	TRUE	C7 (0 kb, intron/Intron/MODIFIER | nc-RNA/Non coding transcript/MODIFIER | near_gene/Downstream gene/MODIFIER); MROH2B (21 kb); RNU7-161P (66 kb); CARD6 (120 kb)	C7:protein_coding(KNOWN); MROH2B:protein_coding(KNOWN); RNU7-161P:snRNA(KNOWN); CARD6:protein_coding(KNOWN)	C7: complement component 7 (0 kb)	0.41242	-0.00328533	2.632	0.466006	0.4	0.34	0.55	3a	3		NA	C5orf51 | PTGER4		C5orf51 C6 C7 CARD6 MROH2B PRKAA1 PTGER4 RNU7-161P RPL37 SNORD72 TTC33	C7, CARD6, MROH2B, RPL37	133558, 6167, 730, 84674				protein kinase A signaling:MROH2B | regulation of immune effector process:C7		IL_1B	6.02849	6.02849	0.064559		C	G	0.0173711	0.0173711	361	0.916	0	FALSE	0.363388	1.00833	0.116751
rs184383355:73128730:G:A	FALSE		5	5q13.2	a193	73128730	rs184383355:73128730:G:A	1	TRUE	ARHGEF28 (0 kb, intron/Intron/MODIFIER | near_gene/Upstream gene/MODIFIER); RNU7-196P (4.8 kb, near_gene/Upstream gene/MODIFIER)	ARHGEF28:protein_coding(KNOWN); RNU7-196P:snRNA(KNOWN)	ARHGEF28: Rho guanine nucleotide exchange factor (GEF) 28 (0 kb)	-0.318686	-0.110527	0.278	0.70767	0.34	0.16	0.16	5	5		NA	ANKRA2 | GFM2	GUCA1C | LRTM1 | SLC5A7	ANKRA2 ARHGEF28 GFM2 GUCA1C LRTM1 RNU7-196P SLC5A7	ANKRA2, ARHGEF28	57763, 64283						IL_1B	6.1942	6.1942	0.0664648		A	G	0.0151662	0.0151662	361	0.987	0	FALSE	0.342038	0.485017	0.581107
rs114173198:136039749:T:C	FALSE		5	5q31.1	a206	136039749	rs114173198:136039749:T:C	1	TRUE				-0.214905	-0.129576	4.763	0.853526	0.42	0.25	0.02	5	5		NA											IL_8	6.07503	6.07503	0.0616232		C	T	0.0115368	0.0115368	382	0.817	0	FALSE	0.50404	1.05252	-0.247399
rs201748638:137744088:AAAAAG:A	FALSE		5	5q31.2	a207	137744088	rs201748638:137744088:AAAAAG:A	1	TRUE	KDM3B (0 kb); REEP2 (31 kb); EGR1 (57 kb); FAM53C (59 kb)	KDM3B:protein_coding(KNOWN); REEP2:protein_coding(KNOWN); EGR1:protein_coding(KNOWN); FAM53C:protein_coding(KNOWN)	KDM3B: lysine (K)-specific demethylase 3B (0 kb)			0.504								NA	CTNNA1 | FAM13B | FAM53C | HNRNPA0 | HSPA9 | KDM3B | KLHL3 | REEP2 | SIL1		BRD8 CDC23 CDC25C CTN1 CTNNA1 EGR1 ETF1 FAM13B FAM53C GFRA3 HNRNPA0 HSPA9 KDM3B KIF20A KLHL3 REEP2 RN7SL682P RPL7P19 SIL1 SNORD63	CTNNA1, EGR1, FAM53C, HNRNPA0, KDM3B, REEP2	10949, 1495, 1958, 51307, 51308, 51780		Cell-Cell communication:CTNNA1 | Signaling by Receptor Tyrosine Kinases:CTNNA1	hereditary Wilms' tumor:EGR1 | nephroblastoma:EGR1 | kidney cancer:EGR1	metanephric glomerulus development:EGR1 | metanephros development:EGR1 | response to antineoplastic agent:CTNNA1,EGR1,KDM3B | metanephric nephron development:EGR1 | glomerulus development:EGR1 | odontogenesis of dentin-containing tooth:CTNNA1 | kidney development:EGR1 | renal system development:EGR1 | urogenital system development:EGR1 | odontogenesis:CTNNA1 | nephron development:EGR1 | regulatio…		MCP_1_MCAF	6.43461	6.43461	0.0645614		A	AAAAAG	0.0234406	0.0234406	388	0.845	0	FALSE	0.233077	0.473531	-0.44874
rs139243027:151039986:C:T	FALSE		5	5q33.1	a209	151039986	rs139243027:151039986:C:T	1	TRUE	SPARC (0.67 kb, near_gene/Downstream gene/MODIFIER); CTB-113P19.4 (5 kb, near_gene/Downstream gene/MODIFIER); RN7SKP232 (44 kb); ATOX1 (82 kb)	SPARC:protein_coding(KNOWN); CTB-113P19.4:antisense(KNOWN); RN7SKP232:misc_RNA(KNOWN); ATOX1:protein_coding(KNOWN)	SPARC: secreted protein, acidic, cysteine-rich (osteonectin) (0.67 kb)	-0.320042	-0.189291	3.38	0.581034	0.18	0.11	0.13	7	7		NA	ATOX1 | DCTN4 | SPARC		ATOX1 CTB-113P19.4 DCTN4 FAT2 G3BP1 GLRA1 RN7SKP232 RNA5SP197 RNA5SP198 SLC36A1 SPARC	ATOX1, CTB-113P19.1, FAT2, SPARC	101927096, 2196, 475, 6678		ECM proteoglycans:SPARC | Signaling by Receptor Tyrosine Kinases:SPARC	tooth disease:SPARC | mouth disease:SPARC	cell-cell adhesion via plasma-membrane adhesion molecules:FAT2 | epithelial cell migration:FAT2,SPARC | epithelium migration:FAT2,SPARC | positive regulation of endothelial cell migration:SPARC | tissue migration:FAT2,SPARC | response to glucocorticoid:SPARC | response to corticosteroid:SPARC | extracellular structure organization:SPARC | regulation of vasculature development:SPARC | homophilic c…		MCP_1_MCAF	6.49744	6.49744	0.0652355		T	C	0.0715054	0.0715054	388	0.878	0	FALSE	0.119822	0.641638	0.290359
rs17715887:158284985:C:T	FALSE		5	5q33.3	a211	158284985	rs17715887:158284985:C:T	1	TRUE	EBF1 (0 kb, intron/Intron/MODIFIER | nc-RNA/Non coding transcript/MODIFIER)	EBF1:protein_coding(KNOWN)	EBF1: early B-cell factor 1 (0 kb)	0.874991	-0.028463	15.15	0.532159	0.57	0.32	0.28	6	6	Motifs|PWM|Hnf4a|, Motifs|PWM|RARG|, Motifs|PWM|RARG|	NA	UBLCP1	PAH	EBF1 PAH UBLCP1	EBF1, RP11-175K6.1	101927740, 1879						ICAM_1	6.09106	6.09106	0.0607186		T	C	0.0491171	0.0491171	389	0.982	0	FALSE	-0.384706	-0.409072	-0.137865
rs115617098:37178147:A:G	FALSE		6	6p21.2	a223	37178147	rs115617098:37178147:A:G	1	TRUE	TMEM217 (1.8 kb, near_gene/Downstream gene/MODIFIER); PIM1 (35 kb); TBC1D22B (47 kb); RPL12P2 (120 kb)	TMEM217:protein_coding(KNOWN); PIM1:protein_coding(KNOWN); TBC1D22B:protein_coding(KNOWN); RPL12P2:pseudogene(KNOWN)	TMEM217: transmembrane protein 217 (1.8 kb)	-0.138093	0.368161	2.341	0.623061	0.35	0.54	0.41	4	4		NA	CCDC167 | ETV7 | FGD2 | MDGA1 | PI16 | PIM1 | ZFAND3		CCDC167 CMTR1 COX6A1P2 ETV7 FGD2 MDGA1 MTCH1 PI16 PIM1 RN7SL273P RNF8 RPL12P2 TBC1D22B TMEM217 ZFAND3	CCDC167, FGD2, MDGA1, PIM1, RNF8, TBC1D22B, TMEM217	154467, 221468, 221472, 266727, 5292, 55633, 9025			autosomal dominant disease:RNF8 | hereditary breast ovarian cancer:RNF8	histone H2B ubiquitination:RNF8 | cellular response to vitamin D:PIM1 | cellular response to vitamin:PIM1 | response to vitamin D:PIM1 | histone ubiquitination:RNF8 | positive regulation of DNA repair:RNF8 | cellular response to nutrient:PIM1 | histone H2A ubiquitination:RNF8 | synaptic membrane adhesion:MDGA1 | double-strand break repair via nonhomologous end joining:RNF8 | regulation of presyna…		IL_1B	6.34	6.34	0.068141		G	A	0.0186309	0.0186309	361	0.92	0	FALSE	0.0674883	1.13813	0.149778
rs7763440:43926708:G:A	FALSE		6	6p21.1	a224	43926708	rs7763440:43926708:G:A	1	TRUE	C6orf223 (42 kb); MRPL14 (150 kb); TMEM63B (170 kb); VEGFA (170 kb)	C6orf223:protein_coding(KNOWN); MRPL14:protein_coding(KNOWN); TMEM63B:protein_coding(KNOWN); VEGFA:protein_coding(KNOWN)	C6orf223: chromosome 6 open reading frame 223 (42 kb)	-0.0921826	-0.161324	0.849	0.370472	0.19	0.12	0.06	6	6	Motifs|PWM|Elk-1|, Motifs|PWM|c-Ets-2|, Motifs|PWM|ELF5|, Motifs|PWM|Tel-2|, Motifs|PWM|Ets|, Chromatin_Structure|FAIRE|Astrocy|	1 Vascular endothelial growth factor levels // 0.988 Vascular endothelial growth factor levels in major depressive disorder // 0.844 Blood protein levels	CAPN11 | HSP90AB1 | MRPL14 | RSPH9 | SLC29A1 | SLC35B2		C6orf223 CAPN11 HSP90AB1 MRPL14 RSPH9 SLC29A1 SLC35B2 TMEM63B VEGFA	C6orf223, CAPN11, MRPL14, RP5-1120P11.1, RP5-1120P11.3, SLC35B2	100616124, 101929683, 101929705, 11131, 221416, 347734, 64928	Ribosome:MRPL14	Glycosaminoglycan metabolism:SLC35B2 | Mitochondrial translation initiation:MRPL14 | Mitochondrial translation elongation:MRPL14 | Mitochondrial translation termination:MRPL14 | Metabolism of carbohydrates:SLC35B2 | Mitochondrial translation:MRPL14 | Extracellular matrix organization:CAPN11		sulfur compound transport:SLC35B2 | positive regulation of I-kappaB kinase/NF-kappaB signaling:SLC35B2 | sulfur compound biosynthetic process:SLC35B2 | regulation of I-kappaB kinase/NF-kappaB signaling:SLC35B2 | I-kappaB kinase/NF-kappaB signaling:SLC35B2 | mitochondrial translational elongation:MRPL14 | mitochondrial translational termination:MRPL14 | protein-containing complex disassembly:MRPL14		VEGF	19.8026	19.8026	0.199669		A	G	0.44602	0.44602	388	0.994	0	FALSE	-0.0360747	-0.347162	-0.532113
rs7767396:43927050:A:G	FALSE		6	6p21.1	a224	43927050	rs7763440:43926708:G:A	0.995303	FALSE	C6orf223 (41 kb); MRPL14 (150 kb); TMEM63B (170 kb); VEGFA (170 kb)	C6orf223:protein_coding(KNOWN); MRPL14:protein_coding(KNOWN); TMEM63B:protein_coding(KNOWN); VEGFA:protein_coding(KNOWN)	C6orf223: chromosome 6 open reading frame 223 (41 kb)	-0.678491	-0.255487	1.324	0.345543	0.24	0.14	0.03	6	6	Single_Nucleotides|eQTL|CUL9|Lymphoblastoid|cis	0.996 Vascular endothelial growth factor levels in major depressive disorder // 0.992 Vascular endothelial growth factor levels // 0.829 Blood protein levels	CAPN11 | HSP90AB1 | MRPL14 | RSPH9 | SLC29A1 | SLC35B2		C6orf223 CAPN11 HSP90AB1 MRPL14 RSPH9 SLC29A1 SLC35B2 TMEM63B VEGFA	C6orf223, CAPN11, MRPL14, RP5-1120P11.1, RP5-1120P11.3, SLC35B2	100616124, 101929683, 101929705, 11131, 221416, 347734, 64928	Ribosome:MRPL14	Glycosaminoglycan metabolism:SLC35B2 | Mitochondrial translation initiation:MRPL14 | Mitochondrial translation elongation:MRPL14 | Mitochondrial translation termination:MRPL14 | Metabolism of carbohydrates:SLC35B2 | Mitochondrial translation:MRPL14 | Extracellular matrix organization:CAPN11		sulfur compound transport:SLC35B2 | positive regulation of I-kappaB kinase/NF-kappaB signaling:SLC35B2 | sulfur compound biosynthetic process:SLC35B2 | regulation of I-kappaB kinase/NF-kappaB signaling:SLC35B2 | I-kappaB kinase/NF-kappaB signaling:SLC35B2 | mitochondrial translational elongation:MRPL14 | mitochondrial translational termination:MRPL14 | protein-containing complex disassembly:MRPL14		VEGF	19.7916	19.7916	0.199564		G	A	0.447165	0.447165	388	1	2	FALSE	-0.0363299	-0.345912	-0.530234
rs12205248:43926219:T:C	FALSE		6	6p21.1	a224	43926219	rs7763440:43926708:G:A	0.999902	FALSE	C6orf223 (42 kb); MRPL14 (150 kb); TMEM63B (170 kb); VEGFA (170 kb)	C6orf223:protein_coding(KNOWN); MRPL14:protein_coding(KNOWN); TMEM63B:protein_coding(KNOWN); VEGFA:protein_coding(KNOWN)	C6orf223: chromosome 6 open reading frame 223 (42 kb)	0.0463672	0.00421103	9.365	0.784013	0.4	0.23	0.18	4	4	Chromatin_Structure|DNase-seq|Hmveclbl|, Chromatin_Structure|DNase-seq|Hmvecdblneo|, Chromatin_Structure|DNase-seq|Hmvecdblad|, Protein_Binding|ChIP-seq|FOXA1|HepG2|, Protein_Binding|ChIP-seq|FOXA1|HepG2|, Protein_Binding|ChIP-seq|FOXA2|HepG2|	1 Vascular endothelial growth factor levels // 0.988 Vascular endothelial growth factor levels in major depressive disorder // 0.844 Blood protein levels	CAPN11 | HSP90AB1 | MRPL14 | RSPH9 | SLC29A1 | SLC35B2		C6orf223 CAPN11 HSP90AB1 MRPL14 RSPH9 SLC29A1 SLC35B2 TMEM63B VEGFA	C6orf223, CAPN11, MRPL14, RP5-1120P11.1, RP5-1120P11.3, SLC35B2	100616124, 101929683, 101929705, 11131, 221416, 347734, 64928	Ribosome:MRPL14	Glycosaminoglycan metabolism:SLC35B2 | Mitochondrial translation initiation:MRPL14 | Mitochondrial translation elongation:MRPL14 | Mitochondrial translation termination:MRPL14 | Metabolism of carbohydrates:SLC35B2 | Mitochondrial translation:MRPL14 | Extracellular matrix organization:CAPN11		sulfur compound transport:SLC35B2 | positive regulation of I-kappaB kinase/NF-kappaB signaling:SLC35B2 | sulfur compound biosynthetic process:SLC35B2 | regulation of I-kappaB kinase/NF-kappaB signaling:SLC35B2 | I-kappaB kinase/NF-kappaB signaling:SLC35B2 | mitochondrial translational elongation:MRPL14 | mitochondrial translational termination:MRPL14 | protein-containing complex disassembly:MRPL14		VEGF	19.6959	19.6959	0.198664		C	T	0.446517	0.446517	388	0.989	0	FALSE	-0.0358182	-0.347971	-0.531989
rs13206436:43925778:G:A	FALSE		6	6p21.1	a224	43925778	rs7763440:43926708:G:A	0.999644	FALSE	C6orf223 (43 kb); MRPL14 (160 kb); TMEM63B (170 kb); VEGFA (170 kb)	C6orf223:protein_coding(KNOWN); MRPL14:protein_coding(KNOWN); TMEM63B:protein_coding(KNOWN); VEGFA:protein_coding(KNOWN)	C6orf223: chromosome 6 open reading frame 223 (43 kb)	-0.699519	-0.265751	0.06	0.116945	0.2	0.11	0.02	6	6	Motifs|PWM|C/EBPdelta|, Motifs|PWM|Dlx1|, Motifs|PWM|Hoxc8|, Motifs|PWM|Dlx2|, Motifs|PWM|HOXC-8|, Motifs|PWM|Meox1|	1 Vascular endothelial growth factor levels // 0.988 Vascular endothelial growth factor levels in major depressive disorder // 0.844 Blood protein levels	CAPN11 | HSP90AB1 | MRPL14 | RSPH9 | SLC29A1 | SLC35B2		C6orf223 CAPN11 HSP90AB1 MRPL14 RSPH9 SLC29A1 SLC35B2 TMEM63B VEGFA	C6orf223, CAPN11, MRPL14, RP5-1120P11.1, RP5-1120P11.3, SLC35B2	100616124, 101929683, 101929705, 11131, 221416, 347734, 64928	Ribosome:MRPL14	Glycosaminoglycan metabolism:SLC35B2 | Mitochondrial translation initiation:MRPL14 | Mitochondrial translation elongation:MRPL14 | Mitochondrial translation termination:MRPL14 | Metabolism of carbohydrates:SLC35B2 | Mitochondrial translation:MRPL14 | Extracellular matrix organization:CAPN11		sulfur compound transport:SLC35B2 | positive regulation of I-kappaB kinase/NF-kappaB signaling:SLC35B2 | sulfur compound biosynthetic process:SLC35B2 | regulation of I-kappaB kinase/NF-kappaB signaling:SLC35B2 | I-kappaB kinase/NF-kappaB signaling:SLC35B2 | mitochondrial translational elongation:MRPL14 | mitochondrial translational termination:MRPL14 | protein-containing complex disassembly:MRPL14		VEGF	19.5984	19.5984	0.197744		A	G	0.446968	0.446968	388	0.985	0	FALSE	-0.0355504	-0.348639	-0.531841
rs4320361:43928511:G:T	FALSE		6	6p21.1	a224	43928511	rs7763440:43926708:G:A	0.997563	FALSE	C6orf223 (40 kb); MRPL14 (150 kb); TMEM63B (170 kb); VEGFA (170 kb)	C6orf223:protein_coding(KNOWN); MRPL14:protein_coding(KNOWN); TMEM63B:protein_coding(KNOWN); VEGFA:protein_coding(KNOWN)	C6orf223: chromosome 6 open reading frame 223 (40 kb)	-0.676896	-0.254433	0.969	0.332839	0.22	0.08	0.04	6	6	Motifs|PWM|Tcfap2e|	0.989 Vascular endothelial growth factor levels // 0.985 Vascular endothelial growth factor levels in major depressive disorder // 0.819 Blood protein levels	CAPN11 | HSP90AB1 | MRPL14 | RSPH9 | SLC29A1 | SLC35B2		C6orf223 CAPN11 HSP90AB1 MRPL14 RSPH9 SLC29A1 SLC35B2 TMEM63B VEGFA	C6orf223, CAPN11, MRPL14, RP5-1120P11.1, RP5-1120P11.3, SLC35B2	100616124, 101929683, 101929705, 11131, 221416, 347734, 64928	Ribosome:MRPL14	Glycosaminoglycan metabolism:SLC35B2 | Mitochondrial translation initiation:MRPL14 | Mitochondrial translation elongation:MRPL14 | Mitochondrial translation termination:MRPL14 | Metabolism of carbohydrates:SLC35B2 | Mitochondrial translation:MRPL14 | Extracellular matrix organization:CAPN11		sulfur compound transport:SLC35B2 | positive regulation of I-kappaB kinase/NF-kappaB signaling:SLC35B2 | sulfur compound biosynthetic process:SLC35B2 | regulation of I-kappaB kinase/NF-kappaB signaling:SLC35B2 | I-kappaB kinase/NF-kappaB signaling:SLC35B2 | mitochondrial translational elongation:MRPL14 | mitochondrial translational termination:MRPL14 | protein-containing complex disassembly:MRPL14		VEGF	19.5736	19.5736	0.197509		T	G	0.444813	0.444813	388	0.99	0	FALSE	-0.0339114	-0.352482	-0.535829
rs4513773:43925526:A:G	FALSE		6	6p21.1	a224	43925526	rs7763440:43926708:G:A	0.999421	FALSE	C6orf223 (43 kb); MRPL14 (160 kb); TMEM63B (170 kb); VEGFA (170 kb)	C6orf223:protein_coding(KNOWN); MRPL14:protein_coding(KNOWN); TMEM63B:protein_coding(KNOWN); VEGFA:protein_coding(KNOWN)	C6orf223: chromosome 6 open reading frame 223 (43 kb)	-0.12017	-0.165706	9.268	0.796335	0.19	0.15	0.01	6	6	Single_Nucleotides|eQTL|CUL9|Lymphoblastoid|cis, Chromatin_Structure|FAIRE|Mcf7|Hypoxlac	1 Vascular endothelial growth factor levels // 0.988 Vascular endothelial growth factor levels in major depressive disorder // 0.844 Blood protein levels	CAPN11 | HSP90AB1 | MRPL14 | RSPH9 | SLC29A1 | SLC35B2		C6orf223 CAPN11 HSP90AB1 MRPL14 RSPH9 SLC29A1 SLC35B2 TMEM63B VEGFA	C6orf223, CAPN11, MRPL14, RP5-1120P11.1, RP5-1120P11.3, SLC35B2	100616124, 101929683, 101929705, 11131, 221416, 347734, 64928	Ribosome:MRPL14	Glycosaminoglycan metabolism:SLC35B2 | Mitochondrial translation initiation:MRPL14 | Mitochondrial translation elongation:MRPL14 | Mitochondrial translation termination:MRPL14 | Metabolism of carbohydrates:SLC35B2 | Mitochondrial translation:MRPL14 | Extracellular matrix organization:CAPN11		sulfur compound transport:SLC35B2 | positive regulation of I-kappaB kinase/NF-kappaB signaling:SLC35B2 | sulfur compound biosynthetic process:SLC35B2 | regulation of I-kappaB kinase/NF-kappaB signaling:SLC35B2 | I-kappaB kinase/NF-kappaB signaling:SLC35B2 | mitochondrial translational elongation:MRPL14 | mitochondrial translational termination:MRPL14 | protein-containing complex disassembly:MRPL14		VEGF	19.5424	19.5424	0.197215		G	A	0.447256	0.447256	388	0.982	0	FALSE	-0.0354479	-0.349099	-0.531774
rs9472168:43928985:A:G	FALSE		6	6p21.1	a224	43928985	rs7763440:43926708:G:A	0.996196	FALSE	C6orf223 (39 kb); MRPL14 (150 kb); TMEM63B (170 kb); VEGFA (170 kb)	C6orf223:protein_coding(KNOWN); MRPL14:protein_coding(KNOWN); TMEM63B:protein_coding(KNOWN); VEGFA:protein_coding(KNOWN)	C6orf223: chromosome 6 open reading frame 223 (39 kb)	-0.110766	-0.167623	6.189	0.855183	0.29	0.13	0.03	6	6	Motifs|PWM|Nanog|, Motifs|PWM|Evi-1|, Motifs|PWM|Evi-1|, Motifs|PWM|Evi-1|, Motifs|PWM|Evi-1|, Chromatin_Structure|FAIRE|Panislets|	1 Vascular endothelial growth factor levels // 0.988 Vascular endothelial growth factor levels in major depressive disorder // 0.844 Blood protein levels	CAPN11 | HSP90AB1 | MRPL14 | RSPH9 | SLC29A1 | SLC35B2		C6orf223 CAPN11 HSP90AB1 MRPL14 RSPH9 SLC29A1 SLC35B2 TMEM63B VEGFA	C6orf223, CAPN11, MRPL14, RP5-1120P11.1, RP5-1120P11.3, SLC35B2	100616124, 101929683, 101929705, 11131, 221416, 347734, 64928	Ribosome:MRPL14	Glycosaminoglycan metabolism:SLC35B2 | Mitochondrial translation initiation:MRPL14 | Mitochondrial translation elongation:MRPL14 | Mitochondrial translation termination:MRPL14 | Metabolism of carbohydrates:SLC35B2 | Mitochondrial translation:MRPL14 | Extracellular matrix organization:CAPN11		sulfur compound transport:SLC35B2 | positive regulation of I-kappaB kinase/NF-kappaB signaling:SLC35B2 | sulfur compound biosynthetic process:SLC35B2 | regulation of I-kappaB kinase/NF-kappaB signaling:SLC35B2 | I-kappaB kinase/NF-kappaB signaling:SLC35B2 | mitochondrial translational elongation:MRPL14 | mitochondrial translational termination:MRPL14 | protein-containing complex disassembly:MRPL14		VEGF	19.5169	19.5169	0.196975		G	A	0.443728	0.443728	388	0.989	0	FALSE	-0.0331972	-0.353581	-0.53662
rs4637627:43925327:G:A	FALSE		6	6p21.1	a224	43925327	rs7763440:43926708:G:A	0.99921	FALSE	C6orf223 (43 kb); MRPL14 (160 kb); TMEM63B (170 kb); VEGFA (170 kb)	C6orf223:protein_coding(KNOWN); MRPL14:protein_coding(KNOWN); TMEM63B:protein_coding(KNOWN); VEGFA:protein_coding(KNOWN)	C6orf223: chromosome 6 open reading frame 223 (43 kb)	-0.347357	-0.204314	1.186	0.359753	0.2	0.07	0.02	7	7	Chromatin_Structure|FAIRE|Urotsa|	1 Vascular endothelial growth factor levels // 0.988 Vascular endothelial growth factor levels in major depressive disorder // 0.844 Blood protein levels	CAPN11 | HSP90AB1 | MRPL14 | RSPH9 | SLC29A1 | SLC35B2		C6orf223 CAPN11 HSP90AB1 MRPL14 RSPH9 SLC29A1 SLC35B2 TMEM63B VEGFA	C6orf223, CAPN11, MRPL14, RP5-1120P11.1, RP5-1120P11.3, SLC35B2	100616124, 101929683, 101929705, 11131, 221416, 347734, 64928	Ribosome:MRPL14	Glycosaminoglycan metabolism:SLC35B2 | Mitochondrial translation initiation:MRPL14 | Mitochondrial translation elongation:MRPL14 | Mitochondrial translation termination:MRPL14 | Metabolism of carbohydrates:SLC35B2 | Mitochondrial translation:MRPL14 | Extracellular matrix organization:CAPN11		sulfur compound transport:SLC35B2 | positive regulation of I-kappaB kinase/NF-kappaB signaling:SLC35B2 | sulfur compound biosynthetic process:SLC35B2 | regulation of I-kappaB kinase/NF-kappaB signaling:SLC35B2 | I-kappaB kinase/NF-kappaB signaling:SLC35B2 | mitochondrial translational elongation:MRPL14 | mitochondrial translational termination:MRPL14 | protein-containing complex disassembly:MRPL14		VEGF	19.4927	19.4927	0.196746		A	G	0.447388	0.447388	388	0.98	0	FALSE	-0.0353652	-0.349323	-0.531552
rs4349809:43924830:T:G	FALSE		6	6p21.1	a224	43924830	rs7763440:43926708:G:A	0.99853	FALSE	C6orf223 (43 kb); MRPL14 (160 kb); TMEM63B (170 kb); VEGFA (170 kb)	C6orf223:protein_coding(KNOWN); MRPL14:protein_coding(KNOWN); TMEM63B:protein_coding(KNOWN); VEGFA:protein_coding(KNOWN)	C6orf223: chromosome 6 open reading frame 223 (43 kb)	-0.24695	0.0712316	7.013	0.767382	0.22	0.17	0.04	5	5	Motifs|PWM|Evi-1|, Motifs|PWM|Evi-1|, Protein_Binding|ChIP-seq|TRIM28|K562|	0.996 Vascular endothelial growth factor levels in major depressive disorder // 0.992 Vascular endothelial growth factor levels // 0.829 Blood protein levels	CAPN11 | HSP90AB1 | MRPL14 | RSPH9 | SLC29A1 | SLC35B2		C6orf223 CAPN11 HSP90AB1 MRPL14 RSPH9 SLC29A1 SLC35B2 TMEM63B VEGFA	C6orf223, CAPN11, MRPL14, RP5-1120P11.1, RP5-1120P11.3, SLC35B2	100616124, 101929683, 101929705, 11131, 221416, 347734, 64928	Ribosome:MRPL14	Glycosaminoglycan metabolism:SLC35B2 | Mitochondrial translation initiation:MRPL14 | Mitochondrial translation elongation:MRPL14 | Mitochondrial translation termination:MRPL14 | Metabolism of carbohydrates:SLC35B2 | Mitochondrial translation:MRPL14 | Extracellular matrix organization:CAPN11		sulfur compound transport:SLC35B2 | positive regulation of I-kappaB kinase/NF-kappaB signaling:SLC35B2 | sulfur compound biosynthetic process:SLC35B2 | regulation of I-kappaB kinase/NF-kappaB signaling:SLC35B2 | I-kappaB kinase/NF-kappaB signaling:SLC35B2 | mitochondrial translational elongation:MRPL14 | mitochondrial translational termination:MRPL14 | protein-containing complex disassembly:MRPL14		VEGF	19.3751	19.3751	0.195634		G	T	0.447914	0.447914	388	0.976	0	FALSE	-0.0350059	-0.349999	-0.531223
rs4349808:43924774:T:C	FALSE		6	6p21.1	a224	43924774	rs7763440:43926708:G:A	0.998422	FALSE	C6orf223 (44 kb); MRPL14 (160 kb); TMEM63B (170 kb); VEGFA (170 kb)	C6orf223:protein_coding(KNOWN); MRPL14:protein_coding(KNOWN); TMEM63B:protein_coding(KNOWN); VEGFA:protein_coding(KNOWN)	C6orf223: chromosome 6 open reading frame 223 (44 kb)	0.0748426	0.158649	9.994	0.889985	0.29	0.27	0.07	5	5	Motifs|PWM|Hoxa6|, Motifs|PWM|Hoxb6|, Motifs|PWM|Hoxc6|, Motifs|Footprinting|HOXC-8|Huvec, Motifs|PWM|HOXC-8|, Motifs|PWM|Dlx2|, Motifs|PWM|Hoxa2|, Motifs|PWM|Hoxa5|, Motifs|PWM|Hoxa6|, Motifs|PWM|Hoxb6|, Motifs|PWM|Hoxc8|, Motifs|PWM|Meox1|, Motifs|PWM|IPF1|, Motifs|PWM|MEOX2|, Motifs|PWM|MEOX2|, Protein_Binding|ChIP-seq|SETDB1|U2OS|, Protein_Binding|ChIP-seq|TRIM28|K562|	1 Vascular endothelial growth factor levels // 0.988 Vascular endothelial growth factor levels in major depressive disorder // 0.844 Blood protein levels	CAPN11 | HSP90AB1 | MRPL14 | RSPH9 | SLC29A1 | SLC35B2		C6orf223 CAPN11 HSP90AB1 MRPL14 RSPH9 SLC29A1 SLC35B2 TMEM63B VEGFA	C6orf223, CAPN11, MRPL14, RP5-1120P11.1, RP5-1120P11.3, SLC35B2	100616124, 101929683, 101929705, 11131, 221416, 347734, 64928	Ribosome:MRPL14	Glycosaminoglycan metabolism:SLC35B2 | Mitochondrial translation initiation:MRPL14 | Mitochondrial translation elongation:MRPL14 | Mitochondrial translation termination:MRPL14 | Metabolism of carbohydrates:SLC35B2 | Mitochondrial translation:MRPL14 | Extracellular matrix organization:CAPN11		sulfur compound transport:SLC35B2 | positive regulation of I-kappaB kinase/NF-kappaB signaling:SLC35B2 | sulfur compound biosynthetic process:SLC35B2 | regulation of I-kappaB kinase/NF-kappaB signaling:SLC35B2 | I-kappaB kinase/NF-kappaB signaling:SLC35B2 | mitochondrial translational elongation:MRPL14 | mitochondrial translational termination:MRPL14 | protein-containing complex disassembly:MRPL14		VEGF	19.3232	19.3232	0.195144		C	T	0.448119	0.448119	388	0.973	0	FALSE	-0.0349451	-0.349073	-0.530144
rs78355601:43924763:G:A	FALSE		6	6p21.1	a224	43924763	rs7763440:43926708:G:A	0.995853	FALSE	C6orf223 (44 kb); MRPL14 (160 kb); TMEM63B (170 kb); VEGFA (170 kb)	C6orf223:protein_coding(KNOWN); MRPL14:protein_coding(KNOWN); TMEM63B:protein_coding(KNOWN); VEGFA:protein_coding(KNOWN)	C6orf223: chromosome 6 open reading frame 223 (44 kb)	-0.516648	0.073	7.432	0.873241	0.28	0.15	0.07	4	4	4:Chromatin_Structure|DNase-seq|Saec|, Chromatin_Structure|DNase-seq|Nhek|, Protein_Binding|ChIP-seq|SETDB1|U2OS|, Protein_Binding|ChIP-seq|TRIM28|K562|;4:NA	1 Vascular endothelial growth factor levels in major depressive disorder // 0.988 Vascular endothelial growth factor levels // 0.834 Blood protein levels	CAPN11 | HSP90AB1 | MRPL14 | RSPH9 | SLC29A1 | SLC35B2		C6orf223 CAPN11 HSP90AB1 MRPL14 RSPH9 SLC29A1 SLC35B2 TMEM63B VEGFA	C6orf223, CAPN11, MRPL14, RP5-1120P11.1, RP5-1120P11.3, SLC35B2	100616124, 101929683, 101929705, 11131, 221416, 347734, 64928	Ribosome:MRPL14	Glycosaminoglycan metabolism:SLC35B2 | Mitochondrial translation initiation:MRPL14 | Mitochondrial translation elongation:MRPL14 | Mitochondrial translation termination:MRPL14 | Metabolism of carbohydrates:SLC35B2 | Mitochondrial translation:MRPL14 | Extracellular matrix organization:CAPN11		sulfur compound transport:SLC35B2 | positive regulation of I-kappaB kinase/NF-kappaB signaling:SLC35B2 | sulfur compound biosynthetic process:SLC35B2 | regulation of I-kappaB kinase/NF-kappaB signaling:SLC35B2 | I-kappaB kinase/NF-kappaB signaling:SLC35B2 | mitochondrial translational elongation:MRPL14 | mitochondrial translational termination:MRPL14 | protein-containing complex disassembly:MRPL14		VEGF	19.1247	19.1247	0.193262		A	G	0.447108	0.447108	388	0.975	0	FALSE	-0.0352063	-0.349409	-0.52721
rs6921438:43925607:G:A	FALSE		6	6p21.1	a224	43925607	rs7763440:43926708:G:A	0.966362	FALSE	C6orf223 (43 kb); MRPL14 (160 kb); TMEM63B (170 kb); VEGFA (170 kb)	C6orf223:protein_coding(KNOWN); MRPL14:protein_coding(KNOWN); TMEM63B:protein_coding(KNOWN); VEGFA:protein_coding(KNOWN)	C6orf223: chromosome 6 open reading frame 223 (43 kb)	-0.230543	-0.186624	2.278	0.761722	0.15	0.08	0.01	6	6	Single_Nucleotides|eQTL|CUL9|Lymphoblastoid|cis	0.934 Vascular endothelial growth factor levels // 0.915 Vascular endothelial growth factor levels in major depressive disorder // 0.782 Blood protein levels	CAPN11 | HSP90AB1 | MRPL14 | RSPH9 | SLC29A1 | SLC35B2 | SPATS1 | SUPT3H		C6orf223 CAPN11 HSP90AB1 MRPL14 RSPH9 SLC29A1 SLC35B2 SPATS1 SUPT3H TMEM63B VEGFA	C6orf223, CAPN11, MRPL14, RP5-1120P11.1, RP5-1120P11.3, SLC35B2	100616124, 101929683, 101929705, 11131, 221416, 347734, 64928	Ribosome:MRPL14	Glycosaminoglycan metabolism:SLC35B2 | Mitochondrial translation initiation:MRPL14 | Mitochondrial translation elongation:MRPL14 | Mitochondrial translation termination:MRPL14 | Metabolism of carbohydrates:SLC35B2 | Mitochondrial translation:MRPL14 | Extracellular matrix organization:CAPN11		sulfur compound transport:SLC35B2 | positive regulation of I-kappaB kinase/NF-kappaB signaling:SLC35B2 | sulfur compound biosynthetic process:SLC35B2 | regulation of I-kappaB kinase/NF-kappaB signaling:SLC35B2 | I-kappaB kinase/NF-kappaB signaling:SLC35B2 | mitochondrial translational elongation:MRPL14 | mitochondrial translational termination:MRPL14 | protein-containing complex disassembly:MRPL14		VEGF	18.7824	18.7824	0.190009		A	G	0.461129	0.461129	388	0.96	0	FALSE	-0.0265687	-0.355946	-0.529872
rs9472172:43930985:C:T	FALSE		6	6p21.1	a224	43930985	rs7763440:43926708:G:A	0.979311	FALSE	C6orf223 (37 kb); MRPL14 (150 kb); TMEM63B (160 kb); VEGFA (180 kb)	C6orf223:protein_coding(KNOWN); MRPL14:protein_coding(KNOWN); TMEM63B:protein_coding(KNOWN); VEGFA:protein_coding(KNOWN)	C6orf223: chromosome 6 open reading frame 223 (37 kb)	-0.236665	-0.0364434	4.862	0.3773	0.27	0.22	0.05	5	5	Motifs|PWM|MEF-2|, Motifs|PWM|MEF2A|, Protein_Binding|ChIP-seq|CEBPB|K562|	0.992 Vascular endothelial growth factor levels // 0.981 Vascular endothelial growth factor levels in major depressive disorder // 0.837 Blood protein levels	CAPN11 | HSP90AB1 | MRPL14 | RSPH9 | SLC29A1 | SLC35B2		C6orf223 CAPN11 HSP90AB1 MRPL14 RSPH9 SLC29A1 SLC35B2 TMEM63B VEGFA	C6orf223, CAPN11, MRPL14, RP5-1120P11.1, RP5-1120P11.3, SLC35B2	100616124, 101929683, 101929705, 11131, 221416, 347734, 64928	Ribosome:MRPL14	Glycosaminoglycan metabolism:SLC35B2 | Mitochondrial translation initiation:MRPL14 | Mitochondrial translation elongation:MRPL14 | Mitochondrial translation termination:MRPL14 | Metabolism of carbohydrates:SLC35B2 | Mitochondrial translation:MRPL14 | Extracellular matrix organization:CAPN11		sulfur compound transport:SLC35B2 | positive regulation of I-kappaB kinase/NF-kappaB signaling:SLC35B2 | sulfur compound biosynthetic process:SLC35B2 | regulation of I-kappaB kinase/NF-kappaB signaling:SLC35B2 | I-kappaB kinase/NF-kappaB signaling:SLC35B2 | mitochondrial translational elongation:MRPL14 | mitochondrial translational termination:MRPL14 | protein-containing complex disassembly:MRPL14		VEGF	18.4532	18.4532	0.18687		T	C	0.441206	0.441206	388	0.989	0	FALSE	-0.0286168	-0.35037	-0.527081
rs35708074:43925006:CA:C	TRUE		6	6p21.1	a224	43925006	rs7763440:43926708:G:A	0.975079	FALSE	C6orf223 (43 kb); MRPL14 (160 kb); TMEM63B (170 kb); VEGFA (170 kb)	C6orf223:protein_coding(KNOWN); MRPL14:protein_coding(KNOWN); TMEM63B:protein_coding(KNOWN); VEGFA:protein_coding(KNOWN)	C6orf223: chromosome 6 open reading frame 223 (43 kb)											0.965 Vascular endothelial growth factor levels // 0.962 Vascular endothelial growth factor levels in major depressive disorder // 0.819 Blood protein levels	CAPN11 | HSP90AB1 | MRPL14 | SLC29A1 | SLC35B2		C6orf223 CAPN11 HSP90AB1 MRPL14 SLC29A1 SLC35B2 TMEM63B VEGFA	C6orf223, CAPN11, MRPL14, RP5-1120P11.1, RP5-1120P11.3, SLC35B2	100616124, 101929683, 101929705, 11131, 221416, 347734, 64928	Ribosome:MRPL14	Glycosaminoglycan metabolism:SLC35B2 | Mitochondrial translation initiation:MRPL14 | Mitochondrial translation elongation:MRPL14 | Mitochondrial translation termination:MRPL14 | Metabolism of carbohydrates:SLC35B2 | Mitochondrial translation:MRPL14 | Extracellular matrix organization:CAPN11		sulfur compound transport:SLC35B2 | positive regulation of I-kappaB kinase/NF-kappaB signaling:SLC35B2 | sulfur compound biosynthetic process:SLC35B2 | regulation of I-kappaB kinase/NF-kappaB signaling:SLC35B2 | I-kappaB kinase/NF-kappaB signaling:SLC35B2 | mitochondrial translational elongation:MRPL14 | mitochondrial translational termination:MRPL14 | protein-containing complex disassembly:MRPL14		VEGF	18.3037	18.3037	0.185439		C	CA	0.444597	0.444597	388	0.956	0	FALSE	-0.0311492	-0.342723	-0.512294
rs11757868:43932233:C:T	FALSE		6	6p21.1	a224	43932233	rs7763440:43926708:G:A	0.961181	FALSE	C6orf223 (36 kb); MRPL14 (150 kb); TMEM63B (160 kb); VEGFA (180 kb)	C6orf223:protein_coding(KNOWN); MRPL14:protein_coding(KNOWN); TMEM63B:protein_coding(KNOWN); VEGFA:protein_coding(KNOWN)	C6orf223: chromosome 6 open reading frame 223 (36 kb)	-0.429006	-0.0373542	0.807	0.479635	0.26	0.45	0.26	3a	3	Motifs|PWM|REST|, Motifs|PWM|NRSF|, Motifs|PWM|NRSF|, Motifs|PWM|Hbp1|, Chromatin_Structure|DNase-seq|Fibrobl|, Protein_Binding|ChIP-seq|CHD1|K562|, Protein_Binding|ChIP-seq|ZKSCAN1|HeLa-S3|, Protein_Binding|ChIP-seq|EP300|K562|	0.981 Vascular endothelial growth factor levels // 0.97 Vascular endothelial growth factor levels in major depressive disorder // 0.83 Blood protein levels	CAPN11 | HSP90AB1 | MRPL14 | SLC29A1 | SLC35B2		C6orf223 CAPN11 HSP90AB1 MRPL14 SLC29A1 SLC35B2 TMEM63B VEGFA	C6orf223, CAPN11, MRPL14, RP5-1120P11.1, RP5-1120P11.3, SLC35B2	100616124, 101929683, 101929705, 11131, 221416, 347734, 64928	Ribosome:MRPL14	Glycosaminoglycan metabolism:SLC35B2 | Mitochondrial translation initiation:MRPL14 | Mitochondrial translation elongation:MRPL14 | Mitochondrial translation termination:MRPL14 | Metabolism of carbohydrates:SLC35B2 | Mitochondrial translation:MRPL14 | Extracellular matrix organization:CAPN11		sulfur compound transport:SLC35B2 | positive regulation of I-kappaB kinase/NF-kappaB signaling:SLC35B2 | sulfur compound biosynthetic process:SLC35B2 | regulation of I-kappaB kinase/NF-kappaB signaling:SLC35B2 | I-kappaB kinase/NF-kappaB signaling:SLC35B2 | mitochondrial translational elongation:MRPL14 | mitochondrial translational termination:MRPL14 | protein-containing complex disassembly:MRPL14		VEGF	17.8429	17.8429	0.181018		T	C	0.43715	0.43715	388	0.997	0	FALSE	-0.0280539	-0.36008	-0.5282
rs11757903:43932223:G:A	FALSE		6	6p21.1	a224	43932223	rs7763440:43926708:G:A	0.963712	FALSE	C6orf223 (36 kb); MRPL14 (150 kb); TMEM63B (160 kb); VEGFA (180 kb)	C6orf223:protein_coding(KNOWN); MRPL14:protein_coding(KNOWN); TMEM63B:protein_coding(KNOWN); VEGFA:protein_coding(KNOWN)	C6orf223: chromosome 6 open reading frame 223 (36 kb)	-0.362089	-0.0189976	0.47	0.495496	0.28	0.37	0.3	4	4	Chromatin_Structure|DNase-seq|Fibrobl|, Chromatin_Structure|DNase-seq|Tregwb83319432|, Protein_Binding|ChIP-seq|CHD1|K562|, Protein_Binding|ChIP-seq|ZKSCAN1|HeLa-S3|, Protein_Binding|ChIP-seq|EP300|K562|	0.989 Vascular endothelial growth factor levels // 0.977 Vascular endothelial growth factor levels in major depressive disorder // 0.836 Blood protein levels	CAPN11 | HSP90AB1 | MRPL14 | RSPH9 | SLC29A1 | SLC35B2		C6orf223 CAPN11 HSP90AB1 MRPL14 RSPH9 SLC29A1 SLC35B2 TMEM63B VEGFA	C6orf223, CAPN11, MRPL14, RP5-1120P11.1, RP5-1120P11.3, SLC35B2	100616124, 101929683, 101929705, 11131, 221416, 347734, 64928	Ribosome:MRPL14	Glycosaminoglycan metabolism:SLC35B2 | Mitochondrial translation initiation:MRPL14 | Mitochondrial translation elongation:MRPL14 | Mitochondrial translation termination:MRPL14 | Metabolism of carbohydrates:SLC35B2 | Mitochondrial translation:MRPL14 | Extracellular matrix organization:CAPN11		sulfur compound transport:SLC35B2 | positive regulation of I-kappaB kinase/NF-kappaB signaling:SLC35B2 | sulfur compound biosynthetic process:SLC35B2 | regulation of I-kappaB kinase/NF-kappaB signaling:SLC35B2 | I-kappaB kinase/NF-kappaB signaling:SLC35B2 | mitochondrial translational elongation:MRPL14 | mitochondrial translational termination:MRPL14 | protein-containing complex disassembly:MRPL14		VEGF	17.6942	17.6942	0.179586		A	G	0.4384	0.4384	388	0.998	0	FALSE	-0.0253077	-0.344612	-0.516468
rs11757888:43932319:C:T	FALSE		6	6p21.1	a224	43932319	rs7763440:43926708:G:A	0.961945	FALSE	C6orf223 (36 kb); MRPL14 (150 kb); TMEM63B (160 kb); VEGFA (180 kb)	C6orf223:protein_coding(KNOWN); MRPL14:protein_coding(KNOWN); TMEM63B:protein_coding(KNOWN); VEGFA:protein_coding(KNOWN)	C6orf223: chromosome 6 open reading frame 223 (36 kb)	-0.507387	-0.0719471	3.088	0.375707	0.33	0.36	0.28	4	4	Chromatin_Structure|DNase-seq|K562|, Chromatin_Structure|DNase-seq|K562|Znff41b2, Chromatin_Structure|DNase-seq|Cmk|, Chromatin_Structure|DNase-seq|Fibrobl|, Protein_Binding|ChIP-seq|CHD1|K562|, Protein_Binding|ChIP-seq|EP300|K562|	0.992 Vascular endothelial growth factor levels // 0.981 Vascular endothelial growth factor levels in major depressive disorder // 0.839 Blood protein levels	CAPN11 | HSP90AB1 | MRPL14 | RSPH9 | SLC29A1 | SLC35B2		C6orf223 CAPN11 HSP90AB1 MRPL14 RSPH9 SLC29A1 SLC35B2 TMEM63B VEGFA	C6orf223, CAPN11, MRPL14, RP5-1120P11.1, RP5-1120P11.3, SLC35B2	100616124, 101929683, 101929705, 11131, 221416, 347734, 64928	Ribosome:MRPL14	Glycosaminoglycan metabolism:SLC35B2 | Mitochondrial translation initiation:MRPL14 | Mitochondrial translation elongation:MRPL14 | Mitochondrial translation termination:MRPL14 | Metabolism of carbohydrates:SLC35B2 | Mitochondrial translation:MRPL14 | Extracellular matrix organization:CAPN11		sulfur compound transport:SLC35B2 | positive regulation of I-kappaB kinase/NF-kappaB signaling:SLC35B2 | sulfur compound biosynthetic process:SLC35B2 | regulation of I-kappaB kinase/NF-kappaB signaling:SLC35B2 | I-kappaB kinase/NF-kappaB signaling:SLC35B2 | mitochondrial translational elongation:MRPL14 | mitochondrial translational termination:MRPL14 | protein-containing complex disassembly:MRPL14		VEGF	17.633	17.633	0.178996		T	C	0.438144	0.438144	388	1	2	FALSE	-0.0248879	-0.34389	-0.515715
rs9472159:43919695:C:A	FALSE		6	6p21.1	a224	43919695	rs7763440:43926708:G:A	0.875207	FALSE	C6orf223 (49 kb); MRPL14 (160 kb); VEGFA (170 kb); TMEM63B (170 kb)	C6orf223:protein_coding(KNOWN); MRPL14:protein_coding(KNOWN); VEGFA:protein_coding(KNOWN); TMEM63B:protein_coding(KNOWN)	C6orf223: chromosome 6 open reading frame 223 (49 kb)	0.506272	1.27271	7.378	0.400089	0.32	0.5	0.34	2b	2	Motifs|Footprinting|PPARalpha:RXRalpha|Gm12892, Motifs|Footprinting|PPARalpha:RXRalpha|Chorion, Motifs|PWM|PPARalpha:RXRalpha|, Chromatin_Structure|DNase-seq|Mcf7|, Chromatin_Structure|DNase-seq|Mcf7|Hypoxlac, Chromatin_Structure|DNase-seq|Mcf7|Hypoxlaccon, Chromatin_Structure|DNase-seq|Helas3|, Chromatin_Structure|DNase-seq|Mcf7|Randshrna, Chromatin_Structure|DNase-seq|Mcf7|Ctcfshrna, Chromatin_…	1 Blood protein levels // 0.844 Vascular endothelial growth factor levels // 0.834 Vascular endothelial growth factor levels in major depressive disorder	CAPN11 | HSP90AB1 | MRPL14 | SLC29A1 | SLC35B2 | SPATS1 | SUPT3H		C6orf223 CAPN11 HSP90AB1 MRPL14 SLC29A1 SLC35B2 SPATS1 SUPT3H TMEM63B VEGFA	C6orf223, CAPN11, MRPL14, RP5-1120P11.1, RP5-1120P11.3, SLC35B2	100616124, 101929683, 101929705, 11131, 221416, 347734, 64928	Ribosome:MRPL14	Glycosaminoglycan metabolism:SLC35B2 | Mitochondrial translation initiation:MRPL14 | Mitochondrial translation elongation:MRPL14 | Mitochondrial translation termination:MRPL14 | Metabolism of carbohydrates:SLC35B2 | Mitochondrial translation:MRPL14 | Extracellular matrix organization:CAPN11		sulfur compound transport:SLC35B2 | positive regulation of I-kappaB kinase/NF-kappaB signaling:SLC35B2 | sulfur compound biosynthetic process:SLC35B2 | regulation of I-kappaB kinase/NF-kappaB signaling:SLC35B2 | I-kappaB kinase/NF-kappaB signaling:SLC35B2 | mitochondrial translational elongation:MRPL14 | mitochondrial translational termination:MRPL14 | protein-containing complex disassembly:MRPL14		VEGF	15.5858	15.5858	0.159034		A	C	0.474669	0.474669	388	0.916	0	FALSE	-0.0323805	-0.36011	-0.484408
rs7745184:43926638:T:G	FALSE		6	6p21.1	a224	43926638	rs7745184:43926638:T:G	1	TRUE	C6orf223 (42 kb); MRPL14 (150 kb); TMEM63B (170 kb); VEGFA (170 kb)	C6orf223:protein_coding(KNOWN); MRPL14:protein_coding(KNOWN); TMEM63B:protein_coding(KNOWN); VEGFA:protein_coding(KNOWN)	C6orf223: chromosome 6 open reading frame 223 (42 kb)	-0.25344	-0.196787	1.464	0.508106	0.23	0.15	0.05	6	6	Motifs|PWM|Dbx1|, Motifs|PWM|Sox14|, Motifs|PWM|Sox14|, Motifs|PWM|Sox21|, Motifs|PWM|Sox21|, Motifs|PWM|Zfp105|	0.644 Vascular endothelial growth factor levels // 0.628 Vascular endothelial growth factor levels in major depressive disorder // 0.497 Blood protein levels	CAPN11 | HSP90AB1 | MRPL14 | RSPH9 | SLC29A1 | SLC35B2 | SPATS1 | SUPT3H		C6orf223 CAPN11 HSP90AB1 MRPL14 RSPH9 SLC29A1 SLC35B2 SPATS1 SUPT3H TMEM63B VEGFA	C6orf223, MRPL14, RP5-1120P11.1, RP5-1120P11.3, SLC35B2	100616124, 101929683, 101929705, 221416, 347734, 64928	Ribosome:MRPL14	Glycosaminoglycan metabolism:SLC35B2 | Mitochondrial translation initiation:MRPL14 | Mitochondrial translation elongation:MRPL14 | Mitochondrial translation termination:MRPL14 | Metabolism of carbohydrates:SLC35B2 | Mitochondrial translation:MRPL14		sulfur compound transport:SLC35B2 | positive regulation of I-kappaB kinase/NF-kappaB signaling:SLC35B2 | sulfur compound biosynthetic process:SLC35B2 | regulation of I-kappaB kinase/NF-kappaB signaling:SLC35B2 | I-kappaB kinase/NF-kappaB signaling:SLC35B2 | mitochondrial translational elongation:MRPL14 | mitochondrial translational termination:MRPL14 | protein-containing complex disassembly:MRPL14		VEGF	15.2177	15.2177	0.155397		T	G	0.424414	0.424414	388	0.895	0	FALSE	0.0266898	0.310143	0.535714
rs7745183:43926635:T:G	FALSE		6	6p21.1	a224	43926635	rs7745184:43926638:T:G	0.998219	FALSE	C6orf223 (42 kb); MRPL14 (150 kb); TMEM63B (170 kb); VEGFA (170 kb)	C6orf223:protein_coding(KNOWN); MRPL14:protein_coding(KNOWN); TMEM63B:protein_coding(KNOWN); VEGFA:protein_coding(KNOWN)	C6orf223: chromosome 6 open reading frame 223 (42 kb)	-0.237342	-0.193691	1.425	0.502805	0.23	0.15	0.05	6	6	Motifs|PWM|Elf3|, Motifs|PWM|Dbx1|, Motifs|PWM|Sox14|, Motifs|PWM|Sox14|, Motifs|PWM|Sox21|, Motifs|PWM|Sox21|, Motifs|PWM|Zfp105|, Motifs|PWM|Zfp105|	0.653 Vascular endothelial growth factor levels // 0.636 Vascular endothelial growth factor levels in major depressive disorder // 0.505 Blood protein levels	CAPN11 | HSP90AB1 | MRPL14 | RSPH9 | SLC29A1 | SLC35B2 | SPATS1 | SUPT3H		C6orf223 CAPN11 HSP90AB1 MRPL14 RSPH9 SLC29A1 SLC35B2 SPATS1 SUPT3H TMEM63B VEGFA	C6orf223, MRPL14, RP5-1120P11.1, RP5-1120P11.3, SLC35B2	100616124, 101929683, 101929705, 221416, 347734, 64928	Ribosome:MRPL14	Glycosaminoglycan metabolism:SLC35B2 | Mitochondrial translation initiation:MRPL14 | Mitochondrial translation elongation:MRPL14 | Mitochondrial translation termination:MRPL14 | Metabolism of carbohydrates:SLC35B2 | Mitochondrial translation:MRPL14		sulfur compound transport:SLC35B2 | positive regulation of I-kappaB kinase/NF-kappaB signaling:SLC35B2 | sulfur compound biosynthetic process:SLC35B2 | regulation of I-kappaB kinase/NF-kappaB signaling:SLC35B2 | I-kappaB kinase/NF-kappaB signaling:SLC35B2 | mitochondrial translational elongation:MRPL14 | mitochondrial translational termination:MRPL14 | protein-containing complex disassembly:MRPL14		VEGF	15.1222	15.1222	0.154452		T	G	0.427306	0.427306	388	0.895	0	FALSE	0.0257264	0.304668	0.529451
rs4481426:43928108:C:T	FALSE		6	6p21.1	a224	43928108	rs7745184:43926638:T:G	0.995379	FALSE	C6orf223 (40 kb); MRPL14 (150 kb); TMEM63B (170 kb); VEGFA (170 kb)	C6orf223:protein_coding(KNOWN); MRPL14:protein_coding(KNOWN); TMEM63B:protein_coding(KNOWN); VEGFA:protein_coding(KNOWN)	C6orf223: chromosome 6 open reading frame 223 (40 kb)	-0.712072	-0.259313	1.874	0.211225	0.26	0.12	0.01	6	6	Motifs|PWM|Bbx|, Motifs|PWM|Cdc5|	0.644 Vascular endothelial growth factor levels // 0.64 Vascular endothelial growth factor levels in major depressive disorder // 0.491 Blood protein levels	CAPN11 | HSP90AB1 | MRPL14 | RSPH9 | SLC29A1 | SLC35B2 | SPATS1 | SUPT3H		C6orf223 CAPN11 HSP90AB1 MRPL14 RSPH9 SLC29A1 SLC35B2 SPATS1 SUPT3H TMEM63B VEGFA	C6orf223, MRPL14, RP5-1120P11.1, RP5-1120P11.3, SLC35B2	100616124, 101929683, 101929705, 221416, 347734, 64928	Ribosome:MRPL14	Glycosaminoglycan metabolism:SLC35B2 | Mitochondrial translation initiation:MRPL14 | Mitochondrial translation elongation:MRPL14 | Mitochondrial translation termination:MRPL14 | Metabolism of carbohydrates:SLC35B2 | Mitochondrial translation:MRPL14		sulfur compound transport:SLC35B2 | positive regulation of I-kappaB kinase/NF-kappaB signaling:SLC35B2 | sulfur compound biosynthetic process:SLC35B2 | regulation of I-kappaB kinase/NF-kappaB signaling:SLC35B2 | I-kappaB kinase/NF-kappaB signaling:SLC35B2 | mitochondrial translational elongation:MRPL14 | mitochondrial translational termination:MRPL14 | protein-containing complex disassembly:MRPL14		VEGF	14.9382	14.9382	0.152627		C	T	0.427495	0.427495	388	0.896	0	FALSE	0.0251079	0.305116	0.531287
rs4382251:43925373:T:C	FALSE		6	6p21.1	a224	43925373	rs7745184:43926638:T:G	0.996329	FALSE	C6orf223 (43 kb); MRPL14 (160 kb); TMEM63B (170 kb); VEGFA (170 kb)	C6orf223:protein_coding(KNOWN); MRPL14:protein_coding(KNOWN); TMEM63B:protein_coding(KNOWN); VEGFA:protein_coding(KNOWN)	C6orf223: chromosome 6 open reading frame 223 (43 kb)	-0.675586	-0.253092	0.592	0.621425	0.19	0.16	0.03	7	7	Chromatin_Structure|FAIRE|Urotsa|, Chromatin_Structure|FAIRE|Mcf7|Hypoxlac	0.648 Vascular endothelial growth factor levels // 0.644 Vascular endothelial growth factor levels in major depressive disorder // 0.494 Blood protein levels	CAPN11 | HSP90AB1 | MRPL14 | RSPH9 | SLC29A1 | SLC35B2 | SPATS1 | SUPT3H		C6orf223 CAPN11 HSP90AB1 MRPL14 RSPH9 SLC29A1 SLC35B2 SPATS1 SUPT3H TMEM63B VEGFA	C6orf223, MRPL14, RP5-1120P11.1, RP5-1120P11.3, SLC35B2	100616124, 101929683, 101929705, 221416, 347734, 64928	Ribosome:MRPL14	Glycosaminoglycan metabolism:SLC35B2 | Mitochondrial translation initiation:MRPL14 | Mitochondrial translation elongation:MRPL14 | Mitochondrial translation termination:MRPL14 | Metabolism of carbohydrates:SLC35B2 | Mitochondrial translation:MRPL14		sulfur compound transport:SLC35B2 | positive regulation of I-kappaB kinase/NF-kappaB signaling:SLC35B2 | sulfur compound biosynthetic process:SLC35B2 | regulation of I-kappaB kinase/NF-kappaB signaling:SLC35B2 | I-kappaB kinase/NF-kappaB signaling:SLC35B2 | mitochondrial translational elongation:MRPL14 | mitochondrial translational termination:MRPL14 | protein-containing complex disassembly:MRPL14		VEGF	14.936	14.936	0.152604		T	C	0.426023	0.426023	388	0.896	0	FALSE	0.0267866	0.304269	0.529856
rs9472171:43930962:A:G	FALSE		6	6p21.1	a224	43930962	rs7745184:43926638:T:G	0.943402	FALSE	C6orf223 (37 kb); MRPL14 (150 kb); TMEM63B (160 kb); VEGFA (180 kb)	C6orf223:protein_coding(KNOWN); MRPL14:protein_coding(KNOWN); TMEM63B:protein_coding(KNOWN); VEGFA:protein_coding(KNOWN)	C6orf223: chromosome 6 open reading frame 223 (37 kb)	-0.647261	-0.208013	1.54	0.729255	0.33	0.25	0.09	6	6	Motifs|PWM|SPDEF|	0.698 Vascular endothelial growth factor levels in major depressive disorder // 0.696 Vascular endothelial growth factor levels // 0.538 Blood protein levels	CAPN11 | HSP90AB1 | MRPL14 | RSPH9 | SLC29A1 | SLC35B2 | SPATS1 | SUPT3H		C6orf223 CAPN11 HSP90AB1 MRPL14 RSPH9 SLC29A1 SLC35B2 SPATS1 SUPT3H TMEM63B VEGFA	C6orf223, MRPL14, RP5-1120P11.1, RP5-1120P11.3, SLC35B2	100616124, 101929683, 101929705, 221416, 347734, 64928	Ribosome:MRPL14	Glycosaminoglycan metabolism:SLC35B2 | Mitochondrial translation initiation:MRPL14 | Mitochondrial translation elongation:MRPL14 | Mitochondrial translation termination:MRPL14 | Metabolism of carbohydrates:SLC35B2 | Mitochondrial translation:MRPL14		sulfur compound transport:SLC35B2 | positive regulation of I-kappaB kinase/NF-kappaB signaling:SLC35B2 | sulfur compound biosynthetic process:SLC35B2 | regulation of I-kappaB kinase/NF-kappaB signaling:SLC35B2 | I-kappaB kinase/NF-kappaB signaling:SLC35B2 | mitochondrial translational elongation:MRPL14 | mitochondrial translational termination:MRPL14 | protein-containing complex disassembly:MRPL14		VEGF	14.8688	14.8688	0.151937		A	G	0.441824	0.441824	388	0.901	0	FALSE	0.0298877	0.30246	0.531273
rs9472170:43929421:G:C	FALSE		6	6p21.1	a224	43929421	rs7745184:43926638:T:G	0.990634	FALSE	C6orf223 (39 kb); MRPL14 (150 kb); TMEM63B (170 kb); VEGFA (180 kb)	C6orf223:protein_coding(KNOWN); MRPL14:protein_coding(KNOWN); TMEM63B:protein_coding(KNOWN); VEGFA:protein_coding(KNOWN)	C6orf223: chromosome 6 open reading frame 223 (39 kb)	-0.609299	-0.234839	0.31	0.539459	0.29	0.27	0.07	7	7		0.644 Vascular endothelial growth factor levels // 0.64 Vascular endothelial growth factor levels in major depressive disorder // 0.491 Blood protein levels	CAPN11 | HSP90AB1 | MRPL14 | RSPH9 | SLC29A1 | SLC35B2 | SPATS1 | SUPT3H		C6orf223 CAPN11 HSP90AB1 MRPL14 RSPH9 SLC29A1 SLC35B2 SPATS1 SUPT3H TMEM63B VEGFA	C6orf223, MRPL14, RP5-1120P11.1, RP5-1120P11.3, SLC35B2	100616124, 101929683, 101929705, 221416, 347734, 64928	Ribosome:MRPL14	Glycosaminoglycan metabolism:SLC35B2 | Mitochondrial translation initiation:MRPL14 | Mitochondrial translation elongation:MRPL14 | Mitochondrial translation termination:MRPL14 | Metabolism of carbohydrates:SLC35B2 | Mitochondrial translation:MRPL14		sulfur compound transport:SLC35B2 | positive regulation of I-kappaB kinase/NF-kappaB signaling:SLC35B2 | sulfur compound biosynthetic process:SLC35B2 | regulation of I-kappaB kinase/NF-kappaB signaling:SLC35B2 | I-kappaB kinase/NF-kappaB signaling:SLC35B2 | mitochondrial translational elongation:MRPL14 | mitochondrial translational termination:MRPL14 | protein-containing complex disassembly:MRPL14		VEGF	14.6856	14.6856	0.150116		G	C	0.427548	0.427548	388	0.888	0	FALSE	0.0236079	0.308191	0.532913
rs943075:43922205:A:G	FALSE		6	6p21.1	a224	43922205	rs7745184:43926638:T:G	0.986228	FALSE	C6orf223 (46 kb); MRPL14 (160 kb); VEGFA (170 kb); TMEM63B (170 kb)	C6orf223:protein_coding(KNOWN); MRPL14:protein_coding(KNOWN); VEGFA:protein_coding(KNOWN); TMEM63B:protein_coding(KNOWN)	C6orf223: chromosome 6 open reading frame 223 (46 kb)	-0.262244	0.193938	4.86	0.366058	0.42	0.47	0.3	4	4	Chromatin_Structure|DNase-seq|Medullo|, Chromatin_Structure|DNase-seq|Fibrobl|, Chromatin_Structure|DNase-seq|Hsmmt|, Chromatin_Structure|DNase-seq|Hsmm|, Chromatin_Structure|DNase-seq|Heartoc|, Chromatin_Structure|DNase-seq|Fibroblgm03348|Lentimyod, Chromatin_Structure|DNase-seq|Fibroblgm03348|, Chromatin_Structure|DNase-seq|Hrpe|, Chromatin_Structure|DNase-seq|Lhcnm2|Diff4d, Chromatin_Structure…	0.642 Vascular endothelial growth factor levels // 0.638 Vascular endothelial growth factor levels in major depressive disorder // 0.493 Blood protein levels	CAPN11 | HSP90AB1 | MRPL14 | RSPH9 | SLC29A1 | SLC35B2 | SPATS1 | SUPT3H		C6orf223 CAPN11 HSP90AB1 MRPL14 RSPH9 SLC29A1 SLC35B2 SPATS1 SUPT3H TMEM63B VEGFA	C6orf223, MRPL14, RP5-1120P11.1, RP5-1120P11.3, SLC35B2	100616124, 101929683, 101929705, 221416, 347734, 64928	Ribosome:MRPL14	Glycosaminoglycan metabolism:SLC35B2 | Mitochondrial translation initiation:MRPL14 | Mitochondrial translation elongation:MRPL14 | Mitochondrial translation termination:MRPL14 | Metabolism of carbohydrates:SLC35B2 | Mitochondrial translation:MRPL14		sulfur compound transport:SLC35B2 | positive regulation of I-kappaB kinase/NF-kappaB signaling:SLC35B2 | sulfur compound biosynthetic process:SLC35B2 | regulation of I-kappaB kinase/NF-kappaB signaling:SLC35B2 | I-kappaB kinase/NF-kappaB signaling:SLC35B2 | mitochondrial translational elongation:MRPL14 | mitochondrial translational termination:MRPL14 | protein-containing complex disassembly:MRPL14		VEGF	14.6532	14.6532	0.149793		A	G	0.42402	0.42402	388	0.88	0	FALSE	0.0262537	0.314755	0.537766
rs4714719:43932612:C:T	FALSE		6	6p21.1	a224	43932612	rs7745184:43926638:T:G	0.895234	FALSE	C6orf223 (36 kb); MRPL14 (150 kb); TMEM63B (160 kb); VEGFA (180 kb)	C6orf223:protein_coding(KNOWN); MRPL14:protein_coding(KNOWN); TMEM63B:protein_coding(KNOWN); VEGFA:protein_coding(KNOWN)	C6orf223: chromosome 6 open reading frame 223 (36 kb)	-0.341369	-0.0591789	5.433	0.539039	0.33	0.38	0.27	3a	3	Motifs|PWM|UF1H3BETA|, Chromatin_Structure|DNase-seq|Gm12891|, Chromatin_Structure|DNase-seq|Hepg2|, Chromatin_Structure|DNase-seq|Medullo|, Protein_Binding|ChIP-seq|EGR1|K562|	0.722 Vascular endothelial growth factor levels // 0.711 Vascular endothelial growth factor levels in major depressive disorder // 0.57 Blood protein levels	CAPN11 | HSP90AB1 | MRPL14 | RSPH9 | SLC29A1 | SLC35B2 | SPATS1 | SUPT3H		C6orf223 CAPN11 HSP90AB1 MRPL14 RSPH9 SLC29A1 SLC35B2 SPATS1 SUPT3H TMEM63B VEGFA	C6orf223, MRPL14, RP5-1120P11.1, RP5-1120P11.3, SLC35B2	100616124, 101929683, 101929705, 221416, 347734, 64928	Ribosome:MRPL14	Glycosaminoglycan metabolism:SLC35B2 | Mitochondrial translation initiation:MRPL14 | Mitochondrial translation elongation:MRPL14 | Mitochondrial translation termination:MRPL14 | Metabolism of carbohydrates:SLC35B2 | Mitochondrial translation:MRPL14		sulfur compound transport:SLC35B2 | positive regulation of I-kappaB kinase/NF-kappaB signaling:SLC35B2 | sulfur compound biosynthetic process:SLC35B2 | regulation of I-kappaB kinase/NF-kappaB signaling:SLC35B2 | I-kappaB kinase/NF-kappaB signaling:SLC35B2 | mitochondrial translational elongation:MRPL14 | mitochondrial translational termination:MRPL14 | protein-containing complex disassembly:MRPL14		VEGF	14.3578	14.3578	0.146847		C	T	0.457038	0.457038	388	0.909	0	FALSE	0.0247815	0.314166	0.518063
rs9462949:43931347:G:A	FALSE		6	6p21.1	a224	43931347	rs7745184:43926638:T:G	0.971593	FALSE	C6orf223 (37 kb); MRPL14 (150 kb); TMEM63B (160 kb); VEGFA (180 kb)	C6orf223:protein_coding(KNOWN); MRPL14:protein_coding(KNOWN); TMEM63B:protein_coding(KNOWN); VEGFA:protein_coding(KNOWN)	C6orf223: chromosome 6 open reading frame 223 (37 kb)	-0.217333	0.215963	3.395	0.148866	0.12	0.2	0.03	5	5	Motifs|PWM|Irx6|, Motifs|PWM|POU2F2|, Protein_Binding|ChIP-seq|IRF1|K562|ifng30, Protein_Binding|ChIP-seq|EP300|K562|, Protein_Binding|ChIP-seq|BACH1|H1-hESC|, Protein_Binding|ChIP-seq|JUN|K562|ifng30, Protein_Binding|ChIP-seq|MAFK|HepG2|, Protein_Binding|ChIP-seq|MAFK|K562|, Protein_Binding|ChIP-seq|NR2F2|K562|, Protein_Binding|ChIP-seq|TEAD4|K562|	0.634 Vascular endothelial growth factor levels // 0.63 Vascular endothelial growth factor levels in major depressive disorder // 0.487 Blood protein levels	CAPN11 | HSP90AB1 | MRPL14 | RSPH9 | SLC29A1 | SLC35B2 | SPATS1 | SUPT3H		C6orf223 CAPN11 HSP90AB1 MRPL14 RSPH9 SLC29A1 SLC35B2 SPATS1 SUPT3H TMEM63B VEGFA	C6orf223, MRPL14, RP5-1120P11.1, RP5-1120P11.3, SLC35B2	100616124, 101929683, 101929705, 221416, 347734, 64928	Ribosome:MRPL14	Glycosaminoglycan metabolism:SLC35B2 | Mitochondrial translation initiation:MRPL14 | Mitochondrial translation elongation:MRPL14 | Mitochondrial translation termination:MRPL14 | Metabolism of carbohydrates:SLC35B2 | Mitochondrial translation:MRPL14		sulfur compound transport:SLC35B2 | positive regulation of I-kappaB kinase/NF-kappaB signaling:SLC35B2 | sulfur compound biosynthetic process:SLC35B2 | regulation of I-kappaB kinase/NF-kappaB signaling:SLC35B2 | I-kappaB kinase/NF-kappaB signaling:SLC35B2 | mitochondrial translational elongation:MRPL14 | mitochondrial translational termination:MRPL14 | protein-containing complex disassembly:MRPL14		VEGF	13.9086	13.9086	0.142349		G	A	0.42778	0.42778	388	0.879	0	FALSE	0.0177273	0.302222	0.522814
rs13201539:43931713:C:A	FALSE		6	6p21.1	a224	43931713	rs7745184:43926638:T:G	0.87253	FALSE	C6orf223 (37 kb); MRPL14 (150 kb); TMEM63B (160 kb); VEGFA (180 kb)	C6orf223:protein_coding(KNOWN); MRPL14:protein_coding(KNOWN); TMEM63B:protein_coding(KNOWN); VEGFA:protein_coding(KNOWN)	C6orf223: chromosome 6 open reading frame 223 (37 kb)	-0.410552	-0.237119	0.496	0.113173	0.26	0.21	0.01	6	6	6:Motifs|PWM|Irx-3|, Motifs|PWM|Irx4|, Motifs|PWM|Tbp|, Motifs|PWM|FOXP1|;6:NA	0.648 Vascular endothelial growth factor levels // 0.638 Vascular endothelial growth factor levels in major depressive disorder // 0.51 Blood protein levels	CAPN11 | HSP90AB1 | MRPL14 | RSPH9 | SLC29A1 | SLC35B2 | SPATS1 | SUPT3H		C6orf223 CAPN11 HSP90AB1 MRPL14 RSPH9 SLC29A1 SLC35B2 SPATS1 SUPT3H TMEM63B VEGFA	C6orf223, MRPL14, RP5-1120P11.1, RP5-1120P11.3, SLC35B2	100616124, 101929683, 101929705, 221416, 347734, 64928	Ribosome:MRPL14	Glycosaminoglycan metabolism:SLC35B2 | Mitochondrial translation initiation:MRPL14 | Mitochondrial translation elongation:MRPL14 | Mitochondrial translation termination:MRPL14 | Metabolism of carbohydrates:SLC35B2 | Mitochondrial translation:MRPL14		sulfur compound transport:SLC35B2 | positive regulation of I-kappaB kinase/NF-kappaB signaling:SLC35B2 | sulfur compound biosynthetic process:SLC35B2 | regulation of I-kappaB kinase/NF-kappaB signaling:SLC35B2 | I-kappaB kinase/NF-kappaB signaling:SLC35B2 | mitochondrial translational elongation:MRPL14 | mitochondrial translational termination:MRPL14 | protein-containing complex disassembly:MRPL14		VEGF	13.7381	13.7381	0.140636		C	A	0.470196	0.470196	388	0.877	0	FALSE	0.0386495	0.259501	0.520551
rs13201415:43931712:A:T	FALSE		6	6p21.1	a224	43931712	rs7745184:43926638:T:G	0.872348	FALSE	C6orf223 (37 kb); MRPL14 (150 kb); TMEM63B (160 kb); VEGFA (180 kb)	C6orf223:protein_coding(KNOWN); MRPL14:protein_coding(KNOWN); TMEM63B:protein_coding(KNOWN); VEGFA:protein_coding(KNOWN)	C6orf223: chromosome 6 open reading frame 223 (37 kb)	-0.35793	-0.22718	0.254	0.0689624	0.2	0.19	0.01	6	6		0.648 Vascular endothelial growth factor levels // 0.638 Vascular endothelial growth factor levels in major depressive disorder // 0.51 Blood protein levels	CAPN11 | HSP90AB1 | MRPL14 | RSPH9 | SLC29A1 | SLC35B2 | SPATS1 | SUPT3H		C6orf223 CAPN11 HSP90AB1 MRPL14 RSPH9 SLC29A1 SLC35B2 SPATS1 SUPT3H TMEM63B VEGFA	C6orf223, MRPL14, RP5-1120P11.1, RP5-1120P11.3, SLC35B2	100616124, 101929683, 101929705, 221416, 347734, 64928	Ribosome:MRPL14	Glycosaminoglycan metabolism:SLC35B2 | Mitochondrial translation initiation:MRPL14 | Mitochondrial translation elongation:MRPL14 | Mitochondrial translation termination:MRPL14 | Metabolism of carbohydrates:SLC35B2 | Mitochondrial translation:MRPL14		sulfur compound transport:SLC35B2 | positive regulation of I-kappaB kinase/NF-kappaB signaling:SLC35B2 | sulfur compound biosynthetic process:SLC35B2 | regulation of I-kappaB kinase/NF-kappaB signaling:SLC35B2 | I-kappaB kinase/NF-kappaB signaling:SLC35B2 | mitochondrial translational elongation:MRPL14 | mitochondrial translational termination:MRPL14 | protein-containing complex disassembly:MRPL14		VEGF	13.7309	13.7309	0.140564		A	T	0.470231	0.470231	388	0.876	0	FALSE	0.038645	0.259295	0.520399
rs6916540:43919416:C:T	FALSE		6	6p21.1	a224	43919416	rs7745184:43926638:T:G	0.805121	FALSE	C6orf223 (49 kb); MRPL14 (160 kb); VEGFA (170 kb); TMEM63B (180 kb)	C6orf223:protein_coding(KNOWN); MRPL14:protein_coding(KNOWN); VEGFA:protein_coding(KNOWN); TMEM63B:protein_coding(KNOWN)	C6orf223: chromosome 6 open reading frame 223 (49 kb)	0.227648	1.87126	2.75	0.317929	0.26	0.48	0.29	2b	2	Motifs|Footprinting|HSF1|Chorion, Motifs|PWM|HSF1|, Chromatin_Structure|DNase-seq|Mcf7|, Chromatin_Structure|DNase-seq|Mcf7|Hypoxlac, Chromatin_Structure|DNase-seq|Ipscwru1|, Chromatin_Structure|DNase-seq|T47d|Est10nm30m, Chromatin_Structure|DNase-seq|T47d|, Chromatin_Structure|DNase-seq|Medullo|, Chromatin_Structure|DNase-seq|Medullod341|, Chromatin_Structure|DNase-seq|Hepg2|, Chromatin_Structur…	0.696 Blood protein levels // 0.61 Vascular endothelial growth factor levels // 0.606 Vascular endothelial growth factor levels in major depressive disorder	CAPN11 | HSP90AB1 | MRPL14 | RSPH9 | SLC29A1 | SLC35B2 | SPATS1 | SUPT3H		C6orf223 CAPN11 HSP90AB1 MRPL14 RSPH9 SLC29A1 SLC35B2 SPATS1 SUPT3H TMEM63B VEGFA	C6orf223, CAPN11, MRPL14, RP5-1120P11.1, RP5-1120P11.3, SLC35B2	100616124, 101929683, 101929705, 11131, 221416, 347734, 64928	Ribosome:MRPL14	Glycosaminoglycan metabolism:SLC35B2 | Mitochondrial translation initiation:MRPL14 | Mitochondrial translation elongation:MRPL14 | Mitochondrial translation termination:MRPL14 | Metabolism of carbohydrates:SLC35B2 | Mitochondrial translation:MRPL14 | Extracellular matrix organization:CAPN11		sulfur compound transport:SLC35B2 | positive regulation of I-kappaB kinase/NF-kappaB signaling:SLC35B2 | sulfur compound biosynthetic process:SLC35B2 | regulation of I-kappaB kinase/NF-kappaB signaling:SLC35B2 | I-kappaB kinase/NF-kappaB signaling:SLC35B2 | mitochondrial translational elongation:MRPL14 | mitochondrial translational termination:MRPL14 | protein-containing complex disassembly:MRPL14		VEGF	12.833	12.833	0.131494		C	T	0.416663	0.416663	388	0.902	0	FALSE	0.046366	0.342395	0.50257
rs9472158:43918897:G:A	FALSE		6	6p21.1	a224	43918897	rs7745184:43926638:T:G	0.820989	FALSE	C6orf223 (49 kb); MRPL14 (160 kb); VEGFA (160 kb); TMEM63B (180 kb)	C6orf223:protein_coding(KNOWN); MRPL14:protein_coding(KNOWN); VEGFA:protein_coding(KNOWN); TMEM63B:protein_coding(KNOWN)	C6orf223: chromosome 6 open reading frame 223 (49 kb)	-0.226105	-0.0780839	2.431	0.211841	0.24	0.48	0.29	2b	2	Motifs|PWM|BLIMP1|, Motifs|Footprinting|BLIMP1|Hepg2, Motifs|Footprinting|BLIMP1|H1hesc, Chromatin_Structure|DNase-seq|Mcf7|, Chromatin_Structure|DNase-seq|Mcf7|Hypoxlac, Chromatin_Structure|DNase-seq|Hepg2|, Chromatin_Structure|DNase-seq|Huh7|, Chromatin_Structure|FAIRE|Helas3|Ifna4h, Chromatin_Structure|DNase-seq|Hs27a|, Chromatin_Structure|DNase-seq|Mcf7|Hypoxlaccon, Protein_Binding|ChIP-seq|H…	0.643 Blood protein levels // 0.574 Vascular endothelial growth factor levels // 0.565 Vascular endothelial growth factor levels in major depressive disorder	CAPN11 | HSP90AB1 | MRPL14 | RSPH9 | SLC29A1 | SLC35B2 | SPATS1 | SUPT3H		C6orf223 CAPN11 HSP90AB1 MRPL14 RSPH9 SLC29A1 SLC35B2 SPATS1 SUPT3H TMEM63B VEGFA	C6orf223, CAPN11, MRPL14, RP5-1120P11.1, RP5-1120P11.3, SLC35B2	100616124, 101929683, 101929705, 11131, 221416, 347734, 64928	Ribosome:MRPL14	Glycosaminoglycan metabolism:SLC35B2 | Mitochondrial translation initiation:MRPL14 | Mitochondrial translation elongation:MRPL14 | Mitochondrial translation termination:MRPL14 | Metabolism of carbohydrates:SLC35B2 | Mitochondrial translation:MRPL14 | Extracellular matrix organization:CAPN11		sulfur compound transport:SLC35B2 | positive regulation of I-kappaB kinase/NF-kappaB signaling:SLC35B2 | sulfur compound biosynthetic process:SLC35B2 | regulation of I-kappaB kinase/NF-kappaB signaling:SLC35B2 | I-kappaB kinase/NF-kappaB signaling:SLC35B2 | mitochondrial translational elongation:MRPL14 | mitochondrial translational termination:MRPL14 | protein-containing complex disassembly:MRPL14		VEGF	12.4516	12.4516	0.127615		G	A	0.403439	0.403439	388	0.89	0	FALSE	0.0405988	0.365375	0.517854
rs6916314:43919162:G:A	FALSE		6	6p21.1	a224	43919162	rs7745184:43926638:T:G	0.831439	FALSE	C6orf223 (49 kb); MRPL14 (160 kb); VEGFA (160 kb); TMEM63B (180 kb)	C6orf223:protein_coding(KNOWN); MRPL14:protein_coding(KNOWN); VEGFA:protein_coding(KNOWN); TMEM63B:protein_coding(KNOWN)	C6orf223: chromosome 6 open reading frame 223 (49 kb)	0.208992	0.701822	6.638	0.88769	0.39	0.44	0.45	4	4	Motifs|Footprinting||HepG2, Chromatin_Structure|DNase-seq|Mcf7|, Chromatin_Structure|DNase-seq|Mcf7|Hypoxlac, Chromatin_Structure|DNase-seq|Ipscwru1|, Chromatin_Structure|DNase-seq|T47d|Est10nm30m, Chromatin_Structure|DNase-seq|T47d|, Chromatin_Structure|DNase-seq|Medullo|, Chromatin_Structure|DNase-seq|Medullod341|, Chromatin_Structure|DNase-seq|Hepg2|, Chromatin_Structure|DNase-seq|Ips|, Chroma…	0.646 Blood protein levels // 0.576 Vascular endothelial growth factor levels // 0.566 Vascular endothelial growth factor levels in major depressive disorder	CAPN11 | HSP90AB1 | MRPL14 | RSPH9 | SLC29A1 | SLC35B2 | SPATS1 | SUPT3H		C6orf223 CAPN11 HSP90AB1 MRPL14 RSPH9 SLC29A1 SLC35B2 SPATS1 SUPT3H TMEM63B VEGFA	C6orf223, MRPL14, RP5-1120P11.1, RP5-1120P11.3, SLC35B2	100616124, 101929683, 101929705, 221416, 347734, 64928	Ribosome:MRPL14	Glycosaminoglycan metabolism:SLC35B2 | Mitochondrial translation initiation:MRPL14 | Mitochondrial translation elongation:MRPL14 | Mitochondrial translation termination:MRPL14 | Metabolism of carbohydrates:SLC35B2 | Mitochondrial translation:MRPL14		sulfur compound transport:SLC35B2 | positive regulation of I-kappaB kinase/NF-kappaB signaling:SLC35B2 | sulfur compound biosynthetic process:SLC35B2 | regulation of I-kappaB kinase/NF-kappaB signaling:SLC35B2 | I-kappaB kinase/NF-kappaB signaling:SLC35B2 | mitochondrial translational elongation:MRPL14 | mitochondrial translational termination:MRPL14 | protein-containing complex disassembly:MRPL14		VEGF	12.1789	12.1789	0.124833		G	A	0.405865	0.405865	388	0.889	0	FALSE	0.0352518	0.352628	0.50486
rs13206012:43932763:G:A	FALSE		6	6p21.1	a224	43932763	rs13206012:43932763:G:A	1	TRUE	C6orf223 (36 kb); MRPL14 (150 kb); TMEM63B (160 kb); VEGFA (180 kb)	C6orf223:protein_coding(KNOWN); MRPL14:protein_coding(KNOWN); TMEM63B:protein_coding(KNOWN); VEGFA:protein_coding(KNOWN)	C6orf223: chromosome 6 open reading frame 223 (36 kb)	0.00929043	0.109331	3.44	0.785414	0.26	0.47	0.19	5	5	Chromatin_Structure|DNase-seq|Hepg2|, Chromatin_Structure|DNase-seq|Huh7|, Chromatin_Structure|DNase-seq|Rwpe1|, Chromatin_Structure|DNase-seq|Ips|, Chromatin_Structure|DNase-seq|K562|Znf2c10c5, Chromatin_Structure|DNase-seq|K562|, Chromatin_Structure|DNase-seq|Th1|	0.668 Vascular endothelial growth factor levels // 0.66 Vascular endothelial growth factor levels in major depressive disorder // 0.582 Blood protein levels	CAPN11 | HSP90AB1 | KLHDC3 | MRPL14 | RSPH9 | SLC29A1 | SLC35B2		C6orf223 CAPN11 HSP90AB1 KLHDC3 MRPL14 RSPH9 SLC29A1 SLC35B2 TMEM63B VEGFA	C6orf223, CAPN11, MRPL14, RP5-1120P11.1, RP5-1120P11.3, SLC35B2	100616124, 101929683, 101929705, 11131, 221416, 347734, 64928	Ribosome:MRPL14	Glycosaminoglycan metabolism:SLC35B2 | Mitochondrial translation initiation:MRPL14 | Mitochondrial translation elongation:MRPL14 | Mitochondrial translation termination:MRPL14 | Metabolism of carbohydrates:SLC35B2 | Mitochondrial translation:MRPL14 | Extracellular matrix organization:CAPN11		sulfur compound transport:SLC35B2 | positive regulation of I-kappaB kinase/NF-kappaB signaling:SLC35B2 | sulfur compound biosynthetic process:SLC35B2 | regulation of I-kappaB kinase/NF-kappaB signaling:SLC35B2 | I-kappaB kinase/NF-kappaB signaling:SLC35B2 | mitochondrial translational elongation:MRPL14 | mitochondrial translational termination:MRPL14 | protein-containing complex disassembly:MRPL14		VEGF	11.5864	11.5864	0.118762		A	G	0.355996	0.355996	388	0.885	0	FALSE	-0.000472681	-0.199862	-0.469437
rs729391:43917892:C:T	FALSE		6	6p21.1	a224	43917892	rs729391:43917892:C:T	1	TRUE	C6orf223 (50 kb); MRPL14 (160 kb); VEGFA (160 kb); TMEM63B (180 kb)	C6orf223:protein_coding(KNOWN); MRPL14:protein_coding(KNOWN); VEGFA:protein_coding(KNOWN); TMEM63B:protein_coding(KNOWN)	C6orf223: chromosome 6 open reading frame 223 (50 kb)	-0.225959	-0.135906	1.323	0.663841	0.44	0.49	0.37	4	4	Chromatin_Structure|DNase-seq|Th1|, Protein_Binding|ChIP-seq|GATA1|CD36|shLuc	0.534 Blood protein levels // 0.496 Vascular endothelial growth factor levels in major depressive disorder // 0.494 Vascular endothelial growth factor levels	CAPN11 | HSP90AB1 | MRPL14 | RSPH9 | SLC29A1 | SLC35B2 | SPATS1 | SUPT3H		C6orf223 CAPN11 HSP90AB1 MRPL14 RSPH9 SLC29A1 SLC35B2 SPATS1 SUPT3H TMEM63B VEGFA	C6orf223, MRPL14, RP5-1120P11.1, RP5-1120P11.3, SLC35B2	100616124, 101929683, 101929705, 221416, 347734, 64928	Ribosome:MRPL14	Glycosaminoglycan metabolism:SLC35B2 | Mitochondrial translation initiation:MRPL14 | Mitochondrial translation elongation:MRPL14 | Mitochondrial translation termination:MRPL14 | Metabolism of carbohydrates:SLC35B2 | Mitochondrial translation:MRPL14		sulfur compound transport:SLC35B2 | positive regulation of I-kappaB kinase/NF-kappaB signaling:SLC35B2 | sulfur compound biosynthetic process:SLC35B2 | regulation of I-kappaB kinase/NF-kappaB signaling:SLC35B2 | I-kappaB kinase/NF-kappaB signaling:SLC35B2 | mitochondrial translational elongation:MRPL14 | mitochondrial translational termination:MRPL14 | protein-containing complex disassembly:MRPL14		VEGF	10.4977	10.4977	0.107513		C	T	0.378299	0.378299	388	0.899	0	FALSE	0.0404422	0.304331	0.482782
rs9369434:43918407:C:T	FALSE		6	6p21.1	a224	43918407	rs9369434:43918407:C:T	1	TRUE	C6orf223 (50 kb); MRPL14 (160 kb); VEGFA (160 kb); TMEM63B (180 kb)	C6orf223:protein_coding(KNOWN); MRPL14:protein_coding(KNOWN); VEGFA:protein_coding(KNOWN); TMEM63B:protein_coding(KNOWN)	C6orf223: chromosome 6 open reading frame 223 (50 kb)	-0.144107	-0.168475	3.392	0.69445	0.31	0.42	0.24	5	5	Chromatin_Structure|DNase-seq|Lncap|	0.701 Blood protein levels // 0.594 Vascular endothelial growth factor levels // 0.586 Vascular endothelial growth factor levels in major depressive disorder	CAPN11 | HSP90AB1 | MRPL14 | RSPH9 | SLC29A1 | SLC35B2 | SPATS1 | SUPT3H		C6orf223 CAPN11 HSP90AB1 MRPL14 RSPH9 SLC29A1 SLC35B2 SPATS1 SUPT3H TMEM63B VEGFA	C6orf223, CAPN11, MRPL14, RP5-1120P11.1, RP5-1120P11.3	101929683, 101929705, 11131, 221416, 64928	Ribosome:MRPL14	Mitochondrial translation initiation:MRPL14 | Mitochondrial translation elongation:MRPL14 | Mitochondrial translation termination:MRPL14 | Mitochondrial translation:MRPL14 | Extracellular matrix organization:CAPN11		mitochondrial translational elongation:MRPL14 | mitochondrial translational termination:MRPL14 | protein-containing complex disassembly:MRPL14		VEGF	9.91003	9.91003	0.101393		T	C	0.422782	0.422782	388	0.823	0	FALSE	-0.0189889	-0.230093	-0.368012
rs7739450:43911598:G:A	FALSE		6	6p21.1	a224	43911598	rs7739450:43911598:G:A	1	TRUE	C6orf223 (57 kb); VEGFA (160 kb); MRPL14 (170 kb); TMEM63B (180 kb)	C6orf223:protein_coding(KNOWN); VEGFA:protein_coding(KNOWN); MRPL14:protein_coding(KNOWN); TMEM63B:protein_coding(KNOWN)	C6orf223: chromosome 6 open reading frame 223 (57 kb)	0.38077	0.00340637	10.84	0.73714	0.37	0.55	0.3	4	4	Chromatin_Structure|DNase-seq|Urotsa|, Chromatin_Structure|DNase-seq|UrotsaUt189|, Chromatin_Structure|DNase-seq|Colo829|, Chromatin_Structure|DNase-seq|Wi38|, Chromatin_Structure|DNase-seq|Wi38|Ohtam, Chromatin_Structure|DNase-seq|Hsmm|, Chromatin_Structure|DNase-seq|Ecc1|Dm002p1h, Chromatin_Structure|DNase-seq|Ecc1|Est10nm30m, Chromatin_Structure|DNase-seq|Hmec|, Chromatin_Structure|DNase-seq|I…	0.768 Blood protein levels // 0.665 Vascular endothelial growth factor levels // 0.656 Vascular endothelial growth factor levels in major depressive disorder	CAPN11 | HSP90AB1 | MRPL14 | SLC29A1 | SLC35B2 | SPATS1 | SUPT3H		C6orf223 CAPN11 HSP90AB1 MRPL14 SLC29A1 SLC35B2 SPATS1 SUPT3H TMEM63B VEGFA	C6orf223, CAPN11, MRPL14, RP5-1120P11.1, RP5-1120P11.3, VEGFA	101929683, 101929705, 11131, 221416, 64928, 7422	Ribosome:MRPL14 | Rheumatoid arthritis:VEGFA | Ras signaling pathway:VEGFA	Transcriptional regulation by the AP-2 (TFAP2) family of transcription factors:VEGFA | Mitochondrial translation initiation:MRPL14 | Mitochondrial translation elongation:MRPL14 | Mitochondrial translation termination:MRPL14 | Mitochondrial translation:MRPL14 | Extracellular matrix organization:CAPN11	thrombocytosis:VEGFA | polycythemia:VEGFA | uterine benign neoplasm:VEGFA | uterine fibroid:VEGFA | bone marrow disease:VEGFA | female reproductive organ benign neoplasm:VEGFA | reproductive organ benign neoplasm:VEGFA | hemorrhagic disease:VEGFA | atopic dermatitis:VEGFA | non-small cell lung carcinoma:VEGFA | purpura:VEGFA | blood coagulation disease:VEGFA | lymphoid leukemia:VEGFA | macular de…	regulation of leukocyte chemotaxis:VEGFA | positive regulation of cell-matrix adhesion:VEGFA | regulation of cell-matrix adhesion:VEGFA | positive regulation of cell-substrate adhesion:VEGFA | regulation of cell-substrate adhesion:VEGFA | platelet-derived growth factor receptor signaling pathway:VEGFA | regulation of focal adhesion assembly:VEGFA | regulation of cell-substrate junction assembly:V…		VEGF	9.71606	9.71606	0.0993653		A	G	0.475383	0.475383	388	0.92	0	FALSE	-0.00836265	-0.322041	-0.413897
rs2006957:43913243:T:C	FALSE		6	6p21.1	a224	43913243	rs2006957:43913243:T:C	1	TRUE	C6orf223 (55 kb); VEGFA (160 kb); MRPL14 (170 kb); TMEM63B (180 kb)	C6orf223:protein_coding(KNOWN); VEGFA:protein_coding(KNOWN); MRPL14:protein_coding(KNOWN); TMEM63B:protein_coding(KNOWN)	C6orf223: chromosome 6 open reading frame 223 (55 kb)	-0.28584	-0.04522	1.484	0.736316	0.3	0.28	0.2	5	5	Motifs|PWM|FOXP1|, Motifs|PWM|FOXP1|, Motifs|PWM|FOXL1|, Protein_Binding|ChIP-seq|SETDB1|U2OS|, Protein_Binding|ChIP-seq|SETDB1|U2OS|	0.36 Blood protein levels // 0.356 Vascular endothelial growth factor levels // 0.343 Vascular endothelial growth factor levels in major depressive disorder	CAPN11 | HSP90AB1 | MRPL14 | RSPH9 | SLC29A1 | SLC35B2 | SPATS1 | SUPT3H		C6orf223 CAPN11 HSP90AB1 MRPL14 RSPH9 SLC29A1 SLC35B2 SPATS1 SUPT3H TMEM63B VEGFA	C6orf223, MRPL14, RP5-1120P11.1, RP5-1120P11.3, SLC35B2, VEGFA	100616124, 101929683, 101929705, 221416, 347734, 64928, 7422	Ribosome:MRPL14 | Rheumatoid arthritis:VEGFA | Ras signaling pathway:VEGFA	Transcriptional regulation by the AP-2 (TFAP2) family of transcription factors:VEGFA | Glycosaminoglycan metabolism:SLC35B2 | Mitochondrial translation initiation:MRPL14 | Mitochondrial translation elongation:MRPL14 | Mitochondrial translation termination:MRPL14 | Metabolism of carbohydrates:SLC35B2 | Mitochondrial translation:MRPL14	thrombocytosis:VEGFA | polycythemia:VEGFA | uterine benign neoplasm:VEGFA | uterine fibroid:VEGFA | bone marrow disease:VEGFA | female reproductive organ benign neoplasm:VEGFA | reproductive organ benign neoplasm:VEGFA | hemorrhagic disease:VEGFA | atopic dermatitis:VEGFA | non-small cell lung carcinoma:VEGFA | purpura:VEGFA | blood coagulation disease:VEGFA | lymphoid leukemia:VEGFA | macular de…	regulation of leukocyte chemotaxis:VEGFA | positive regulation of cell-matrix adhesion:VEGFA | regulation of cell-matrix adhesion:VEGFA | positive regulation of cell-substrate adhesion:VEGFA | regulation of cell-substrate adhesion:VEGFA | platelet-derived growth factor receptor signaling pathway:VEGFA | regulation of focal adhesion assembly:VEGFA | regulation of cell-substrate junction assembly:V…		VEGF	7.05713	7.05713	0.07123		T	C	0.295696	0.295696	388	0.942	0	FALSE	0.0407612	0.337525	0.460871
rs9369433:43914550:C:A	FALSE		6	6p21.1	a224	43914550	rs2006957:43913243:T:C	0.892959	FALSE	C6orf223 (54 kb); VEGFA (160 kb); MRPL14 (170 kb); TMEM63B (180 kb)	C6orf223:protein_coding(KNOWN); VEGFA:protein_coding(KNOWN); MRPL14:protein_coding(KNOWN); TMEM63B:protein_coding(KNOWN)	C6orf223: chromosome 6 open reading frame 223 (54 kb)	-0.172611	0.343279	3.759	0.470359	0.36	0.33	0.22	4	4	Motifs|Footprinting|NF-E2|K562, Chromatin_Structure|DNase-seq|K562|, Chromatin_Structure|DNase-seq|K562|Sahactrl, Chromatin_Structure|DNase-seq|K562|Znf4c50c4, Chromatin_Structure|DNase-seq|K562|Znfe103c6, Chromatin_Structure|DNase-seq|K562|Znf2c10c5, Chromatin_Structure|DNase-seq|K562|Znff41b2, Protein_Binding|ChIP-seq|POLR2A|PBDE|, Protein_Binding|ChIP-seq|TRIM28|K562|, Protein_Binding|ChIP-seq…	0.326 Blood protein levels	CAPN11 | HSP90AB1 | MRPL14 | SLC29A1 | SLC35B2 | SPATS1 | SUPT3H		C6orf223 CAPN11 HSP90AB1 MRPL14 SLC29A1 SLC35B2 SPATS1 SUPT3H TMEM63B VEGFA	C6orf223, MRPL14, RP5-1120P11.1, RP5-1120P11.3, SLC35B2, VEGFA	100616124, 101929683, 101929705, 221416, 347734, 64928, 7422	Ribosome:MRPL14 | Rheumatoid arthritis:VEGFA | Ras signaling pathway:VEGFA	Transcriptional regulation by the AP-2 (TFAP2) family of transcription factors:VEGFA | Glycosaminoglycan metabolism:SLC35B2 | Mitochondrial translation initiation:MRPL14 | Mitochondrial translation elongation:MRPL14 | Mitochondrial translation termination:MRPL14 | Metabolism of carbohydrates:SLC35B2 | Mitochondrial translation:MRPL14	thrombocytosis:VEGFA | polycythemia:VEGFA | uterine benign neoplasm:VEGFA | uterine fibroid:VEGFA | bone marrow disease:VEGFA | female reproductive organ benign neoplasm:VEGFA | reproductive organ benign neoplasm:VEGFA | hemorrhagic disease:VEGFA | atopic dermatitis:VEGFA | non-small cell lung carcinoma:VEGFA | purpura:VEGFA | blood coagulation disease:VEGFA | lymphoid leukemia:VEGFA | macular de…	regulation of leukocyte chemotaxis:VEGFA | positive regulation of cell-matrix adhesion:VEGFA | regulation of cell-matrix adhesion:VEGFA | positive regulation of cell-substrate adhesion:VEGFA | regulation of cell-substrate adhesion:VEGFA | platelet-derived growth factor receptor signaling pathway:VEGFA | regulation of focal adhesion assembly:VEGFA | regulation of cell-substrate junction assembly:V…		VEGF	6.48292	6.48292	0.0650798		C	A	0.266999	0.266999	388	0.989	0	FALSE	0.0460825	0.305381	0.46213
rs7764227:43913988:G:T	FALSE		6	6p21.1	a224	43913988	rs2006957:43913243:T:C	0.892663	FALSE	C6orf223 (54 kb); VEGFA (160 kb); MRPL14 (170 kb); TMEM63B (180 kb)	C6orf223:protein_coding(KNOWN); VEGFA:protein_coding(KNOWN); MRPL14:protein_coding(KNOWN); TMEM63B:protein_coding(KNOWN)	C6orf223: chromosome 6 open reading frame 223 (54 kb)	-0.0600881	-0.0578739	1.495	0.691265	0.39	0.38	0.19	5	5	Chromatin_Structure|DNase-seq|Monocd14ro1746|, Chromatin_Structure|DNase-seq|Monocd14|	0.326 Blood protein levels	CAPN11 | HSP90AB1 | MRPL14 | SLC29A1 | SLC35B2 | SPATS1 | SUPT3H		C6orf223 CAPN11 HSP90AB1 MRPL14 SLC29A1 SLC35B2 SPATS1 SUPT3H TMEM63B VEGFA	C6orf223, MRPL14, RP5-1120P11.1, RP5-1120P11.3, SLC35B2, VEGFA	100616124, 101929683, 101929705, 221416, 347734, 64928, 7422	Ribosome:MRPL14 | Rheumatoid arthritis:VEGFA | Ras signaling pathway:VEGFA	Transcriptional regulation by the AP-2 (TFAP2) family of transcription factors:VEGFA | Glycosaminoglycan metabolism:SLC35B2 | Mitochondrial translation initiation:MRPL14 | Mitochondrial translation elongation:MRPL14 | Mitochondrial translation termination:MRPL14 | Metabolism of carbohydrates:SLC35B2 | Mitochondrial translation:MRPL14	thrombocytosis:VEGFA | polycythemia:VEGFA | uterine benign neoplasm:VEGFA | uterine fibroid:VEGFA | bone marrow disease:VEGFA | female reproductive organ benign neoplasm:VEGFA | reproductive organ benign neoplasm:VEGFA | hemorrhagic disease:VEGFA | atopic dermatitis:VEGFA | non-small cell lung carcinoma:VEGFA | purpura:VEGFA | blood coagulation disease:VEGFA | lymphoid leukemia:VEGFA | macular de…	regulation of leukocyte chemotaxis:VEGFA | positive regulation of cell-matrix adhesion:VEGFA | regulation of cell-matrix adhesion:VEGFA | positive regulation of cell-substrate adhesion:VEGFA | regulation of cell-substrate adhesion:VEGFA | platelet-derived growth factor receptor signaling pathway:VEGFA | regulation of focal adhesion assembly:VEGFA | regulation of cell-substrate junction assembly:V…		VEGF	6.29194	6.29194	0.0630295		G	T	0.266753	0.266753	388	1	2	FALSE	0.0446122	0.300734	0.452709
rs191448458:93389344:C:T	FALSE		6	6q16.1	a235	93389344	rs191448458:93389344:C:T	1	TRUE	ATF1P1 (210 kb)	ATF1P1:pseudogene(KNOWN)	ATF1P1: activating transcription factor 1 pseudogene 1 (210 kb)	-0.22037	-0.117856	8.37	0.896568	0.48	0.1	0.08	3a	3		NA			ATF1P1								IL_8	6.35332	6.35332	0.0646577		T	C	0.0158717	0.0158717	382	0.964	0	FALSE	0.130873	0.0301015	-0.0796808
rs190835342:165640327:G:A	FALSE		6	6q27	a249	165640327	rs190835342:165640327:G:A	1	TRUE	C6orf118 (53 kb); PDE10A (100 kb); RNA5SP226 (180 kb)	C6orf118:protein_coding(KNOWN); PDE10A:protein_coding(KNOWN); RNA5SP226:rRNA(KNOWN)	C6orf118: chromosome 6 open reading frame 118 (53 kb)	-0.606453	-0.255267	0.678	0.793218	0.19	0.12	0.07	7	7		NA			C6orf118 PDE10A RNA5SP226	C6orf118, PDE10A	10846, 168090	Morphine addiction:PDE10A | Purine metabolism:PDE10A			cyclic nucleotide catabolic process:PDE10A | cAMP metabolic process:PDE10A | purine ribonucleotide catabolic process:PDE10A | ribonucleotide catabolic process:PDE10A | cyclic nucleotide metabolic process:PDE10A | purine nucleotide catabolic process:PDE10A | purine-containing compound catabolic process:PDE10A | nucleotide catabolic process:PDE10A | nucleoside phosphate catabolic process:PDE10A | n…	Tissues; Epithelium:C6orf118	MIP_1A	6.23702	6.23702	0.0655519		A	G	0.0125227	0.0125227	369	0.805	0	FALSE	0.139125	1.37653	1.3489
rs7795250:47756307:C:A	FALSE		7	7p12.3	a260	47756307	rs7795250:47756307:C:A	1	TRUE	HUS1 (0 kb, intron/NMD transcript/MODIFIER | intron/Intron/MODIFIER); LINC00525 (45 kb); C7orf65 (55 kb); PKD1L1 (58 kb)	HUS1:protein_coding(KNOWN); LINC00525:antisense(KNOWN); C7orf65:protein_coding(KNOWN); PKD1L1:protein_coding(KNOWN)	HUS1: HUS1 checkpoint homolog (S. pombe) (0 kb)	-0.440804	-0.234337	2.677	0.835231	0.27	0.19	0.01	7	7		NA	AC095067.1 | LINC00525 | TNS3 | UPP1		AC095067.1 C7orf65 C7orf69 HUS1 LINC00525 PKD1L1 TNS3 UPP1	C7orf65, HUS1, LINC00525, PKD1L1, TNS3	168507, 3364, 401335, 64759, 84847		HDR through Single Strand Annealing (SSA):HUS1 | MET promotes cell motility:TNS3 | Signaling by MET:TNS3 | HDR through Homologous Recombination (HRR) or Single Strand Annealing (SSA):HUS1 | Homology Directed Repair:HUS1 | DNA Double-Strand Break Repair:HUS1		detection of external stimulus:PKD1L1 | detection of abiotic stimulus:PKD1L1 | calcium ion transmembrane transport:PKD1L1 | negative regulation of mitotic cell cycle:HUS1		IL_12	6.02698	6.02698	0.0607895		A	C	0.242819	0.242819	384	0.968	0	FALSE	-0.0405317	-0.366429	-0.503673
rs145122044:76485397:T:C	FALSE		7	7q11.23	a266	76485397	rs145122044:76485397:T:C	1	TRUE	UPK3B (0 kb, intron/Intron/MODIFIER); FDPSP7 (110 kb); DTX2P1 (120 kb); DTX2P1-UPK3BP1-PMS2P11 (120 kb)	UPK3B:protein_coding(KNOWN); FDPSP7:pseudogene(KNOWN); DTX2P1:pseudogene(KNOWN); DTX2P1-UPK3BP1-PMS2P11:processed_transcript(KNOWN)	UPK3B: uroplakin 3B (0 kb)	-0.196034	-0.202866	4.507	0.662766	0.47	0.26	0.03	7	7	Chromatin_Structure|FAIRE|Nhek|	NA	CCDC146 | DTX2 | DTX2P1-UPK3BP1-PMS2P11 | PION | POMZP3 | PTPN12 | RHBDD2 | RSBN1L | STYXL1 | YWHAG		CCDC146 DTX2 DTX2P1 DTX2P1-UPK3BP1-PMS2P11 FAM185BP FDPSP7 PION PMS2P11 PMS2P9 POMZP3 PTPN12 RHBDD2 RSBN1L SPDYE9P STYXL1 UPK3B UPK3BP1 YWHAG	AC007003.1, CCDC146, DTX2, DTX2P1-UPK3BP1-PMS2P11, FDPSP7, PION, POMZP3, PTPN12, RHBDD2, STYXL1, UPK3B, YWHAG	101930181, 113878, 22932, 441263, 51657, 57414, 57639, 5782, 619190, 7532, 80761		Translocation of SLC2A4 (GLUT4) to the plasma membrane:YWHAG | Signaling by NOTCH1:DTX2	uterine benign neoplasm:YWHAG | uterine fibroid:YWHAG | female reproductive organ benign neoplasm:YWHAG | reproductive organ benign neoplasm:YWHAG | meningioma:YWHAG	negative regulation of protein phosphorylation:YWHAG | platelet-derived growth factor receptor-beta signaling pathway:PTPN12 | platelet-derived growth factor receptor signaling pathway:PTPN12 | negative regulation of phosphorylation:YWHAG | negative regulation of protein kinase activity:YWHAG | negative regulation of protein serine/threonine kinase activity:YWHAG | positive regulation of cell pro…	Tissues; Epithelium:CCDC146,DTX2,RHBDD2,UPK3B	MIP_1A	7.80913	7.80913	0.0831611		C	T	0.0126641	0.0126641	369	0.833	0	FALSE	-0.000783409	1.06256	0.466993
rs141162627:442338:A:T	FALSE		8	8p23.3	a283	442338	rs141162627:442338:A:T	1	TRUE	TDRP (0 kb, 3'utr/3 prime UTR/MODIFIER | intron/Intron/MODIFIER | near_gene/Downstream gene/MODIFIER); FBXO25 (21 kb); FAM87A (110 kb); ERICH1 (120 kb)	TDRP:protein_coding(KNOWN); FBXO25:protein_coding(KNOWN); FAM87A:lincRNA(KNOWN); ERICH1:protein_coding(KNOWN)	TDRP: testis development related protein (0 kb)	0.124781	-0.158965	2.429	0.834948	0.38	0.62	0.81	7	7		NA	ERICH1		ERICH1 ERICH1-AS1 FAM87A FBXO25 TDRP ZNF596	ERICH1, FAM87A, FBXO25, TDRP	101927618, 157693, 157695, 157697, 26260						IL_12	6.52517	6.52517	0.0661938		T	A	0.0122997	0.0122997	384	0.891	0	FALSE	-0.188394	-1.50331	-2.23816
rs4921961:18638070:A:T	FALSE		8	8p22	a286	18638070	rs4921961:18638070:A:T	1	TRUE	PSD3 (0 kb, intron/NMD transcript/MODIFIER | intron/Intron/MODIFIER); RPL35P6 (5.6 kb)	PSD3:protein_coding(KNOWN); RPL35P6:pseudogene(KNOWN)	PSD3: pleckstrin and Sec7 domain containing 3 (0 kb)	-0.278786	-0.210455	0.781	0.391183	0.43	0.11	0.01	6	6	6:Motifs|PWM|HNF3|, Motifs|PWM|Cdx|, Motifs|PWM|HNF3beta|, Motifs|PWM|HNF3|, Motifs|PWM|FOXJ2|, Motifs|PWM|FOXP1|, Motifs|PWM|FOXO3A|, Motifs|PWM|Freac-7|, Motifs|PWM|FOXD3|, Motifs|PWM|HNF3|, Motifs|PWM|Cdx|, Motifs|PWM|HNF3alpha|, Motifs|PWM|Foxd3|, Motifs|PWM|Dbx1|, Motifs|PWM|Foxa2|, Motifs|PWM|Foxj3|, Motifs|PWM|Foxl1|, Motifs|PWM|FOXC1|, Motifs|PWM|FOXC1|, Motifs|PWM|FOXC2|, Motifs|PWM|ONEC…	NA	ASAH1		ASAH1 PSD3 RPL35P6	PSD3	23362						IL_1B	6.17188	6.17188	0.0662091		T	A	0.0253878	0.0253878	361	0.956	0	FALSE	-0.0119917	0.495254	0.478492
rs76631949:15317224:T:C	FALSE		8	8p22	a286	15317224	rs76631949:15317224:T:C	1	TRUE	TUSC3 (0 kb, intron/Intron/MODIFIER | nc-RNA/Non coding transcript/MODIFIER); SGCZ (220 kb)	TUSC3:protein_coding(KNOWN); SGCZ:protein_coding(KNOWN)	TUSC3: tumor suppressor candidate 3 (0 kb)	-0.588756	-0.250999	1.055	0.260727	0.13	0.05	0	7	7		NA		EXD3	EXD3 SGCZ TUSC3	SGCZ, TUSC3	137868, 7991				muscle cell cellular homeostasis:SGCZ | protein glycosylation:TUSC3 | macromolecule glycosylation:TUSC3 | glycosylation:TUSC3 | glycoprotein metabolic process:TUSC3 | glycoprotein biosynthetic process:TUSC3 | cardiac muscle tissue development:SGCZ		IL_1B	6.00113	6.00113	0.064244		C	T	0.0142271	0.0142271	361	0.976	0	FALSE	-0.275848	0.714794	0.064202
rs62505830:36121891:C:T	FALSE		8	8p12	a290	36121891	rs62505830:36121891:C:T	1	TRUE	RN7SKP201 (2.1 kb, near_gene/Upstream gene/MODIFIER); MTND6P19 (15 kb); RNU6-533P (45 kb)	RN7SKP201:misc_RNA(KNOWN); MTND6P19:pseudogene(KNOWN); RNU6-533P:snRNA(KNOWN)	RN7SKP201: RNA, 7SK small nuclear pseudogene 201 (2.1 kb)	-0.685177	-0.266399	0.509	0.453778	0.47	0.15	0.15	5	5		NA			MTND6P19 RN7SKP201 RNU6-533P								IL_1B	7.59319	7.59319	0.0824716		T	C	0.0108919	0.0108919	361	0.978	0	FALSE	0.182283	1.13584	1.05523
rs62505706:36338911:T:C	FALSE		8	8p12	a290	36338911	rs62505830:36121891:C:T	0.970587	FALSE	RPL23P10 (100 kb); RNU6-533P (170 kb); MTND6P19 (200 kb); RN7SKP201 (210 kb)	RPL23P10:pseudogene(KNOWN); RNU6-533P:snRNA(KNOWN); MTND6P19:pseudogene(KNOWN); RN7SKP201:misc_RNA(KNOWN)	RPL23P10: ribosomal protein L23 pseudogene 10 (100 kb)	-0.323799	-0.222052	3.037	0.446703	0.25	0.02	0.01	6	6		NA			MTND6P19 RN7SKP201 RNU6-533P RPL23P10								IL_1B	7.28291	7.28291	0.078936		C	T	0.0101246	0.0101246	361	0.986	0	FALSE	0.22237	1.27509	1.15334
rs987292:35877427:C:T	FALSE		8	8p12	a290	35877427	rs62505830:36121891:C:T	0.841418	FALSE	RP11-89M20.2 (0 kb, intron/Intron/MODIFIER | nc-RNA/Non coding transcript/MODIFIER); UNC5D (220 kb); RN7SKP201 (250 kb)	RP11-89M20.2:lincRNA(KNOWN); UNC5D:protein_coding(KNOWN); RN7SKP201:misc_RNA(KNOWN)	UNC5D: unc-5 homolog D (C. elegans) (220 kb)	-0.154553	-0.190838	3.05	0.432541	0.39	0.03	0.02	6	6	Motifs|PWM|Zfp410|, Motifs|Footprinting|SP1|Hpde6e6e7, Motifs|PWM|SP1|, Motifs|PWM|Sp1|	NA			RN7SKP201 RP11-89M20.2 UNC5D	UNC5D	137970				central nervous system neuron differentiation:UNC5D		IL_1B	6.01311	6.01311	0.0643822		T	C	0.0105401	0.0105401	361	0.959	0	FALSE	0.235525	1.10037	0.839713
rs191319042:41087084:G:A	FALSE		8	8p11.21	a291	41087084	rs191319042:41087084:G:A	1	TRUE	SFRP1 (32 kb); MIR548AO (41 kb); RPS29P2 (42 kb); RNU6-895P (69 kb)	SFRP1:protein_coding(KNOWN); MIR548AO:miRNA(KNOWN); RPS29P2:pseudogene(KNOWN); RNU6-895P:snRNA(KNOWN)	SFRP1: secreted frizzled-related protein 1 (32 kb)	-0.305537	-0.215758	3.063	0.57695	0.24	0.09	0.01	7	7		NA			MIR548AO RNU6-356P RNU6-895P RPS29P2 SFRP1	MIR548AO, SFRP1	100847068, 6422			esophageal disease:SFRP1 | non-small cell lung carcinoma:SFRP1	cellular response to vitamin D:SFRP1 | cellular response to vitamin:SFRP1 | response to vitamin D:SFRP1 | regulation of tissue remodeling:SFRP1 | cellular response to estrogen stimulus:SFRP1 | negative regulation of tissue remodeling:SFRP1 | cellular response to nutrient:SFRP1 | regulation of peptidyl-tyrosine phosphorylation:SFRP1 | cellular response to alcohol:SFRP1 | response to vitamin:SFRP1 …		IL_1B	6.39633	6.39633	0.0687881		A	G	0.0165013	0.0165013	361	0.997	0	FALSE	0.24198	0.920291	0.807453
rs118161772:41090429:T:C	FALSE		8	8p11.21	a291	41090429	rs191319042:41087084:G:A	0.999431	FALSE	SFRP1 (29 kb); MIR548AO (38 kb); RPS29P2 (39 kb); RNU6-895P (65 kb)	SFRP1:protein_coding(KNOWN); MIR548AO:miRNA(KNOWN); RPS29P2:pseudogene(KNOWN); RNU6-895P:snRNA(KNOWN)	SFRP1: secreted frizzled-related protein 1 (29 kb)	-0.0424151	-0.166248	1.719	0.325499	0.28	0.29	0.09	6	6		NA			MIR548AO RNU6-356P RNU6-895P RPS29P2 SFRP1	MIR548AO, SFRP1	100847068, 6422			esophageal disease:SFRP1 | non-small cell lung carcinoma:SFRP1	cellular response to vitamin D:SFRP1 | cellular response to vitamin:SFRP1 | response to vitamin D:SFRP1 | regulation of tissue remodeling:SFRP1 | cellular response to estrogen stimulus:SFRP1 | negative regulation of tissue remodeling:SFRP1 | cellular response to nutrient:SFRP1 | regulation of peptidyl-tyrosine phosphorylation:SFRP1 | cellular response to alcohol:SFRP1 | response to vitamin:SFRP1 …		IL_1B	6.33946	6.33946	0.0681342		C	T	0.01668	0.01668	361	0.989	0	FALSE	0.240289	0.901625	0.80322
rs112963652:87976837:G:A	FALSE		8	8q21.3	a301	87976837	rs112963652:87976837:G:A	1	TRUE	CNBD1 (0 kb, intron/Intron/MODIFIER); CNGB3 (220 kb)	CNBD1:protein_coding(KNOWN); CNGB3:protein_coding(KNOWN)	CNBD1: cyclic nucleotide binding domain containing 1 (0 kb)	-0.574164	-0.251643	0.605	0.283691	0.28	0.1	0.01	5	5		NA	CPNE3 | FAM82B | WWP1		CNBD1 CNGB3 CPNE3 FAM82B WWP1	CNBD1, CNGB3, CPNE3	168975, 54714, 8895	cAMP signaling pathway:CNGB3		prostate cancer:CPNE3 | male reproductive organ cancer:CPNE3 | macular degeneration:CNGB3	ERBB signaling pathway:CPNE3 | ERBB2 signaling pathway:CPNE3		IL_10	7.07455	7.07455	0.0715945		A	G	0.0136743	0.0136743	387	0.883	0	FALSE	0.150566	2.49014	1.88258
rs186777579:87967514:A:T	FALSE		8	8q21.3	a301	87967514	rs112963652:87976837:G:A	0.999738	FALSE	CNBD1 (0 kb, intron/Intron/MODIFIER); CNGB3 (210 kb)	CNBD1:protein_coding(KNOWN); CNGB3:protein_coding(KNOWN)	CNBD1: cyclic nucleotide binding domain containing 1 (0 kb)	-0.77148	-0.281298	0.019	0.186228	0.46	0.03	0.02	7	7		NA	CPNE3 | FAM82B | WWP1		CNBD1 CNGB3 CPNE3 FAM82B WWP1	CNBD1, CNGB3, CPNE3	168975, 54714, 8895	cAMP signaling pathway:CNGB3		prostate cancer:CPNE3 | male reproductive organ cancer:CPNE3 | macular degeneration:CNGB3	ERBB signaling pathway:CPNE3 | ERBB2 signaling pathway:CPNE3		IL_10	7.01528	7.01528	0.0709588		T	A	0.0135619	0.0135619	387	0.884	0	FALSE	0.1466	2.4813	1.88642
rs113843299:87933699:A:G	FALSE		8	8q21.3	a301	87933699	rs112963652:87976837:G:A	0.89314	FALSE	CNBD1 (0 kb, intron/Intron/MODIFIER | nc-RNA/Non coding transcript/MODIFIER); CNGB3 (180 kb)	CNBD1:protein_coding(KNOWN); CNGB3:protein_coding(KNOWN)	CNBD1: cyclic nucleotide binding domain containing 1 (0 kb)	-0.299336	-0.215658	1.331	0.754168	0.24	0.08	0.02	5	5		NA	CPNE3 | FAM82B | WWP1		CNBD1 CNGB3 CPNE3 FAM82B WWP1	CNBD1, CNGB3, CPNE3	168975, 54714, 8895	cAMP signaling pathway:CNGB3		prostate cancer:CPNE3 | male reproductive organ cancer:CPNE3 | macular degeneration:CNGB3	ERBB signaling pathway:CPNE3 | ERBB2 signaling pathway:CPNE3		IL_10	6.40053	6.40053	0.0643565		G	A	0.0140548	0.0140548	387	0.896	0	FALSE	0.146629	2.29	1.72525
rs200453303:128264747:TC:T	FALSE		8	8q24.21	a309	128264747	rs200453303:128264747:TC:T	1	TRUE	CCAT1 (33 kb); CASC8 (37 kb); CASC19 (49 kb); POU5F1B (160 kb)	CCAT1:lincRNA(KNOWN); CASC8:antisense(KNOWN); CASC19:lincRNA(KNOWN); POU5F1B:protein_coding(KNOWN)	CCAT1: colon cancer associated transcript 1 (non-protein coding) (33 kb)			0.685								NA			CASC19 CASC8 CCAT1 PCAT1 PCAT2 POU5F1B PRNCR1	CASC8, CCAT1, POU5F1B	100507056, 101930033, 5462, 727677						MIP_1A	6.75791	6.75791	0.0714081		T	TC	0.0119716	0.0119716	369	0.814	0	FALSE	0.0749389	0.900575	1.07709
rs140144380:141509706:T:C	FALSE		8	8q24.3	a312	141509706	rs140144380:141509706:T:C	1	TRUE	CHRAC1 (12 kb); CASC7 (21 kb); AGO2 (32 kb); TRAPPC9 (41 kb)	CHRAC1:protein_coding(KNOWN); CASC7:lincRNA(KNOWN); AGO2:protein_coding(KNOWN); TRAPPC9:protein_coding(KNOWN)	CHRAC1: chromatin accessibility complex 1 (12 kb)	-0.114828	-0.190376		0.939571	0.34	0.16	0.01	6	6	Motifs|Footprinting|PTF1-beta|Hpde6e6e7, Motifs|PWM|PTF1-beta|	NA	CHRAC1 | SLC45A4		AGO2 CASC7 CHRAC1 MIR151A PTK2 SLC45A4 TRAPPC9	AGO2, CHRAC1, PTK2, TRAPPC9	27161, 54108, 5747, 83696	Small cell lung cancer:PTK2 | Axon guidance:PTK2 | Transcriptional misregulation in cancer:PTK2 | Focal adhesion:PTK2 | ErbB signaling pathway:PTK2 | Endocrine resistance:PTK2 | Amoebiasis:PTK2 | Growth hormone synthesis, secretion and action:PTK2 | Chemokine signaling pathway:PTK2 | Proteoglycans in cancer:PTK2	MET activates PTK2 signaling:PTK2 | RHO GTPases Activate WASPs and WAVEs:PTK2 | MET promotes cell motility:PTK2 | Netrin-1 signaling:PTK2 | RHO GTPase Effectors:PTK2 | Regulation of actin dynamics for phagocytic cup formation:PTK2 | Signaling by MET:PTK2 | Transcriptional regulation by RUNX1:AGO2 | Fcgamma receptor (FCGR) dependent phagocytosis:PTK2 | Signaling by Rho GTPases:PTK2	prostate cancer:PTK2 | male reproductive organ cancer:PTK2 | myeloma:AGO2 | bone marrow cancer:AGO2	substrate adhesion-dependent cell spreading:PTK2 | regulation of substrate adhesion-dependent cell spreading:PTK2 | central nervous system neuron development:PTK2 | integrin-mediated signaling pathway:PTK2 | central nervous system neuron axonogenesis:PTK2 | peptidyl-tyrosine autophosphorylation:PTK2 | ERBB signaling pathway:PTK2 | regulation of cell morphogenesis involved in differentiation:PTK2 …		IL_10	6.03033	6.03033	0.0603679		C	T	0.053474	0.053474	387	0.979	0	FALSE	-0.00869103	1.11106	0.550024
rs35684378:141514652:G:T	FALSE		8	8q24.3	a312	141514652	rs140144380:141509706:T:C	0.999989	FALSE	CTA-204B4.2 (1.3 kb, near_gene/Downstream gene/MODIFIER); CHRAC1 (6.7 kb); CASC7 (16 kb); AGO2 (27 kb); TRAPPC9 (46 kb)	CTA-204B4.2:antisense(KNOWN); CHRAC1:protein_coding(KNOWN); CASC7:lincRNA(KNOWN); AGO2:protein_coding(KNOWN); TRAPPC9:protein_coding(KNOWN)	CHRAC1: chromatin accessibility complex 1 (6.7 kb)	-0.441122	-0.219035	0.105	0.507226	0.32	0.16	0.02	6	6	Motifs|PWM|HMGA2|, Motifs|Footprinting|HMGA2|Fibrop, Motifs|Footprinting|HMGA2|Hepatocytes	NA	CHRAC1 | SLC45A4		AGO2 CASC7 CHRAC1 CTA-204B4.2 MIR151A PTK2 SLC45A4 TRAPPC9	AGO2, CHRAC1, PTK2, TRAPPC9	27161, 54108, 5747, 83696	Small cell lung cancer:PTK2 | Axon guidance:PTK2 | Transcriptional misregulation in cancer:PTK2 | Focal adhesion:PTK2 | ErbB signaling pathway:PTK2 | Endocrine resistance:PTK2 | Amoebiasis:PTK2 | Growth hormone synthesis, secretion and action:PTK2 | Chemokine signaling pathway:PTK2 | Proteoglycans in cancer:PTK2	MET activates PTK2 signaling:PTK2 | RHO GTPases Activate WASPs and WAVEs:PTK2 | MET promotes cell motility:PTK2 | Netrin-1 signaling:PTK2 | RHO GTPase Effectors:PTK2 | Regulation of actin dynamics for phagocytic cup formation:PTK2 | Signaling by MET:PTK2 | Transcriptional regulation by RUNX1:AGO2 | Fcgamma receptor (FCGR) dependent phagocytosis:PTK2 | Signaling by Rho GTPases:PTK2	prostate cancer:PTK2 | male reproductive organ cancer:PTK2 | myeloma:AGO2 | bone marrow cancer:AGO2	substrate adhesion-dependent cell spreading:PTK2 | regulation of substrate adhesion-dependent cell spreading:PTK2 | central nervous system neuron development:PTK2 | integrin-mediated signaling pathway:PTK2 | central nervous system neuron axonogenesis:PTK2 | peptidyl-tyrosine autophosphorylation:PTK2 | ERBB signaling pathway:PTK2 | regulation of cell morphogenesis involved in differentiation:PTK2 …		IL_10	6.02831	6.02831	0.0603468		T	G	0.053483	0.053483	387	0.981	0	FALSE	-0.00829965	1.11047	0.549616
rs67881793:141515380:CATGGAAACCCAGACAAAACGCCGAAGTTCCCTCCTTCTCCAAG:C	FALSE		8	8q24.3	a312	141515380	rs140144380:141509706:T:C	0.999973	FALSE	CTA-204B4.2 (0.53 kb, near_gene/Downstream gene/MODIFIER); CHRAC1 (6 kb); CASC7 (15 kb); AGO2 (26 kb); TRAPPC9 (47 kb)	CTA-204B4.2:antisense(KNOWN); CHRAC1:protein_coding(KNOWN); CASC7:lincRNA(KNOWN); AGO2:protein_coding(KNOWN); TRAPPC9:protein_coding(KNOWN)	CHRAC1: chromatin accessibility complex 1 (6 kb)											NA	CHRAC1 | SLC45A4		AGO2 CASC7 CHRAC1 CTA-204B4.2 MIR151A PTK2 SLC45A4 TRAPPC9	AGO2, CHRAC1, PTK2, TRAPPC9	27161, 54108, 5747, 83696	Small cell lung cancer:PTK2 | Axon guidance:PTK2 | Transcriptional misregulation in cancer:PTK2 | Focal adhesion:PTK2 | ErbB signaling pathway:PTK2 | Endocrine resistance:PTK2 | Amoebiasis:PTK2 | Growth hormone synthesis, secretion and action:PTK2 | Chemokine signaling pathway:PTK2 | Proteoglycans in cancer:PTK2	MET activates PTK2 signaling:PTK2 | RHO GTPases Activate WASPs and WAVEs:PTK2 | MET promotes cell motility:PTK2 | Netrin-1 signaling:PTK2 | RHO GTPase Effectors:PTK2 | Regulation of actin dynamics for phagocytic cup formation:PTK2 | Signaling by MET:PTK2 | Transcriptional regulation by RUNX1:AGO2 | Fcgamma receptor (FCGR) dependent phagocytosis:PTK2 | Signaling by Rho GTPases:PTK2	prostate cancer:PTK2 | male reproductive organ cancer:PTK2 | myeloma:AGO2 | bone marrow cancer:AGO2	substrate adhesion-dependent cell spreading:PTK2 | regulation of substrate adhesion-dependent cell spreading:PTK2 | central nervous system neuron development:PTK2 | integrin-mediated signaling pathway:PTK2 | central nervous system neuron axonogenesis:PTK2 | peptidyl-tyrosine autophosphorylation:PTK2 | ERBB signaling pathway:PTK2 | regulation of cell morphogenesis involved in differentiation:PTK2 …		IL_10	6.02818	6.02818	0.0603454		C	CATGGAAACCCAGACAAAACGCCGAAGTTCCCTCCTTCTCCAAG	0.0534263	0.0534263	387	0.981	0	FALSE	-0.00793845	1.11087	0.549851
rs13282837:141515671:C:G	FALSE		8	8q24.3	a312	141515671	rs140144380:141509706:T:C	0.99996	FALSE	CTA-204B4.2 (0.24 kb, near_gene/Downstream gene/MODIFIER); CHRAC1 (5.7 kb); CASC7 (15 kb); AGO2 (26 kb); TRAPPC9 (47 kb)	CTA-204B4.2:antisense(KNOWN); CHRAC1:protein_coding(KNOWN); CASC7:lincRNA(KNOWN); AGO2:protein_coding(KNOWN); TRAPPC9:protein_coding(KNOWN)	CHRAC1: chromatin accessibility complex 1 (5.7 kb)	-0.217308	-0.188877	1.813	0.577329	0.32	0.29	0.16	5	5	Chromatin_Structure|DNase-seq|Medullod341|, Chromatin_Structure|DNase-seq|Medullo|, Chromatin_Structure|DNase-seq|H1hesc|, Chromatin_Structure|DNase-seq|Huvec|, Chromatin_Structure|DNase-seq|Gcbcell|	NA	CHRAC1 | SLC45A4		AGO2 CASC7 CHRAC1 CTA-204B4.2 MIR151A PTK2 SLC45A4 TRAPPC9	AGO2, CHRAC1, PTK2, TRAPPC9	27161, 54108, 5747, 83696	Small cell lung cancer:PTK2 | Axon guidance:PTK2 | Transcriptional misregulation in cancer:PTK2 | Focal adhesion:PTK2 | ErbB signaling pathway:PTK2 | Endocrine resistance:PTK2 | Amoebiasis:PTK2 | Growth hormone synthesis, secretion and action:PTK2 | Chemokine signaling pathway:PTK2 | Proteoglycans in cancer:PTK2	MET activates PTK2 signaling:PTK2 | RHO GTPases Activate WASPs and WAVEs:PTK2 | MET promotes cell motility:PTK2 | Netrin-1 signaling:PTK2 | RHO GTPase Effectors:PTK2 | Regulation of actin dynamics for phagocytic cup formation:PTK2 | Signaling by MET:PTK2 | Transcriptional regulation by RUNX1:AGO2 | Fcgamma receptor (FCGR) dependent phagocytosis:PTK2 | Signaling by Rho GTPases:PTK2	prostate cancer:PTK2 | male reproductive organ cancer:PTK2 | myeloma:AGO2 | bone marrow cancer:AGO2	substrate adhesion-dependent cell spreading:PTK2 | regulation of substrate adhesion-dependent cell spreading:PTK2 | central nervous system neuron development:PTK2 | integrin-mediated signaling pathway:PTK2 | central nervous system neuron axonogenesis:PTK2 | peptidyl-tyrosine autophosphorylation:PTK2 | ERBB signaling pathway:PTK2 | regulation of cell morphogenesis involved in differentiation:PTK2 …		IL_10	6.02642	6.02642	0.0603261		G	C	0.0534121	0.0534121	387	0.981	0	FALSE	-0.00771268	1.11084	0.549877
rs35227089:141516762:CAA:C	TRUE		8	8q24.3	a312	141516762	rs140144380:141509706:T:C	0.999884	FALSE	CHRAC1 (4.6 kb); CASC7 (13 kb); AGO2 (25 kb); TRAPPC9 (48 kb)	CHRAC1:protein_coding(KNOWN); CASC7:lincRNA(KNOWN); AGO2:protein_coding(KNOWN); TRAPPC9:protein_coding(KNOWN)	CHRAC1: chromatin accessibility complex 1 (4.6 kb)											NA	CHRAC1 | SLC45A4		AGO2 CASC7 CHRAC1 MIR151A PTK2 SLC45A4 TRAPPC9	AGO2, CHRAC1, PTK2, TRAPPC9	27161, 54108, 5747, 83696	Small cell lung cancer:PTK2 | Axon guidance:PTK2 | Transcriptional misregulation in cancer:PTK2 | Focal adhesion:PTK2 | ErbB signaling pathway:PTK2 | Endocrine resistance:PTK2 | Amoebiasis:PTK2 | Growth hormone synthesis, secretion and action:PTK2 | Chemokine signaling pathway:PTK2 | Proteoglycans in cancer:PTK2	MET activates PTK2 signaling:PTK2 | RHO GTPases Activate WASPs and WAVEs:PTK2 | MET promotes cell motility:PTK2 | Netrin-1 signaling:PTK2 | RHO GTPase Effectors:PTK2 | Regulation of actin dynamics for phagocytic cup formation:PTK2 | Signaling by MET:PTK2 | Transcriptional regulation by RUNX1:AGO2 | Fcgamma receptor (FCGR) dependent phagocytosis:PTK2 | Signaling by Rho GTPases:PTK2	prostate cancer:PTK2 | male reproductive organ cancer:PTK2 | myeloma:AGO2 | bone marrow cancer:AGO2	substrate adhesion-dependent cell spreading:PTK2 | regulation of substrate adhesion-dependent cell spreading:PTK2 | central nervous system neuron development:PTK2 | integrin-mediated signaling pathway:PTK2 | central nervous system neuron axonogenesis:PTK2 | peptidyl-tyrosine autophosphorylation:PTK2 | ERBB signaling pathway:PTK2 | regulation of cell morphogenesis involved in differentiation:PTK2 …		IL_10	6.02221	6.02221	0.0602809		C	CAA	0.0533579	0.0533579	387	0.98	0	FALSE	-0.00704148	1.1111	0.549884
rs79732315:2785656:C:T	FALSE		9	9p24.2	a313	2785656	rs79732315:2785656:C:T	1	TRUE	KIAA0020 (0 kb, intron/NMD transcript/MODIFIER | intron/Intron/MODIFIER); KCNV2 (56 kb); CARM1P1 (120 kb); VLDLR (130 kb)	KIAA0020:protein_coding(KNOWN); KCNV2:protein_coding(KNOWN); CARM1P1:pseudogene(KNOWN); VLDLR:protein_coding(KNOWN)	KIAA0020: KIAA0020 (0 kb)	-0.406305	-0.121848	0.445	0.379245	0.38	0.22	0.12	4	4	Chromatin_Structure|DNase-seq|H7es|, Chromatin_Structure|DNase-seq|H7es|Diffa14d, Chromatin_Structure|DNase-seq|Hvmf|, Chromatin_Structure|DNase-seq|Werirb1|, Protein_Binding|ChIP-seq|ESR1|ECC-1|estradiol_10nm, Protein_Binding|ChIP-seq|ESR1|ECC-1|genistein_100nm	NA			CARM1P1 KCNV2 KIAA0020 VLDLR	KCNV2, KIAA0020, RP11-125B21.2, VLDLR	101930048, 169522, 7436, 9933				positive regulation of cell projection organization:VLDLR | positive regulation of neuron projection development:VLDLR | cognition:VLDLR | regulation of dendrite development:VLDLR | positive regulation of neuron differentiation:VLDLR | positive regulation of dendrite development:VLDLR | dendrite development:VLDLR | learning or memory:VLDLR | positive regulation of neurogenesis:VLDLR | regulation …		MIP_1A	6.5409	6.5409	0.0689711		T	C	0.0192117	0.0192117	369	0.92	0	FALSE	0.168632	1.11781	1.00841
rs72692817:9000961:C:T	FALSE		9	9p23	a314	9000961	rs72692817:9000961:C:T	1	TRUE	PTPRD (0 kb, intron/Intron/MODIFIER); RPS26P3 (90 kb); RNU7-185P (200 kb)	PTPRD:protein_coding(KNOWN); RPS26P3:pseudogene(KNOWN); RNU7-185P:snRNA(KNOWN)	PTPRD: protein tyrosine phosphatase, receptor type, D (0 kb)	0.10329	-0.154225	3.575	0.765263	0.29	0.19	0.05	7	7		NA			PTPRD RNU7-185P RPS26P3	PTPRD	5789				regulation of postsynaptic density organization:PTPRD | positive regulation of cell projection organization:PTPRD | postsynaptic density organization:PTPRD | postsynaptic specialization organization:PTPRD | positive regulation of neuron projection development:PTPRD | regulation of dendrite development:PTPRD | regulation of organelle assembly:PTPRD | positive regulation of neuron differentiation:P…		MIP_1A	6.5721	6.5721	0.069322		T	C	0.0121735	0.0121735	369	0.953	0	FALSE	0.152657	1.79931	1.26284
rs78661355:7390484:G:A	FALSE		9	9p24.1	a314	7390484	rs78661355:7390484:G:A	1	TRUE	RPL4P5 (87 kb); KDM4C (210 kb)	RPL4P5:pseudogene(KNOWN); KDM4C:protein_coding(KNOWN)	RPL4P5: ribosomal protein L4 pseudogene 5 (87 kb)	-0.167118	-0.191632	0.702	0.289883	0.32	0.31	0.11	7	7		NA			KDM4C RPL4P5	KDM4C	23081		RHO GTPase Effectors:KDM4C | Signaling by Rho GTPases:KDM4C | RHO GTPases activate PKNs:KDM4C | Chromatin modifying enzymes:KDM4C | Chromatin organization:KDM4C		regulation of histone H3-K9 methylation:KDM4C | histone H3-K9 methylation:KDM4C | histone H3-K9 modification:KDM4C | chromatin remodeling:KDM4C | regulation of histone methylation:KDM4C | histone lysine methylation:KDM4C | regulation of stem cell differentiation:KDM4C | macromolecule methylation:KDM4C | peptidyl-lysine methylation:KDM4C | histone methylation:KDM4C | regulation of histone modifica…		IL_10	6.20121	6.20121	0.0622102		A	G	0.0121768	0.0121768	387	0.912	0	FALSE	0.24418	2.3329	1.64873
rs188034471:85937714:G:A	FALSE		9	9q21.32	a330	85937714	rs188034471:85937714:G:A	1	TRUE	FRMD3 (0 kb, intron/Intron/MODIFIER); RNU4-29P (47 kb); RN7SKP242 (120 kb)	FRMD3:protein_coding(KNOWN); RNU4-29P:snRNA(KNOWN); RN7SKP242:misc_RNA(KNOWN)	FRMD3: FERM domain containing 3 (0 kb)	-0.518562	-0.22998	2.781	0.629739	0.29	0.11	0.03	5	5		NA	KIF27 | UBQLN1		FRMD3 KIF27 RN7SKP242 RNU4-29P UBQLN1	FRMD3, KIF27	257019, 55582				cilium movement:KIF27		IL_1B	6.50626	6.50626	0.0700497		A	G	0.0122589	0.0122589	361	0.864	0	FALSE	0.170145	0.872244	0.740688
rs68119594:107104559:T:TA	TRUE		9	9q31.1	a335	107104559	rs68119594:107104559:T:TA	1	TRUE	OR13F1 (160 kb); OR13C4 (180 kb); OR13C3 (190 kb); SMC2 (200 kb)	OR13F1:protein_coding(KNOWN); OR13C4:protein_coding(KNOWN); OR13C3:protein_coding(KNOWN); SMC2:protein_coding(KNOWN)	OR13F1: olfactory receptor, family 13, subfamily F, member 1 (160 kb)					0.4	0.2	0.09	6	6	6:Motifs|PWM|Srf|, Motifs|PWM|Srf|, Motifs|PWM|Srf|, Motifs|PWM|Elf3|, Motifs|PWM|Elf3|, Motifs|PWM|Elf3|, Motifs|PWM|Elf3|, Motifs|PWM|Elf3|, Motifs|PWM|Srf|, Motifs|PWM|Srf|, Motifs|PWM|Srf|, Motifs|PWM|Srf|, Motifs|PWM|Tcfap2e|, Motifs|PWM|Zfp105|, Motifs|PWM|Zfp105|, Motifs|PWM|Zfp105|, Motifs|PWM|Zfp105|;6:NA	NA	- | LOC286367 | NIPSNAP3A		- LOC286367 NIPSP3A OR13C3 OR13C4 OR13C8 OR13D2P OR13F1 SMC2	LOC286367, NIPSNAP3A, OR13C3, OR13C4, OR13F1, SMC2	10592, 138803, 138804, 138805, 25934	Olfactory transduction:OR13C3,OR13C4,OR13F1	Olfactory Signaling Pathway:OR13C3,OR13C4,OR13F1		regulation of response to drug:OR13F1 | detection of chemical stimulus involved in sensory perception of smell:OR13C3,OR13C4,OR13F1 | sensory perception of smell:OR13C3,OR13C4,OR13F1 | adenylate cyclase-activating G protein-coupled receptor signaling pathway:OR13F1 | adult behavior:OR13F1 | detection of chemical stimulus involved in sensory perception:OR13C3,OR13C4,OR13F1 | second-messenger-media…		IL_8	6.22795	6.22795	0.063291		TA	T	0.0407761	0.0407761	382	0.993	0	FALSE	0.202728	0.668531	0.0626311
rs36002018:133656053:A:T	FALSE		9	9q34.12	a340	133656053	rs36002018:133656053:A:T	1	TRUE	ABL1 (0 kb, intron/Intron/MODIFIER); EXOSC2 (76 kb); PRDM12 (98 kb); QRFP (110 kb)	ABL1:protein_coding(KNOWN); EXOSC2:protein_coding(KNOWN); PRDM12:protein_coding(KNOWN); QRFP:protein_coding(KNOWN)	ABL1: c-abl oncogene 1, non-receptor tyrosine kinase (0 kb)	-0.0833435	0.166759	0.044	0.445143	0.34	0.3	0.32	5	5		NA	EXOSC2 | FNBP1 | FUBP3	ARC | NPAS4 | SLC47A2 | ZMYND10	ABL1 ARC EXOSC2 FIBCD1 FNBP1 FUBP3 LAMC3 NPAS4 PRDM12 QRFP SLC47A2 ZMYND10	ABL1, EXOSC2, PRDM12, QRFP	23404, 25, 347148, 59335	Axon guidance:ABL1 | ErbB signaling pathway:ABL1 | Viral myocarditis:ABL1 | Ras signaling pathway:ABL1	HDR through Single Strand Annealing (SSA):ABL1 | RHO GTPases Activate WASPs and WAVEs:ABL1 | RHO GTPase Effectors:ABL1 | Regulation of actin dynamics for phagocytic cup formation:ABL1 | HDR through Homologous Recombination (HRR) or Single Strand Annealing (SSA):ABL1 | Homology Directed Repair:ABL1 | DNA Double-Strand Break Repair:ABL1 | Transcriptional regulation by RUNX1:ABL1 | Fcgamma receptor …	thrombocytosis:ABL1 | polycythemia:ABL1 | bone marrow disease:ABL1 | hemorrhagic disease:ABL1 | myeloma:ABL1 | blood coagulation disease:ABL1 | lymphoid leukemia:ABL1 | bone marrow cancer:ABL1	substrate adhesion-dependent cell spreading:ABL1 | regulation of substrate adhesion-dependent cell spreading:ABL1 | positive regulation of substrate adhesion-dependent cell spreading:ABL1 | positive regulation of cell-matrix adhesion:ABL1 | negative regulation of protein phosphorylation:ABL1 | regulation of cell-matrix adhesion:ABL1 | positive regulation of cell-substrate adhesion:ABL1 | regulati…		IL_10	7.3448	7.3448	0.0744875		T	A	0.0247249	0.0247249	387	0.902	0	FALSE	0.150367	1.74953	1.39964
rs12006244:133743416:G:A	FALSE		9	9q34.12	a340	133743416	rs12006244:133743416:G:A	1	TRUE	ABL1 (0 kb, intron/Intron/MODIFIER); QRFP (25 kb); FIBCD1 (34 kb); LAMC3 (140 kb)	ABL1:protein_coding(KNOWN); QRFP:protein_coding(KNOWN); FIBCD1:protein_coding(KNOWN); LAMC3:protein_coding(KNOWN)	ABL1: c-abl oncogene 1, non-receptor tyrosine kinase (0 kb)	-0.653746	-0.248648	0.178	0.446539	0.29	0.14	0.05	7	7		NA	EXOSC2 | FIBCD1 | FNBP1 | FUBP3 | LOC401554	ARC | NPAS4 | PRAME | SLC47A2 | ZMYND10	ABL1 AIF1L ARC EXOSC2 FIBCD1 FNBP1 FUBP3 LAMC3 LOC401554 NPAS4 PRAME PRDM12 QRFP SLC47A2 ZMYND10	ABL1, EXOSC2, FIBCD1, LAMC3, QRFP	10319, 23404, 25, 347148, 84929	Small cell lung cancer:LAMC3 | Axon guidance:ABL1 | Focal adhesion:LAMC3 | ErbB signaling pathway:ABL1 | Amoebiasis:LAMC3 | Viral myocarditis:ABL1 | Ras signaling pathway:ABL1	HDR through Single Strand Annealing (SSA):ABL1 | MET promotes cell motility:LAMC3 | MET activates PTK2 signaling:LAMC3 | RHO GTPases Activate WASPs and WAVEs:ABL1 | Signaling by MET:LAMC3 | RHO GTPase Effectors:ABL1 | Regulation of actin dynamics for phagocytic cup formation:ABL1 | HDR through Homologous Recombination (HRR) or Single Strand Annealing (SSA):ABL1 | Homology Directed Repair:ABL1 | D…	thrombocytosis:ABL1 | polycythemia:ABL1 | bone marrow disease:ABL1 | hemorrhagic disease:ABL1 | myeloma:ABL1 | blood coagulation disease:ABL1 | lymphoid leukemia:ABL1 | bone marrow cancer:ABL1	substrate adhesion-dependent cell spreading:ABL1,LAMC3 | regulation of substrate adhesion-dependent cell spreading:ABL1 | positive regulation of substrate adhesion-dependent cell spreading:ABL1 | positive regulation of cell-matrix adhesion:ABL1 | negative regulation of protein phosphorylation:ABL1 | regulation of cell-matrix adhesion:ABL1 | positive regulation of cell-substrate adhesion:ABL1 | re…		IL_10	6.8712	6.8712	0.0694142		A	G	0.0229211	0.0229211	387	0.994	0	FALSE	0.271294	1.69266	1.44324
rs11999959:133743469:C:T	FALSE		9	9q34.12	a340	133743469	rs12006244:133743416:G:A	0.999996	FALSE	ABL1 (0 kb, intron/Intron/MODIFIER); QRFP (25 kb); FIBCD1 (34 kb); LAMC3 (140 kb)	ABL1:protein_coding(KNOWN); QRFP:protein_coding(KNOWN); FIBCD1:protein_coding(KNOWN); LAMC3:protein_coding(KNOWN)	ABL1: c-abl oncogene 1, non-receptor tyrosine kinase (0 kb)	-0.370433	-0.212235	3.272	0.644814	0.34	0.17	0.04	6	6		NA	EXOSC2 | FNBP1 | FUBP3	ARC | NPAS4 | PRAME | SLC47A2 | ZMYND10	ABL1 AIF1L ARC EXOSC2 FIBCD1 FNBP1 FUBP3 LAMC3 NPAS4 PRAME PRDM12 QRFP SLC47A2 ZMYND10	ABL1, EXOSC2, FIBCD1, LAMC3, QRFP	10319, 23404, 25, 347148, 84929	Small cell lung cancer:LAMC3 | Axon guidance:ABL1 | Focal adhesion:LAMC3 | ErbB signaling pathway:ABL1 | Amoebiasis:LAMC3 | Viral myocarditis:ABL1 | Ras signaling pathway:ABL1	HDR through Single Strand Annealing (SSA):ABL1 | MET promotes cell motility:LAMC3 | MET activates PTK2 signaling:LAMC3 | RHO GTPases Activate WASPs and WAVEs:ABL1 | Signaling by MET:LAMC3 | RHO GTPase Effectors:ABL1 | Regulation of actin dynamics for phagocytic cup formation:ABL1 | HDR through Homologous Recombination (HRR) or Single Strand Annealing (SSA):ABL1 | Homology Directed Repair:ABL1 | D…	thrombocytosis:ABL1 | polycythemia:ABL1 | bone marrow disease:ABL1 | hemorrhagic disease:ABL1 | myeloma:ABL1 | blood coagulation disease:ABL1 | lymphoid leukemia:ABL1 | bone marrow cancer:ABL1	substrate adhesion-dependent cell spreading:ABL1,LAMC3 | regulation of substrate adhesion-dependent cell spreading:ABL1 | positive regulation of substrate adhesion-dependent cell spreading:ABL1 | positive regulation of cell-matrix adhesion:ABL1 | negative regulation of protein phosphorylation:ABL1 | regulation of cell-matrix adhesion:ABL1 | positive regulation of cell-substrate adhesion:ABL1 | re…		IL_10	6.86799	6.86799	0.0693795		T	C	0.0229316	0.0229316	387	0.995	0	FALSE	0.27133	1.69155	1.44249
rs35550243:133737519:A:G	FALSE		9	9q34.12	a340	133737519	rs12006244:133743416:G:A	0.999927	FALSE	ABL1 (0 kb, intron/Intron/MODIFIER); QRFP (31 kb); FIBCD1 (40 kb); LAMC3 (150 kb)	ABL1:protein_coding(KNOWN); QRFP:protein_coding(KNOWN); FIBCD1:protein_coding(KNOWN); LAMC3:protein_coding(KNOWN)	ABL1: c-abl oncogene 1, non-receptor tyrosine kinase (0 kb)	-0.0456306	0.0882937	2.249	0.551839	0.46	0.16	0.2	5	5	Motifs|Footprinting|Lhx3|K562, Motifs|PWM|Lhx3|, Motifs|PWM|Dbx1|, Motifs|PWM|Sox21|, Motifs|PWM|Sox21|, Motifs|PWM|Dbx1|, Motifs|PWM|Tlx2|, Motifs|PWM|Bbx|, Motifs|PWM|Bbx|, Protein_Binding|ChIP-seq|POLR2A|IMR90|, Protein_Binding|ChIP-seq|POLR2A|IMR90|	NA	EXOSC2 | FNBP1 | FUBP3	ARC | NPAS4 | PRAME | SLC47A2 | ZMYND10	ABL1 AIF1L ARC EXOSC2 FIBCD1 FNBP1 FUBP3 LAMC3 NPAS4 PRAME PRDM12 QRFP SLC47A2 ZMYND10	ABL1, EXOSC2, FIBCD1, LAMC3, QRFP	10319, 23404, 25, 347148, 84929	Small cell lung cancer:LAMC3 | Axon guidance:ABL1 | Focal adhesion:LAMC3 | ErbB signaling pathway:ABL1 | Amoebiasis:LAMC3 | Viral myocarditis:ABL1 | Ras signaling pathway:ABL1	HDR through Single Strand Annealing (SSA):ABL1 | MET promotes cell motility:LAMC3 | MET activates PTK2 signaling:LAMC3 | RHO GTPases Activate WASPs and WAVEs:ABL1 | Signaling by MET:LAMC3 | RHO GTPase Effectors:ABL1 | Regulation of actin dynamics for phagocytic cup formation:ABL1 | HDR through Homologous Recombination (HRR) or Single Strand Annealing (SSA):ABL1 | Homology Directed Repair:ABL1 | D…	thrombocytosis:ABL1 | polycythemia:ABL1 | bone marrow disease:ABL1 | hemorrhagic disease:ABL1 | myeloma:ABL1 | blood coagulation disease:ABL1 | lymphoid leukemia:ABL1 | bone marrow cancer:ABL1	substrate adhesion-dependent cell spreading:ABL1,LAMC3 | regulation of substrate adhesion-dependent cell spreading:ABL1 | positive regulation of substrate adhesion-dependent cell spreading:ABL1 | positive regulation of cell-matrix adhesion:ABL1 | negative regulation of protein phosphorylation:ABL1 | regulation of cell-matrix adhesion:ABL1 | positive regulation of cell-substrate adhesion:ABL1 | re…		IL_10	6.86721	6.86721	0.0693713		G	A	0.0228889	0.0228889	387	0.997	0	FALSE	0.272423	1.69343	1.44338
rs73656060:133742552:T:C	FALSE		9	9q34.12	a340	133742552	rs12006244:133743416:G:A	0.999996	FALSE	ABL1 (0 kb, intron/Intron/MODIFIER); QRFP (26 kb); FIBCD1 (35 kb); LAMC3 (140 kb)	ABL1:protein_coding(KNOWN); QRFP:protein_coding(KNOWN); FIBCD1:protein_coding(KNOWN); LAMC3:protein_coding(KNOWN)	ABL1: c-abl oncogene 1, non-receptor tyrosine kinase (0 kb)	-0.0564677	-0.138195	3.358	0.368042	0.48	0.15	0.09	5	5	Motifs|PWM|c-Ets-2|, Motifs|PWM|Elf3|, Chromatin_Structure|DNase-seq|K562|, Chromatin_Structure|DNase-seq|K562|Znf4c50c4, Chromatin_Structure|DNase-seq|K562|Znfe103c6	NA	EXOSC2 | FIBCD1 | FNBP1 | FUBP3 | LOC401554	ARC | NPAS4 | PRAME | SLC47A2 | ZMYND10	ABL1 AIF1L ARC EXOSC2 FIBCD1 FNBP1 FUBP3 LAMC3 LOC401554 NPAS4 PRAME PRDM12 QRFP SLC47A2 ZMYND10	ABL1, EXOSC2, FIBCD1, LAMC3, QRFP	10319, 23404, 25, 347148, 84929	Small cell lung cancer:LAMC3 | Axon guidance:ABL1 | Focal adhesion:LAMC3 | ErbB signaling pathway:ABL1 | Amoebiasis:LAMC3 | Viral myocarditis:ABL1 | Ras signaling pathway:ABL1	HDR through Single Strand Annealing (SSA):ABL1 | MET promotes cell motility:LAMC3 | MET activates PTK2 signaling:LAMC3 | RHO GTPases Activate WASPs and WAVEs:ABL1 | Signaling by MET:LAMC3 | RHO GTPase Effectors:ABL1 | Regulation of actin dynamics for phagocytic cup formation:ABL1 | HDR through Homologous Recombination (HRR) or Single Strand Annealing (SSA):ABL1 | Homology Directed Repair:ABL1 | D…	thrombocytosis:ABL1 | polycythemia:ABL1 | bone marrow disease:ABL1 | hemorrhagic disease:ABL1 | myeloma:ABL1 | blood coagulation disease:ABL1 | lymphoid leukemia:ABL1 | bone marrow cancer:ABL1	substrate adhesion-dependent cell spreading:ABL1,LAMC3 | regulation of substrate adhesion-dependent cell spreading:ABL1 | positive regulation of substrate adhesion-dependent cell spreading:ABL1 | positive regulation of cell-matrix adhesion:ABL1 | negative regulation of protein phosphorylation:ABL1 | regulation of cell-matrix adhesion:ABL1 | positive regulation of cell-substrate adhesion:ABL1 | re…		IL_10	6.86711	6.86711	0.0693699		C	T	0.0229328	0.0229328	387	0.99	0	FALSE	0.271314	1.69135	1.44234
rs73656061:133743035:T:C	FALSE		9	9q34.12	a340	133743035	rs12006244:133743416:G:A	0.999996	FALSE	ABL1 (0 kb, intron/Intron/MODIFIER); QRFP (26 kb); FIBCD1 (35 kb); LAMC3 (140 kb)	ABL1:protein_coding(KNOWN); QRFP:protein_coding(KNOWN); FIBCD1:protein_coding(KNOWN); LAMC3:protein_coding(KNOWN)	ABL1: c-abl oncogene 1, non-receptor tyrosine kinase (0 kb)	0.00823519	-0.13769	3.632	0.679497	0.61	0.19	0.17	5	5	Motifs|Footprinting|Ets|K562, Motifs|PWM|Ets|, Motifs|Footprinting|RREB-1|K562, Motifs|PWM|RREB-1|, Chromatin_Structure|DNase-seq|K562|Znfa41c6, Chromatin_Structure|DNase-seq|K562|	NA	EXOSC2 | FIBCD1 | FNBP1 | FUBP3 | LOC401554	ARC | NPAS4 | PRAME | SLC47A2 | ZMYND10	ABL1 AIF1L ARC EXOSC2 FIBCD1 FNBP1 FUBP3 LAMC3 LOC401554 NPAS4 PRAME PRDM12 QRFP SLC47A2 ZMYND10	ABL1, EXOSC2, FIBCD1, LAMC3, QRFP	10319, 23404, 25, 347148, 84929	Small cell lung cancer:LAMC3 | Axon guidance:ABL1 | Focal adhesion:LAMC3 | ErbB signaling pathway:ABL1 | Amoebiasis:LAMC3 | Viral myocarditis:ABL1 | Ras signaling pathway:ABL1	HDR through Single Strand Annealing (SSA):ABL1 | MET promotes cell motility:LAMC3 | MET activates PTK2 signaling:LAMC3 | RHO GTPases Activate WASPs and WAVEs:ABL1 | Signaling by MET:LAMC3 | RHO GTPase Effectors:ABL1 | Regulation of actin dynamics for phagocytic cup formation:ABL1 | HDR through Homologous Recombination (HRR) or Single Strand Annealing (SSA):ABL1 | Homology Directed Repair:ABL1 | D…	thrombocytosis:ABL1 | polycythemia:ABL1 | bone marrow disease:ABL1 | hemorrhagic disease:ABL1 | myeloma:ABL1 | blood coagulation disease:ABL1 | lymphoid leukemia:ABL1 | bone marrow cancer:ABL1	substrate adhesion-dependent cell spreading:ABL1,LAMC3 | regulation of substrate adhesion-dependent cell spreading:ABL1 | positive regulation of substrate adhesion-dependent cell spreading:ABL1 | positive regulation of cell-matrix adhesion:ABL1 | negative regulation of protein phosphorylation:ABL1 | regulation of cell-matrix adhesion:ABL1 | positive regulation of cell-substrate adhesion:ABL1 | re…		IL_10	6.86711	6.86711	0.0693699		C	T	0.0229328	0.0229328	387	0.993	0	FALSE	0.271314	1.69135	1.44234
rs73656062:133745670:A:G	FALSE		9	9q34.12	a340	133745670	rs12006244:133743416:G:A	0.997829	FALSE	ABL1 (0 kb, intron/Intron/MODIFIER); QRFP (23 kb); FIBCD1 (32 kb); LAMC3 (140 kb)	ABL1:protein_coding(KNOWN); QRFP:protein_coding(KNOWN); FIBCD1:protein_coding(KNOWN); LAMC3:protein_coding(KNOWN)	ABL1: c-abl oncogene 1, non-receptor tyrosine kinase (0 kb)	0.216151	1.09048	4.24	0.677296	0.34	0.23	0.28	4	4	Chromatin_Structure|DNase-seq|Mcf7|, Chromatin_Structure|DNase-seq|Mcf7|Hypoxlac, Chromatin_Structure|DNase-seq|Mcf7|Hypoxlaccon, Chromatin_Structure|DNase-seq|Hmveclbl|, Chromatin_Structure|DNase-seq|Helas3|, Chromatin_Structure|DNase-seq|Helas3|Ifna4h, Chromatin_Structure|DNase-seq|Hconf|, Chromatin_Structure|DNase-seq|Wi38|, Chromatin_Structure|DNase-seq|Hpf|, Chromatin_Structure|DNase-seq|Hee…	NA	EXOSC2 | FIBCD1 | FNBP1 | FUBP3 | LOC401554	ARC | NPAS4 | PRAME | SLC47A2 | ZMYND10	ABL1 AIF1L ARC EXOSC2 FIBCD1 FNBP1 FUBP3 LAMC3 LOC401554 NPAS4 PRAME PRDM12 QRFP SLC47A2 ZMYND10	ABL1, EXOSC2, FIBCD1, LAMC3, QRFP	10319, 23404, 25, 347148, 84929	Small cell lung cancer:LAMC3 | Axon guidance:ABL1 | Focal adhesion:LAMC3 | ErbB signaling pathway:ABL1 | Amoebiasis:LAMC3 | Viral myocarditis:ABL1 | Ras signaling pathway:ABL1	HDR through Single Strand Annealing (SSA):ABL1 | MET promotes cell motility:LAMC3 | MET activates PTK2 signaling:LAMC3 | RHO GTPases Activate WASPs and WAVEs:ABL1 | Signaling by MET:LAMC3 | RHO GTPase Effectors:ABL1 | Regulation of actin dynamics for phagocytic cup formation:ABL1 | HDR through Homologous Recombination (HRR) or Single Strand Annealing (SSA):ABL1 | Homology Directed Repair:ABL1 | D…	thrombocytosis:ABL1 | polycythemia:ABL1 | bone marrow disease:ABL1 | hemorrhagic disease:ABL1 | myeloma:ABL1 | blood coagulation disease:ABL1 | lymphoid leukemia:ABL1 | bone marrow cancer:ABL1	substrate adhesion-dependent cell spreading:ABL1,LAMC3 | regulation of substrate adhesion-dependent cell spreading:ABL1 | positive regulation of substrate adhesion-dependent cell spreading:ABL1 | positive regulation of cell-matrix adhesion:ABL1 | negative regulation of protein phosphorylation:ABL1 | regulation of cell-matrix adhesion:ABL1 | positive regulation of cell-substrate adhesion:ABL1 | re…		IL_10	6.77145	6.77145	0.068343		G	A	0.0229381	0.0229381	387	0.989	0	FALSE	0.272201	1.69031	1.44246
rs73656063:133745915:C:A	FALSE		9	9q34.12	a340	133745915	rs12006244:133743416:G:A	0.997261	FALSE	ABL1 (0 kb, intron/Intron/MODIFIER); QRFP (23 kb); FIBCD1 (32 kb); LAMC3 (140 kb)	ABL1:protein_coding(KNOWN); QRFP:protein_coding(KNOWN); FIBCD1:protein_coding(KNOWN); LAMC3:protein_coding(KNOWN)	ABL1: c-abl oncogene 1, non-receptor tyrosine kinase (0 kb)	-0.0999388	-0.0846074	6.998	0.595866	0.33	0.17	0.24	5	5	Chromatin_Structure|FAIRE|Helas3|Ifng4h, Chromatin_Structure|DNase-seq|Cerebellumoc|, Chromatin_Structure|DNase-seq|Hah|, Chromatin_Structure|DNase-seq|Ecc1|Dm002p1h, Chromatin_Structure|DNase-seq|Ecc1|Est10nm30m, Chromatin_Structure|DNase-seq|Be2c|, Chromatin_Structure|DNase-seq|Ishikawa|Est10nm30m	NA	EXOSC2 | FIBCD1 | FNBP1 | FUBP3 | LOC401554	ARC | NPAS4 | PRAME | SLC47A2 | ZMYND10	ABL1 AIF1L ARC EXOSC2 FIBCD1 FNBP1 FUBP3 LAMC3 LOC401554 NPAS4 PRAME PRDM12 QRFP SLC47A2 ZMYND10	ABL1, EXOSC2, FIBCD1, LAMC3, QRFP	10319, 23404, 25, 347148, 84929	Small cell lung cancer:LAMC3 | Axon guidance:ABL1 | Focal adhesion:LAMC3 | ErbB signaling pathway:ABL1 | Amoebiasis:LAMC3 | Viral myocarditis:ABL1 | Ras signaling pathway:ABL1	HDR through Single Strand Annealing (SSA):ABL1 | MET promotes cell motility:LAMC3 | MET activates PTK2 signaling:LAMC3 | RHO GTPases Activate WASPs and WAVEs:ABL1 | Signaling by MET:LAMC3 | RHO GTPase Effectors:ABL1 | Regulation of actin dynamics for phagocytic cup formation:ABL1 | HDR through Homologous Recombination (HRR) or Single Strand Annealing (SSA):ABL1 | Homology Directed Repair:ABL1 | D…	thrombocytosis:ABL1 | polycythemia:ABL1 | bone marrow disease:ABL1 | hemorrhagic disease:ABL1 | myeloma:ABL1 | blood coagulation disease:ABL1 | lymphoid leukemia:ABL1 | bone marrow cancer:ABL1	substrate adhesion-dependent cell spreading:ABL1,LAMC3 | regulation of substrate adhesion-dependent cell spreading:ABL1 | positive regulation of substrate adhesion-dependent cell spreading:ABL1 | positive regulation of cell-matrix adhesion:ABL1 | negative regulation of protein phosphorylation:ABL1 | regulation of cell-matrix adhesion:ABL1 | positive regulation of cell-substrate adhesion:ABL1 | re…		IL_10	6.75854	6.75854	0.0682043		A	C	0.0229367	0.0229367	387	0.989	0	FALSE	0.272242	1.68981	1.44212
rs35102781:133736858:A:C	FALSE		9	9q34.12	a340	133736858	rs12006244:133743416:G:A	0.969894	FALSE	ABL1 (0 kb, intron/Intron/MODIFIER); QRFP (32 kb); FIBCD1 (41 kb); LAMC3 (150 kb)	ABL1:protein_coding(KNOWN); QRFP:protein_coding(KNOWN); FIBCD1:protein_coding(KNOWN); LAMC3:protein_coding(KNOWN)	ABL1: c-abl oncogene 1, non-receptor tyrosine kinase (0 kb)	0.164412	0.274777	2.824	0.591066	0.41	0.24	0.24	3a	3	Motifs|PWM|Foxa2|, Chromatin_Structure|DNase-seq|Helas3|, Protein_Binding|ChIP-seq|POLR2A|IMR90|, Protein_Binding|ChIP-seq|POLR2A|IMR90|	NA	EXOSC2 | FNBP1 | FUBP3	ARC | NPAS4 | PRAME | SLC47A2 | ZMYND10	ABL1 AIF1L ARC EXOSC2 FIBCD1 FNBP1 FUBP3 LAMC3 NPAS4 PRAME PRDM12 QRFP SLC47A2 ZMYND10	ABL1, EXOSC2, FIBCD1, LAMC3, QRFP	10319, 23404, 25, 347148, 84929	Small cell lung cancer:LAMC3 | Axon guidance:ABL1 | Focal adhesion:LAMC3 | ErbB signaling pathway:ABL1 | Amoebiasis:LAMC3 | Viral myocarditis:ABL1 | Ras signaling pathway:ABL1	HDR through Single Strand Annealing (SSA):ABL1 | MET promotes cell motility:LAMC3 | MET activates PTK2 signaling:LAMC3 | RHO GTPases Activate WASPs and WAVEs:ABL1 | Signaling by MET:LAMC3 | RHO GTPase Effectors:ABL1 | Regulation of actin dynamics for phagocytic cup formation:ABL1 | HDR through Homologous Recombination (HRR) or Single Strand Annealing (SSA):ABL1 | Homology Directed Repair:ABL1 | D…	thrombocytosis:ABL1 | polycythemia:ABL1 | bone marrow disease:ABL1 | hemorrhagic disease:ABL1 | myeloma:ABL1 | blood coagulation disease:ABL1 | lymphoid leukemia:ABL1 | bone marrow cancer:ABL1	substrate adhesion-dependent cell spreading:ABL1,LAMC3 | regulation of substrate adhesion-dependent cell spreading:ABL1 | positive regulation of substrate adhesion-dependent cell spreading:ABL1 | positive regulation of cell-matrix adhesion:ABL1 | negative regulation of protein phosphorylation:ABL1 | regulation of cell-matrix adhesion:ABL1 | positive regulation of cell-substrate adhesion:ABL1 | re…		IL_10	6.7199	6.7199	0.0677896		C	A	0.0219638	0.0219638	387	1	2	FALSE	0.287716	1.69446	1.4287
rs34082168:133751972:A:AT	FALSE		9	9q34.12	a340	133751972	rs12006244:133743416:G:A	0.962373	FALSE	ABL1 (0 kb, intron/Intron/MODIFIER); QRFP (17 kb); FIBCD1 (26 kb); LAMC3 (130 kb)	ABL1:protein_coding(KNOWN); QRFP:protein_coding(KNOWN); FIBCD1:protein_coding(KNOWN); LAMC3:protein_coding(KNOWN)	ABL1: c-abl oncogene 1, non-receptor tyrosine kinase (0 kb)								7	7		NA	EXOSC2 | FIBCD1 | FNBP1 | FUBP3 | LOC401554	ARC | NPAS4 | PRAME | SLC47A2 | ZMYND10	ABL1 AIF1L ARC EXOSC2 FIBCD1 FNBP1 FUBP3 LAMC3 LOC401554 NPAS4 NUP214 PRAME PRDM12 QRFP SLC47A2 ZMYND10	ABL1, EXOSC2, FIBCD1, LAMC3, QRFP	10319, 23404, 25, 347148, 84929	Small cell lung cancer:LAMC3 | Axon guidance:ABL1 | Focal adhesion:LAMC3 | ErbB signaling pathway:ABL1 | Amoebiasis:LAMC3 | Viral myocarditis:ABL1 | Ras signaling pathway:ABL1	HDR through Single Strand Annealing (SSA):ABL1 | MET promotes cell motility:LAMC3 | MET activates PTK2 signaling:LAMC3 | RHO GTPases Activate WASPs and WAVEs:ABL1 | Signaling by MET:LAMC3 | RHO GTPase Effectors:ABL1 | Regulation of actin dynamics for phagocytic cup formation:ABL1 | HDR through Homologous Recombination (HRR) or Single Strand Annealing (SSA):ABL1 | Homology Directed Repair:ABL1 | D…	thrombocytosis:ABL1 | polycythemia:ABL1 | bone marrow disease:ABL1 | hemorrhagic disease:ABL1 | myeloma:ABL1 | blood coagulation disease:ABL1 | lymphoid leukemia:ABL1 | bone marrow cancer:ABL1	substrate adhesion-dependent cell spreading:ABL1,LAMC3 | regulation of substrate adhesion-dependent cell spreading:ABL1 | positive regulation of substrate adhesion-dependent cell spreading:ABL1 | positive regulation of cell-matrix adhesion:ABL1 | negative regulation of protein phosphorylation:ABL1 | regulation of cell-matrix adhesion:ABL1 | positive regulation of cell-substrate adhesion:ABL1 | re…		IL_10	6.29318	6.29318	0.0632005		AT	A	0.0229587	0.0229587	387	0.981	0	FALSE	0.266835	1.63708	1.40006
rs73656059:133740249:C:G	FALSE		9	9q34.12	a340	133740249	rs12006244:133743416:G:A	0.923163	FALSE	ABL1 (0 kb, intron/Intron/MODIFIER); QRFP (29 kb); FIBCD1 (38 kb); LAMC3 (140 kb)	ABL1:protein_coding(KNOWN); QRFP:protein_coding(KNOWN); FIBCD1:protein_coding(KNOWN); LAMC3:protein_coding(KNOWN)	ABL1: c-abl oncogene 1, non-receptor tyrosine kinase (0 kb)	-0.440936	-0.122855	1.042	0.393009	0.32	0.19	0.12	5	5	Protein_Binding|ChIP-seq|CTCF|HeLa-S3|	NA	EXOSC2 | FNBP1 | FUBP3	ARC | NPAS4 | PRAME | SLC47A2 | ZMYND10	ABL1 AIF1L ARC EXOSC2 FIBCD1 FNBP1 FUBP3 LAMC3 NPAS4 PRAME PRDM12 QRFP SLC47A2 ZMYND10	ABL1, EXOSC2, FIBCD1, LAMC3, QRFP	10319, 23404, 25, 347148, 84929	Small cell lung cancer:LAMC3 | Axon guidance:ABL1 | Focal adhesion:LAMC3 | ErbB signaling pathway:ABL1 | Amoebiasis:LAMC3 | Viral myocarditis:ABL1 | Ras signaling pathway:ABL1	HDR through Single Strand Annealing (SSA):ABL1 | MET promotes cell motility:LAMC3 | MET activates PTK2 signaling:LAMC3 | RHO GTPases Activate WASPs and WAVEs:ABL1 | Signaling by MET:LAMC3 | RHO GTPase Effectors:ABL1 | Regulation of actin dynamics for phagocytic cup formation:ABL1 | HDR through Homologous Recombination (HRR) or Single Strand Annealing (SSA):ABL1 | Homology Directed Repair:ABL1 | D…	thrombocytosis:ABL1 | polycythemia:ABL1 | bone marrow disease:ABL1 | hemorrhagic disease:ABL1 | myeloma:ABL1 | blood coagulation disease:ABL1 | lymphoid leukemia:ABL1 | bone marrow cancer:ABL1	substrate adhesion-dependent cell spreading:ABL1,LAMC3 | regulation of substrate adhesion-dependent cell spreading:ABL1 | positive regulation of substrate adhesion-dependent cell spreading:ABL1 | positive regulation of cell-matrix adhesion:ABL1 | negative regulation of protein phosphorylation:ABL1 | regulation of cell-matrix adhesion:ABL1 | positive regulation of cell-substrate adhesion:ABL1 | re…		IL_10	6.14471	6.14471	0.0616013		G	C	0.0202223	0.0202223	387	0.96	0	FALSE	0.331462	1.71453	1.47741
rs36070045:133608445:G:A	FALSE		9	9q34.12	a340	133608445	rs36070045:133608445:G:A	1	TRUE	ABL1 (0 kb, intron/Intron/MODIFIER); EXOSC2 (28 kb); PRDM12 (50 kb); FUBP3 (95 kb)	ABL1:protein_coding(KNOWN); EXOSC2:protein_coding(KNOWN); PRDM12:protein_coding(KNOWN); FUBP3:protein_coding(KNOWN)	ABL1: c-abl oncogene 1, non-receptor tyrosine kinase (0 kb)	0.0570104	1.13467	2.119	0.549654	0.48	0.44	0.39	4	4		NA	EXOSC2 | FNBP1 | FUBP3	ARC | NPAS4 | SLC47A2 | ZMYND10	ABL1 ARC ASS1 EXOSC2 FIBCD1 FNBP1 FUBP3 NPAS4 PRDM12 QRFP SLC47A2 ZMYND10	ABL1, EXOSC2, FUBP3, PRDM12	23404, 25, 59335, 8939	Axon guidance:ABL1 | ErbB signaling pathway:ABL1 | Viral myocarditis:ABL1 | Ras signaling pathway:ABL1	HDR through Single Strand Annealing (SSA):ABL1 | RHO GTPases Activate WASPs and WAVEs:ABL1 | RHO GTPase Effectors:ABL1 | Regulation of actin dynamics for phagocytic cup formation:ABL1 | HDR through Homologous Recombination (HRR) or Single Strand Annealing (SSA):ABL1 | Homology Directed Repair:ABL1 | DNA Double-Strand Break Repair:ABL1 | Transcriptional regulation by RUNX1:ABL1 | Fcgamma receptor …	thrombocytosis:ABL1 | polycythemia:ABL1 | bone marrow disease:ABL1 | hemorrhagic disease:ABL1 | myeloma:ABL1 | blood coagulation disease:ABL1 | lymphoid leukemia:ABL1 | bone marrow cancer:ABL1	substrate adhesion-dependent cell spreading:ABL1 | regulation of substrate adhesion-dependent cell spreading:ABL1 | positive regulation of substrate adhesion-dependent cell spreading:ABL1 | positive regulation of cell-matrix adhesion:ABL1 | negative regulation of protein phosphorylation:ABL1 | regulation of cell-matrix adhesion:ABL1 | positive regulation of cell-substrate adhesion:ABL1 | regulati…		IL_12	6.05923	6.05923	0.0611396		A	G	0.0338542	0.0338542	384	1	2	FALSE	0.0490184	1.21713	1.19075
rs72766708:1645922:G:A	FALSE		10	10p15.3	a342	1645922	rs72766708:1645922:G:A	1	TRUE	ADARB2 (0 kb, intron/Intron/MODIFIER); ADARB2-AS1 (47 kb)	ADARB2:protein_coding(KNOWN); ADARB2-AS1:antisense(KNOWN)	ADARB2: adenosine deaminase, RNA-specific, B2 (non-functional) (0 kb)	-0.0661948	-0.184192	1.172	0.540185	0.27	0.21	0.09	6	6		NA			ADARB2 ADARB2-AS1	ADARB2, ADARB2-AS1	105, 642394				RNA modification:ADARB2		MCP_1_MCAF	6.41846	6.41846	0.0643883		A	G	0.0127087	0.0127087	388	0.833	0	FALSE	0.258078	1.04349	0.408615
rs61829263:3230251:C:T	FALSE		10	10p15.2	a342	3230251	rs61829263:3230251:C:T	1	TRUE	PITRM1 (15 kb); PITRM1-AS1 (20 kb); PFKP (50 kb)	PITRM1:protein_coding(KNOWN); PITRM1-AS1:processed_transcript(KNOWN); PFKP:protein_coding(KNOWN)	PITRM1: pitrilysin metallopeptidase 1 (15 kb)	-0.439176	-0.227409	0.424	0.45343	0.34	0.41	0.11	7	7		NA	PFKP | PITRM1 | PITRM1-AS1	BAZ2B | CFP	BAZ2B CFP PFKP PITRM1 PITRM1-AS1	PFKP, PITRM1, PITRM1-AS1, RP11-118K6.3	100507034, 101927824, 10531, 5214				nucleotide catabolic process:PFKP | nucleoside phosphate catabolic process:PFKP | nucleobase-containing small molecule biosynthetic process:PFKP | organophosphate catabolic process:PFKP | protein homotetramerization:PFKP | establishment of protein localization to mitochondrion:PITRM1 | protein localization to mitochondrion:PITRM1 | protein homooligomerization:PFKP		MIP_1A	6.27064	6.27064	0.065931		T	C	0.0223361	0.0223361	369	0.94	0	FALSE	0.133089	0.170661	0.400786
rs4242749:3228800:T:C	FALSE		10	10p15.2	a342	3228800	rs61829263:3230251:C:T	0.940083	FALSE	PITRM1 (14 kb); PITRM1-AS1 (19 kb); PFKP (49 kb)	PITRM1:protein_coding(KNOWN); PITRM1-AS1:processed_transcript(KNOWN); PFKP:protein_coding(KNOWN)	PITRM1: pitrilysin metallopeptidase 1 (14 kb)	-0.809377	-0.279124	0.135	0.142817	0.47	0.49	0.19	3a	3	Motifs|PWM|AR|, Motifs|PWM|AR|, Motifs|PWM|NR3C1|, Chromatin_Structure|DNase-seq|Adultcd4th1|, Chromatin_Structure|DNase-seq|K562|, Chromatin_Structure|DNase-seq|Adultcd4th0|, Chromatin_Structure|DNase-seq|Cd4naivewb11970640|, Chromatin_Structure|DNase-seq|Cd4naivewb78495824|, Chromatin_Structure|DNase-seq|Th1wb33676984|, Chromatin_Structure|DNase-seq|Th2wb33676984|, Chromatin_Structure|DNase-seq…	NA	PFKP | PITRM1 | PITRM1-AS1	BAZ2B | CFP	BAZ2B CFP PFKP PITRM1 PITRM1-AS1	PFKP, PITRM1, PITRM1-AS1, RP11-118K6.3	100507034, 101927824, 10531, 5214				nucleotide catabolic process:PFKP | nucleoside phosphate catabolic process:PFKP | nucleobase-containing small molecule biosynthetic process:PFKP | organophosphate catabolic process:PFKP | protein homotetramerization:PFKP | establishment of protein localization to mitochondrion:PITRM1 | protein localization to mitochondrion:PITRM1 | protein homooligomerization:PFKP		MIP_1A	6.26889	6.26889	0.0659109		T	C	0.0203252	0.0203252	369	1	2	FALSE	0.152602	0.245349	0.441785
rs72764998:1633523:C:G	FALSE		10	10p15.3	a342	1633523	rs72766708:1645922:G:A	0.983851	FALSE	ADARB2 (0 kb, intron/Intron/MODIFIER); ADARB2-AS1 (34 kb)	ADARB2:protein_coding(KNOWN); ADARB2-AS1:antisense(KNOWN)	ADARB2: adenosine deaminase, RNA-specific, B2 (non-functional) (0 kb)	-0.214332	-0.203073	5.672	0.825676	0.3	0.31	0.12	5	5		NA			ADARB2 ADARB2-AS1	ADARB2, ADARB2-AS1	105, 642394				RNA modification:ADARB2		MCP_1_MCAF	6.21021	6.21021	0.062151		G	C	0.0128786	0.0128786	388	0.861	0	FALSE	0.235166	1.115	0.445237
rs36116530:3232584:T:C	FALSE		10	10p15.2	a342	3232584	rs61829263:3230251:C:T	0.992719	FALSE	PITRM1 (18 kb); PITRM1-AS1 (22 kb); PFKP (53 kb)	PITRM1:protein_coding(KNOWN); PITRM1-AS1:processed_transcript(KNOWN); PFKP:protein_coding(KNOWN)	PITRM1: pitrilysin metallopeptidase 1 (18 kb)	0.100061	-0.14642	3.591	0.425246	0.4	0.35	0.1	6	6		NA	PFKP | PITRM1 | PITRM1-AS1	BAZ2B | CFP	BAZ2B CFP PFKP PITRM1 PITRM1-AS1	PFKP, PITRM1, PITRM1-AS1, RP11-118K6.3	100507034, 101927824, 10531, 5214				nucleotide catabolic process:PFKP | nucleoside phosphate catabolic process:PFKP | nucleobase-containing small molecule biosynthetic process:PFKP | organophosphate catabolic process:PFKP | protein homotetramerization:PFKP | establishment of protein localization to mitochondrion:PITRM1 | protein localization to mitochondrion:PITRM1 | protein homooligomerization:PFKP		MIP_1A	6.17097	6.17097	0.0648083		C	T	0.0228562	0.0228562	369	0.942	0	FALSE	0.130083	0.155645	0.382535
rs78207995:3231614:A:G	FALSE		10	10p15.2	a342	3231614	rs61829263:3230251:C:T	0.995944	FALSE	PITRM1 (17 kb); PITRM1-AS1 (21 kb); PFKP (52 kb)	PITRM1:protein_coding(KNOWN); PITRM1-AS1:processed_transcript(KNOWN); PFKP:protein_coding(KNOWN)	PITRM1: pitrilysin metallopeptidase 1 (17 kb)	-0.348382	-0.21509	4.022	0.575474	0.42	0.15	0.04	7	7		NA	PFKP | PITRM1 | PITRM1-AS1	BAZ2B | CFP	BAZ2B CFP PFKP PITRM1 PITRM1-AS1	PFKP, PITRM1, PITRM1-AS1, RP11-118K6.3	100507034, 101927824, 10531, 5214				nucleotide catabolic process:PFKP | nucleoside phosphate catabolic process:PFKP | nucleobase-containing small molecule biosynthetic process:PFKP | organophosphate catabolic process:PFKP | protein homotetramerization:PFKP | establishment of protein localization to mitochondrion:PITRM1 | protein localization to mitochondrion:PITRM1 | protein homooligomerization:PFKP		MIP_1A	6.1708	6.1708	0.0648065		G	A	0.0227099	0.0227099	369	0.944	0	FALSE	0.130136	0.159303	0.389106
rs61829268:3232207:T:C	FALSE		10	10p15.2	a342	3232207	rs61829263:3230251:C:T	0.994112	FALSE	PITRM1 (17 kb); PITRM1-AS1 (22 kb); PFKP (52 kb)	PITRM1:protein_coding(KNOWN); PITRM1-AS1:processed_transcript(KNOWN); PFKP:protein_coding(KNOWN)	PITRM1: pitrilysin metallopeptidase 1 (17 kb)	-0.52045	-0.247345	0.194	0.388528	0.31	0.25	0.07	6	6		NA	PFKP | PITRM1 | PITRM1-AS1	BAZ2B | CFP	BAZ2B CFP PFKP PITRM1 PITRM1-AS1	PFKP, PITRM1, PITRM1-AS1, RP11-118K6.3	100507034, 101927824, 10531, 5214				nucleotide catabolic process:PFKP | nucleoside phosphate catabolic process:PFKP | nucleobase-containing small molecule biosynthetic process:PFKP | organophosphate catabolic process:PFKP | protein homotetramerization:PFKP | establishment of protein localization to mitochondrion:PITRM1 | protein localization to mitochondrion:PITRM1 | protein homooligomerization:PFKP		MIP_1A	6.17052	6.17052	0.0648029		C	T	0.0228047	0.0228047	369	0.942	0	FALSE	0.130145	0.156761	0.384903
rs61829267:3230808:G:A	FALSE		10	10p15.2	a342	3230808	rs61829263:3230251:C:T	0.997678	FALSE	PITRM1 (16 kb); PITRM1-AS1 (21 kb); PFKP (51 kb)	PITRM1:protein_coding(KNOWN); PITRM1-AS1:processed_transcript(KNOWN); PFKP:protein_coding(KNOWN)	PITRM1: pitrilysin metallopeptidase 1 (16 kb)	-0.479743	-0.236561	0.418	0.364868	0.3	0.37	0.12	6	6		NA	PFKP | PITRM1 | PITRM1-AS1	BAZ2B | CFP	BAZ2B CFP PFKP PITRM1 PITRM1-AS1	PFKP, PITRM1, PITRM1-AS1, RP11-118K6.3	100507034, 101927824, 10531, 5214				nucleotide catabolic process:PFKP | nucleoside phosphate catabolic process:PFKP | nucleobase-containing small molecule biosynthetic process:PFKP | organophosphate catabolic process:PFKP | protein homotetramerization:PFKP | establishment of protein localization to mitochondrion:PITRM1 | protein localization to mitochondrion:PITRM1 | protein homooligomerization:PFKP		MIP_1A	6.16538	6.16538	0.0647454		A	G	0.0225824	0.0225824	369	0.946	0	FALSE	0.130208	0.16209	0.394053
rs141736350:3229670:T:C	FALSE		10	10p15.2	a342	3229670	rs61829263:3230251:C:T	0.980867	FALSE	PITRM1 (15 kb); PITRM1-AS1 (20 kb); PFKP (50 kb)	PITRM1:protein_coding(KNOWN); PITRM1-AS1:processed_transcript(KNOWN); PFKP:protein_coding(KNOWN)	PITRM1: pitrilysin metallopeptidase 1 (15 kb)	-0.122808	-0.184096	6.397	0.804232	0.33	0.3	0.12	5	5		NA	PFKP | PITRM1 | PITRM1-AS1	BAZ2B | CFP	BAZ2B CFP PFKP PITRM1 PITRM1-AS1	PFKP, PITRM1, PITRM1-AS1, RP11-118K6.3	100507034, 101927824, 10531, 5214				nucleotide catabolic process:PFKP | nucleoside phosphate catabolic process:PFKP | nucleobase-containing small molecule biosynthetic process:PFKP | organophosphate catabolic process:PFKP | protein homotetramerization:PFKP | establishment of protein localization to mitochondrion:PITRM1 | protein localization to mitochondrion:PITRM1 | protein homooligomerization:PFKP		MIP_1A	6.12347	6.12347	0.0642735		C	T	0.0208483	0.0208483	369	0.934	0	FALSE	0.148884	0.210994	0.431631
rs61829294:3236406:A:T	FALSE		10	10p15.2	a342	3236406	rs61829263:3230251:C:T	0.968321	FALSE	PITRM1 (21 kb); PITRM1-AS1 (26 kb); PFKP (57 kb)	PITRM1:protein_coding(KNOWN); PITRM1-AS1:processed_transcript(KNOWN); PFKP:protein_coding(KNOWN)	PITRM1: pitrilysin metallopeptidase 1 (21 kb)	-0.262851	-0.189112	1.961	0.486332	0.41	0.32	0.18	5	5		NA	PFKP | PITRM1 | PITRM1-AS1	BAZ2B | CFP	BAZ2B CFP PFKP PITRM1 PITRM1-AS1	PFKP, PITRM1, PITRM1-AS1, RP11-118K6.3	100507034, 101927824, 10531, 5214				nucleotide catabolic process:PFKP | nucleoside phosphate catabolic process:PFKP | nucleobase-containing small molecule biosynthetic process:PFKP | organophosphate catabolic process:PFKP | protein homotetramerization:PFKP | establishment of protein localization to mitochondrion:PITRM1 | protein localization to mitochondrion:PITRM1 | protein homooligomerization:PFKP		MIP_1A	6.10211	6.10211	0.0640319		T	A	0.0234512	0.0234512	369	0.947	0	FALSE	0.127859	0.139728	0.353052
rs11816067:3240979:A:G	FALSE		10	10p15.2	a342	3240979	rs61829263:3230251:C:T	0.925192	FALSE	PITRM1 (26 kb); PITRM1-AS1 (31 kb); PFKP (61 kb)	PITRM1:protein_coding(KNOWN); PITRM1-AS1:processed_transcript(KNOWN); PFKP:protein_coding(KNOWN)	PITRM1: pitrilysin metallopeptidase 1 (26 kb)	-0.832287	-0.274393	0.171	0.305736	0.56	0.55	0.38	5	5	Protein_Binding|ChIP-seq|SPI1|HSPC|	NA	PFKP | PITRM1-AS1	BAZ2B | CFP	BAZ2B CFP PFKP PITRM1 PITRM1-AS1	PFKP, PITRM1, PITRM1-AS1, RP11-118K6.3	100507034, 101927824, 10531, 5214				nucleotide catabolic process:PFKP | nucleoside phosphate catabolic process:PFKP | nucleobase-containing small molecule biosynthetic process:PFKP | organophosphate catabolic process:PFKP | protein homotetramerization:PFKP | establishment of protein localization to mitochondrion:PITRM1 | protein localization to mitochondrion:PITRM1 | protein homooligomerization:PFKP		MIP_1A	6.04339	6.04339	0.0633701		G	A	0.0250108	0.0250108	369	0.931	0	FALSE	0.126811	0.125717	0.328098
rs11816442:3240793:T:C	FALSE		10	10p15.2	a342	3240793	rs61829263:3230251:C:T	0.926205	FALSE	PITRM1 (26 kb); PITRM1-AS1 (31 kb); PFKP (61 kb)	PITRM1:protein_coding(KNOWN); PITRM1-AS1:processed_transcript(KNOWN); PFKP:protein_coding(KNOWN)	PITRM1: pitrilysin metallopeptidase 1 (26 kb)	-0.608454	-0.253907	0.482	0.371647	0.36	0.58	0.38	7	7		NA	PFKP | PITRM1-AS1	BAZ2B | CFP	BAZ2B CFP PFKP PITRM1 PITRM1-AS1	PFKP, PITRM1, PITRM1-AS1, RP11-118K6.3	100507034, 101927824, 10531, 5214				nucleotide catabolic process:PFKP | nucleoside phosphate catabolic process:PFKP | nucleobase-containing small molecule biosynthetic process:PFKP | organophosphate catabolic process:PFKP | protein homotetramerization:PFKP | establishment of protein localization to mitochondrion:PITRM1 | protein localization to mitochondrion:PITRM1 | protein homooligomerization:PFKP		MIP_1A	6.01648	6.01648	0.0630667		C	T	0.0249335	0.0249335	369	0.943	0	FALSE	0.125354	0.121465	0.324796
rs75237116:12655293:C:T	FALSE		10	10p13	a344	12655293	rs75237116:12655293:C:T	1	TRUE	CAMK1D (0 kb, intron/Intron/MODIFIER | nc-RNA/Non coding transcript/MODIFIER); MIR4480 (34 kb); MIR548Q (110 kb); RNU6ATAC39P (160 kb)	CAMK1D:protein_coding(KNOWN); MIR4480:miRNA(KNOWN); MIR548Q:miRNA(KNOWN); RNU6ATAC39P:snRNA(KNOWN)	CAMK1D: calcium/calmodulin-dependent protein kinase ID (0 kb)	0.241143	-0.140078	6.225	0.681677	0.34	0.29	0.11	5	5	Chromatin_Structure|DNase-seq|H7es|Diffa2d, Chromatin_Structure|DNase-seq|H7es|, Chromatin_Structure|DNase-seq|Hre|	NA	C10orf47 | USP6NL	DDX11 | MTNR1A	C10orf47 CAMK1D DDX11 MIR4480 MIR548Q MTNR1A RNU6ATAC39P USP6NL	CAMK1D, MIR4480, MIR548Q	100313841, 100616151, 57118				regulation of granulocyte chemotaxis:CAMK1D | regulation of leukocyte chemotaxis:CAMK1D | positive regulation of chemotaxis:CAMK1D | positive regulation of cell projection organization:CAMK1D | positive regulation of CREB transcription factor activity:CAMK1D | positive regulation of leukocyte chemotaxis:CAMK1D | positive regulation of neuron projection development:CAMK1D | regulation of dendrite …		MIP_1A	8.64182	8.64182	0.0923993		T	C	0.0114376	0.0114376	369	0.938	0	FALSE	-0.110155	2.10068	1.67475
rs28583766:12655764:G:A	FALSE		10	10p13	a344	12655764	rs75237116:12655293:C:T	0.992123	FALSE	CAMK1D (0 kb, intron/Intron/MODIFIER | nc-RNA/Non coding transcript/MODIFIER); MIR4480 (35 kb); MIR548Q (110 kb); RNU6ATAC39P (160 kb)	CAMK1D:protein_coding(KNOWN); MIR4480:miRNA(KNOWN); MIR548Q:miRNA(KNOWN); RNU6ATAC39P:snRNA(KNOWN)	CAMK1D: calcium/calmodulin-dependent protein kinase ID (0 kb)	-1.18782	-0.320617	0.015	0.724763	0.22	0.11	0.03	7	7		NA	C10orf47 | USP6NL	DDX11 | MTNR1A	C10orf47 CAMK1D DDX11 MIR4480 MIR548Q MTNR1A RNU6ATAC39P USP6NL	CAMK1D, MIR4480, MIR548Q	100313841, 100616151, 57118				regulation of granulocyte chemotaxis:CAMK1D | regulation of leukocyte chemotaxis:CAMK1D | positive regulation of chemotaxis:CAMK1D | positive regulation of cell projection organization:CAMK1D | positive regulation of CREB transcription factor activity:CAMK1D | positive regulation of leukocyte chemotaxis:CAMK1D | positive regulation of neuron projection development:CAMK1D | regulation of dendrite …		MIP_1A	8.60255	8.60255	0.0919648		A	G	0.0118496	0.0118496	369	0.949	0	FALSE	-0.103356	2.09046	1.69953
rs7902334:12645941:C:A	FALSE		10	10p13	a344	12645941	rs7902334:12645941:C:A	1	TRUE	CAMK1D (0 kb, intron/Intron/MODIFIER | nc-RNA/Non coding transcript/MODIFIER); MIR4480 (25 kb); MIR548Q (120 kb); RNU6ATAC39P (150 kb)	CAMK1D:protein_coding(KNOWN); MIR4480:miRNA(KNOWN); MIR548Q:miRNA(KNOWN); RNU6ATAC39P:snRNA(KNOWN)	CAMK1D: calcium/calmodulin-dependent protein kinase ID (0 kb)	-0.622475	-0.212739	1.033	0.498636	0.32	0.22	0.11	2b	2	Motifs|PWM|MYF|, Motifs|PWM|Myf|, Motifs|Footprinting|MyoD|Gm12892, Motifs|Footprinting|MyoD|Helas3Ifna4h, Motifs|PWM|MyoD|, Motifs|PWM|E12|, Chromatin_Structure|DNase-seq|T47d|, Chromatin_Structure|DNase-seq|T47d|Est10nm30m, Chromatin_Structure|DNase-seq|Cerebellumoc|, Protein_Binding|ChIP-seq|FOXA1|T-47D|02pct	NA	C10orf47 | USP6NL		C10orf47 CAMK1D MIR4480 MIR548Q RNU6ATAC39P USP6NL	CAMK1D, MIR4480, MIR548Q	100313841, 100616151, 57118				regulation of granulocyte chemotaxis:CAMK1D | regulation of leukocyte chemotaxis:CAMK1D | positive regulation of chemotaxis:CAMK1D | positive regulation of cell projection organization:CAMK1D | positive regulation of CREB transcription factor activity:CAMK1D | positive regulation of leukocyte chemotaxis:CAMK1D | positive regulation of neuron projection development:CAMK1D | regulation of dendrite …		MIP_1A	7.60861	7.60861	0.0809268		C	A	0.0183876	0.0183876	369	0.965	0	FALSE	2.85326e-05	1.52955	1.28075
rs199589728:12648182:T:TGG	FALSE		10	10p13	a344	12648182	rs7902334:12645941:C:A	0.834486	FALSE	CAMK1D (0 kb, intron/Intron/MODIFIER | nc-RNA/Non coding transcript/MODIFIER); MIR4480 (27 kb); MIR548Q (120 kb); RNU6ATAC39P (150 kb)	CAMK1D:protein_coding(KNOWN); MIR4480:miRNA(KNOWN); MIR548Q:miRNA(KNOWN); RNU6ATAC39P:snRNA(KNOWN)	CAMK1D: calcium/calmodulin-dependent protein kinase ID (0 kb)			4.767					3a	3		NA	C10orf47 | USP6NL	DDX11 | MTNR1A	C10orf47 CAMK1D DDX11 MIR4480 MIR548Q MTNR1A RNU6ATAC39P USP6NL	CAMK1D, MIR4480, MIR548Q	100313841, 100616151, 57118				regulation of granulocyte chemotaxis:CAMK1D | regulation of leukocyte chemotaxis:CAMK1D | positive regulation of chemotaxis:CAMK1D | positive regulation of cell projection organization:CAMK1D | positive regulation of CREB transcription factor activity:CAMK1D | positive regulation of leukocyte chemotaxis:CAMK1D | positive regulation of neuron projection development:CAMK1D | regulation of dendrite …		MIP_1A	6.62104	6.62104	0.0698722		TGG	T	0.0160406	0.0160406	369	0.973	0	FALSE	0.0133319	1.79314	1.51709
10:12648185:T:G	FALSE		10	10p13	a344	12648185	rs7902334:12645941:C:A	0.834442	FALSE	CAMK1D (0 kb, intron/Intron/MODIFIER | nc-RNA/Non coding transcript/MODIFIER); MIR4480 (27 kb); MIR548Q (120 kb); RNU6ATAC39P (150 kb)	CAMK1D:protein_coding(KNOWN); MIR4480:miRNA(KNOWN); MIR548Q:miRNA(KNOWN); RNU6ATAC39P:snRNA(KNOWN)	CAMK1D: calcium/calmodulin-dependent protein kinase ID (0 kb)	0.0869009	1.58613		0.545814							NA	C10orf47 | USP6NL	DDX11 | MTNR1A	C10orf47 CAMK1D DDX11 MIR4480 MIR548Q MTNR1A RNU6ATAC39P USP6NL	CAMK1D, MIR4480, MIR548Q	100313841, 100616151, 57118				regulation of granulocyte chemotaxis:CAMK1D | regulation of leukocyte chemotaxis:CAMK1D | positive regulation of chemotaxis:CAMK1D | positive regulation of cell projection organization:CAMK1D | positive regulation of CREB transcription factor activity:CAMK1D | positive regulation of leukocyte chemotaxis:CAMK1D | positive regulation of neuron projection development:CAMK1D | regulation of dendrite …		MIP_1A	6.61966	6.61966	0.0698559		G	T	0.016042	0.016042	369	0.973	0	FALSE	0.013242	1.79291	1.51699
10:12648186:C:CGGGGGG	FALSE		10	10p13	a344	12648186	rs7902334:12645941:C:A	0.834485	FALSE	CAMK1D (0 kb, intron/Intron/MODIFIER | nc-RNA/Non coding transcript/MODIFIER); MIR4480 (27 kb); MIR548Q (120 kb); RNU6ATAC39P (150 kb)	CAMK1D:protein_coding(KNOWN); MIR4480:miRNA(KNOWN); MIR548Q:miRNA(KNOWN); RNU6ATAC39P:snRNA(KNOWN)	CAMK1D: calcium/calmodulin-dependent protein kinase ID (0 kb)								3a	3	3a:Motifs|PWM|SPDEF|, Chromatin_Structure|DNase-seq|T47d|, Chromatin_Structure|DNase-seq|Gm12892|, Chromatin_Structure|DNase-seq|T47d|Est10nm30m, Chromatin_Structure|DNase-seq|Cerebellumoc|, Chromatin_Structure|FAIRE|Gm12891|, Chromatin_Structure|DNase-seq|Gm12878|, Chromatin_Structure|DNase-seq|Cll|, Chromatin_Structure|DNase-seq|Gm12891|, Chromatin_Structure|DNase-seq|Gm10248|, Chromatin_Struct…	NA	C10orf47 | USP6NL	DDX11 | MTNR1A	C10orf47 CAMK1D DDX11 MIR4480 MIR548Q MTNR1A RNU6ATAC39P USP6NL	CAMK1D, MIR4480, MIR548Q	100313841, 100616151, 57118				regulation of granulocyte chemotaxis:CAMK1D | regulation of leukocyte chemotaxis:CAMK1D | positive regulation of chemotaxis:CAMK1D | positive regulation of cell projection organization:CAMK1D | positive regulation of CREB transcription factor activity:CAMK1D | positive regulation of leukocyte chemotaxis:CAMK1D | positive regulation of neuron projection development:CAMK1D | regulation of dendrite …		MIP_1A	6.60042	6.60042	0.06964		CGGGGGG	C	0.0160162	0.0160162	369	0.974	0	FALSE	0.0135868	1.79186	1.51537
rs10795970:12655334:C:G	FALSE		10	10p13	a344	12655334	rs10795970:12655334:C:G	1	TRUE	CAMK1D (0 kb, intron/Intron/MODIFIER | nc-RNA/Non coding transcript/MODIFIER); MIR4480 (35 kb); MIR548Q (110 kb); RNU6ATAC39P (160 kb)	CAMK1D:protein_coding(KNOWN); MIR4480:miRNA(KNOWN); MIR548Q:miRNA(KNOWN); RNU6ATAC39P:snRNA(KNOWN)	CAMK1D: calcium/calmodulin-dependent protein kinase ID (0 kb)	0.0719388	-0.16667	3.738	0.333138	0.3	0.21	0.06	5	5	Chromatin_Structure|DNase-seq|H7es|Diffa2d, Chromatin_Structure|DNase-seq|H7es|, Chromatin_Structure|DNase-seq|Hre|, Chromatin_Structure|DNase-seq|Rptec|, Chromatin_Structure|DNase-seq|Hrce|	NA	C10orf47 | USP6NL	DDX11 | MTNR1A	C10orf47 CAMK1D DDX11 MIR4480 MIR548Q MTNR1A RNU6ATAC39P USP6NL	CAMK1D, MIR4480, MIR548Q	100313841, 100616151, 57118				regulation of granulocyte chemotaxis:CAMK1D | regulation of leukocyte chemotaxis:CAMK1D | positive regulation of chemotaxis:CAMK1D | positive regulation of cell projection organization:CAMK1D | positive regulation of CREB transcription factor activity:CAMK1D | positive regulation of leukocyte chemotaxis:CAMK1D | positive regulation of neuron projection development:CAMK1D | regulation of dendrite …		MIP_1A	6.19104	6.19104	0.0650342		G	C	0.0146179	0.0146179	369	0.942	0	FALSE	-0.163695	1.28299	1.17814
rs4484995:12655018:C:G	FALSE		10	10p13	a344	12655018	rs10795970:12655334:C:G	0.999906	FALSE	CAMK1D (0 kb, intron/Intron/MODIFIER | nc-RNA/Non coding transcript/MODIFIER); MIR4480 (34 kb); MIR548Q (110 kb); RNU6ATAC39P (160 kb)	CAMK1D:protein_coding(KNOWN); MIR4480:miRNA(KNOWN); MIR548Q:miRNA(KNOWN); RNU6ATAC39P:snRNA(KNOWN)	CAMK1D: calcium/calmodulin-dependent protein kinase ID (0 kb)	0.0127069	-0.173647	2.713	0.394509	0.34	0.26	0.06	6	6	Motifs|PWM|SREBP|, Motifs|Footprinting|SREBP|Cll, Motifs|PWM|Myf6|	NA	C10orf47 | USP6NL	DDX11 | MTNR1A	C10orf47 CAMK1D DDX11 MIR4480 MIR548Q MTNR1A RNU6ATAC39P USP6NL	CAMK1D, MIR4480, MIR548Q	100313841, 100616151, 57118				regulation of granulocyte chemotaxis:CAMK1D | regulation of leukocyte chemotaxis:CAMK1D | positive regulation of chemotaxis:CAMK1D | positive regulation of cell projection organization:CAMK1D | positive regulation of CREB transcription factor activity:CAMK1D | positive regulation of leukocyte chemotaxis:CAMK1D | positive regulation of neuron projection development:CAMK1D | regulation of dendrite …		MIP_1A	6.16912	6.16912	0.0647877		G	C	0.0146613	0.0146613	369	0.947	0	FALSE	-0.163296	1.28063	1.1787
rs6481492:28207393:T:C	FALSE		10	10p12.1	a347	28207393	rs6481492:28207393:T:C	1	TRUE	ARMC4 (0 kb, intron/Intron/MODIFIER); RPL36AP55 (13 kb); MPP7 (130 kb); RN7SKP132 (130 kb)	ARMC4:protein_coding(KNOWN); RPL36AP55:pseudogene(KNOWN); MPP7:protein_coding(KNOWN); RN7SKP132:misc_RNA(KNOWN)	ARMC4: armadillo repeat containing 4 (0 kb)	-0.563271	-0.25954	0.491	0.627781	0.3	0.03	0.01	6	6	Motifs|PWM|GATA-1|	NA	ABI1 | ARMC4 | BAMBI | MASTL | RAB18 | WAC		ABI1 ARMC4 BAMBI MASTL MKX MPP7 RAB18 RN7SKP132 RPL36AP55 WAC	ARMC4, MKX, MPP7, RP11-360I20.2, WAC	101929202, 143098, 283078, 51322, 55130				histone H2B ubiquitination:WAC | histone ubiquitination:WAC | covalent chromatin modification:WAC | regulation of cellular protein catabolic process:WAC | negative regulation of cellular protein catabolic process:WAC | negative regulation of protein catabolic process:WAC | regulation of proteasomal protein catabolic process:WAC | histone modification:WAC | regulation of protein complex assembly:M…		IL_1B	8.5588	8.5588	0.0934139		C	T	0.0567895	0.0567895	361	0.999	0	FALSE	0.0413059	0.705347	0.204216
rs6481493:28208262:C:T	FALSE		10	10p12.1	a347	28208262	rs6481492:28207393:T:C	1	FALSE	ARMC4 (0 kb, intron/Intron/MODIFIER); RPL36AP55 (14 kb); MPP7 (130 kb); RN7SKP132 (140 kb)	ARMC4:protein_coding(KNOWN); RPL36AP55:pseudogene(KNOWN); MPP7:protein_coding(KNOWN); RN7SKP132:misc_RNA(KNOWN)	ARMC4: armadillo repeat containing 4 (0 kb)	-0.349392	-0.221479	1.625	0.244454	0.3	0.13	0.04	7	7		NA	ABI1 | ARMC4 | BAMBI | MASTL | RAB18 | WAC		ABI1 ARMC4 BAMBI MASTL MKX MPP7 RAB18 RN7SKP132 RPL36AP55 WAC	ARMC4, MKX, MPP7, RP11-360I20.2, WAC	101929202, 143098, 283078, 51322, 55130				histone H2B ubiquitination:WAC | histone ubiquitination:WAC | covalent chromatin modification:WAC | regulation of cellular protein catabolic process:WAC | negative regulation of cellular protein catabolic process:WAC | negative regulation of protein catabolic process:WAC | regulation of proteasomal protein catabolic process:WAC | histone modification:WAC | regulation of protein complex assembly:M…		IL_1B	8.55866	8.55866	0.0934128		T	C	0.0567867	0.0567867	361	0.999	0	FALSE	0.0413568	0.705434	0.204325
rs7094524:28208462:T:C	FALSE		10	10p12.1	a347	28208462	rs6481492:28207393:T:C	1	FALSE	ARMC4 (0 kb, intron/Intron/MODIFIER); RPL36AP55 (14 kb); MPP7 (130 kb); RN7SKP132 (140 kb)	ARMC4:protein_coding(KNOWN); RPL36AP55:pseudogene(KNOWN); MPP7:protein_coding(KNOWN); RN7SKP132:misc_RNA(KNOWN)	ARMC4: armadillo repeat containing 4 (0 kb)	-0.604776	-0.255064	0.539	0.475798	0.31	0.05	0.01	6	6	Motifs|PWM|HESX1|	NA	ABI1 | ARMC4 | BAMBI | MASTL | RAB18 | WAC		ABI1 ARMC4 BAMBI MASTL MKX MPP7 RAB18 RN7SKP132 RPL36AP55 WAC	ARMC4, MKX, MPP7, RP11-360I20.2, WAC	101929202, 143098, 283078, 51322, 55130				histone H2B ubiquitination:WAC | histone ubiquitination:WAC | covalent chromatin modification:WAC | regulation of cellular protein catabolic process:WAC | negative regulation of cellular protein catabolic process:WAC | negative regulation of protein catabolic process:WAC | regulation of proteasomal protein catabolic process:WAC | histone modification:WAC | regulation of protein complex assembly:M…		IL_1B	8.55866	8.55866	0.0934128		C	T	0.0567867	0.0567867	361	1	2	FALSE	0.0413568	0.705434	0.204325
rs73604102:28210513:A:G	FALSE		10	10p12.1	a347	28210513	rs6481492:28207393:T:C	1	FALSE	ARMC4 (0 kb, intron/Intron/MODIFIER); RPL36AP55 (16 kb); MPP7 (130 kb); RN7SKP132 (140 kb)	ARMC4:protein_coding(KNOWN); RPL36AP55:pseudogene(KNOWN); MPP7:protein_coding(KNOWN); RN7SKP132:misc_RNA(KNOWN)	ARMC4: armadillo repeat containing 4 (0 kb)	0.053367	-0.167807	2.333	0.639022	0.35	0.07	0	6	6	Motifs|PWM|Oct-1|, Motifs|PWM|Oct-1|, Motifs|PWM|POU3F2|, Motifs|PWM|Oct-1|, Motifs|PWM|Oct-1|, Motifs|PWM|Pou3f3|, Motifs|PWM|Octamer|, Motifs|PWM|Pou3f3|, Motifs|PWM|Octamer|, Motifs|PWM|Pou2f2|, Motifs|PWM|TEF|, Motifs|PWM|POU2F2|, Motifs|PWM|POU3F1|, Motifs|PWM|POU3F2|, Motifs|PWM|POU3F3|	NA	ABI1 | ARMC4 | BAMBI | MASTL | RAB18 | WAC		ABI1 ARMC4 BAMBI MASTL MKX MPP7 RAB18 RN7SKP132 RPL36AP55 WAC	ARMC4, MKX, MPP7, RP11-360I20.2, WAC	101929202, 143098, 283078, 51322, 55130				histone H2B ubiquitination:WAC | histone ubiquitination:WAC | covalent chromatin modification:WAC | regulation of cellular protein catabolic process:WAC | negative regulation of cellular protein catabolic process:WAC | negative regulation of protein catabolic process:WAC | regulation of proteasomal protein catabolic process:WAC | histone modification:WAC | regulation of protein complex assembly:M…		IL_1B	8.55866	8.55866	0.0934128		G	A	0.0567867	0.0567867	361	0.999	0	FALSE	0.0413568	0.705434	0.204325
rs78833558:28211258:AG:A	FALSE		10	10p12.1	a347	28211258	rs6481492:28207393:T:C	1	FALSE	ARMC4 (0 kb); RPL36AP55 (17 kb); MPP7 (130 kb); RN7SKP132 (140 kb)	ARMC4:protein_coding(KNOWN); RPL36AP55:pseudogene(KNOWN); MPP7:protein_coding(KNOWN); RN7SKP132:misc_RNA(KNOWN)	ARMC4: armadillo repeat containing 4 (0 kb)			3.645								NA	ABI1 | ARMC4 | BAMBI | MASTL | RAB18 | WAC		ABI1 ARMC4 BAMBI MASTL MKX MPP7 RAB18 RN7SKP132 RPL36AP55 WAC	ARMC4, MKX, MPP7, RP11-360I20.2, WAC	101929202, 143098, 283078, 51322, 55130				histone H2B ubiquitination:WAC | histone ubiquitination:WAC | covalent chromatin modification:WAC | regulation of cellular protein catabolic process:WAC | negative regulation of cellular protein catabolic process:WAC | negative regulation of protein catabolic process:WAC | regulation of proteasomal protein catabolic process:WAC | histone modification:WAC | regulation of protein complex assembly:M…		IL_1B	8.55866	8.55866	0.0934128		A	AG	0.0567867	0.0567867	361	0.999	0	FALSE	0.0413568	0.705434	0.204325
rs111989495:28211907:TAAG:T	FALSE		10	10p12.1	a347	28211907	rs6481492:28207393:T:C	1	FALSE	ARMC4 (0 kb); RPL36AP55 (18 kb); MPP7 (130 kb); RN7SKP132 (140 kb)	ARMC4:protein_coding(KNOWN); RPL36AP55:pseudogene(KNOWN); MPP7:protein_coding(KNOWN); RN7SKP132:misc_RNA(KNOWN)	ARMC4: armadillo repeat containing 4 (0 kb)			7.733								NA	ABI1 | ARMC4 | BAMBI | MASTL | RAB18 | WAC		ABI1 ARMC4 BAMBI MASTL MKX MPP7 RAB18 RN7SKP132 RPL36AP55 WAC	ARMC4, MKX, MPP7, RP11-360I20.2, WAC	101929202, 143098, 283078, 51322, 55130				histone H2B ubiquitination:WAC | histone ubiquitination:WAC | covalent chromatin modification:WAC | regulation of cellular protein catabolic process:WAC | negative regulation of cellular protein catabolic process:WAC | negative regulation of protein catabolic process:WAC | regulation of proteasomal protein catabolic process:WAC | histone modification:WAC | regulation of protein complex assembly:M…		IL_1B	8.55866	8.55866	0.0934128		T	TAAG	0.0567867	0.0567867	361	0.998	0	FALSE	0.0413568	0.705434	0.204325
rs6481494:28216167:C:T	FALSE		10	10p12.1	a347	28216167	rs6481492:28207393:T:C	1	FALSE	ARMC4 (0 kb, intron/Intron/MODIFIER); RPL36AP55 (22 kb); MPP7 (120 kb); RN7SKP132 (140 kb)	ARMC4:protein_coding(KNOWN); RPL36AP55:pseudogene(KNOWN); MPP7:protein_coding(KNOWN); RN7SKP132:misc_RNA(KNOWN)	ARMC4: armadillo repeat containing 4 (0 kb)	-0.115894	-0.187812	6.498	0.656605	0.18	0.06	0.02	7	7		NA	ABI1 | ARMC4 | BAMBI | MASTL | RAB18 | WAC		ABI1 ARMC4 BAMBI MASTL MKX MPP7 RAB18 RN7SKP132 RPL36AP55 WAC	ARMC4, MKX, MPP7, RP11-360I20.2, WAC	101929202, 143098, 283078, 51322, 55130				histone H2B ubiquitination:WAC | histone ubiquitination:WAC | covalent chromatin modification:WAC | regulation of cellular protein catabolic process:WAC | negative regulation of cellular protein catabolic process:WAC | negative regulation of protein catabolic process:WAC | regulation of proteasomal protein catabolic process:WAC | histone modification:WAC | regulation of protein complex assembly:M…		IL_1B	8.55866	8.55866	0.0934128		T	C	0.0567867	0.0567867	361	0.998	0	FALSE	0.0413568	0.705434	0.204325
rs7073702:28216528:T:C	FALSE		10	10p12.1	a347	28216528	rs6481492:28207393:T:C	1	FALSE	ARMC4 (0 kb, intron/Intron/MODIFIER); RPL36AP55 (22 kb); MPP7 (120 kb); RN7SKP132 (140 kb)	ARMC4:protein_coding(KNOWN); RPL36AP55:pseudogene(KNOWN); MPP7:protein_coding(KNOWN); RN7SKP132:misc_RNA(KNOWN)	ARMC4: armadillo repeat containing 4 (0 kb)	-0.0404778	-0.173859	4.592	0.660877	0.38	0.16	0.05	6	6	Motifs|PWM|AIRE|, Motifs|PWM|PXR=CAR=LXR=FXR|	NA	ABI1 | ARMC4 | BAMBI | MASTL | RAB18 | WAC		ABI1 ARMC4 BAMBI MASTL MKX MPP7 RAB18 RN7SKP132 RPL36AP55 WAC	ARMC4, MKX, MPP7, RP11-360I20.2, WAC	101929202, 143098, 283078, 51322, 55130				histone H2B ubiquitination:WAC | histone ubiquitination:WAC | covalent chromatin modification:WAC | regulation of cellular protein catabolic process:WAC | negative regulation of cellular protein catabolic process:WAC | negative regulation of protein catabolic process:WAC | regulation of proteasomal protein catabolic process:WAC | histone modification:WAC | regulation of protein complex assembly:M…		IL_1B	8.55866	8.55866	0.0934128		C	T	0.0567867	0.0567867	361	0.998	0	FALSE	0.0413568	0.705434	0.204325
rs60695807:28218010:C:T	FALSE		10	10p12.1	a347	28218010	rs6481492:28207393:T:C	1	FALSE	ARMC4 (0 kb, intron/Intron/MODIFIER); RPL36AP55 (24 kb); MPP7 (120 kb); RN7SKP132 (150 kb)	ARMC4:protein_coding(KNOWN); RPL36AP55:pseudogene(KNOWN); MPP7:protein_coding(KNOWN); RN7SKP132:misc_RNA(KNOWN)	ARMC4: armadillo repeat containing 4 (0 kb)	-0.248472	-0.203746	2.577	0.562092	0.37	0.08	0.03	6	6	Motifs|PWM|IRF7|, Chromatin_Structure|FAIRE|Mcf7|Hypoxlac, Chromatin_Structure|FAIRE|Medullo|	NA	ABI1 | ARMC4 | BAMBI | MASTL | RAB18 | WAC		ABI1 ARMC4 BAMBI MASTL MKX MPP7 RAB18 RN7SKP132 RPL36AP55 WAC	ARMC4, MKX, MPP7, RP11-360I20.2, WAC	101929202, 143098, 283078, 51322, 55130				histone H2B ubiquitination:WAC | histone ubiquitination:WAC | covalent chromatin modification:WAC | regulation of cellular protein catabolic process:WAC | negative regulation of cellular protein catabolic process:WAC | negative regulation of protein catabolic process:WAC | regulation of proteasomal protein catabolic process:WAC | histone modification:WAC | regulation of protein complex assembly:M…		IL_1B	8.55866	8.55866	0.0934128		T	C	0.0567867	0.0567867	361	0.998	0	FALSE	0.0413568	0.705434	0.204325
rs60695014:28219631:T:C	FALSE		10	10p12.1	a347	28219631	rs6481492:28207393:T:C	1	FALSE	ARMC4 (0 kb, intron/Intron/MODIFIER); RPL36AP55 (26 kb); MPP7 (120 kb); RN7SKP132 (150 kb)	ARMC4:protein_coding(KNOWN); RPL36AP55:pseudogene(KNOWN); MPP7:protein_coding(KNOWN); RN7SKP132:misc_RNA(KNOWN)	ARMC4: armadillo repeat containing 4 (0 kb)	0.124944	-0.154252	6.187	0.853173	0.21	0.08	0.06	6	6	Motifs|PWM|Sox13|, Motifs|PWM|Sox5|, Motifs|PWM|Sox7|, Motifs|PWM|Sry|	NA	ABI1 | ARMC4 | BAMBI | MASTL | RAB18 | WAC		ABI1 ARMC4 BAMBI MASTL MKX MPP7 RAB18 RN7SKP132 RPL36AP55 WAC	ARMC4, MKX, MPP7, RP11-360I20.2, WAC	101929202, 143098, 283078, 51322, 55130				histone H2B ubiquitination:WAC | histone ubiquitination:WAC | covalent chromatin modification:WAC | regulation of cellular protein catabolic process:WAC | negative regulation of cellular protein catabolic process:WAC | negative regulation of protein catabolic process:WAC | regulation of proteasomal protein catabolic process:WAC | histone modification:WAC | regulation of protein complex assembly:M…		IL_1B	8.55866	8.55866	0.0934128		C	T	0.0567867	0.0567867	361	0.998	0	FALSE	0.0413568	0.705434	0.204325
rs59329138:28219737:C:A	FALSE		10	10p12.1	a347	28219737	rs6481492:28207393:T:C	1	FALSE	ARMC4 (0 kb, intron/Intron/MODIFIER); RPL36AP55 (26 kb); MPP7 (120 kb); RN7SKP132 (150 kb)	ARMC4:protein_coding(KNOWN); RPL36AP55:pseudogene(KNOWN); MPP7:protein_coding(KNOWN); RN7SKP132:misc_RNA(KNOWN)	ARMC4: armadillo repeat containing 4 (0 kb)	-0.0965104	-0.190745	4.199	0.464339	0.29	0.13	0.06	7	7		NA	ABI1 | ARMC4 | BAMBI | MASTL | RAB18 | WAC		ABI1 ARMC4 BAMBI MASTL MKX MPP7 RAB18 RN7SKP132 RPL36AP55 WAC	ARMC4, MKX, MPP7, RP11-360I20.2, WAC	101929202, 143098, 283078, 51322, 55130				histone H2B ubiquitination:WAC | histone ubiquitination:WAC | covalent chromatin modification:WAC | regulation of cellular protein catabolic process:WAC | negative regulation of cellular protein catabolic process:WAC | negative regulation of protein catabolic process:WAC | regulation of proteasomal protein catabolic process:WAC | histone modification:WAC | regulation of protein complex assembly:M…		IL_1B	8.55866	8.55866	0.0934128		A	C	0.0567867	0.0567867	361	0.998	0	FALSE	0.0413568	0.705434	0.204325
rs58716372:28219764:T:C	FALSE		10	10p12.1	a347	28219764	rs6481492:28207393:T:C	1	FALSE	ARMC4 (0 kb, intron/Intron/MODIFIER); RPL36AP55 (26 kb); MPP7 (120 kb); RN7SKP132 (150 kb)	ARMC4:protein_coding(KNOWN); RPL36AP55:pseudogene(KNOWN); MPP7:protein_coding(KNOWN); RN7SKP132:misc_RNA(KNOWN)	ARMC4: armadillo repeat containing 4 (0 kb)	0.0803636	-0.154516	5.274	0.652619	0.29	0.18	0.09	6	6	Motifs|PWM|AR|, Motifs|PWM|AR|	NA	ABI1 | ARMC4 | BAMBI | MASTL | RAB18 | WAC		ABI1 ARMC4 BAMBI MASTL MKX MPP7 RAB18 RN7SKP132 RPL36AP55 WAC	ARMC4, MKX, MPP7, RP11-360I20.2, WAC	101929202, 143098, 283078, 51322, 55130				histone H2B ubiquitination:WAC | histone ubiquitination:WAC | covalent chromatin modification:WAC | regulation of cellular protein catabolic process:WAC | negative regulation of cellular protein catabolic process:WAC | negative regulation of protein catabolic process:WAC | regulation of proteasomal protein catabolic process:WAC | histone modification:WAC | regulation of protein complex assembly:M…		IL_1B	8.55866	8.55866	0.0934128		C	T	0.0567867	0.0567867	361	0.998	0	FALSE	0.0413568	0.705434	0.204325
rs73606005:28220375:T:A	FALSE		10	10p12.1	a347	28220375	rs6481492:28207393:T:C	1	FALSE	ARMC4 (0 kb, intron/Intron/MODIFIER); RPL36AP55 (26 kb); MPP7 (120 kb); RN7SKP132 (150 kb)	ARMC4:protein_coding(KNOWN); RPL36AP55:pseudogene(KNOWN); MPP7:protein_coding(KNOWN); RN7SKP132:misc_RNA(KNOWN)	ARMC4: armadillo repeat containing 4 (0 kb)	0.0467177	-0.158884	5.277	0.621624	0.24	0.1	0.05	7	7		NA	ABI1 | ARMC4 | BAMBI | MASTL | RAB18 | WAC		ABI1 ARMC4 BAMBI MASTL MKX MPP7 RAB18 RN7SKP132 RPL36AP55 WAC	ARMC4, MKX, MPP7, RP11-360I20.2, WAC	101929202, 143098, 283078, 51322, 55130				histone H2B ubiquitination:WAC | histone ubiquitination:WAC | covalent chromatin modification:WAC | regulation of cellular protein catabolic process:WAC | negative regulation of cellular protein catabolic process:WAC | negative regulation of protein catabolic process:WAC | regulation of proteasomal protein catabolic process:WAC | histone modification:WAC | regulation of protein complex assembly:M…		IL_1B	8.55866	8.55866	0.0934128		A	T	0.0567867	0.0567867	361	0.998	0	FALSE	0.0413568	0.705434	0.204325
rs73606007:28220754:C:T	FALSE		10	10p12.1	a347	28220754	rs6481492:28207393:T:C	1	FALSE	ARMC4 (0 kb, intron/Intron/MODIFIER); RPL36AP55 (27 kb); MPP7 (120 kb); RN7SKP132 (150 kb)	ARMC4:protein_coding(KNOWN); RPL36AP55:pseudogene(KNOWN); MPP7:protein_coding(KNOWN); RN7SKP132:misc_RNA(KNOWN)	ARMC4: armadillo repeat containing 4 (0 kb)	-0.163841	-0.192803	5.797	0.652796	0.2	0.24	0.04	7	7		NA	ABI1 | ARMC4 | BAMBI | MASTL | RAB18 | WAC		ABI1 ARMC4 BAMBI MASTL MKX MPP7 RAB18 RN7SKP132 RPL36AP55 WAC	ARMC4, MKX, MPP7, RP11-360I20.2, WAC	101929202, 143098, 283078, 51322, 55130				histone H2B ubiquitination:WAC | histone ubiquitination:WAC | covalent chromatin modification:WAC | regulation of cellular protein catabolic process:WAC | negative regulation of cellular protein catabolic process:WAC | negative regulation of protein catabolic process:WAC | regulation of proteasomal protein catabolic process:WAC | histone modification:WAC | regulation of protein complex assembly:M…		IL_1B	8.55866	8.55866	0.0934128		T	C	0.0567867	0.0567867	361	0.998	0	FALSE	0.0413568	0.705434	0.204325
rs73606008:28220929:C:G	FALSE		10	10p12.1	a347	28220929	rs6481492:28207393:T:C	1	FALSE	ARMC4 (0 kb, intron/Intron/MODIFIER); RPL36AP55 (27 kb); MPP7 (120 kb); RN7SKP132 (150 kb)	ARMC4:protein_coding(KNOWN); RPL36AP55:pseudogene(KNOWN); MPP7:protein_coding(KNOWN); RN7SKP132:misc_RNA(KNOWN)	ARMC4: armadillo repeat containing 4 (0 kb)	-0.166913	-0.187088	5.552	0.785153	0.27	0.03	0.03	6	6	Motifs|PWM|Isgf3g|	NA	ABI1 | ARMC4 | BAMBI | MASTL | RAB18 | WAC		ABI1 ARMC4 BAMBI MASTL MKX MPP7 RAB18 RN7SKP132 RPL36AP55 WAC	ARMC4, MKX, MPP7, RP11-360I20.2, WAC	101929202, 143098, 283078, 51322, 55130				histone H2B ubiquitination:WAC | histone ubiquitination:WAC | covalent chromatin modification:WAC | regulation of cellular protein catabolic process:WAC | negative regulation of cellular protein catabolic process:WAC | negative regulation of protein catabolic process:WAC | regulation of proteasomal protein catabolic process:WAC | histone modification:WAC | regulation of protein complex assembly:M…		IL_1B	8.55866	8.55866	0.0934128		G	C	0.0567867	0.0567867	361	0.998	0	FALSE	0.0413568	0.705434	0.204325
rs61049661:28222111:T:C	FALSE		10	10p12.1	a347	28222111	rs6481492:28207393:T:C	1	FALSE	ARMC4 (0 kb, intron/Intron/MODIFIER); RPL36AP55 (28 kb); MPP7 (120 kb); RN7SKP132 (150 kb)	ARMC4:protein_coding(KNOWN); RPL36AP55:pseudogene(KNOWN); MPP7:protein_coding(KNOWN); RN7SKP132:misc_RNA(KNOWN)	ARMC4: armadillo repeat containing 4 (0 kb)	-0.0793672	-0.108613	8.122	0.833842	0.4	0.03	0	5	5	Protein_Binding|ChIP-seq|CEBPB|HepG2|, Protein_Binding|ChIP-seq|CEBPB|IMR90|	NA	ABI1 | ARMC4 | BAMBI | MASTL | RAB18 | WAC		ABI1 ARMC4 BAMBI MASTL MKX MPP7 RAB18 RN7SKP132 RPL36AP55 WAC	ARMC4, MKX, MPP7, RP11-360I20.2, WAC	101929202, 143098, 283078, 51322, 55130				histone H2B ubiquitination:WAC | histone ubiquitination:WAC | covalent chromatin modification:WAC | regulation of cellular protein catabolic process:WAC | negative regulation of cellular protein catabolic process:WAC | negative regulation of protein catabolic process:WAC | regulation of proteasomal protein catabolic process:WAC | histone modification:WAC | regulation of protein complex assembly:M…		IL_1B	8.55866	8.55866	0.0934128		C	T	0.0567867	0.0567867	361	0.999	0	FALSE	0.0413568	0.705434	0.204325
rs7908757:28222621:A:G	FALSE		10	10p12.1	a347	28222621	rs6481492:28207393:T:C	1	FALSE	ARMC4 (0 kb, intron/Intron/MODIFIER); RPL36AP55 (29 kb); MPP7 (120 kb); RN7SKP132 (150 kb)	ARMC4:protein_coding(KNOWN); RPL36AP55:pseudogene(KNOWN); MPP7:protein_coding(KNOWN); RN7SKP132:misc_RNA(KNOWN)	ARMC4: armadillo repeat containing 4 (0 kb)	-0.0857852	-0.179168	12.12	0.8763	0.42	0.12	0.07	7	7		NA	ABI1 | ARMC4 | BAMBI | MASTL | RAB18 | WAC		ABI1 ARMC4 BAMBI MASTL MKX MPP7 RAB18 RN7SKP132 RPL36AP55 WAC	ARMC4, MKX, MPP7, RP11-360I20.2, WAC	101929202, 143098, 283078, 51322, 55130				histone H2B ubiquitination:WAC | histone ubiquitination:WAC | covalent chromatin modification:WAC | regulation of cellular protein catabolic process:WAC | negative regulation of cellular protein catabolic process:WAC | negative regulation of protein catabolic process:WAC | regulation of proteasomal protein catabolic process:WAC | histone modification:WAC | regulation of protein complex assembly:M…		IL_1B	8.55866	8.55866	0.0934128		G	A	0.0567867	0.0567867	361	0.999	0	FALSE	0.0413568	0.705434	0.204325
rs57483828:28225259:T:C	FALSE		10	10p12.1	a347	28225259	rs6481492:28207393:T:C	1	FALSE	ARMC4 (0 kb, intron/Intron/MODIFIER); RPL36AP55 (31 kb); MPP7 (110 kb); RN7SKP132 (150 kb)	ARMC4:protein_coding(KNOWN); RPL36AP55:pseudogene(KNOWN); MPP7:protein_coding(KNOWN); RN7SKP132:misc_RNA(KNOWN)	ARMC4: armadillo repeat containing 4 (0 kb)	-0.105139	-0.188665	1.676	0.652712	0.26	0.15	0.07	7	7	Chromatin_Structure|FAIRE|Medullo|	NA	ABI1 | ARMC4 | BAMBI | MASTL | RAB18 | WAC		ABI1 ARMC4 BAMBI MASTL MKX MPP7 RAB18 RN7SKP132 RPL36AP55 WAC	ARMC4, MKX, MPP7, RP11-360I20.2, WAC	101929202, 143098, 283078, 51322, 55130				histone H2B ubiquitination:WAC | histone ubiquitination:WAC | covalent chromatin modification:WAC | regulation of cellular protein catabolic process:WAC | negative regulation of cellular protein catabolic process:WAC | negative regulation of protein catabolic process:WAC | regulation of proteasomal protein catabolic process:WAC | histone modification:WAC | regulation of protein complex assembly:M…		IL_1B	8.55866	8.55866	0.0934128		C	T	0.0567867	0.0567867	361	0.999	0	FALSE	0.0413568	0.705434	0.204325
rs59247264:28203665:T:C	FALSE		10	10p12.1	a347	28203665	rs6481492:28207393:T:C	0.999999	FALSE	ARMC4 (0 kb, intron/Intron/MODIFIER); RPL36AP55 (9.6 kb); RN7SKP132 (130 kb); MPP7 (140 kb)	ARMC4:protein_coding(KNOWN); RPL36AP55:pseudogene(KNOWN); RN7SKP132:misc_RNA(KNOWN); MPP7:protein_coding(KNOWN)	ARMC4: armadillo repeat containing 4 (0 kb)	-0.37162	-0.23674	0.675	0.466251	0.19	0.06	0.05	6	6	Motifs|PWM|Oct-1|, Motifs|PWM|POU6F1|, Motifs|PWM|Octamer|	NA	ABI1 | ARMC4 | BAMBI | MASTL | RAB18 | WAC		ABI1 ARMC4 BAMBI MASTL MKX MPP7 RAB18 RN7SKP132 RPL36AP55 WAC	ARMC4, MKX, MPP7, RP11-360I20.2, WAC	101929202, 143098, 283078, 51322, 55130				histone H2B ubiquitination:WAC | histone ubiquitination:WAC | covalent chromatin modification:WAC | regulation of cellular protein catabolic process:WAC | negative regulation of cellular protein catabolic process:WAC | negative regulation of protein catabolic process:WAC | regulation of proteasomal protein catabolic process:WAC | histone modification:WAC | regulation of protein complex assembly:M…		IL_1B	8.5586	8.5586	0.0934121		C	T	0.0568019	0.0568019	361	0.997	0	FALSE	0.0411441	0.705121	0.203963
rs56922968:28205443:TA:T	FALSE		10	10p12.1	a347	28205443	rs6481492:28207393:T:C	1	FALSE	ARMC4 (0 kb); RPL36AP55 (11 kb); RN7SKP132 (130 kb); MPP7 (130 kb)	ARMC4:protein_coding(KNOWN); RPL36AP55:pseudogene(KNOWN); RN7SKP132:misc_RNA(KNOWN); MPP7:protein_coding(KNOWN)	ARMC4: armadillo repeat containing 4 (0 kb)			4.756								NA	ABI1 | ARMC4 | BAMBI | MASTL | RAB18 | WAC		ABI1 ARMC4 BAMBI MASTL MKX MPP7 RAB18 RN7SKP132 RPL36AP55 WAC	ARMC4, MKX, MPP7, RP11-360I20.2, WAC	101929202, 143098, 283078, 51322, 55130				histone H2B ubiquitination:WAC | histone ubiquitination:WAC | covalent chromatin modification:WAC | regulation of cellular protein catabolic process:WAC | negative regulation of cellular protein catabolic process:WAC | negative regulation of protein catabolic process:WAC | regulation of proteasomal protein catabolic process:WAC | histone modification:WAC | regulation of protein complex assembly:M…		IL_1B	8.55854	8.55854	0.0934108		T	TA	0.0567964	0.0567964	361	0.998	0	FALSE	0.0412277	0.70525	0.204117
rs61456649:28203828:G:A	FALSE		10	10p12.1	a347	28203828	rs6481492:28207393:T:C	0.999999	FALSE	ARMC4 (0 kb, intron/Intron/MODIFIER); RPL36AP55 (9.7 kb); RN7SKP132 (130 kb); MPP7 (140 kb)	ARMC4:protein_coding(KNOWN); RPL36AP55:pseudogene(KNOWN); RN7SKP132:misc_RNA(KNOWN); MPP7:protein_coding(KNOWN)	ARMC4: armadillo repeat containing 4 (0 kb)	-0.230751	-0.202151	3.181	0.504923	0.22	0.02	0.01	6	6	Motifs|Footprinting|PTF1-beta|Cll, Motifs|PWM|Nr2f2|, Motifs|PWM|Rara|, Motifs|PWM|T3R|, Motifs|PWM|PTF1-beta|, Motifs|PWM|RARA|, Motifs|PWM|RARB|	NA	ABI1 | ARMC4 | BAMBI | MASTL | RAB18 | WAC		ABI1 ARMC4 BAMBI MASTL MKX MPP7 RAB18 RN7SKP132 RPL36AP55 WAC	ARMC4, MKX, MPP7, RP11-360I20.2, WAC	101929202, 143098, 283078, 51322, 55130				histone H2B ubiquitination:WAC | histone ubiquitination:WAC | covalent chromatin modification:WAC | regulation of cellular protein catabolic process:WAC | negative regulation of cellular protein catabolic process:WAC | negative regulation of protein catabolic process:WAC | regulation of proteasomal protein catabolic process:WAC | histone modification:WAC | regulation of protein complex assembly:M…		IL_1B	8.55853	8.55853	0.0934108		A	G	0.0568006	0.0568006	361	0.997	0	FALSE	0.0411688	0.705163	0.204015
rs7907231:28204536:C:T	FALSE		10	10p12.1	a347	28204536	rs6481492:28207393:T:C	0.999951	FALSE	ARMC4 (0 kb, intron/Intron/MODIFIER); RPL36AP55 (10 kb); RN7SKP132 (130 kb); MPP7 (140 kb)	ARMC4:protein_coding(KNOWN); RPL36AP55:pseudogene(KNOWN); RN7SKP132:misc_RNA(KNOWN); MPP7:protein_coding(KNOWN)	ARMC4: armadillo repeat containing 4 (0 kb)	-0.546075	-0.247176	0.619	0.394198	0.26	0.01	0.03	6	6	Motifs|PWM|MSX1|	NA	ABI1 | ARMC4 | BAMBI | MASTL | RAB18 | WAC		ABI1 ARMC4 BAMBI MASTL MKX MPP7 RAB18 RN7SKP132 RPL36AP55 WAC	ARMC4, MKX, MPP7, RP11-360I20.2, WAC	101929202, 143098, 283078, 51322, 55130				histone H2B ubiquitination:WAC | histone ubiquitination:WAC | covalent chromatin modification:WAC | regulation of cellular protein catabolic process:WAC | negative regulation of cellular protein catabolic process:WAC | negative regulation of protein catabolic process:WAC | regulation of proteasomal protein catabolic process:WAC | histone modification:WAC | regulation of protein complex assembly:M…		IL_1B	8.54622	8.54622	0.0932723		T	C	0.0568905	0.0568905	361	0.993	0	FALSE	0.0409239	0.702907	0.201537
rs201152921:28210664:CAA:C	FALSE		10	10p12.1	a347	28210664	rs6481492:28207393:T:C	0.972269	FALSE	ARMC4 (0 kb); RPL36AP55 (17 kb); MPP7 (130 kb); RN7SKP132 (140 kb)	ARMC4:protein_coding(KNOWN); RPL36AP55:pseudogene(KNOWN); MPP7:protein_coding(KNOWN); RN7SKP132:misc_RNA(KNOWN)	ARMC4: armadillo repeat containing 4 (0 kb)											NA	ABI1 | ARMC4 | BAMBI | MASTL | RAB18 | WAC		ABI1 ARMC4 BAMBI MASTL MKX MPP7 RAB18 RN7SKP132 RPL36AP55 WAC	ARMC4, MKX, MPP7, RP11-360I20.2, WAC	101929202, 143098, 283078, 51322, 55130				histone H2B ubiquitination:WAC | histone ubiquitination:WAC | covalent chromatin modification:WAC | regulation of cellular protein catabolic process:WAC | negative regulation of cellular protein catabolic process:WAC | negative regulation of protein catabolic process:WAC | regulation of proteasomal protein catabolic process:WAC | histone modification:WAC | regulation of protein complex assembly:M…		IL_1B	8.51321	8.51321	0.0928996		C	CAA	0.0593448	0.0593448	361	0.986	0	FALSE	0.0450565	0.667091	0.211351
rs7896625:28241898:G:A	FALSE		10	10p12.1	a347	28241898	rs6481492:28207393:T:C	0.976823	FALSE	ARMC4 (0 kb, intron/Intron/MODIFIER | nc-RNA/Non coding transcript/MODIFIER | near_gene/Downstream gene/MODIFIER); RPL36AP55 (48 kb); MPP7 (98 kb); RN7SKP132 (170 kb)	ARMC4:protein_coding(KNOWN); RPL36AP55:pseudogene(KNOWN); MPP7:protein_coding(KNOWN); RN7SKP132:misc_RNA(KNOWN)	ARMC4: armadillo repeat containing 4 (0 kb)	-0.71347	-0.279125	0.6	0.468413	0.27	0.07	0.05	6	6	Motifs|PWM|Sox8|	NA	ABI1 | ARMC4 | BAMBI | MASTL | RAB18 | WAC		ABI1 ARMC4 BAMBI MASTL MKX MPP7 RAB18 RN7SKP132 RPL36AP55 WAC	ARMC4, MKX, MPP7, RP11-360I20.2, WAC	101929202, 143098, 283078, 51322, 55130				histone H2B ubiquitination:WAC | histone ubiquitination:WAC | covalent chromatin modification:WAC | regulation of cellular protein catabolic process:WAC | negative regulation of cellular protein catabolic process:WAC | negative regulation of protein catabolic process:WAC | regulation of proteasomal protein catabolic process:WAC | histone modification:WAC | regulation of protein complex assembly:M…		IL_1B	8.22589	8.22589	0.0896516		A	G	0.0581717	0.0581717	361	0.999	0	FALSE	0.0486513	0.783027	0.276092
rs4367844:28244079:C:T	FALSE		10	10p12.1	a347	28244079	rs6481492:28207393:T:C	0.976823	FALSE	ARMC4 (0 kb, intron/Intron/MODIFIER | nc-RNA/Non coding transcript/MODIFIER | near_gene/Downstream gene/MODIFIER); RPL36AP55 (50 kb); MPP7 (96 kb); RN7SKP132 (170 kb)	ARMC4:protein_coding(KNOWN); RPL36AP55:pseudogene(KNOWN); MPP7:protein_coding(KNOWN); RN7SKP132:misc_RNA(KNOWN)	ARMC4: armadillo repeat containing 4 (0 kb)	0.0449731	-0.160409	1.218	0.836824	0.22	0.2	0.07	7	7		NA	ABI1 | ARMC4 | BAMBI | MASTL | RAB18 | WAC		ABI1 ARMC4 BAMBI MASTL MKX MPP7 RAB18 RN7SKP132 RPL36AP55 WAC	ARMC4, MKX, MPP7, RP11-360I20.2, WAC	101929202, 143098, 283078, 51322, 55130				histone H2B ubiquitination:WAC | histone ubiquitination:WAC | covalent chromatin modification:WAC | regulation of cellular protein catabolic process:WAC | negative regulation of cellular protein catabolic process:WAC | negative regulation of protein catabolic process:WAC | regulation of proteasomal protein catabolic process:WAC | histone modification:WAC | regulation of protein complex assembly:M…		IL_1B	8.22589	8.22589	0.0896516		T	C	0.0581717	0.0581717	361	0.999	0	FALSE	0.0486513	0.783027	0.276092
rs11815183:28244268:C:T	FALSE		10	10p12.1	a347	28244268	rs6481492:28207393:T:C	0.97682	FALSE	ARMC4 (0 kb, intron/Intron/MODIFIER | nc-RNA/Non coding transcript/MODIFIER | near_gene/Downstream gene/MODIFIER); RPL36AP55 (50 kb); MPP7 (96 kb); RN7SKP132 (170 kb)	ARMC4:protein_coding(KNOWN); RPL36AP55:pseudogene(KNOWN); MPP7:protein_coding(KNOWN); RN7SKP132:misc_RNA(KNOWN)	ARMC4: armadillo repeat containing 4 (0 kb)	0.0664358	-0.159398	1.613	0.477885	0.29	0.23	0.07	7	7		NA	ABI1 | ARMC4 | BAMBI | MASTL | RAB18 | WAC		ABI1 ARMC4 BAMBI MASTL MKX MPP7 RAB18 RN7SKP132 RPL36AP55 WAC	ARMC4, MKX, MPP7, RP11-360I20.2, WAC	101929202, 143098, 283078, 51322, 55130				histone H2B ubiquitination:WAC | histone ubiquitination:WAC | covalent chromatin modification:WAC | regulation of cellular protein catabolic process:WAC | negative regulation of cellular protein catabolic process:WAC | negative regulation of protein catabolic process:WAC | regulation of proteasomal protein catabolic process:WAC | histone modification:WAC | regulation of protein complex assembly:M…		IL_1B	8.22206	8.22206	0.0896086		T	C	0.0581883	0.0581883	361	0.999	0	FALSE	0.0485945	0.784158	0.276702
rs7922435:28246344:C:T	FALSE		10	10p12.1	a347	28246344	rs6481492:28207393:T:C	0.976782	FALSE	ARMC4 (0 kb, 3'utr/3 prime UTR/MODIFIER | intron/Intron/MODIFIER | nc-RNA/Non coding transcript/MODIFIER); RPL36AP55 (52 kb); MPP7 (94 kb); RN7SKP132 (170 kb)	ARMC4:protein_coding(KNOWN); RPL36AP55:pseudogene(KNOWN); MPP7:protein_coding(KNOWN); RN7SKP132:misc_RNA(KNOWN)	ARMC4: armadillo repeat containing 4 (0 kb)	0.221544	-0.128184	4.332	0.517722	0.43	0.74	0.73	5	5	Chromatin_Structure|DNase-seq|Huh7|	NA	ABI1 | ARMC4 | BAMBI | MASTL | RAB18 | WAC		ABI1 ARMC4 BAMBI MASTL MKX MPP7 RAB18 RN7SKP132 RPL36AP55 WAC	ARMC4, MKX, MPP7, RP11-360I20.2, WAC	101929202, 143098, 283078, 51322, 55130				histone H2B ubiquitination:WAC | histone ubiquitination:WAC | covalent chromatin modification:WAC | regulation of cellular protein catabolic process:WAC | negative regulation of cellular protein catabolic process:WAC | negative regulation of protein catabolic process:WAC | regulation of proteasomal protein catabolic process:WAC | histone modification:WAC | regulation of protein complex assembly:M…		IL_1B	8.21419	8.21419	0.0895196		T	C	0.0582618	0.0582618	361	0.997	0	FALSE	0.0497858	0.783618	0.276004
rs201715058:28240556:T:TA	FALSE		10	10p12.1	a347	28240556	rs6481492:28207393:T:C	0.856994	FALSE	ARMC4 (0 kb, intron/Intron/MODIFIER | nc-RNA/Non coding transcript/MODIFIER); RPL36AP55 (46 kb); MPP7 (99 kb); RN7SKP132 (170 kb)	ARMC4:protein_coding(KNOWN); RPL36AP55:pseudogene(KNOWN); MPP7:protein_coding(KNOWN); RN7SKP132:misc_RNA(KNOWN)	ARMC4: armadillo repeat containing 4 (0 kb)								6	6	Motifs|PWM|Tcfap2e|, Motifs|PWM|Mtf1|, Motifs|PWM|Elf3|, Motifs|PWM|Srf|, Motifs|PWM|Zfp105|, Motifs|PWM|Srf|, Motifs|PWM|Srf|	NA	ABI1 | ARMC4 | BAMBI | MASTL | RAB18 | WAC		ABI1 ARMC4 BAMBI MASTL MKX MPP7 RAB18 RN7SKP132 RPL36AP55 WAC	ARMC4, MKX, MPP7, RP11-360I20.2, WAC	101929202, 143098, 283078, 51322, 55130				histone H2B ubiquitination:WAC | histone ubiquitination:WAC | covalent chromatin modification:WAC | regulation of cellular protein catabolic process:WAC | negative regulation of cellular protein catabolic process:WAC | negative regulation of protein catabolic process:WAC | regulation of proteasomal protein catabolic process:WAC | histone modification:WAC | regulation of protein complex assembly:M…		IL_1B	7.98979	7.98979	0.0869776		TA	T	0.0555207	0.0555207	361	0.973	0	FALSE	0.0644502	0.753605	0.218729
rs7071570:28214488:C:T	FALSE		10	10p12.1	a347	28214488	rs6481492:28207393:T:C	0.976397	FALSE	ARMC4 (0 kb, intron/Intron/MODIFIER); RPL36AP55 (20 kb); MPP7 (130 kb); RN7SKP132 (140 kb)	ARMC4:protein_coding(KNOWN); RPL36AP55:pseudogene(KNOWN); MPP7:protein_coding(KNOWN); RN7SKP132:misc_RNA(KNOWN)	ARMC4: armadillo repeat containing 4 (0 kb)	-0.590459	-0.245615	5.075	0.655696	0.33	0.03	0	7	7		NA	ABI1 | ARMC4 | BAMBI | MASTL | RAB18 | WAC		ABI1 ARMC4 BAMBI MASTL MKX MPP7 RAB18 RN7SKP132 RPL36AP55 WAC	ARMC4, MKX, MPP7, RP11-360I20.2, WAC	101929202, 143098, 283078, 51322, 55130				histone H2B ubiquitination:WAC | histone ubiquitination:WAC | covalent chromatin modification:WAC | regulation of cellular protein catabolic process:WAC | negative regulation of cellular protein catabolic process:WAC | negative regulation of protein catabolic process:WAC | regulation of proteasomal protein catabolic process:WAC | histone modification:WAC | regulation of protein complex assembly:M…		IL_1B	7.93499	7.93499	0.0863561		T	C	0.0554017	0.0554017	361	0.997	0	FALSE	0.0192093	0.691227	0.181754
rs6481496:28235153:C:A	FALSE		10	10p12.1	a347	28235153	rs6481492:28207393:T:C	0.953219	FALSE	ARMC4 (0 kb, intron/Intron/MODIFIER | nc-RNA/Non coding transcript/MODIFIER); RPL36AP55 (41 kb); MPP7 (100 kb); RN7SKP132 (160 kb)	ARMC4:protein_coding(KNOWN); RPL36AP55:pseudogene(KNOWN); MPP7:protein_coding(KNOWN); RN7SKP132:misc_RNA(KNOWN)	ARMC4: armadillo repeat containing 4 (0 kb)	-0.8573	-0.296872	0.337	0.0958693	0.31	0.11	0.06	6	6	Motifs|PWM|FOXP1|, Motifs|PWM|FOXP1|	NA	ABI1 | ARMC4 | BAMBI | MASTL | RAB18 | WAC		ABI1 ARMC4 BAMBI MASTL MKX MPP7 RAB18 RN7SKP132 RPL36AP55 WAC	ARMC4, MKX, MPP7, RP11-360I20.2, WAC	101929202, 143098, 283078, 51322, 55130				histone H2B ubiquitination:WAC | histone ubiquitination:WAC | covalent chromatin modification:WAC | regulation of cellular protein catabolic process:WAC | negative regulation of cellular protein catabolic process:WAC | negative regulation of protein catabolic process:WAC | regulation of proteasomal protein catabolic process:WAC | histone modification:WAC | regulation of protein complex assembly:M…		IL_1B	7.6172	7.6172	0.0827443		A	C	0.0567867	0.0567867	361	0.997	0	FALSE	0.0270425	0.770422	0.255228
rs144080867:28127690:A:AT	FALSE		10	10p12.1	a347	28127690	rs144080867:28127690:A:AT	1	TRUE	ARMC4 (0 kb, intron/Intron/MODIFIER | near_gene/Upstream gene/MODIFIER); RN7SKP132 (55 kb); RPL36AP55 (65 kb); MKX (93 kb)	ARMC4:protein_coding(KNOWN); RN7SKP132:misc_RNA(KNOWN); RPL36AP55:pseudogene(KNOWN); MKX:protein_coding(KNOWN)	ARMC4: armadillo repeat containing 4 (0 kb)			11.04					6	6		NA	ABI1 | ARMC4 | BAMBI | MASTL | RAB18 | WAC		ABI1 ARMC4 BAMBI MASTL MKX MPP7 RAB18 RN7SKP132 RPL36AP55 WAC	ARMC4, MKX, MPP7, RP11-360I20.2, WAC	101929202, 143098, 283078, 51322, 55130				histone H2B ubiquitination:WAC | histone ubiquitination:WAC | covalent chromatin modification:WAC | regulation of cellular protein catabolic process:WAC | negative regulation of cellular protein catabolic process:WAC | negative regulation of protein catabolic process:WAC | regulation of proteasomal protein catabolic process:WAC | histone modification:WAC | regulation of protein complex assembly:M…		IL_1B	7.33135	7.33135	0.0794882		AT	A	0.0485138	0.0485138	361	0.99	0	FALSE	-0.0379263	0.601268	0.201438
rs77841606:28129387:A:C	FALSE		10	10p12.1	a347	28129387	rs144080867:28127690:A:AT	0.999969	FALSE	ARMC4 (0 kb, intron/Intron/MODIFIER | near_gene/Upstream gene/MODIFIER); RN7SKP132 (56 kb); RPL36AP55 (64 kb); MKX (94 kb)	ARMC4:protein_coding(KNOWN); RN7SKP132:misc_RNA(KNOWN); RPL36AP55:pseudogene(KNOWN); MKX:protein_coding(KNOWN)	ARMC4: armadillo repeat containing 4 (0 kb)	0.319069	0.0172441	2.111	0.338085	0.44	0.24	0.13	4	4	Chromatin_Structure|DNase-seq|K562G1phase|, Chromatin_Structure|DNase-seq|K562|, Chromatin_Structure|DNase-seq|K562G2mphase|, Chromatin_Structure|DNase-seq|Mcf7|Ctcfshrna, Chromatin_Structure|DNase-seq|Mcf7|, Chromatin_Structure|DNase-seq|H7es|, Chromatin_Structure|DNase-seq|Nt2d1|, Protein_Binding|ChIP-seq|USF1|H1-hESC|, Protein_Binding|ChIP-seq|USF1|K562|, Protein_Binding|ChIP-seq|YY1|H1-hESC|,…	NA	ABI1 | ARMC4 | BAMBI | MASTL | RAB18 | WAC		ABI1 ARMC4 BAMBI MASTL MKX MPP7 RAB18 RN7SKP132 RPL36AP55 WAC	ARMC4, MKX, MPP7, RP11-360I20.2, WAC	101929202, 143098, 283078, 51322, 55130				histone H2B ubiquitination:WAC | histone ubiquitination:WAC | covalent chromatin modification:WAC | regulation of cellular protein catabolic process:WAC | negative regulation of cellular protein catabolic process:WAC | negative regulation of protein catabolic process:WAC | regulation of proteasomal protein catabolic process:WAC | histone modification:WAC | regulation of protein complex assembly:M…		IL_1B	7.33014	7.33014	0.079475		C	A	0.0485126	0.0485126	361	0.99	0	FALSE	-0.0370423	0.601433	0.201874
rs117840923:28132540:G:C	FALSE		10	10p12.1	a347	28132540	rs144080867:28127690:A:AT	0.999934	FALSE	ARMC4 (0 kb, intron/Intron/MODIFIER); RN7SKP132 (60 kb); RPL36AP55 (61 kb); MKX (98 kb)	ARMC4:protein_coding(KNOWN); RN7SKP132:misc_RNA(KNOWN); RPL36AP55:pseudogene(KNOWN); MKX:protein_coding(KNOWN)	ARMC4: armadillo repeat containing 4 (0 kb)	-0.568342	-0.250826	0.04	0.504305	0.21	0.03	0	6	6	Motifs|PWM|MEF-2|, Motifs|PWM|MEF-2|, Motifs|PWM|MEF-2|, Motifs|PWM|RSRFC4|, Motifs|PWM|RSRFC4|, Motifs|PWM|MEF2A|, Motifs|PWM|MEF-2|, Motifs|PWM|MEF2D|, Motifs|PWM|MEF2B|, Motifs|PWM|MEF2A|	NA	ABI1 | ARMC4 | BAMBI | MASTL | RAB18 | WAC		ABI1 ARMC4 BAMBI MASTL MKX MPP7 RAB18 RN7SKP132 RPL36AP55 WAC	ARMC4, MKX, MPP7, RP11-360I20.2, WAC	101929202, 143098, 283078, 51322, 55130				histone H2B ubiquitination:WAC | histone ubiquitination:WAC | covalent chromatin modification:WAC | regulation of cellular protein catabolic process:WAC | negative regulation of cellular protein catabolic process:WAC | negative regulation of protein catabolic process:WAC | regulation of proteasomal protein catabolic process:WAC | histone modification:WAC | regulation of protein complex assembly:M…		IL_1B	7.32985	7.32985	0.0794714		C	G	0.0485111	0.0485111	361	0.99	0	FALSE	-0.0366324	0.601521	0.202068
rs57657796:28132915:G:A	FALSE		10	10p12.1	a347	28132915	rs144080867:28127690:A:AT	0.999931	FALSE	ARMC4 (0 kb, intron/Intron/MODIFIER); RN7SKP132 (60 kb); RPL36AP55 (60 kb); MKX (98 kb)	ARMC4:protein_coding(KNOWN); RN7SKP132:misc_RNA(KNOWN); RPL36AP55:pseudogene(KNOWN); MKX:protein_coding(KNOWN)	ARMC4: armadillo repeat containing 4 (0 kb)	-0.30971	-0.21347	2.697	0.59959	0.21	0.05	0.02	7	7		NA	ABI1 | ARMC4 | BAMBI | MASTL | RAB18 | WAC		ABI1 ARMC4 BAMBI MASTL MKX MPP7 RAB18 RN7SKP132 RPL36AP55 WAC	ARMC4, MKX, MPP7, RP11-360I20.2, WAC	101929202, 143098, 283078, 51322, 55130				histone H2B ubiquitination:WAC | histone ubiquitination:WAC | covalent chromatin modification:WAC | regulation of cellular protein catabolic process:WAC | negative regulation of cellular protein catabolic process:WAC | negative regulation of protein catabolic process:WAC | regulation of proteasomal protein catabolic process:WAC | histone modification:WAC | regulation of protein complex assembly:M…		IL_1B	7.32975	7.32975	0.0794708		A	G	0.048511	0.048511	361	0.99	0	FALSE	-0.0366046	0.601541	0.202094
rs116858785:28135827:T:C	FALSE		10	10p12.1	a347	28135827	rs144080867:28127690:A:AT	0.999919	FALSE	ARMC4 (0 kb, intron/Intron/MODIFIER); RPL36AP55 (57 kb); RN7SKP132 (63 kb); MKX (100 kb)	ARMC4:protein_coding(KNOWN); RPL36AP55:pseudogene(KNOWN); RN7SKP132:misc_RNA(KNOWN); MKX:protein_coding(KNOWN)	ARMC4: armadillo repeat containing 4 (0 kb)	-0.809368	-0.287673	0.945	0.284629	0.2	0.12	0	6	6		NA	ABI1 | ARMC4 | BAMBI | MASTL | RAB18 | WAC		ABI1 ARMC4 BAMBI MASTL MKX MPP7 RAB18 RN7SKP132 RPL36AP55 WAC	ARMC4, MKX, MPP7, RP11-360I20.2, WAC	101929202, 143098, 283078, 51322, 55130				histone H2B ubiquitination:WAC | histone ubiquitination:WAC | covalent chromatin modification:WAC | regulation of cellular protein catabolic process:WAC | negative regulation of cellular protein catabolic process:WAC | negative regulation of protein catabolic process:WAC | regulation of proteasomal protein catabolic process:WAC | histone modification:WAC | regulation of protein complex assembly:M…		IL_1B	7.32919	7.32919	0.0794636		C	T	0.0485126	0.0485126	361	0.99	0	FALSE	-0.0365102	0.601511	0.202092
rs75685482:28138636:G:A	FALSE		10	10p12.1	a347	28138636	rs144080867:28127690:A:AT	0.999919	FALSE	ARMC4 (0 kb, intron/Intron/MODIFIER); RPL36AP55 (55 kb); RN7SKP132 (66 kb); MKX (100 kb)	ARMC4:protein_coding(KNOWN); RPL36AP55:pseudogene(KNOWN); RN7SKP132:misc_RNA(KNOWN); MKX:protein_coding(KNOWN)	ARMC4: armadillo repeat containing 4 (0 kb)	0.178998	-0.143428	6.544	0.630709	0.33	0.18	0.1	7	7		NA	ABI1 | ARMC4 | BAMBI | MASTL | RAB18 | WAC		ABI1 ARMC4 BAMBI MASTL MKX MPP7 RAB18 RN7SKP132 RPL36AP55 WAC	ARMC4, MKX, MPP7, RP11-360I20.2, WAC	101929202, 143098, 283078, 51322, 55130				histone H2B ubiquitination:WAC | histone ubiquitination:WAC | covalent chromatin modification:WAC | regulation of cellular protein catabolic process:WAC | negative regulation of cellular protein catabolic process:WAC | negative regulation of protein catabolic process:WAC | regulation of proteasomal protein catabolic process:WAC | histone modification:WAC | regulation of protein complex assembly:M…		IL_1B	7.32916	7.32916	0.0794631		A	G	0.0485153	0.0485153	361	0.99	0	FALSE	-0.0365019	0.601536	0.202063
rs74493657:28139661:A:G	FALSE		10	10p12.1	a347	28139661	rs144080867:28127690:A:AT	0.999919	FALSE	ARMC4 (0 kb, intron/Intron/MODIFIER); RPL36AP55 (53 kb); RN7SKP132 (67 kb); MKX (100 kb)	ARMC4:protein_coding(KNOWN); RPL36AP55:pseudogene(KNOWN); RN7SKP132:misc_RNA(KNOWN); MKX:protein_coding(KNOWN)	ARMC4: armadillo repeat containing 4 (0 kb)	0.186492	-0.136693	13.2	0.916577	0.23	0.07	0.02	6	6	Motifs|PWM|Dbx1|, Motifs|PWM|HeliosA|, Motifs|PWM|Tcfap2e|, Motifs|PWM|NFAT5|	NA	ABI1 | ARMC4 | BAMBI | MASTL | RAB18 | WAC		ABI1 ARMC4 BAMBI MASTL MKX MPP7 RAB18 RN7SKP132 RPL36AP55 WAC	ARMC4, MKX, MPP7, RP11-360I20.2, WAC	101929202, 143098, 283078, 51322, 55130				histone H2B ubiquitination:WAC | histone ubiquitination:WAC | covalent chromatin modification:WAC | regulation of cellular protein catabolic process:WAC | negative regulation of cellular protein catabolic process:WAC | negative regulation of protein catabolic process:WAC | regulation of proteasomal protein catabolic process:WAC | histone modification:WAC | regulation of protein complex assembly:M…		IL_1B	7.32916	7.32916	0.0794631		G	A	0.0485153	0.0485153	361	0.99	0	FALSE	-0.0365019	0.601536	0.202063
rs78922577:28139764:T:C	FALSE		10	10p12.1	a347	28139764	rs144080867:28127690:A:AT	0.999918	FALSE	ARMC4 (0 kb, intron/Intron/MODIFIER); RPL36AP55 (53 kb); RN7SKP132 (67 kb); MKX (100 kb)	ARMC4:protein_coding(KNOWN); RPL36AP55:pseudogene(KNOWN); RN7SKP132:misc_RNA(KNOWN); MKX:protein_coding(KNOWN)	ARMC4: armadillo repeat containing 4 (0 kb)	-0.825473	-0.287767	0.074	0.391709	0.34	0.3	0.09	7	7		NA	ABI1 | ARMC4 | BAMBI | MASTL | RAB18 | WAC		ABI1 ARMC4 BAMBI MASTL MKX MPP7 RAB18 RN7SKP132 RPL36AP55 WAC	ARMC4, MKX, MPP7, RP11-360I20.2, WAC	101929202, 143098, 283078, 51322, 55130				histone H2B ubiquitination:WAC | histone ubiquitination:WAC | covalent chromatin modification:WAC | regulation of cellular protein catabolic process:WAC | negative regulation of cellular protein catabolic process:WAC | negative regulation of protein catabolic process:WAC | regulation of proteasomal protein catabolic process:WAC | histone modification:WAC | regulation of protein complex assembly:M…		IL_1B	7.32916	7.32916	0.0794631		C	T	0.0485153	0.0485153	361	0.99	0	FALSE	-0.0365059	0.601539	0.202063
rs3831254:28145200:AT:A	FALSE		10	10p12.1	a347	28145200	rs144080867:28127690:A:AT	0.99992	FALSE	ARMC4 (0 kb); RPL36AP55 (48 kb); RN7SKP132 (72 kb); MKX (110 kb)	ARMC4:protein_coding(KNOWN); RPL36AP55:pseudogene(KNOWN); RN7SKP132:misc_RNA(KNOWN); MKX:protein_coding(KNOWN)	ARMC4: armadillo repeat containing 4 (0 kb)			1.353								NA	ABI1 | ARMC4 | BAMBI | MASTL | RAB18 | WAC		ABI1 ARMC4 BAMBI MASTL MKX MPP7 RAB18 RN7SKP132 RPL36AP55 WAC	ARMC4, MKX, MPP7, RP11-360I20.2, WAC	101929202, 143098, 283078, 51322, 55130				histone H2B ubiquitination:WAC | histone ubiquitination:WAC | covalent chromatin modification:WAC | regulation of cellular protein catabolic process:WAC | negative regulation of cellular protein catabolic process:WAC | negative regulation of protein catabolic process:WAC | regulation of proteasomal protein catabolic process:WAC | histone modification:WAC | regulation of protein complex assembly:M…		IL_1B	7.32887	7.32887	0.0794606		A	AT	0.0485195	0.0485195	361	0.989	0	FALSE	-0.0365277	0.601509	0.201959
rs146400187:28138329:C:T	FALSE		10	10p12.1	a347	28138329	rs144080867:28127690:A:AT	0.999918	FALSE	ARMC4 (0 kb, intron/Intron/MODIFIER); RPL36AP55 (55 kb); RN7SKP132 (65 kb); MKX (100 kb)	ARMC4:protein_coding(KNOWN); RPL36AP55:pseudogene(KNOWN); RN7SKP132:misc_RNA(KNOWN); MKX:protein_coding(KNOWN)	ARMC4: armadillo repeat containing 4 (0 kb)	-0.143028	-0.188961	10.3	0.962421	0.23	0.03	0.01	6	6		NA	ABI1 | ARMC4 | BAMBI | MASTL | RAB18 | WAC		ABI1 ARMC4 BAMBI MASTL MKX MPP7 RAB18 RN7SKP132 RPL36AP55 WAC	ARMC4, MKX, MPP7, RP11-360I20.2, WAC	101929202, 143098, 283078, 51322, 55130				histone H2B ubiquitination:WAC | histone ubiquitination:WAC | covalent chromatin modification:WAC | regulation of cellular protein catabolic process:WAC | negative regulation of cellular protein catabolic process:WAC | negative regulation of protein catabolic process:WAC | regulation of proteasomal protein catabolic process:WAC | histone modification:WAC | regulation of protein complex assembly:M…		IL_1B	7.32718	7.32718	0.0794411		T	C	0.0485236	0.0485236	361	0.988	0	FALSE	-0.036523	0.601055	0.202063
rs199821545:28207837:TA:T	FALSE		10	10p12.1	a347	28207837	rs6481492:28207393:T:C	0.891377	FALSE	ARMC4 (0 kb); RPL36AP55 (14 kb); MPP7 (130 kb); RN7SKP132 (130 kb)	ARMC4:protein_coding(KNOWN); RPL36AP55:pseudogene(KNOWN); MPP7:protein_coding(KNOWN); RN7SKP132:misc_RNA(KNOWN)	ARMC4: armadillo repeat containing 4 (0 kb)											NA	ABI1 | ARMC4 | BAMBI | MASTL | RAB18 | WAC		ABI1 ARMC4 BAMBI MASTL MKX MPP7 RAB18 RN7SKP132 RPL36AP55 WAC	ARMC4, MKX, MPP7, RP11-360I20.2, WAC	101929202, 143098, 283078, 51322, 55130				histone H2B ubiquitination:WAC | histone ubiquitination:WAC | covalent chromatin modification:WAC | regulation of cellular protein catabolic process:WAC | negative regulation of cellular protein catabolic process:WAC | negative regulation of protein catabolic process:WAC | regulation of proteasomal protein catabolic process:WAC | histone modification:WAC | regulation of protein complex assembly:M…		IL_1B	7.25471	7.25471	0.0786142		T	TA	0.0675929	0.0675929	361	0.948	0	FALSE	0.0606169	0.65428	0.223215
rs77033139:28238619:G:C	FALSE		10	10p12.1	a347	28238619	rs6481492:28207393:T:C	0.883046	FALSE	ARMC4 (0 kb, intron/Intron/MODIFIER | nc-RNA/Non coding transcript/MODIFIER); RPL36AP55 (45 kb); MPP7 (100 kb); RN7SKP132 (170 kb)	ARMC4:protein_coding(KNOWN); RPL36AP55:pseudogene(KNOWN); MPP7:protein_coding(KNOWN); RN7SKP132:misc_RNA(KNOWN)	ARMC4: armadillo repeat containing 4 (0 kb)	0.0419085	-0.0878206	0.538	0.664852	0.2	0.2	0.17	4	4	Chromatin_Structure|DNase-seq|Htr8|, Protein_Binding|ChIP-seq|JUND|HepG2|	NA	ABI1 | ARMC4 | BAMBI | MASTL | RAB18 | WAC		ABI1 ARMC4 BAMBI MASTL MKX MPP7 RAB18 RN7SKP132 RPL36AP55 WAC	ARMC4, MKX, MPP7, RP11-360I20.2, WAC	101929202, 143098, 283078, 51322, 55130				histone H2B ubiquitination:WAC | histone ubiquitination:WAC | covalent chromatin modification:WAC | regulation of cellular protein catabolic process:WAC | negative regulation of cellular protein catabolic process:WAC | negative regulation of protein catabolic process:WAC | regulation of proteasomal protein catabolic process:WAC | histone modification:WAC | regulation of protein complex assembly:M…		IL_1B	7.08619	7.08619	0.0766898		C	G	0.0540401	0.0540401	361	0.997	0	FALSE	0.0420926	0.7618	0.252358
rs75593214:28248524:G:A	FALSE		10	10p12.1	a347	28248524	rs6481492:28207393:T:C	0.883061	FALSE	ARMC4 (0 kb, intron/Intron/MODIFIER | nc-RNA/Non coding transcript/MODIFIER); RPL36AP55 (54 kb); MPP7 (91 kb); RN7SKP132 (180 kb)	ARMC4:protein_coding(KNOWN); RPL36AP55:pseudogene(KNOWN); MPP7:protein_coding(KNOWN); RN7SKP132:misc_RNA(KNOWN)	ARMC4: armadillo repeat containing 4 (0 kb)	-0.0427527	-0.163659	4.337	0.71534	0.17	0.27	0.15	5	5	Chromatin_Structure|DNase-seq|Myometr|, Chromatin_Structure|DNase-seq|Nha|, Chromatin_Structure|DNase-seq|Nhlf|, Chromatin_Structure|DNase-seq|Ag10803|, Chromatin_Structure|DNase-seq|Hs27a|	NA	ABI1 | ARMC4 | BAMBI | MASTL | RAB18 | WAC		ABI1 ARMC4 BAMBI MASTL MKX MPP7 RAB18 RN7SKP132 RPL36AP55 WAC	ARMC4, MKX, MPP7, RP11-360I20.2, WAC	101929202, 143098, 283078, 51322, 55130				histone H2B ubiquitination:WAC | histone ubiquitination:WAC | covalent chromatin modification:WAC | regulation of cellular protein catabolic process:WAC | negative regulation of cellular protein catabolic process:WAC | negative regulation of protein catabolic process:WAC | regulation of proteasomal protein catabolic process:WAC | histone modification:WAC | regulation of protein complex assembly:M…		IL_1B	7.03534	7.03534	0.0761086		A	G	0.0541258	0.0541258	361	0.989	0	FALSE	0.0439914	0.760726	0.25048
rs140322529:28228323:CTGTCTATGA:C	TRUE		10	10p12.1	a347	28228323	rs6481492:28207393:T:C	0.884049	FALSE	ARMC4 (0 kb, intron/Intron/MODIFIER); RPL36AP55 (34 kb); MPP7 (110 kb); RN7SKP132 (160 kb)	ARMC4:protein_coding(KNOWN); RPL36AP55:pseudogene(KNOWN); MPP7:protein_coding(KNOWN); RN7SKP132:misc_RNA(KNOWN)	ARMC4: armadillo repeat containing 4 (0 kb)			4.565								NA	ABI1 | ARMC4 | BAMBI | MASTL | RAB18 | WAC		ABI1 ARMC4 BAMBI MASTL MKX MPP7 RAB18 RN7SKP132 RPL36AP55 WAC	ARMC4, MKX, MPP7, RP11-360I20.2, WAC	101929202, 143098, 283078, 51322, 55130				histone H2B ubiquitination:WAC | histone ubiquitination:WAC | covalent chromatin modification:WAC | regulation of cellular protein catabolic process:WAC | negative regulation of cellular protein catabolic process:WAC | negative regulation of protein catabolic process:WAC | regulation of proteasomal protein catabolic process:WAC | histone modification:WAC | regulation of protein complex assembly:M…		IL_1B	6.80574	6.80574	0.073482		C	CTGTCTATGA	0.0512465	0.0512465	361	0.997	0	FALSE	0.00789282	0.656779	0.14348
rs41283706:28233732:C:G	FALSE		10	10p12.1	a347	28233732	rs6481492:28207393:T:C	0.884082	FALSE	ARMC4 (0 kb, intron/Intron/MODIFIER | near_gene/Downstream gene/MODIFIER); RPL36AP55 (40 kb); MPP7 (110 kb); RN7SKP132 (160 kb)	ARMC4:protein_coding(KNOWN); RPL36AP55:pseudogene(KNOWN); MPP7:protein_coding(KNOWN); RN7SKP132:misc_RNA(KNOWN)	ARMC4: armadillo repeat containing 4 (0 kb)	-0.11184	-0.195574	1.826	0.385136	0.48	0.5	0.38	6	6	Motifs|PWM|ZID|	NA	ABI1 | ARMC4 | BAMBI | MASTL | RAB18 | WAC		ABI1 ARMC4 BAMBI MASTL MKX MPP7 RAB18 RN7SKP132 RPL36AP55 WAC	ARMC4, MKX, MPP7, RP11-360I20.2, WAC	101929202, 143098, 283078, 51322, 55130				histone H2B ubiquitination:WAC | histone ubiquitination:WAC | covalent chromatin modification:WAC | regulation of cellular protein catabolic process:WAC | negative regulation of cellular protein catabolic process:WAC | negative regulation of protein catabolic process:WAC | regulation of proteasomal protein catabolic process:WAC | histone modification:WAC | regulation of protein complex assembly:M…		IL_1B	6.8033	6.8033	0.0734546		G	C	0.0512687	0.0512687	361	0.997	0	FALSE	0.00823281	0.656893	0.143929
rs983258:28228017:A:G	FALSE		10	10p12.1	a347	28228017	rs6481492:28207393:T:C	0.884036	FALSE	ARMC4 (0 kb, intron/Intron/MODIFIER); RPL36AP55 (34 kb); MPP7 (110 kb); RN7SKP132 (160 kb)	ARMC4:protein_coding(KNOWN); RPL36AP55:pseudogene(KNOWN); MPP7:protein_coding(KNOWN); RN7SKP132:misc_RNA(KNOWN)	ARMC4: armadillo repeat containing 4 (0 kb)	-0.0109141	-0.180723	4.499	0.599222	0.25	0.09	0.06	4	4	Chromatin_Structure|DNase-seq|Lncap|, Protein_Binding|ChIP-seq|AR|VCaP|	NA	ABI1 | ARMC4 | BAMBI | MASTL | RAB18 | WAC		ABI1 ARMC4 BAMBI MASTL MKX MPP7 RAB18 RN7SKP132 RPL36AP55 WAC	ARMC4, MKX, MPP7, RP11-360I20.2, WAC	101929202, 143098, 283078, 51322, 55130				histone H2B ubiquitination:WAC | histone ubiquitination:WAC | covalent chromatin modification:WAC | regulation of cellular protein catabolic process:WAC | negative regulation of cellular protein catabolic process:WAC | negative regulation of protein catabolic process:WAC | regulation of proteasomal protein catabolic process:WAC | histone modification:WAC | regulation of protein complex assembly:M…		IL_1B	6.80253	6.80253	0.0734452		G	A	0.0512673	0.0512673	361	0.998	0	FALSE	0.00822092	0.656836	0.143924
rs75394736:28211933:A:G	FALSE		10	10p12.1	a347	28211933	rs6481492:28207393:T:C	0.88399	FALSE	ARMC4 (0 kb, intron/Intron/MODIFIER); RPL36AP55 (18 kb); MPP7 (130 kb); RN7SKP132 (140 kb)	ARMC4:protein_coding(KNOWN); RPL36AP55:pseudogene(KNOWN); MPP7:protein_coding(KNOWN); RN7SKP132:misc_RNA(KNOWN)	ARMC4: armadillo repeat containing 4 (0 kb)	-0.167708	-0.196469	2.057	0.743808	0.33	0.04	0	6	6	Motifs|PWM|NF-AT|, Motifs|PWM|POU6F1|	NA	ABI1 | ARMC4 | BAMBI | MASTL | RAB18 | WAC		ABI1 ARMC4 BAMBI MASTL MKX MPP7 RAB18 RN7SKP132 RPL36AP55 WAC	ARMC4, MKX, MPP7, RP11-360I20.2, WAC	101929202, 143098, 283078, 51322, 55130				histone H2B ubiquitination:WAC | histone ubiquitination:WAC | covalent chromatin modification:WAC | regulation of cellular protein catabolic process:WAC | negative regulation of cellular protein catabolic process:WAC | negative regulation of protein catabolic process:WAC | regulation of proteasomal protein catabolic process:WAC | histone modification:WAC | regulation of protein complex assembly:M…		IL_1B	6.80177	6.80177	0.0734367		G	A	0.051266	0.051266	361	0.997	0	FALSE	0.00820902	0.656779	0.143919
rs78900698:28214858:C:T	FALSE		10	10p12.1	a347	28214858	rs6481492:28207393:T:C	0.88399	FALSE	ARMC4 (0 kb, intron/Intron/MODIFIER); RPL36AP55 (21 kb); MPP7 (130 kb); RN7SKP132 (140 kb)	ARMC4:protein_coding(KNOWN); RPL36AP55:pseudogene(KNOWN); MPP7:protein_coding(KNOWN); RN7SKP132:misc_RNA(KNOWN)	ARMC4: armadillo repeat containing 4 (0 kb)	-0.47182	-0.235073	0.902	0.374403	0.31	0.02	0	7	7		NA	ABI1 | ARMC4 | BAMBI | MASTL | RAB18 | WAC		ABI1 ARMC4 BAMBI MASTL MKX MPP7 RAB18 RN7SKP132 RPL36AP55 WAC	ARMC4, MKX, MPP7, RP11-360I20.2, WAC	101929202, 143098, 283078, 51322, 55130				histone H2B ubiquitination:WAC | histone ubiquitination:WAC | covalent chromatin modification:WAC | regulation of cellular protein catabolic process:WAC | negative regulation of cellular protein catabolic process:WAC | negative regulation of protein catabolic process:WAC | regulation of proteasomal protein catabolic process:WAC | histone modification:WAC | regulation of protein complex assembly:M…		IL_1B	6.80177	6.80177	0.0734367		T	C	0.051266	0.051266	361	0.997	0	FALSE	0.00820902	0.656779	0.143919
rs78953108:28217748:A:C	FALSE		10	10p12.1	a347	28217748	rs6481492:28207393:T:C	0.88399	FALSE	ARMC4 (0 kb, intron/Intron/MODIFIER); RPL36AP55 (24 kb); MPP7 (120 kb); RN7SKP132 (140 kb)	ARMC4:protein_coding(KNOWN); RPL36AP55:pseudogene(KNOWN); MPP7:protein_coding(KNOWN); RN7SKP132:misc_RNA(KNOWN)	ARMC4: armadillo repeat containing 4 (0 kb)	0.0354734	-0.163601	1.288	0.64326	0.28	0.03	0.01	7	7		NA	ABI1 | ARMC4 | BAMBI | MASTL | RAB18 | WAC		ABI1 ARMC4 BAMBI MASTL MKX MPP7 RAB18 RN7SKP132 RPL36AP55 WAC	ARMC4, MKX, MPP7, RP11-360I20.2, WAC	101929202, 143098, 283078, 51322, 55130				histone H2B ubiquitination:WAC | histone ubiquitination:WAC | covalent chromatin modification:WAC | regulation of cellular protein catabolic process:WAC | negative regulation of cellular protein catabolic process:WAC | negative regulation of protein catabolic process:WAC | regulation of proteasomal protein catabolic process:WAC | histone modification:WAC | regulation of protein complex assembly:M…		IL_1B	6.80177	6.80177	0.0734367		C	A	0.051266	0.051266	361	0.997	0	FALSE	0.00820902	0.656779	0.143919
rs80332328:28218044:G:C	FALSE		10	10p12.1	a347	28218044	rs6481492:28207393:T:C	0.88399	FALSE	ARMC4 (0 kb, intron/Intron/MODIFIER); RPL36AP55 (24 kb); MPP7 (120 kb); RN7SKP132 (150 kb)	ARMC4:protein_coding(KNOWN); RPL36AP55:pseudogene(KNOWN); MPP7:protein_coding(KNOWN); RN7SKP132:misc_RNA(KNOWN)	ARMC4: armadillo repeat containing 4 (0 kb)	-0.196162	-0.201163	0.344	0.516492	0.31	0.06	0.02	7	7	Chromatin_Structure|FAIRE|Mcf7|Hypoxlac	NA	ABI1 | ARMC4 | BAMBI | MASTL | RAB18 | WAC		ABI1 ARMC4 BAMBI MASTL MKX MPP7 RAB18 RN7SKP132 RPL36AP55 WAC	ARMC4, MKX, MPP7, RP11-360I20.2, WAC	101929202, 143098, 283078, 51322, 55130				histone H2B ubiquitination:WAC | histone ubiquitination:WAC | covalent chromatin modification:WAC | regulation of cellular protein catabolic process:WAC | negative regulation of cellular protein catabolic process:WAC | negative regulation of protein catabolic process:WAC | regulation of proteasomal protein catabolic process:WAC | histone modification:WAC | regulation of protein complex assembly:M…		IL_1B	6.80177	6.80177	0.0734367		C	G	0.051266	0.051266	361	0.997	0	FALSE	0.00820902	0.656779	0.143919
rs79338047:28220606:A:T	FALSE		10	10p12.1	a347	28220606	rs6481492:28207393:T:C	0.88399	FALSE	ARMC4 (0 kb, intron/Intron/MODIFIER); RPL36AP55 (27 kb); MPP7 (120 kb); RN7SKP132 (150 kb)	ARMC4:protein_coding(KNOWN); RPL36AP55:pseudogene(KNOWN); MPP7:protein_coding(KNOWN); RN7SKP132:misc_RNA(KNOWN)	ARMC4: armadillo repeat containing 4 (0 kb)	0.191715	-0.146488	1.97	0.193766	0.18	0.07	0.03	6	6	Motifs|PWM|MEF2A|	NA	ABI1 | ARMC4 | BAMBI | MASTL | RAB18 | WAC		ABI1 ARMC4 BAMBI MASTL MKX MPP7 RAB18 RN7SKP132 RPL36AP55 WAC	ARMC4, MKX, MPP7, RP11-360I20.2, WAC	101929202, 143098, 283078, 51322, 55130				histone H2B ubiquitination:WAC | histone ubiquitination:WAC | covalent chromatin modification:WAC | regulation of cellular protein catabolic process:WAC | negative regulation of cellular protein catabolic process:WAC | negative regulation of protein catabolic process:WAC | regulation of proteasomal protein catabolic process:WAC | histone modification:WAC | regulation of protein complex assembly:M…		IL_1B	6.80177	6.80177	0.0734367		T	A	0.051266	0.051266	361	0.998	0	FALSE	0.00820902	0.656779	0.143919
rs78265374:28206745:G:A	FALSE		10	10p12.1	a347	28206745	rs6481492:28207393:T:C	0.883942	FALSE	ARMC4 (0 kb, intron/Intron/MODIFIER); RPL36AP55 (13 kb); MPP7 (130 kb); RN7SKP132 (130 kb)	ARMC4:protein_coding(KNOWN); RPL36AP55:pseudogene(KNOWN); MPP7:protein_coding(KNOWN); RN7SKP132:misc_RNA(KNOWN)	ARMC4: armadillo repeat containing 4 (0 kb)	-0.310689	-0.222587	2.598	0.470955	0.25	0.04	0	7	7		NA	ABI1 | ARMC4 | BAMBI | MASTL | RAB18 | WAC		ABI1 ARMC4 BAMBI MASTL MKX MPP7 RAB18 RN7SKP132 RPL36AP55 WAC	ARMC4, MKX, MPP7, RP11-360I20.2, WAC	101929202, 143098, 283078, 51322, 55130				histone H2B ubiquitination:WAC | histone ubiquitination:WAC | covalent chromatin modification:WAC | regulation of cellular protein catabolic process:WAC | negative regulation of cellular protein catabolic process:WAC | negative regulation of protein catabolic process:WAC | regulation of proteasomal protein catabolic process:WAC | histone modification:WAC | regulation of protein complex assembly:M…		IL_1B	6.80096	6.80096	0.073428		A	G	0.0512687	0.0512687	361	0.997	0	FALSE	0.00812616	0.656612	0.14379
rs117895105:28226968:G:A	FALSE		10	10p12.1	a347	28226968	rs6481492:28207393:T:C	0.884005	FALSE	ARMC4 (0 kb, intron/Intron/MODIFIER); RPL36AP55 (33 kb); MPP7 (110 kb); RN7SKP132 (150 kb)	ARMC4:protein_coding(KNOWN); RPL36AP55:pseudogene(KNOWN); MPP7:protein_coding(KNOWN); RN7SKP132:misc_RNA(KNOWN)	ARMC4: armadillo repeat containing 4 (0 kb)	-0.31465	-0.214533	2.246	0.666131	0.42	0.06	0.03	7	7		NA	ABI1 | ARMC4 | BAMBI | MASTL | RAB18 | WAC		ABI1 ARMC4 BAMBI MASTL MKX MPP7 RAB18 RN7SKP132 RPL36AP55 WAC	ARMC4, MKX, MPP7, RP11-360I20.2, WAC	101929202, 143098, 283078, 51322, 55130				histone H2B ubiquitination:WAC | histone ubiquitination:WAC | covalent chromatin modification:WAC | regulation of cellular protein catabolic process:WAC | negative regulation of cellular protein catabolic process:WAC | negative regulation of protein catabolic process:WAC | regulation of proteasomal protein catabolic process:WAC | histone modification:WAC | regulation of protein complex assembly:M…		IL_1B	6.79724	6.79724	0.0733847		A	G	0.0513103	0.0513103	361	0.997	0	FALSE	0.00825859	0.655933	0.143652
rs144911734:28188599:C:T	FALSE		10	10p12.1	a347	28188599	rs6481492:28207393:T:C	0.860816	FALSE	ARMC4 (0 kb, intron/Intron/MODIFIER); RPL36AP55 (4.5 kb, near_gene/Upstream gene/MODIFIER); RN7SKP132 (120 kb); MPP7 (150 kb)	ARMC4:protein_coding(KNOWN); RPL36AP55:pseudogene(KNOWN); RN7SKP132:misc_RNA(KNOWN); MPP7:protein_coding(KNOWN)	ARMC4: armadillo repeat containing 4 (0 kb)	-0.446209	-0.0224463	3.453	0.846261	0.4	0.37	0.33	3a	3		NA	ABI1 | ARMC4 | BAMBI | MASTL | RAB18 | WAC		ABI1 ARMC4 BAMBI MASTL MKX MPP7 RAB18 RN7SKP132 RPL36AP55 WAC	ARMC4, MKX, MPP7, RP11-360I20.2, WAC	101929202, 143098, 283078, 51322, 55130				histone H2B ubiquitination:WAC | histone ubiquitination:WAC | covalent chromatin modification:WAC | regulation of cellular protein catabolic process:WAC | negative regulation of cellular protein catabolic process:WAC | negative regulation of protein catabolic process:WAC | regulation of proteasomal protein catabolic process:WAC | histone modification:WAC | regulation of protein complex assembly:M…		IL_1B	6.77196	6.77196	0.0730958		T	C	0.0498517	0.0498517	361	0.992	0	FALSE	-0.00879353	0.656724	0.113561
rs79288310:28169426:T:C	FALSE		10	10p12.1	a347	28169426	rs6481492:28207393:T:C	0.860248	FALSE	ARMC4 (0 kb, intron/Intron/MODIFIER); RPL36AP55 (24 kb); RN7SKP132 (96 kb); MKX (130 kb)	ARMC4:protein_coding(KNOWN); RPL36AP55:pseudogene(KNOWN); RN7SKP132:misc_RNA(KNOWN); MKX:protein_coding(KNOWN)	ARMC4: armadillo repeat containing 4 (0 kb)	-0.238228	-0.205646	1.162	0.534723	0.38	0.17	0.1	6	6	Motifs|PWM|HFH1(FOXQ1)|, Motifs|PWM|FOXD3|, Motifs|PWM|Foxd3|	NA	ABI1 | ARMC4 | BAMBI | MASTL | RAB18 | WAC		ABI1 ARMC4 BAMBI MASTL MKX MPP7 RAB18 RN7SKP132 RPL36AP55 WAC	ARMC4, MKX, MPP7, RP11-360I20.2, WAC	101929202, 143098, 283078, 51322, 55130				histone H2B ubiquitination:WAC | histone ubiquitination:WAC | covalent chromatin modification:WAC | regulation of cellular protein catabolic process:WAC | negative regulation of cellular protein catabolic process:WAC | negative regulation of protein catabolic process:WAC | regulation of proteasomal protein catabolic process:WAC | histone modification:WAC | regulation of protein complex assembly:M…		IL_1B	6.75402	6.75402	0.07289		C	T	0.0498726	0.0498726	361	0.995	0	FALSE	-0.00925657	0.654818	0.113342
rs141508372:28166417:CT:C	FALSE		10	10p12.1	a347	28166417	rs6481492:28207393:T:C	0.860289	FALSE	ARMC4 (0 kb, intron/Intron/MODIFIER); RPL36AP55 (27 kb); RN7SKP132 (93 kb); MKX (130 kb)	ARMC4:protein_coding(KNOWN); RPL36AP55:pseudogene(KNOWN); RN7SKP132:misc_RNA(KNOWN); MKX:protein_coding(KNOWN)	ARMC4: armadillo repeat containing 4 (0 kb)			3.592								NA	ABI1 | ARMC4 | BAMBI | MASTL | RAB18 | WAC		ABI1 ARMC4 BAMBI MASTL MKX MPP7 RAB18 RN7SKP132 RPL36AP55 WAC	ARMC4, MKX, MPP7, RP11-360I20.2, WAC	101929202, 143098, 283078, 51322, 55130				histone H2B ubiquitination:WAC | histone ubiquitination:WAC | covalent chromatin modification:WAC | regulation of cellular protein catabolic process:WAC | negative regulation of cellular protein catabolic process:WAC | negative regulation of protein catabolic process:WAC | regulation of proteasomal protein catabolic process:WAC | histone modification:WAC | regulation of protein complex assembly:M…		IL_1B	6.75354	6.75354	0.0728845		C	CT	0.0498643	0.0498643	361	0.997	0	FALSE	-0.00902382	0.655311	0.113792
rs117708970:28169706:G:A	FALSE		10	10p12.1	a347	28169706	rs6481492:28207393:T:C	0.860289	FALSE	ARMC4 (0 kb, intron/Intron/MODIFIER); RPL36AP55 (23 kb); RN7SKP132 (97 kb); MKX (130 kb)	ARMC4:protein_coding(KNOWN); RPL36AP55:pseudogene(KNOWN); RN7SKP132:misc_RNA(KNOWN); MKX:protein_coding(KNOWN)	ARMC4: armadillo repeat containing 4 (0 kb)	-0.0852394	-0.182938	10.16	0.798572	0.41	0.24	0.03	7	7		NA	ABI1 | ARMC4 | BAMBI | MASTL | RAB18 | WAC		ABI1 ARMC4 BAMBI MASTL MKX MPP7 RAB18 RN7SKP132 RPL36AP55 WAC	ARMC4, MKX, MPP7, RP11-360I20.2, WAC	101929202, 143098, 283078, 51322, 55130				histone H2B ubiquitination:WAC | histone ubiquitination:WAC | covalent chromatin modification:WAC | regulation of cellular protein catabolic process:WAC | negative regulation of cellular protein catabolic process:WAC | negative regulation of protein catabolic process:WAC | regulation of proteasomal protein catabolic process:WAC | histone modification:WAC | regulation of protein complex assembly:M…		IL_1B	6.75354	6.75354	0.0728845		A	G	0.0498643	0.0498643	361	0.997	0	FALSE	-0.00902382	0.655311	0.113792
rs79169887:28152057:T:C	FALSE		10	10p12.1	a347	28152057	rs6481492:28207393:T:C	0.860287	FALSE	ARMC4 (0 kb, intron/Intron/MODIFIER); RPL36AP55 (41 kb); RN7SKP132 (79 kb); MKX (120 kb)	ARMC4:protein_coding(KNOWN); RPL36AP55:pseudogene(KNOWN); RN7SKP132:misc_RNA(KNOWN); MKX:protein_coding(KNOWN)	ARMC4: armadillo repeat containing 4 (0 kb)	-0.202427	-0.207974	3.475	0.798789	0.26	0.2	0.06	6	6	Motifs|PWM|Hbp1|, Motifs|PWM|Sox7|, Motifs|PWM|Sox15|, Motifs|PWM|Sox8|, Motifs|PWM|Sox13|, Motifs|PWM|Sox5|, Motifs|PWM|Sry|	NA	ABI1 | ARMC4 | BAMBI | MASTL | RAB18 | WAC		ABI1 ARMC4 BAMBI MASTL MKX MPP7 RAB18 RN7SKP132 RPL36AP55 WAC	ARMC4, MKX, MPP7, RP11-360I20.2, WAC	101929202, 143098, 283078, 51322, 55130				histone H2B ubiquitination:WAC | histone ubiquitination:WAC | covalent chromatin modification:WAC | regulation of cellular protein catabolic process:WAC | negative regulation of cellular protein catabolic process:WAC | negative regulation of protein catabolic process:WAC | regulation of proteasomal protein catabolic process:WAC | histone modification:WAC | regulation of protein complex assembly:M…		IL_1B	6.75334	6.75334	0.0728819		C	T	0.0498656	0.0498656	361	0.998	0	FALSE	-0.0089835	0.655361	0.113826
rs112900658:28209022:CA:C	FALSE		10	10p12.1	a347	28209022	rs6481492:28207393:T:C	0.868624	FALSE	ARMC4 (0 kb); RPL36AP55 (15 kb); MPP7 (130 kb); RN7SKP132 (140 kb)	ARMC4:protein_coding(KNOWN); RPL36AP55:pseudogene(KNOWN); MPP7:protein_coding(KNOWN); RN7SKP132:misc_RNA(KNOWN)	ARMC4: armadillo repeat containing 4 (0 kb)											NA	ABI1 | ARMC4 | BAMBI | MASTL | RAB18 | WAC		ABI1 ARMC4 BAMBI MASTL MKX MPP7 RAB18 RN7SKP132 RPL36AP55 WAC	ARMC4, MKX, MPP7, RP11-360I20.2, WAC	101929202, 143098, 283078, 51322, 55130				histone H2B ubiquitination:WAC | histone ubiquitination:WAC | covalent chromatin modification:WAC | regulation of cellular protein catabolic process:WAC | negative regulation of cellular protein catabolic process:WAC | negative regulation of protein catabolic process:WAC | regulation of proteasomal protein catabolic process:WAC | histone modification:WAC | regulation of protein complex assembly:M…		IL_1B	6.70581	6.70581	0.0723374		C	CA	0.0713378	0.0713378	361	0.927	0	FALSE	0.0536581	0.560844	0.119876
rs149975922:28244068:T:C	FALSE		10	10p12.1	a347	28244068	rs6481492:28207393:T:C	0.85998	FALSE	ARMC4 (0 kb, intron/Intron/MODIFIER | nc-RNA/Non coding transcript/MODIFIER | near_gene/Downstream gene/MODIFIER); RPL36AP55 (50 kb); MPP7 (96 kb); RN7SKP132 (170 kb)	ARMC4:protein_coding(KNOWN); RPL36AP55:pseudogene(KNOWN); MPP7:protein_coding(KNOWN); RN7SKP132:misc_RNA(KNOWN)	ARMC4: armadillo repeat containing 4 (0 kb)	0.278627	-0.134523	7.237	0.561371	0.22	0.2	0.04	7	7		NA	ABI1 | ARMC4 | BAMBI | MASTL | RAB18 | WAC		ABI1 ARMC4 BAMBI MASTL MKX MPP7 RAB18 RN7SKP132 RPL36AP55 WAC	ARMC4, MKX, MPP7, RP11-360I20.2, WAC	101929202, 143098, 283078, 51322, 55130				histone H2B ubiquitination:WAC | histone ubiquitination:WAC | covalent chromatin modification:WAC | regulation of cellular protein catabolic process:WAC | negative regulation of cellular protein catabolic process:WAC | negative regulation of protein catabolic process:WAC | regulation of proteasomal protein catabolic process:WAC | histone modification:WAC | regulation of protein complex assembly:M…		IL_1B	6.4998	6.4998	0.0699751		C	T	0.0526593	0.0526593	361	0.997	0	FALSE	0.0174208	0.747593	0.228264
rs117525151:28241384:G:C	FALSE		10	10p12.1	a347	28241384	rs6481492:28207393:T:C	0.859888	FALSE	ARMC4 (0 kb, intron/Intron/MODIFIER | nc-RNA/Non coding transcript/MODIFIER | near_gene/Downstream gene/MODIFIER); RPL36AP55 (47 kb); MPP7 (99 kb); RN7SKP132 (170 kb)	ARMC4:protein_coding(KNOWN); RPL36AP55:pseudogene(KNOWN); MPP7:protein_coding(KNOWN); RN7SKP132:misc_RNA(KNOWN)	ARMC4: armadillo repeat containing 4 (0 kb)	-0.148986	-0.185282	5.568	0.727668	0.22	0.02	0	6	6	Motifs|PWM|DMRT3|	NA	ABI1 | ARMC4 | BAMBI | MASTL | RAB18 | WAC		ABI1 ARMC4 BAMBI MASTL MKX MPP7 RAB18 RN7SKP132 RPL36AP55 WAC	ARMC4, MKX, MPP7, RP11-360I20.2, WAC	101929202, 143098, 283078, 51322, 55130				histone H2B ubiquitination:WAC | histone ubiquitination:WAC | covalent chromatin modification:WAC | regulation of cellular protein catabolic process:WAC | negative regulation of cellular protein catabolic process:WAC | negative regulation of protein catabolic process:WAC | regulation of proteasomal protein catabolic process:WAC | histone modification:WAC | regulation of protein complex assembly:M…		IL_1B	6.49827	6.49827	0.0699578		C	G	0.0526565	0.0526565	361	0.997	0	FALSE	0.0173977	0.747488	0.228262
rs73606015:28241328:T:A	FALSE		10	10p12.1	a347	28241328	rs6481492:28207393:T:C	0.859854	FALSE	ARMC4 (0 kb, intron/Intron/MODIFIER | nc-RNA/Non coding transcript/MODIFIER | near_gene/Downstream gene/MODIFIER); RPL36AP55 (47 kb); MPP7 (99 kb); RN7SKP132 (170 kb)	ARMC4:protein_coding(KNOWN); RPL36AP55:pseudogene(KNOWN); MPP7:protein_coding(KNOWN); RN7SKP132:misc_RNA(KNOWN)	ARMC4: armadillo repeat containing 4 (0 kb)	-0.307566	-0.210622	3.448	0.609899	0.21	0.03	0	6	6	Motifs|PWM|FOXP1|, Motifs|PWM|FOXP1|, Motifs|PWM|FOXP1|, Motifs|PWM|FOXP1|, Motifs|PWM|Zfp105|, Motifs|PWM|Elf3|, Motifs|PWM|Srf|, Motifs|PWM|FOXP1|, Motifs|PWM|Zfp105|, Motifs|PWM|Elf3|, Motifs|PWM|Srf|, Motifs|PWM|Srf|, Motifs|PWM|Zfp105|, Motifs|PWM|Tcf3|, Motifs|PWM|FOXJ2|, Motifs|PWM|FOXJ2|, Motifs|PWM|FOXJ3|, Motifs|PWM|FOXJ3|	NA	ABI1 | ARMC4 | BAMBI | MASTL | RAB18 | WAC		ABI1 ARMC4 BAMBI MASTL MKX MPP7 RAB18 RN7SKP132 RPL36AP55 WAC	ARMC4, MKX, MPP7, RP11-360I20.2, WAC	101929202, 143098, 283078, 51322, 55130				histone H2B ubiquitination:WAC | histone ubiquitination:WAC | covalent chromatin modification:WAC | regulation of cellular protein catabolic process:WAC | negative regulation of cellular protein catabolic process:WAC | negative regulation of protein catabolic process:WAC | regulation of proteasomal protein catabolic process:WAC | histone modification:WAC | regulation of protein complex assembly:M…		IL_1B	6.48964	6.48964	0.0698583		A	T	0.0527077	0.0527077	361	0.994	0	FALSE	0.0173506	0.750369	0.229997
rs201906114:28209790:G:GA	FALSE		10	10p12.1	a347	28209790	rs201906114:28209790:G:GA	1	TRUE	ARMC4 (0 kb, intron/Intron/MODIFIER); RPL36AP55 (16 kb); MPP7 (130 kb); RN7SKP132 (140 kb)	ARMC4:protein_coding(KNOWN); RPL36AP55:pseudogene(KNOWN); MPP7:protein_coding(KNOWN); RN7SKP132:misc_RNA(KNOWN)	ARMC4: armadillo repeat containing 4 (0 kb)								5	5	Motifs|PWM|IRF|, Motifs|PWM|IRF|, Motifs|PWM|Elf3|, Motifs|PWM|Srf|, Motifs|PWM|Srf|, Motifs|PWM|Srf|, Motifs|PWM|Tcfap2e|, Motifs|PWM|Tcfap2e|, Chromatin_Structure|DNase-seq|Hgf|, Chromatin_Structure|DNase-seq|Hpdlf|	NA	ABI1 | ARMC4 | BAMBI | MASTL | RAB18 | WAC		ABI1 ARMC4 BAMBI MASTL MKX MPP7 RAB18 RN7SKP132 RPL36AP55 WAC	ARMC4, MKX, MPP7, RP11-360I20.2, WAC	101929202, 143098, 283078, 51322, 55130				histone H2B ubiquitination:WAC | histone ubiquitination:WAC | covalent chromatin modification:WAC | regulation of cellular protein catabolic process:WAC | negative regulation of cellular protein catabolic process:WAC | negative regulation of protein catabolic process:WAC | regulation of proteasomal protein catabolic process:WAC | histone modification:WAC | regulation of protein complex assembly:M…		IL_1B	6.19746	6.19746	0.0665027		GA	G	0.0639815	0.0639815	361	0.947	0	FALSE	-0.0119492	0.572515	0.117654
rs141220505:24353734:G:T	FALSE		10	10p12.2	a347	24353734	rs141220505:24353734:G:T	1	TRUE	KIAA1217 (0 kb, intron/Intron/MODIFIER); MIR603 (210 kb)	KIAA1217:protein_coding(KNOWN); MIR603:miRNA(KNOWN)	KIAA1217: KIAA1217 (0 kb)	-0.398182	-0.234501	0.516	0.206082	0.27	0.15	0.02	6	6		NA	ARHGAP21		ARHGAP21 KIAA1217 MIR603	KIAA1217, MIR603	56243, 693188						IL_8	6.0551	6.0551	0.0614054		T	G	0.0183221	0.0183221	382	0.844	0	FALSE	0.209555	1.2347	0.3167
rs139981935:130683799:G:GAC	FALSE		10	10q26.3	a368	130683799	rs139981935:130683799:G:GAC	1	TRUE								0.29	0.16	0.06	4	4	4:Chromatin_Structure|FAIRE|Nhbe|, Chromatin_Structure|FAIRE|UrotsaUt189|, Chromatin_Structure|FAIRE|Urotsa|, Chromatin_Structure|DNase-seq|Hsmm|, Chromatin_Structure|DNase-seq|Hsmmemb|, Protein_Binding|ChIP-seq|NFATC1|GM12878|, Protein_Binding|ChIP-seq|PBX3|GM12878|, Protein_Binding|ChIP-seq|SUZ12|H1-hESC|;4:NA	NA											IL_1B	6.09865	6.09865	0.0653666		G	GAC	0.0449449	0.0449449	361	0.859	0	FALSE	0.0778246	0.375877	0.265416
rs148317033:17544873:G:A	FALSE		11	11p15.1	a373	17544873	rs148317033:17544873:G:A	1	TRUE	USH1C (0 kb, intron/NMD transcript/MODIFIER | intron/Intron/MODIFIER | near_gene/Upstream gene/MODIFIER); OTOG (24 kb); ABCC8 (46 kb); SDHCP4 (87 kb)	USH1C:protein_coding(KNOWN); OTOG:protein_coding(KNOWN); ABCC8:protein_coding(KNOWN); SDHCP4:pseudogene(KNOWN)	USH1C: Usher syndrome 1C (autosomal recessive, severe) (0 kb)	0.221916	-0.0103178	4.875	0.512607	0.29	0.22	0.3	5	5		NA	LDHC | PIK3C2A		ABCC8 KCNC1 KCNJ11 LDHC MYOD1 NCR3LG1 NUCB2 OTOG PIK3C2A SDHCP4 USH1C	ABCC8, KCNJ11, OTOG, USH1C	10083, 340990, 3767, 6833	Type II diabetes mellitus:ABCC8,KCNJ11 | Insulin secretion:ABCC8,KCNJ11	Regulation of insulin secretion:ABCC8,KCNJ11 | Potassium Channels:ABCC8,KCNJ11 | Integration of energy metabolism:ABCC8,KCNJ11 | Inwardly rectifying K+ channels:ABCC8,KCNJ11 | ABC transporter disorders:ABCC8,KCNJ11 | Neuronal System:ABCC8,KCNJ11 | Disorders of transmembrane transporters:ABCC8,KCNJ11	hyperinsulinism:ABCC8,KCNJ11 | endocrine pancreas disease:ABCC8,KCNJ11 | gestational diabetes:ABCC8,KCNJ11 | pancreas disease:ABCC8,KCNJ11	regulation of hormone secretion:ABCC8,KCNJ11 | hormone secretion:ABCC8,KCNJ11 | hormone transport:ABCC8,KCNJ11 | regulation of insulin secretion:ABCC8,KCNJ11 | signal release:ABCC8,KCNJ11 | insulin secretion:ABCC8,KCNJ11 | regulation of peptide hormone secretion:ABCC8,KCNJ11 | cellular potassium ion transport:ABCC8,KCNJ11 | potassium ion transmembrane transport:ABCC8,KCNJ11 | potassium ion transp…		IL_8	6.11261	6.11261	0.0620333		A	G	0.0145839	0.0145839	382	0.966	0	FALSE	0.4597	0.0482376	-0.275267
rs143096310:24100713:G:A	FALSE		11	11p14.3	a374	24100713	rs143096310:24100713:G:A	1	TRUE	RNU6-783P (230 kb)	RNU6-783P:snRNA(KNOWN)	RNU6-783P: RNA, U6 small nuclear 783, pseudogene (230 kb)	-0.337467	-0.203172	2.09	0.26533	0.31	0.03	0.01	7	7		NA			RNU6-783P								IL_10	6.42537	6.42537	0.0646236		A	G	0.0140671	0.0140671	387	0.804	0	FALSE	0.164284	2.33017	1.29471
rs77035613:128292771:T:C	FALSE		11	11q24.3	a395	128292771	rs77035613:128292771:T:C	1	TRUE	ETS1 (36 kb)	ETS1:protein_coding(KNOWN)	ETS1: v-ets avian erythroblastosis virus E26 oncogene homolog 1 (36 kb)			2.441	0.58374	0.35	0.5	0.39	3a	3		NA	ETS1		ETS1	ETS1, RP11-1007G5.2, RP11-744N12.3	101929517, 101929538, 2113			malignant ovarian surface epithelial-stromal neoplasm:ETS1 | ovary epithelial cancer:ETS1 | ovarian carcinoma:ETS1	cellular response to hydrogen peroxide:ETS1 | response to antibiotic:ETS1 | response to hydrogen peroxide:ETS1 | myeloid cell homeostasis:ETS1 | cellular response to antibiotic:ETS1		MIP_1A	6.02989	6.02989	0.063218		C	T	0.0222345	0.0222345	369	0.863	0	FALSE	-0.0578983	0.936844	0.72594
rs11223001:132161625:A:G	FALSE		11	11q25	a396	132161625	rs11223001:132161625:A:G	1	TRUE	NTM (0 kb, intron/Intron/MODIFIER | nc-RNA/Non coding transcript/MODIFIER); NTM-IT (6.6 kb); OPCML (120 kb); RNU6-1182P (230 kb)	NTM:protein_coding(KNOWN); NTM-IT:sense_intronic(KNOWN); OPCML:protein_coding(KNOWN); RNU6-1182P:snRNA(KNOWN)	NTM: neurotrimin (0 kb)			0.43	0.516216	0.23	0.13	0.07	5	5		NA			NTM NTM-IT OPCML RNU6-1182P	NTM, NTM-IT, OPCML	100874281, 4978, 50863		Post-translational modification: synthesis of GPI-anchored proteins:NTM,OPCML	cystadenocarcinoma:OPCML | serous cystadenocarcinoma:OPCML | malignant ovarian surface epithelial-stromal neoplasm:OPCML | ovary epithelial cancer:OPCML | ovarian carcinoma:OPCML	cell recognition:NTM,OPCML | neuron recognition:NTM,OPCML		MIP_1A	7.76319	7.76319	0.0826489		G	A	0.0113062	0.0113062	369	0.944	0	FALSE	0.129284	1.05858	1.30854
rs74919844:132807784:G:A	FALSE		11	11q25	a396	132807784	rs74919844:132807784:G:A	1	TRUE	OPCML (0 kb, intron/Intron/MODIFIER | nc-RNA/Non coding transcript/MODIFIER); OPCML-IT2 (78 kb)	OPCML:protein_coding(KNOWN); OPCML-IT2:sense_intronic(KNOWN)	OPCML: opioid binding protein/cell adhesion molecule-like (0 kb)			2.097	0.475387	0.21	0.19	0.07	5	5	Chromatin_Structure|DNase-seq|Cerebellumoc|	NA			OPCML OPCML-IT2	OPCML	4978		Post-translational modification: synthesis of GPI-anchored proteins:OPCML	cystadenocarcinoma:OPCML | serous cystadenocarcinoma:OPCML | malignant ovarian surface epithelial-stromal neoplasm:OPCML | ovary epithelial cancer:OPCML | ovarian carcinoma:OPCML	cell recognition:OPCML | neuron recognition:OPCML		MCP_1_MCAF	7.03196	7.03196	0.0709611		A	G	0.0251083	0.0251083	388	0.958	0	FALSE	0.246363	0.948691	0.326784
rs115289177:132807740:C:A	FALSE		11	11q25	a396	132807740	rs74919844:132807784:G:A	1	FALSE	OPCML (0 kb, intron/Intron/MODIFIER | nc-RNA/Non coding transcript/MODIFIER); OPCML-IT2 (78 kb)	OPCML:protein_coding(KNOWN); OPCML-IT2:sense_intronic(KNOWN)	OPCML: opioid binding protein/cell adhesion molecule-like (0 kb)			4.186	0.633047	0.27	0.14	0.09	5	5		NA			OPCML OPCML-IT2	OPCML	4978		Post-translational modification: synthesis of GPI-anchored proteins:OPCML	cystadenocarcinoma:OPCML | serous cystadenocarcinoma:OPCML | malignant ovarian surface epithelial-stromal neoplasm:OPCML | ovary epithelial cancer:OPCML | ovarian carcinoma:OPCML	cell recognition:OPCML | neuron recognition:OPCML		MCP_1_MCAF	7.03136	7.03136	0.0709542		A	C	0.0251083	0.0251083	388	0.959	0	FALSE	0.246401	0.948674	0.326853
rs116843449:132804822:G:A	FALSE		11	11q25	a396	132804822	rs74919844:132807784:G:A	0.999274	FALSE	OPCML (0 kb, intron/Intron/MODIFIER | nc-RNA/Non coding transcript/MODIFIER); OPCML-IT2 (75 kb)	OPCML:protein_coding(KNOWN); OPCML-IT2:sense_intronic(KNOWN)	OPCML: opioid binding protein/cell adhesion molecule-like (0 kb)			0.347	0.356547	0.35	0.04	0	6	6		NA			OPCML OPCML-IT2	OPCML	4978		Post-translational modification: synthesis of GPI-anchored proteins:OPCML	cystadenocarcinoma:OPCML | serous cystadenocarcinoma:OPCML | malignant ovarian surface epithelial-stromal neoplasm:OPCML | ovary epithelial cancer:OPCML | ovarian carcinoma:OPCML	cell recognition:OPCML | neuron recognition:OPCML		MCP_1_MCAF	7.00254	7.00254	0.0706462		A	G	0.0250656	0.0250656	388	0.962	0	FALSE	0.248225	0.949294	0.329264
rs142212729:132189198:C:T	FALSE		11	11q25	a396	132189198	rs11223001:132161625:A:G	0.87769	FALSE	NTM (0 kb, intron/Intron/MODIFIER | nc-RNA/Non coding transcript/MODIFIER | near_gene/Downstream gene/MODIFIER); NTM-IT (34 kb); OPCML (96 kb); RNU6-1182P (210 kb)	NTM:protein_coding(KNOWN); NTM-IT:sense_intronic(KNOWN); OPCML:protein_coding(KNOWN); RNU6-1182P:snRNA(KNOWN)	NTM: neurotrimin (0 kb)			2.489	0.226272	0.36	0.17	0.09	7	7		NA			NTM NTM-IT OPCML RNU6-1182P	NTM, NTM-IT, OPCML	100874281, 4978, 50863		Post-translational modification: synthesis of GPI-anchored proteins:NTM,OPCML	cystadenocarcinoma:OPCML | serous cystadenocarcinoma:OPCML | malignant ovarian surface epithelial-stromal neoplasm:OPCML | ovary epithelial cancer:OPCML | ovarian carcinoma:OPCML	cell recognition:NTM,OPCML | neuron recognition:NTM,OPCML		MIP_1A	6.69879	6.69879	0.0707443		T	C	0.0122534	0.0122534	369	0.957	0	FALSE	0.0757696	1.02284	1.29151
rs114252097:132803025:G:C	FALSE		11	11q25	a396	132803025	rs74919844:132807784:G:A	0.988202	FALSE	OPCML (0 kb, intron/Intron/MODIFIER | nc-RNA/Non coding transcript/MODIFIER); OPCML-IT2 (73 kb)	OPCML:protein_coding(KNOWN); OPCML-IT2:sense_intronic(KNOWN)	OPCML: opioid binding protein/cell adhesion molecule-like (0 kb)			0.214	0.412389	0.31	0.26	0.11	5	5	Chromatin_Structure|DNase-seq|T47d|	NA			OPCML OPCML-IT2	OPCML	4978		Post-translational modification: synthesis of GPI-anchored proteins:OPCML	cystadenocarcinoma:OPCML | serous cystadenocarcinoma:OPCML | malignant ovarian surface epithelial-stromal neoplasm:OPCML | ovary epithelial cancer:OPCML | ovarian carcinoma:OPCML	cell recognition:OPCML | neuron recognition:OPCML		MCP_1_MCAF	6.65342	6.65342	0.0669084		C	G	0.025567	0.025567	388	0.949	0	FALSE	0.261103	0.963741	0.354196
rs73092328:31917041:A:G	FALSE		12	12p11.21	a403	31917041	rs73092328:31917041:A:G	1	TRUE	H3F3C (27 kb); AMN1 (35 kb); RNU6-1069P (39 kb); METTL20 (91 kb)	H3F3C:protein_coding(KNOWN); AMN1:protein_coding(KNOWN); RNU6-1069P:snRNA(KNOWN); METTL20:protein_coding(KNOWN)	H3F3C: H3 histone, family 3C (27 kb)	-0.214236	-0.188203	1.342	0.442831	0.25	0.04	0	7	7		NA	C12orf35 | DDX11 | DENND5B | FAM60A | KIAA1551		AK4P3 AMN1 C12orf35 DDX11 DENND5B DENND5B-AS1 FAM60A H3F3C KIAA1551 METTL20 RNU5F-4P RNU6-1069P RPL31P50	AMN1, DENND5B-AS1, H3F3C, METTL20	100874249, 196394, 254013, 440093				proteasomal protein catabolic process:AMN1 | negative regulation of cellular catabolic process:ETFBKMT | negative regulation of catabolic process:ETFBKMT | peptidyl-lysine trimethylation:ETFBKMT | peptidyl-lysine methylation:ETFBKMT | positive regulation of growth:H3-5		IL_1B	6.01824	6.01824	0.0644415		G	A	0.0204553	0.0204553	361	0.843	0	FALSE	0.125369	0.709094	0.490741
rs73148387:80533609:T:A	FALSE		12	12q21.31	a413	80533609	rs73148387:80533609:T:A	1	TRUE	OTOGL (70 kb); RNU7-106P (71 kb); RPL7P38 (110 kb); SNRPGP20 (150 kb)	OTOGL:protein_coding(KNOWN); RNU7-106P:snRNA(KNOWN); RPL7P38:pseudogene(KNOWN); SNRPGP20:pseudogene(KNOWN)	OTOGL: otogelin-like (70 kb)	0.00166701	-0.168477	4.622	0.375057	0.33	0.29	0.07	7	7		NA	PAWR | PPP1R12A		OTOGL PAWR PPP1R12A RN7SKP261 RNU7-106P RPL7P38 SNRPGP20	OTOGL, PPP1R12A, RP11-84G21.1	101928294, 283310, 4659	Focal adhesion:PPP1R12A | cAMP signaling pathway:PPP1R12A | Platelet activation:PPP1R12A | Vascular smooth muscle contraction:PPP1R12A | Oxytocin signaling pathway:PPP1R12A | cGMP-PKG signaling pathway:PPP1R12A | Proteoglycans in cancer:PPP1R12A	RHO GTPase Effectors:PPP1R12A | Signaling by Rho GTPases:PPP1R12A | RHO GTPases activate PKNs:PPP1R12A		cellular response to drug:PPP1R12A | centrosome cycle:PPP1R12A | microtubule organizing center organization:PPP1R12A		IL_10	6.06855	6.06855	0.0607805		A	T	0.0150799	0.0150799	387	0.935	0	FALSE	0.091263	1.96776	1.26696
rs12823206:91170388:G:A	FALSE		12	12q21.33	a415	91170388	rs12823206:91170388:G:A	1	TRUE	CCER1 (130 kb); LINC00615 (140 kb); EPYC (190 kb)	CCER1:protein_coding(KNOWN); LINC00615:lincRNA(KNOWN); EPYC:protein_coding(KNOWN)	CCER1: coiled-coil glutamate-rich protein 1 (130 kb)	-0.323791	-0.222022	1.997	0.195125	0.27	0.12	0.03	7	7		NA			CCER1 EPYC LINC00615	CCER1, EPYC, LINC00615	1833, 196477, 439916			myopia:EPYC			IL_1B	6.44738	6.44738	0.0693737		A	G	0.0221055	0.0221055	361	0.877	0	FALSE	-0.154679	1.73888	0.670782
rs148526230:108523190:C:T	FALSE		12	12q23.3	a418	108523190	rs148526230:108523190:C:T	1	TRUE	WSCD2 (0.058 kb, near_gene/Upstream gene/MODIFIER); CMKLR1 (160 kb)	WSCD2:protein_coding(KNOWN); CMKLR1:protein_coding(KNOWN)	WSCD2: WSC domain containing 2 (0.058 kb)	0.350664	2.26981	9.926	0.874369	0.36	0.42	0.89	4	4		NA	BTBD11 | CMKLR1 | CORO1C | PWP1	GPR98	BTBD11 CMKLR1 CORO1C GPR98 PWP1 WSCD2	CMKLR1, CORO1C, PWP1, WSCD2	11137, 1240, 23603, 9671		Class A/1 (Rhodopsin-like receptors):CMKLR1	atopic dermatitis:CMKLR1 | dermatitis:CMKLR1	regulation of granulocyte chemotaxis:CMKLR1 | regulation of leukocyte chemotaxis:CMKLR1 | negative regulation of protein phosphorylation:CORO1C,PWP1 | regulation of substrate adhesion-dependent cell spreading:CORO1C | regulation of cell-matrix adhesion:CORO1C | negative regulation of cell-matrix adhesion:CORO1C | regulation of cell-substrate adhesion:CORO1C | regulation of focal adhesion assembly…		IL_8	7.14027	7.14027	0.0732108		T	C	0.0280525	0.0280525	382	0.833	0	FALSE	0.0488409	0.83193	0.0374684
rs56252877:108527151:C:T	FALSE		12	12q23.3	a418	108527151	rs148526230:108523190:C:T	0.995501	FALSE	WSCD2 (0 kb, intron/Intron/MODIFIER | nc-RNA/Non coding transcript/MODIFIER); CMKLR1 (150 kb)	WSCD2:protein_coding(KNOWN); CMKLR1:protein_coding(KNOWN)	WSCD2: WSC domain containing 2 (0 kb)	-0.313405	-0.205689	1.289	0.744469	0.26	0.41	0.49	7	7		NA	BTBD11 | CMKLR1 | CORO1C | PWP1	GPR98	BTBD11 CMKLR1 CORO1C GPR98 PWP1 WSCD2	CMKLR1, CORO1C, PWP1, WSCD2	11137, 1240, 23603, 9671		Class A/1 (Rhodopsin-like receptors):CMKLR1	atopic dermatitis:CMKLR1 | dermatitis:CMKLR1	regulation of granulocyte chemotaxis:CMKLR1 | regulation of leukocyte chemotaxis:CMKLR1 | negative regulation of protein phosphorylation:CORO1C,PWP1 | regulation of substrate adhesion-dependent cell spreading:CORO1C | regulation of cell-matrix adhesion:CORO1C | negative regulation of cell-matrix adhesion:CORO1C | regulation of cell-substrate adhesion:CORO1C | regulation of focal adhesion assembly…		IL_8	7.08786	7.08786	0.0726424		T	C	0.028624	0.028624	382	0.83	0	FALSE	0.0577471	0.822634	0.0417734
rs114196316:108544655:C:G	FALSE		12	12q23.3	a418	108544655	rs148526230:108523190:C:T	0.984752	FALSE	WSCD2 (0 kb, intron/Intron/MODIFIER | nc-RNA/Non coding transcript/MODIFIER); CMKLR1 (140 kb)	WSCD2:protein_coding(KNOWN); CMKLR1:protein_coding(KNOWN)	WSCD2: WSC domain containing 2 (0 kb)	0.193556	-0.119183	6.424	0.737733	0.37	0.42	0.31	5	5		NA	BTBD11 | CMKLR1 | CORO1C | PWP1	GPR98	BTBD11 CMKLR1 CORO1C GPR98 PWP1 WSCD2	CMKLR1, CORO1C, PWP1, WSCD2	11137, 1240, 23603, 9671		Class A/1 (Rhodopsin-like receptors):CMKLR1	atopic dermatitis:CMKLR1 | dermatitis:CMKLR1	regulation of granulocyte chemotaxis:CMKLR1 | regulation of leukocyte chemotaxis:CMKLR1 | negative regulation of protein phosphorylation:CORO1C,PWP1 | regulation of substrate adhesion-dependent cell spreading:CORO1C | regulation of cell-matrix adhesion:CORO1C | negative regulation of cell-matrix adhesion:CORO1C | regulation of cell-substrate adhesion:CORO1C | regulation of focal adhesion assembly…		IL_8	6.7175	6.7175	0.0686208		G	C	0.0290963	0.0290963	382	0.853	0	FALSE	0.0493407	0.805098	0.0250453
rs8002506:32185857:G:C	FALSE		13	13q12.3	a426	32185857	rs8002506:32185857:G:C	1	TRUE	RXFP2 (130 kb); EEF1DP3 (240 kb)	RXFP2:protein_coding(KNOWN); EEF1DP3:pseudogene(KNOWN)	RXFP2: relaxin/insulin-like family peptide receptor 2 (130 kb)	-0.351168	-0.214626	0.674	0.637224	0.38	0.14	0.01	6	6		NA			EEF1DP3 RXFP2	RXFP2	122042						VCAM_1	6.07095	6.07095	0.0605028		C	G	0.0462737	0.0462737	389	0.998	0	FALSE	0.14293	0.403626	0.0192242
rs7983445:32181436:G:T	FALSE		13	13q12.3	a426	32181436	rs8002506:32185857:G:C	1	FALSE	RXFP2 (130 kb); EEF1DP3 (240 kb)	RXFP2:protein_coding(KNOWN); EEF1DP3:pseudogene(KNOWN)	RXFP2: relaxin/insulin-like family peptide receptor 2 (130 kb)	-0.163883	-0.208895	0.668	0.721515	0.41	0.28	0.05	5	5	Chromatin_Structure|DNase-seq|Werirb1|	NA			EEF1DP3 RXFP2	RXFP2	122042						VCAM_1	6.07028	6.07028	0.0604956		T	G	0.0462725	0.0462725	389	1	2	FALSE	0.142913	0.403614	0.0191996
rs7328437:32173198:A:G	FALSE		13	13q12.3	a426	32173198	rs8002506:32185857:G:C	0.999583	FALSE	RXFP2 (140 kb); EEF1DP3 (250 kb)	RXFP2:protein_coding(KNOWN); EEF1DP3:pseudogene(KNOWN)	RXFP2: relaxin/insulin-like family peptide receptor 2 (140 kb)	-0.0163821	-0.181525	5.272	0.749549	0.28	0.17	0.03	7	7		NA			EEF1DP3 RXFP2	RXFP2	122042						VCAM_1	6.04361	6.04361	0.0602098		G	A	0.046676	0.046676	389	0.989	0	FALSE	0.141832	0.397602	0.0171709
rs75228708:46282977:A:G	FALSE		13	13q14.13	a429	46282977	rs75228708:46282977:A:G	1	TRUE	SPERT (0 kb, intron/Intron/MODIFIER); AKR1B1P4 (20 kb); LINC01055 (26 kb); COX4I1P2 (36 kb)	SPERT:protein_coding(KNOWN); AKR1B1P4:pseudogene(KNOWN); LINC01055:antisense(KNOWN); COX4I1P2:pseudogene(KNOWN)	SPERT: spermatid associated (0 kb)	-0.0123112	-0.168101	1.111	0.554602	0.2	0.22	0.16	5	5		NA	COG3 | GTF2F2 | SPERT		AKR1B1P4 COG3 COX4I1P2 FAM194B GTF2F2 LINC01055 RNA5SP27 SIAH3 SPERT TIMM9P3 ZC3H13	COG3, FAM194B, GTF2F2, SIAH3, SPERT	220081, 220082, 283514, 2963, 83548				DNA duplex unwinding:GTF2F2 | DNA geometric change:GTF2F2 | protein glycosylation:COG3 | macromolecule glycosylation:COG3 | proteasomal protein catabolic process:SIAH3 | regulation of transcription elongation from RNA polymerase II promoter:GTF2F2 | glycosylation:COG3 | intra-Golgi vesicle-mediated transport:COG3 | protein targeting to mitochondrion:SIAH3 | glycoprotein metabolic process:COG3 | r…		IL_1B	7.03251	7.03251	0.076077		G	A	0.0531482	0.0531482	361	0.98	0	FALSE	-0.0688848	0.994709	0.478158
rs78261889:46280491:C:T	FALSE		13	13q14.13	a429	46280491	rs75228708:46282977:A:G	0.999769	FALSE	SPERT (0 kb, intron/Intron/MODIFIER); AKR1B1P4 (18 kb); LINC01055 (24 kb); COX4I1P2 (34 kb)	SPERT:protein_coding(KNOWN); AKR1B1P4:pseudogene(KNOWN); LINC01055:antisense(KNOWN); COX4I1P2:pseudogene(KNOWN)	SPERT: spermatid associated (0 kb)	0.277593	0.996271	2.604	0.413218	0.23	0.24	0.34	4	4		NA	COG3 | GTF2F2 | SPERT		AKR1B1P4 COG3 COX4I1P2 FAM194B GTF2F2 LINC01055 RNA5SP27 SIAH3 SPERT TIMM9P3 ZC3H13	COG3, FAM194B, GTF2F2, SIAH3, SPERT	220081, 220082, 283514, 2963, 83548				DNA duplex unwinding:GTF2F2 | DNA geometric change:GTF2F2 | protein glycosylation:COG3 | macromolecule glycosylation:COG3 | proteasomal protein catabolic process:SIAH3 | regulation of transcription elongation from RNA polymerase II promoter:GTF2F2 | glycosylation:COG3 | intra-Golgi vesicle-mediated transport:COG3 | protein targeting to mitochondrion:SIAH3 | glycoprotein metabolic process:COG3 | r…		IL_1B	6.96626	6.96626	0.0753187		T	C	0.053072	0.053072	361	0.979	0	FALSE	-0.0694494	0.991096	0.476177
rs80072371:46287373:C:A	FALSE		13	13q14.13	a429	46287373	rs75228708:46282977:A:G	0.970613	FALSE	SPERT (0 kb, exon/Stop gained/HIGH); AKR1B1P4 (25 kb); LINC01055 (31 kb); COX4I1P2 (41 kb)	SPERT:protein_coding(KNOWN); AKR1B1P4:pseudogene(KNOWN); LINC01055:antisense(KNOWN); COX4I1P2:pseudogene(KNOWN)	SPERT: spermatid associated (0 kb)	-0.247302	-0.595437	25.3	0.982549	0.14	0.25	0.42	5	5	Motifs|PWM|Zic1|, Motifs|PWM|Zic2|, Motifs|PWM|Zic3|, Motifs|PWM|ZIC1|, Motifs|PWM|ZIC3|, Motifs|PWM|ZIC3|, Motifs|PWM|ZIC4|, Chromatin_Structure|DNase-seq|Caco2|, Chromatin_Structure|DNase-seq|Monocd14|	NA	COG3 | GTF2F2 | SPERT		AKR1B1P4 COG3 COX4I1P2 FAM194B GTF2F2 LINC01055 RNA5SP27 SIAH3 SPERT TIMM9P3 ZC3H13	COG3, FAM194B, GTF2F2, SIAH3, SPERT	220081, 220082, 283514, 2963, 83548				DNA duplex unwinding:GTF2F2 | DNA geometric change:GTF2F2 | protein glycosylation:COG3 | macromolecule glycosylation:COG3 | proteasomal protein catabolic process:SIAH3 | regulation of transcription elongation from RNA polymerase II promoter:GTF2F2 | glycosylation:COG3 | intra-Golgi vesicle-mediated transport:COG3 | protein targeting to mitochondrion:SIAH3 | glycoprotein metabolic process:COG3 | r…		IL_1B	6.58914	6.58914	0.0710004		A	C	0.0544668	0.0544668	361	0.98	0	FALSE	-0.0609893	0.959364	0.441732
rs186016106:59941115:C:T	FALSE	EXTRACT: IL_10-> || low maf // IL_6-> || low maf // IL_12-> || low maf // MCP_1_MCAF-> || low maf // VEGF-> || low maf // ICAM_1-> || low maf // VCAM_1-> || low maf // IL_8-> || low maf; TOPLIST: IL_10-> || low maf || toplist low maf // IL_6-> || low maf || toplist low maf // IL_12-> || low maf || toplist low maf // MCP_1_MCAF-> || low maf || toplist low maf // VEGF-> || low maf || toplist low ma…	13	13q21.2	a432	59941115	rs186016106:59941115:C:T	1	TRUE	RPP40P2 (100 kb); RNU7-88P (110 kb)	RPP40P2:pseudogene(KNOWN); RNU7-88P:snRNA(KNOWN)	RPP40P2: ribonuclease P/MRP 40kDa subunit pseudogene 2 (100 kb)	-0.578449	-0.267466	0.151	0.183135	0.3	0.15	0.01	7	7		NA			RNU7-88P RPP40P2								IL_1B	6.43886	6.43886	0.0692764		T	C	0.0102297	0.0102297	361	0.948	0	FALSE	0.101457	1.66286	1.18226
rs78521095:80406746:C:A	FALSE		13	13q31.1	a436	80406746	rs78521095:80406746:C:A	1	TRUE	LINC01038 (27 kb); LINC00382 (40 kb)	LINC01038:lincRNA(KNOWN); LINC00382:lincRNA(KNOWN)	LINC01038: long intergenic non-protein coding RNA 1038 (27 kb)	-0.120895	-0.165837	2.067	0.598286	0.28	0.18	0.04	5	5		NA			LINC00382 LINC01038	LINC00382	101927195						MCP_1_MCAF	6.51333	6.51333	0.0654064		A	C	0.012496	0.012496	388	0.955	0	FALSE	0.0972221	0.506064	-0.0453737
rs181715732:80332791:T:C	FALSE		13	13q31.1	a436	80332791	rs78521095:80406746:C:A	0.963782	FALSE	LINC01038 (46 kb); LINC00382 (110 kb); LINC01068 (190 kb); NDFIP2 (200 kb)	LINC01038:lincRNA(KNOWN); LINC00382:lincRNA(KNOWN); LINC01068:lincRNA(KNOWN); NDFIP2:protein_coding(KNOWN)	LINC01038: long intergenic non-protein coding RNA 1038 (46 kb)	-0.239801	-0.20125	2.885	0.596322	0.31	0.1	0	6	6		NA			LINC00382 LINC01038 LINC01068 NDFIP2	LINC00382, NDFIP2	101927195, 54602				regulation of protein modification by small protein conjugation or removal:NDFIP2		MCP_1_MCAF	6.50712	6.50712	0.0653396		C	T	0.0135388	0.0135388	388	0.918	0	FALSE	0.125364	0.52468	-0.0220797
rs17427799:92901514:T:C	FALSE		13	13q31.3	a439	92901514	rs17427799:92901514:T:C	1	TRUE	GPC5 (0 kb, intron/Intron/MODIFIER); FABP5P4 (68 kb); GPC5-AS2 (91 kb); RNU4ATAC3P (190 kb)	GPC5:protein_coding(KNOWN); FABP5P4:pseudogene(KNOWN); GPC5-AS2:antisense(KNOWN); RNU4ATAC3P:snRNA(KNOWN)	GPC5: glypican 5 (0 kb)	-0.483241	-0.248516	0.301	0.502319	0.25	0.19	0.05	6	6		NA			FABP5P4 GPC5 GPC5-AS2 GPC5-IT1 MIR548AS RNU4ATAC3P	GPC5, MIR548AS	100847092, 2262		Defective B4GALT7 causes EDS, progeroid type:GPC5 | Defective B3GAT3 causes JDSSDHD:GPC5 | Defective B3GALT6 causes EDSP2 and SEMDJL1:GPC5 | A tetrasaccharide linker sequence is required for GAG synthesis:GPC5 | Visual phototransduction:GPC5 | Diseases associated with glycosaminoglycan metabolism:GPC5 | Chondroitin sulfate/dermatan sulfate metabolism:GPC5 | Heparan sulfate/heparin (HS-GAG) metabo…		glycosaminoglycan catabolic process:GPC5 | aminoglycan catabolic process:GPC5 | glycosaminoglycan biosynthetic process:GPC5 | aminoglycan biosynthetic process:GPC5		IL_10	6.14174	6.14174	0.0615693		C	T	0.0167959	0.0167959	387	1	2	FALSE	-0.0137496	1.94651	1.04223
rs117846056:62927118:G:C	FALSE		14	14q23.2	a452	62927118	rs117846056:62927118:G:C	1	TRUE	KCNH5 (250 kb)	KCNH5:protein_coding(KNOWN)	KCNH5: potassium voltage-gated channel, subfamily H (eag-related), member 5 (250 kb)	-0.0650041	-0.167988	0.837	0.602472	0.43	0.18	0.02	7	7		NA	PPP2R5E		KCNH5 PPP2R5E	KCNH5	27133						MCP_1_MCAF	6.60212	6.60212	0.0663577		C	G	0.0207629	0.0207629	388	0.958	0	FALSE	0.224892	0.521255	-0.333041
rs118134305:62926773:A:G	FALSE		14	14q23.2	a452	62926773	rs117846056:62927118:G:C	0.997942	FALSE	KCNH5 (250 kb)	KCNH5:protein_coding(KNOWN)	KCNH5: potassium voltage-gated channel, subfamily H (eag-related), member 5 (250 kb)	-0.237703	-0.20634	1.793	0.299052	0.32	0.1	0.02	7	7		NA	PPP2R5E		KCNH5 PPP2R5E	KCNH5	27133						MCP_1_MCAF	6.56255	6.56255	0.0659343		G	A	0.0210155	0.0210155	388	0.949	0	FALSE	0.227545	0.52464	-0.334702
rs199676757:62917239:T:TA	FALSE		14	14q23.2	a452	62917239	rs199676757:62917239:T:TA	1	TRUE						0.503					6	6		NA	PPP2R5E		PPP2R5E								MCP_1_MCAF	6.43542	6.43542	0.0645702		TA	T	0.0237293	0.0237293	388	0.994	0	FALSE	0.2613	0.565829	-0.142174
rs149090477:62944121:AT:A	FALSE		14	14q23.2	a452	62944121	rs149090477:62944121:AT:A	1	TRUE	KCNH5 (230 kb)	KCNH5:protein_coding(KNOWN)	KCNH5: potassium voltage-gated channel, subfamily H (eag-related), member 5 (230 kb)											NA	PPP2R5E		KCNH5 PPP2R5E	KCNH5	27133						IL_6	6.36514	6.36514	0.0641359		A	AT	0.0155388	0.0155388	386	0.993	0	FALSE	0.334646	0.517918	-0.770185
rs114631516:62931495:C:A	FALSE		14	14q23.2	a452	62931495	rs149090477:62944121:AT:A	0.990094	FALSE	KCNH5 (240 kb)	KCNH5:protein_coding(KNOWN)	KCNH5: potassium voltage-gated channel, subfamily H (eag-related), member 5 (240 kb)	-0.281615	-0.222717	1.669	0.562065	0.33	0.12	0.05	7	7		NA	PPP2R5E		KCNH5 PPP2R5E	KCNH5	27133						IL_6	6.3541	6.3541	0.0640166		A	C	0.0149366	0.0149366	386	0.969	0	FALSE	0.354672	0.536868	-0.822185
rs17099956:62939164:C:T	FALSE		14	14q23.2	a452	62939164	rs149090477:62944121:AT:A	0.999132	FALSE	KCNH5 (230 kb)	KCNH5:protein_coding(KNOWN)	KCNH5: potassium voltage-gated channel, subfamily H (eag-related), member 5 (230 kb)	0.138688	-0.152943	1.684	0.444227	0.34	0.19	0.02	7	7	Chromatin_Structure|FAIRE|Htr8|	NA	PPP2R5E		KCNH5 PPP2R5E	KCNH5	27133						IL_6	6.31551	6.31551	0.0636003		T	C	0.0154067	0.0154067	386	0.99	0	FALSE	0.337293	0.519797	-0.789481
rs116899556:62938441:A:G	FALSE		14	14q23.2	a452	62938441	rs149090477:62944121:AT:A	0.998841	FALSE	KCNH5 (230 kb)	KCNH5:protein_coding(KNOWN)	KCNH5: potassium voltage-gated channel, subfamily H (eag-related), member 5 (230 kb)	0.152569	-0.151849	3.463	0.400959	0.22	0.15	0.01	6	6		NA	PPP2R5E		KCNH5 PPP2R5E	KCNH5	27133						IL_6	6.30688	6.30688	0.0635072		G	A	0.015386	0.015386	386	0.99	0	FALSE	0.337664	0.52001	-0.792383
rs138522980:62921385:G:A	FALSE		14	14q23.2	a452	62921385	rs199676757:62917239:T:TA	0.978525	FALSE				0.208777	-0.147296	5.188	0.63669	0.33	0.17	0.03	7	7		NA	PPP2R5E		PPP2R5E								MCP_1_MCAF	6.20972	6.20972	0.0621462		A	G	0.0248415	0.0248415	388	0.978	0	FALSE	0.2682	0.486303	-0.22774
rs143051414:62921383:T:G	FALSE		14	14q23.2	a452	62921383	rs199676757:62917239:T:TA	0.978542	FALSE				-0.293032	-0.220543	0.669	0.531797	0.34	0.13	0.08	7	7		NA	PPP2R5E		PPP2R5E								MCP_1_MCAF	6.20914	6.20914	0.0621401		G	T	0.0248401	0.0248401	388	0.978	0	FALSE	0.268186	0.486267	-0.227785
rs117615312:62925516:C:T	FALSE		14	14q23.2	a452	62925516	rs117615312:62925516:C:T	1	TRUE	KCNH5 (250 kb)	KCNH5:protein_coding(KNOWN)	KCNH5: potassium voltage-gated channel, subfamily H (eag-related), member 5 (250 kb)	-0.288223	-0.215307	1.042	0.533937	0.33	0.15	0.01	5	5		NA	PPP2R5E		KCNH5 PPP2R5E	KCNH5	27133						MCP_1_MCAF	6.19492	6.19492	0.0619866		T	C	0.02592	0.02592	388	0.952	0	FALSE	0.254836	0.416229	-0.221405
rs145515967:62940006:C:T	FALSE		14	14q23.2	a452	62940006	rs117846056:62927118:G:C	0.971735	FALSE	KCNH5 (230 kb)	KCNH5:protein_coding(KNOWN)	KCNH5: potassium voltage-gated channel, subfamily H (eag-related), member 5 (230 kb)	-0.448416	-0.209023	2.338	0.667769	0.24	0.11	0.03	7	7		NA	PPP2R5E		KCNH5 PPP2R5E	KCNH5	27133						MCP_1_MCAF	6.17554	6.17554	0.061779		T	C	0.0214305	0.0214305	388	0.983	0	FALSE	0.217018	0.521833	-0.341725
rs73261391:62922292:A:G	FALSE		14	14q23.2	a452	62922292	rs199676757:62917239:T:TA	0.975843	FALSE				-0.179816	-0.204585	5.606	0.810909	0.29	0.15	0.1	5	5	Chromatin_Structure|FAIRE|Htr8|, Chromatin_Structure|DNase-seq|Gm04503|, Chromatin_Structure|DNase-seq|Hae|, Chromatin_Structure|DNase-seq|Hasp|, Chromatin_Structure|DNase-seq|Hee|, Chromatin_Structure|DNase-seq|Hipe|, Chromatin_Structure|DNase-seq|Gm04504|, Chromatin_Structure|DNase-seq|Saec|, Chromatin_Structure|DNase-seq|Hnpce|, Chromatin_Structure|DNase-seq|Hcf|, Chromatin_Structure|DNase-seq…	NA	PPP2R5E		PPP2R5E								MCP_1_MCAF	6.16614	6.16614	0.0616775		G	A	0.0250373	0.0250373	388	0.97	0	FALSE	0.266374	0.485826	-0.235299
rs148790463:62897396:G:A	FALSE		14	14q23.2	a452	62897396	rs148790463:62897396:G:A	1	TRUE				-0.059934	-0.182738	2.352	0.474622	0.42	0.16	0.03	7	7		NA	PPP2R5E		PPP2R5E								MCP_1_MCAF	6.15936	6.15936	0.0616052		A	G	0.0172925	0.0172925	388	0.985	0	FALSE	0.397923	0.616865	-0.477284
rs199980127:62910949:CAAG:C	FALSE		14	14q23.2	a452	62910949	rs148790463:62897396:G:A	0.999409	FALSE						6.855								NA	PPP2R5E		PPP2R5E								MCP_1_MCAF	6.12273	6.12273	0.0612115		C	CAAG	0.0172732	0.0172732	388	0.993	0	FALSE	0.39785	0.610243	-0.476378
rs138521666:62905377:T:C	FALSE		14	14q23.2	a452	62905377	rs148790463:62897396:G:A	0.999528	FALSE				-0.220686	-0.193573	4.618	0.693904	0.32	0.06	0.01	7	7		NA	PPP2R5E		PPP2R5E								MCP_1_MCAF	6.12085	6.12085	0.0611907		C	T	0.0172952	0.0172952	388	0.993	0	FALSE	0.3977	0.607834	-0.478091
rs139954190:62906881:G:A	FALSE		14	14q23.2	a452	62906881	rs148790463:62897396:G:A	0.999502	FALSE				-0.447348	-0.221836	1.167	0.52243	0.26	0.09	0.04	7	7		NA	PPP2R5E		PPP2R5E								MCP_1_MCAF	6.11948	6.11948	0.0611764		A	G	0.0172964	0.0172964	388	0.994	0	FALSE	0.397688	0.607495	-0.478126
rs73261393:62923188:A:G	FALSE		14	14q23.2	a452	62923188	rs199676757:62917239:T:TA	0.971527	FALSE				-0.105966	-0.185489	3.655	0.811974	0.49	0.14	0.03	7	7		NA	PPP2R5E		PPP2R5E								MCP_1_MCAF	6.11352	6.11352	0.0611114		G	A	0.0252461	0.0252461	388	0.963	0	FALSE	0.264005	0.484561	-0.243069
rs201477437:62945687:G:GTCTT	FALSE		14	14q23.2	a452	62945687	rs117846056:62927118:G:C	0.9392	FALSE	KCNH5 (230 kb)	KCNH5:protein_coding(KNOWN)	KCNH5: potassium voltage-gated channel, subfamily H (eag-related), member 5 (230 kb)			3.885					6	6		NA	PPP2R5E		KCNH5 PPP2R5E	KCNH5	27133						MCP_1_MCAF	6.09345	6.09345	0.0608962		GTCTT	G	0.0209536	0.0209536	388	0.99	0	FALSE	0.227352	0.547999	-0.339413
rs115769021:62924097:C:T	FALSE		14	14q23.2	a452	62924097	rs199676757:62917239:T:TA	0.965926	FALSE	KCNH5 (250 kb)	KCNH5:protein_coding(KNOWN)	KCNH5: potassium voltage-gated channel, subfamily H (eag-related), member 5 (250 kb)	-0.390537	-0.226127	1.301	0.216638	0.38	0.05	0	6	6		NA	PPP2R5E		KCNH5 PPP2R5E	KCNH5	27133						MCP_1_MCAF	6.05648	6.05648	0.0604989		T	C	0.0254471	0.0254471	388	0.96	0	FALSE	0.261372	0.482935	-0.249896
rs118014723:65728820:G:A	FALSE		14	14q23.3	a453	65728820	rs118014723:65728820:G:A	1	TRUE	CTD-2509G16.5 (0 kb, intron/Intron/MODIFIER | nc-RNA/Non coding transcript/MODIFIER); RPL21P7 (4.5 kb, near_gene/Downstream gene/MODIFIER); PTBP1P (17 kb); MIR4708 (73 kb)	CTD-2509G16.5:lincRNA(KNOWN); RPL21P7:pseudogene(KNOWN); PTBP1P:pseudogene(KNOWN); MIR4708:miRNA(KNOWN)	RPL21P7: ribosomal protein L21 pseudogene 7 (4.5 kb)	-0.317221	-0.21342	3.209	0.54004	0.3	0.09	0.04	5	5		NA	AKAP5 | CHURC1 | CHURC1-FNTB | FNTB | FUT8 | GPX2 | MAX | PLEKHG3 | RAB15		AKAP5 CHURC1 CHURC1-FNTB CTD-2509G16.5 FNTB FUT8 GPX2 MAX MIR4706 MIR4708 MIR625 PLEKHG3 PTBP1P RAB15 RNU2-14P RPL21P7 RPL21P8	CTD-2509G16.2, FNTB, FUT8, MAX, MIR4708	100128233, 100529261, 100616176, 2342, 2530, 4149	Small cell lung cancer:MAX | Transcriptional misregulation in cancer:FUT8,MAX	Visual phototransduction:CHURC1-FNTB,FNTB | Inactivation, recovery and regulation of the phototransduction cascade:CHURC1-FNTB,FNTB | The phototransduction cascade:CHURC1-FNTB,FNTB | G alpha (i) signalling events:CHURC1-FNTB,FNTB | Mitotic G1-G1/S phases:MAX		integrin-mediated signaling pathway:FUT8 | cellular response to peptide hormone stimulus:MAX | glycoprotein biosynthetic process:FUT8 | cellular response to peptide:MAX | glycoprotein metabolic process:FUT8 | response to peptide hormone:MAX | camera-type eye development:MAX | detection of external stimulus:FNTB | detection of abiotic stimulus:FNTB | retina development in camera-type eye:MAX | tra…		IL_10	6.67856	6.67856	0.0673458		A	G	0.0220428	0.0220428	387	0.845	0	FALSE	0.0878123	1.95112	1.01692
rs118008913:39036672:A:G	FALSE		15	15q14	a465	39036672	rs118008913:39036672:A:G	1	TRUE	C15orf53 (44 kb); RASGRP1 (180 kb)	C15orf53:protein_coding(KNOWN); RASGRP1:protein_coding(KNOWN)	C15orf53: chromosome 15 open reading frame 53 (44 kb)	0.177175	-0.135402	6.852	0.58887	0.14	0.19	0.1	7	7		NA			C15orf53 RASGRP1	C15orf53, RASGRP1	10125, 400359	Ras signaling pathway:RASGRP1			regulation of interferon-gamma secretion:RASGRP1 | interferon-gamma secretion:RASGRP1 | positive regulation of cell adhesion:RASGRP1 | positive regulation of Ras protein signal transduction:RASGRP1 | positive regulation of interferon-gamma production:RASGRP1 | positive regulation of small GTPase mediated signal transduction:RASGRP1 | positive regulation of ERK1 and ERK2 cascade:RASGRP1 | regulati…		MIP_1A	7.31825	7.31825	0.0776842		G	A	0.0218712	0.0218712	369	0.94	0	FALSE	0.0682306	0.911643	0.495916
rs114516208:39042376:G:A	FALSE		15	15q14	a465	39042376	rs118008913:39036672:A:G	0.977256	FALSE	C15orf53 (50 kb); RASGRP1 (180 kb)	C15orf53:protein_coding(KNOWN); RASGRP1:protein_coding(KNOWN)	C15orf53: chromosome 15 open reading frame 53 (50 kb)	-0.0319678	-0.180031	3.374	0.581989	0.17	0.18	0.05	7	7		NA			C15orf53 RASGRP1	C15orf53, RASGRP1	10125, 400359	Ras signaling pathway:RASGRP1			regulation of interferon-gamma secretion:RASGRP1 | interferon-gamma secretion:RASGRP1 | positive regulation of cell adhesion:RASGRP1 | positive regulation of Ras protein signal transduction:RASGRP1 | positive regulation of interferon-gamma production:RASGRP1 | positive regulation of small GTPase mediated signal transduction:RASGRP1 | positive regulation of ERK1 and ERK2 cascade:RASGRP1 | regulati…		MIP_1A	7.12579	7.12579	0.0755322		A	G	0.0225435	0.0225435	369	0.948	0	FALSE	0.0626356	0.915692	0.526307
15:85729457:A:G	FALSE		15	15q25.3	a475	85729457	15:85729457:A:G	1	TRUE	NIFKP8 (4.1 kb, near_gene/Upstream gene/MODIFIER); CSPG4P12 (5.2 kb); RN7SL428P (24 kb); PDE8A (47 kb)	NIFKP8:pseudogene(KNOWN); CSPG4P12:pseudogene(KNOWN); RN7SL428P:misc_RNA(KNOWN); PDE8A:protein_coding(KNOWN)	NIFKP8: nucleolar protein interacting with the FHA domain of MKI67 pseudogene 8 (4.1 kb)	-0.163078	-0.164015		0.765017							NA	AKAP13 | RP11-158M2.3		ADAMTS7P4 AKAP13 CSPG4P12 GOLGA6L3 NIFKP8 PDE8A RN7SL428P RNU6-339P RNU6-796P RNU7-79P RP11-158M2.3 SLC28A1	AKAP13, CSPG4P12, PDE8A, RP11-561C5.4	101929479, 11214, 440300, 5151, 642423	Morphine addiction:PDE8A | Purine metabolism:PDE8A | Parathyroid hormone synthesis, secretion and action:AKAP13			cyclic nucleotide catabolic process:PDE8A | cAMP metabolic process:PDE8A | purine ribonucleotide catabolic process:PDE8A | ribonucleotide catabolic process:PDE8A | cyclic nucleotide metabolic process:PDE8A | purine nucleotide catabolic process:PDE8A | purine-containing compound catabolic process:PDE8A | nucleotide catabolic process:PDE8A | nucleoside phosphate catabolic process:PDE8A | nucleobase…	Tissues; Epithelium:GOLGA2P7	MIP_1A	6.28595	6.28595	0.0661032		G	A	0.0117182	0.0117182	369	0.81	0	FALSE	0.260659	1.02062	1.23875
rs142597847:86601194:G:A	FALSE		15	15q25.3	a475	86601194	rs142597847:86601194:G:A	1	TRUE	RNA5SP400 (80 kb); AGBL1 (84 kb); MIR548AP (230 kb); RNU6-231P (240 kb)	RNA5SP400:rRNA(KNOWN); AGBL1:protein_coding(KNOWN); MIR548AP:miRNA(KNOWN); RNU6-231P:snRNA(KNOWN)	RNA5SP400: RNA, 5S ribosomal pseudogene 400 (80 kb)	-0.595336	-0.261887	0.681	0.429174	0.25	0.05	0.02	7	7		NA	KLHL25		AGBL1 AGBL1-AS1 KLHL25 MIR548AP RNA5SP400 RNU6-231P	AGBL1, AGBL1-AS1, MIR548AP, RP11-553E24.2	100847084, 101929701, 123624, 727915						MIP_1A	6.23064	6.23064	0.0654803		A	G	0.0150514	0.0150514	369	0.826	0	FALSE	0.0106634	0.489711	0.877328
rs35193579:93598440:G:A	FALSE		15	15q26.1	a477	93598440	rs35193579:93598440:G:A	1	TRUE	RGMA (0 kb, intron/NMD transcript/MODIFIER | intron/Intron/MODIFIER | nc-RNA/Non coding transcript/MODIFIER); CHD2 (27 kb); MIR3175 (150 kb); RN7SL599P (200 kb)	RGMA:protein_coding(KNOWN); CHD2:protein_coding(KNOWN); MIR3175:miRNA(KNOWN); RN7SL599P:misc_RNA(KNOWN)	RGMA: repulsive guidance molecule family member a (0 kb)	0.0569761	0.0265912	3.997	0.795667	0.25	0.19	0.15	5	5	Chromatin_Structure|DNase-seq|Huh7|, Chromatin_Structure|DNase-seq|Huh75|, Chromatin_Structure|DNase-seq|Medullo|, Chromatin_Structure|DNase-seq|K562|Znfa41c6, Chromatin_Structure|DNase-seq|K562|, Chromatin_Structure|DNase-seq|Th1|, Chromatin_Structure|DNase-seq|Helas3|Ifna4h, Chromatin_Structure|DNase-seq|Helas3|, Chromatin_Structure|DNase-seq|Hepatocytes|, Chromatin_Structure|DNase-seq|Osteobl|	NA			CHD2 FAM174B MIR3175 RGMA RN7SL599P	AC013394.2, CHD2, MIR3175, RGMA	100422995, 100507217, 1106, 56963	Axon guidance:RGMA	Netrin-1 signaling:RGMA		DNA duplex unwinding:CHD2 | DNA geometric change:CHD2 | regulation of neuron projection development:RGMA | stem cell differentiation:CHD2 | muscle organ development:CHD2 | DNA conformation change:CHD2 | negative regulation of cell development:RGMA | hematopoietic stem cell differentiation:CHD2		IL_1B	7.2688	7.2688	0.0787751		A	G	0.271468	0.271468	361	1	2	FALSE	0.0493097	0.337253	0.151463
rs936674:93903597:A:G	FALSE		15	15q26.1	a477	93903597	rs936674:93903597:A:G	1	TRUE	RP11-266O8.1 (0 kb, intron/Intron/MODIFIER | nc-RNA/Non coding transcript/MODIFIER)	RP11-266O8.1:lincRNA(KNOWN)		-0.126456	-0.191865	2.617	0.516062	0.12	0.27	0.19	7	7		NA	RP11-763K15.1	NXT1	NXT1 RP11-266O8.1 RP11-763K15.1	RP11-164C12.2	100996663						MCP_1_MCAF	6.17033	6.17033	0.0617225		A	G	0.0128841	0.0128841	388	0.987	0	FALSE	0.470041	0.525741	-0.142484
rs936673:93903034:C:G	FALSE		15	15q26.1	a477	93903034	rs936674:93903597:A:G	0.999999	FALSE	RP11-266O8.1 (0 kb, intron/Intron/MODIFIER | nc-RNA/Non coding transcript/MODIFIER)	RP11-266O8.1:lincRNA(KNOWN)		-0.191818	-0.190883	3.888	0.356853	0.17	0.28	0.26	5	5	Chromatin_Structure|DNase-seq|Urotsa|, Chromatin_Structure|DNase-seq|UrotsaUt189|, Chromatin_Structure|DNase-seq|Mcf7|, Chromatin_Structure|DNase-seq|Gm19238|, Chromatin_Structure|DNase-seq|Hsmm|, Chromatin_Structure|DNase-seq|Hsmmt|, Chromatin_Structure|DNase-seq|Mcf7|Hypoxlac	NA	RP11-763K15.1	NXT1	NXT1 RP11-266O8.1 RP11-763K15.1	RP11-164C12.2	100996663						MCP_1_MCAF	6.16615	6.16615	0.061678		C	G	0.0128866	0.0128866	388	0.993	0	FALSE	0.469597	0.525209	-0.142722
rs79430003:47031830:G:A	FALSE		16	16q12.1	a488	47031830	rs79430003:47031830:G:A	1	TRUE	DNAJA2 (24 kb); GPT2 (67 kb); NETO2 (80 kb); RPL23AP72 (150 kb)	DNAJA2:protein_coding(KNOWN); GPT2:protein_coding(KNOWN); NETO2:protein_coding(KNOWN); RPL23AP72:pseudogene(KNOWN)	DNAJA2: DnaJ (Hsp40) homolog, subfamily A, member 2 (24 kb)	-0.299049	-0.210353	4.91	0.438335	0.32	0.22	0.03	7	7	7:Chromatin_Structure|FAIRE|K562|Ohurea;7:NA	NA	DNAJA2		C16orf87 CKBP1 DJA2 DNAJA2 GPT2 ITFG1 MYLK3 NETO2 RPL23AP72	DNAJA2, GPT2, NETO2, RP11-329J18.2	101927102, 10294, 81831, 84706				positive regulation of ATPase activity:DNAJA2		IL_1B	6.9922	6.9922	0.0756155		A	G	0.012536	0.012536	361	0.923	0	FALSE	0.182656	0.495389	0.772756
rs35817157:79262392:G:C	FALSE		16	16q23.2	a495	79262392	rs35817157:79262392:G:C	1	TRUE	RP11-679B19.2 (0 kb, intron/Intron/MODIFIER | nc-RNA/Non coding transcript/MODIFIER); WWOX (16 kb); RNA5SP431 (36 kb)	RP11-679B19.2:lincRNA(KNOWN); WWOX:protein_coding(KNOWN); RNA5SP431:rRNA(KNOWN)	WWOX: WW domain containing oxidoreductase (16 kb)	-0.00933651	-0.176428	1.023	0.671195	0.35	0.44	0.22	7	7		NA			RNA5SP431 RP11-679B19.2 WWOX	WWOX	51741			non-small cell lung carcinoma:WWOX | bile duct adenocarcinoma:WWOX | cholangiocarcinoma:WWOX | bile duct cancer:WWOX | bile duct carcinoma:WWOX	positive regulation of extrinsic apoptotic signaling pathway:WWOX | skeletal system morphogenesis:WWOX		IL_1B	6.99305	6.99305	0.0756253		C	G	0.0199675	0.0199675	361	0.922	0	FALSE	0.482529	1.25484	1.04685
rs117439842:45933872:G:T	FALSE	EXTRACT: IL_10-> || low maf // MCP_1_MCAF-> || low maf // VEGF-> || low maf // VCAM_1-> || low maf // ICAM_1-> || low maf; TOPLIST: IL_10-> || low maf || toplist low maf // MCP_1_MCAF-> || low maf || toplist low maf // VEGF-> || low maf || toplist low maf // VCAM_1-> || low maf || toplist low maf // ICAM_1-> || low maf || toplist low maf	17	17q21.32	a507	45933872	rs117439842:45933872:G:T	1	TRUE	SP6 (0.63 kb, near_gene/Upstream gene/MODIFIER); SCRN2 (15 kb); LRRC46 (19 kb); MRPL10 (25 kb); OSBPL7 (35 kb); SP2 (40 kb)	SP6:protein_coding(KNOWN); SCRN2:protein_coding(KNOWN); LRRC46:protein_coding(KNOWN); MRPL10:protein_coding(KNOWN); OSBPL7:protein_coding(KNOWN); SP2:protein_coding(KNOWN)	SP6: Sp6 transcription factor (0.63 kb)	-0.0779692	-0.136328	1.314	0.616345	0.43	0.6	0.75	6	6		NA	CDK5RAP3 | HOXB2 | MRPL10 | NPEPPS | RP11-6N17.3 | SCRN2 | SKAP1 | UBE2Z		CBX1 CDK5RAP3 COPZ2 HOXB2 KPNB1 LRRC46 MIR152 MRPL10 NFE2L1 NPEPPS OSBPL7 PNPO PRR15L RNU6-1201P RP11-6N17.3 SCRN2 SKAP1 SNX11 SP2 SP6 TBKBP1 TBX21 UBE2Z	AC003665.1, CDK5RAP3, LRRC46, MRPL10, OSBPL7, RP11-6N17.1, RP11-6N17.4, SCRN2, SKAP1, SP2, SP6	100506325, 101927122, 114881, 124995, 6668, 80279, 80320, 8631, 90506, 90507	Ribosome:MRPL10	Mitochondrial translation initiation:MRPL10 | Mitochondrial translation elongation:MRPL10 | Mitochondrial translation termination:MRPL10 | Mitochondrial translation:MRPL10	non-small cell lung carcinoma:CDK5RAP3	positive regulation of cell-matrix adhesion:SKAP1 | negative regulation of protein phosphorylation:CDK5RAP3 | regulation of cell-matrix adhesion:SKAP1 | positive regulation of cell-substrate adhesion:SKAP1 | regulation of cell-substrate adhesion:SKAP1 | negative regulation of phosphorylation:CDK5RAP3 | negative regulation of protein kinase activity:CDK5RAP3 | regulation of cellular protein catabo…		IL_1B	8.82155	8.82155	0.0963756		T	G	0.0106852	0.0106852	361	0.91	0	FALSE	-0.0455748	1.82783	1.22772
rs149736761:45914017:G:A	FALSE	EXTRACT: IL_10-> || low maf // IL_12-> || low maf // IL_6-> || low maf // MCP_1_MCAF-> || low maf // VEGF-> || low maf // VCAM_1-> || low maf // ICAM_1-> || low maf // IL_8-> || low maf; TOPLIST: IL_10-> || low maf || toplist low maf // IL_12-> || low maf || toplist low maf // IL_6-> || low maf || toplist low maf // MCP_1_MCAF-> || low maf || toplist low maf // VEGF-> || low maf || toplist low ma…	17	17q21.32	a507	45914017	rs117439842:45933872:G:T	0.9951	FALSE	LRRC46 (0 kb, intron/NMD transcript/MODIFIER | intron/Intron/MODIFIER | near_gene/Downstream gene/MODIFIER); SCRN2 (1 kb, near_gene/Downstream gene/MODIFIER); MRPL10 (5.1 kb); SP6 (8.3 kb); OSBPL7 (15 kb)	LRRC46:protein_coding(KNOWN); SCRN2:protein_coding(KNOWN); MRPL10:protein_coding(KNOWN); SP6:protein_coding(KNOWN); OSBPL7:protein_coding(KNOWN)	LRRC46: leucine rich repeat containing 46 (0 kb)	0.17445	-0.138448	5.599	0.416713	0.24	0.22	0.36	5	5	Motifs|PWM|Zfp187|, Chromatin_Structure|DNase-seq|8988t|, Chromatin_Structure|DNase-seq|H7es|	NA	CDK5RAP3 | HOXB2 | MRPL10 | NPEPPS | RP11-6N17.3 | SCRN2 | SKAP1 | UBE2Z		CBX1 CDK5RAP3 COPZ2 HOXB2 KPNB1 LRRC46 MIR152 MRPL10 NFE2L1 NPEPPS OSBPL7 PNPO PRR15L RP11-6N17.3 SCRN2 SKAP1 SP2 SP6 TBKBP1 TBX21 UBE2Z	CDK5RAP3, LRRC46, MRPL10, OSBPL7, RP11-6N17.1, SCRN2, SKAP1, SP6	101927122, 114881, 124995, 80279, 80320, 8631, 90506, 90507	Ribosome:MRPL10	Mitochondrial translation initiation:MRPL10 | Mitochondrial translation elongation:MRPL10 | Mitochondrial translation termination:MRPL10 | Mitochondrial translation:MRPL10	non-small cell lung carcinoma:CDK5RAP3	positive regulation of cell-matrix adhesion:SKAP1 | negative regulation of protein phosphorylation:CDK5RAP3 | regulation of cell-matrix adhesion:SKAP1 | positive regulation of cell-substrate adhesion:SKAP1 | regulation of cell-substrate adhesion:SKAP1 | negative regulation of phosphorylation:CDK5RAP3 | negative regulation of protein kinase activity:CDK5RAP3 | regulation of cellular protein catabo…		IL_1B	8.78982	8.78982	0.0960189		A	G	0.0104529	0.0104529	361	0.92	0	FALSE	-0.0441285	1.80278	1.20503
rs9903904:45929169:C:T	FALSE		17	17q21.32	a507	45929169	rs9903904:45929169:C:T	1	TRUE	SP6 (0 kb, intron/Intron/MODIFIER | near_gene/Upstream gene/MODIFIER); SCRN2 (10 kb); LRRC46 (14 kb); MRPL10 (20 kb); OSBPL7 (30 kb); SP2 (44 kb)	SP6:protein_coding(KNOWN); SCRN2:protein_coding(KNOWN); LRRC46:protein_coding(KNOWN); MRPL10:protein_coding(KNOWN); OSBPL7:protein_coding(KNOWN); SP2:protein_coding(KNOWN)	SP6: Sp6 transcription factor (0 kb)	0.416627	3.27486	7.62	0.591716	0.39	0.56	0.88	2b	2	Motifs|Footprinting|ATF5|Huh7, Motifs|Footprinting|ATF5|Gm12892, Motifs|Footprinting|ATF5|Gm12891, Motifs|Footprinting|ATF5|8988t, Motifs|Footprinting|ATF5|H1hesc, Motifs|Footprinting|ATF5|Lncap, Motifs|PWM|ATF5|, Chromatin_Structure|DNase-seq|8988t|, Chromatin_Structure|DNase-seq|Gm12892|, Chromatin_Structure|DNase-seq|Lncap|, Chromatin_Structure|DNase-seq|Medullo|, Chromatin_Structure|DNase-seq…	0.882 Alzheimer's disease (cognitive decline)	ATP5G1 | CDK5RAP3 | COPZ2 | EFCAB13 | GOSR2 | HOXB2 | HOXB3 | HOXB4 | ITGB3 | LRRC46 | MIR10A | MRPL10 | MRPL45P2 | MYL4 | NFE2L1 | NPEPPS | OSBPL7 | PNPO | PRR15L | RP11-6N17.2 | RP11-6N17.3 | RP11-6N17.4 | SCRN2 | SKAP1 | SNX11 | SP2 | SP6 | TBKBP1 | TBX21		ATP5G1 CBX1 CDK5RAP3 COPZ2 EFCAB13 GOSR2 HOXB2 HOXB3 HOXB4 ITGB3 KPNB1 LRRC46 MIR10A MIR152 MRPL10 MRPL45P2 MYL4 NFE2L1 NPEPPS OSBPL7 PNPO PRR15L RNU6-1201P RP11-6N17.2 RP11-6N17.3 RP11-6N17.4 SCRN2 SKAP1 SNX11 SP2 SP6 TBKBP1 TBX21	AC003665.1, ATP5G1, CDK5RAP3, EFCAB13, HOXB2, LRRC46, MRPL10, MRPL45P2, MYL4, NFE2L1, OSBPL7, PNPO, RP11-6N17.1, RP11-6N17.4, SCRN2, SKAP1, SNX11, SP2, SP6, TBKBP1	100506325, 101927122, 114881, 124989, 124995, 29916, 3212, 4635, 4779, 516, 55163, 653479, 6668, 80279, 80320, 8631, 90506, 90507, 9755	Ribosome:MRPL10	Mitochondrial translation initiation:MRPL10 | Mitochondrial translation elongation:MRPL10 | Mitochondrial translation termination:MRPL10 | Mitochondrial translation:MRPL10	non-small cell lung carcinoma:CDK5RAP3	positive regulation of cell-matrix adhesion:SKAP1 | negative regulation of protein phosphorylation:CDK5RAP3 | regulation of cell-matrix adhesion:SKAP1 | positive regulation of cell-substrate adhesion:SKAP1 | regulation of cell-substrate adhesion:SKAP1 | negative regulation of phosphorylation:CDK5RAP3 | negative regulation of protein kinase activity:CDK5RAP3 | regulation of cellular protein catabo…		IL_1B	8.53292	8.53292	0.0931222		T	C	0.122226	0.122226	361	0.986	0	FALSE	0.0483668	0.341554	0.163439
rs2074185:45930584:G:A	FALSE		17	17q21.32	a507	45930584	rs9903904:45929169:C:T	0.901143	FALSE	SP6 (0 kb, intron/Intron/MODIFIER | near_gene/Upstream gene/MODIFIER); SCRN2 (12 kb); LRRC46 (16 kb); MRPL10 (22 kb); OSBPL7 (31 kb); SP2 (43 kb)	SP6:protein_coding(KNOWN); SCRN2:protein_coding(KNOWN); LRRC46:protein_coding(KNOWN); MRPL10:protein_coding(KNOWN); OSBPL7:protein_coding(KNOWN); SP2:protein_coding(KNOWN)	SP6: Sp6 transcription factor (0 kb)	-0.0998538	-0.0529381	2.43	0.560642	0.2	0.48	0.53	4	4	Motifs|Footprinting||NHEK, Chromatin_Structure|DNase-seq|Medullo|, Chromatin_Structure|DNase-seq|Medullod341|, Chromatin_Structure|DNase-seq|Hepatocytes|, Chromatin_Structure|DNase-seq|A549|, Chromatin_Structure|DNase-seq|Frontalcortexoc|, Chromatin_Structure|DNase-seq|Heartoc|, Chromatin_Structure|DNase-seq|Psoasmuscleoc|, Protein_Binding|ChIP-seq|EZH2|NHDF-Ad|, Protein_Binding|ChIP-seq|EZH2|NHD…	0.993 Alzheimer's disease (cognitive decline)	ATP5G1 | CDK5RAP3 | COPZ2 | EFCAB13 | GOSR2 | HOXB2 | HOXB3 | HOXB4 | ITGB3 | LRRC46 | MIR10A | MRPL10 | MRPL45P2 | MYL4 | NFE2L1 | NPEPPS | OSBPL7 | PNPO | PRR15L | RP11-6N17.2 | RP11-6N17.3 | RP11-6N17.4 | SCRN2 | SKAP1 | SNX11 | SP2 | SP6 | TBKBP1 | TBX21		ATP5G1 CBX1 CDK5RAP3 COPZ2 EFCAB13 GOSR2 HOXB2 HOXB3 HOXB4 ITGB3 KPNB1 LRRC46 MIR10A MIR152 MRPL10 MRPL45P2 MYL4 NFE2L1 NPEPPS OSBPL7 PNPO PRR15L RNU6-1201P RP11-6N17.2 RP11-6N17.3 RP11-6N17.4 SCRN2 SKAP1 SNX11 SP2 SP6 TBKBP1 TBX21	AC003665.1, ATP5G1, CDK5RAP3, EFCAB13, HOXB2, LRRC46, MRPL10, MRPL45P2, MYL4, NFE2L1, OSBPL7, PNPO, RP11-6N17.1, RP11-6N17.4, SCRN2, SKAP1, SNX11, SP2, SP6, TBKBP1	100506325, 101927122, 114881, 124989, 124995, 29916, 3212, 4635, 4779, 516, 55163, 653479, 6668, 80279, 80320, 8631, 90506, 90507, 9755	Ribosome:MRPL10	Mitochondrial translation initiation:MRPL10 | Mitochondrial translation elongation:MRPL10 | Mitochondrial translation termination:MRPL10 | Mitochondrial translation:MRPL10	non-small cell lung carcinoma:CDK5RAP3	positive regulation of cell-matrix adhesion:SKAP1 | negative regulation of protein phosphorylation:CDK5RAP3 | regulation of cell-matrix adhesion:SKAP1 | positive regulation of cell-substrate adhesion:SKAP1 | regulation of cell-substrate adhesion:SKAP1 | negative regulation of phosphorylation:CDK5RAP3 | negative regulation of protein kinase activity:CDK5RAP3 | regulation of cellular protein catabo…		IL_1B	8.32594	8.32594	0.090784		A	G	0.123624	0.123624	361	0.969	0	FALSE	0.019845	0.362485	0.161006
rs4794202:45930539:G:T	FALSE		17	17q21.32	a507	45930539	rs9903904:45929169:C:T	0.901312	FALSE	SP6 (0 kb, intron/Intron/MODIFIER | near_gene/Upstream gene/MODIFIER); SCRN2 (12 kb); LRRC46 (15 kb); MRPL10 (22 kb); OSBPL7 (31 kb); SP2 (43 kb)	SP6:protein_coding(KNOWN); SCRN2:protein_coding(KNOWN); LRRC46:protein_coding(KNOWN); MRPL10:protein_coding(KNOWN); OSBPL7:protein_coding(KNOWN); SP2:protein_coding(KNOWN)	SP6: Sp6 transcription factor (0 kb)	0.135945	-0.0277195	4.63	0.695179	0.33	0.58	0.69	4	4	Chromatin_Structure|DNase-seq|Medullo|, Chromatin_Structure|DNase-seq|Medullod341|, Chromatin_Structure|DNase-seq|Hepatocytes|, Chromatin_Structure|DNase-seq|A549|, Chromatin_Structure|FAIRE|K562|, Chromatin_Structure|DNase-seq|Frontalcortexoc|, Chromatin_Structure|DNase-seq|Heartoc|, Protein_Binding|ChIP-seq|EZH2|NHDF-Ad|, Protein_Binding|ChIP-seq|EZH2|NHDF-Ad|	1 Alzheimer's disease (cognitive decline)	ATP5G1 | CDK5RAP3 | COPZ2 | EFCAB13 | GOSR2 | HOXB2 | HOXB3 | HOXB4 | ITGB3 | LRRC46 | MIR10A | MRPL10 | MRPL45P2 | MYL4 | NFE2L1 | NPEPPS | OSBPL7 | PNPO | PRR15L | RP11-6N17.2 | RP11-6N17.3 | RP11-6N17.4 | SCRN2 | SKAP1 | SNX11 | SP2 | SP6 | TBKBP1 | TBX21		ATP5G1 CBX1 CDK5RAP3 COPZ2 EFCAB13 GOSR2 HOXB2 HOXB3 HOXB4 ITGB3 KPNB1 LRRC46 MIR10A MIR152 MRPL10 MRPL45P2 MYL4 NFE2L1 NPEPPS OSBPL7 PNPO PRR15L RNU6-1201P RP11-6N17.2 RP11-6N17.3 RP11-6N17.4 SCRN2 SKAP1 SNX11 SP2 SP6 TBKBP1 TBX21	AC003665.1, ATP5G1, CDK5RAP3, EFCAB13, HOXB2, LRRC46, MRPL10, MRPL45P2, MYL4, NFE2L1, OSBPL7, PNPO, RP11-6N17.1, RP11-6N17.4, SCRN2, SKAP1, SNX11, SP2, SP6, TBKBP1	100506325, 101927122, 114881, 124989, 124995, 29916, 3212, 4635, 4779, 516, 55163, 653479, 6668, 80279, 80320, 8631, 90506, 90507, 9755	Ribosome:MRPL10	Mitochondrial translation initiation:MRPL10 | Mitochondrial translation elongation:MRPL10 | Mitochondrial translation termination:MRPL10 | Mitochondrial translation:MRPL10	non-small cell lung carcinoma:CDK5RAP3	positive regulation of cell-matrix adhesion:SKAP1 | negative regulation of protein phosphorylation:CDK5RAP3 | regulation of cell-matrix adhesion:SKAP1 | positive regulation of cell-substrate adhesion:SKAP1 | regulation of cell-substrate adhesion:SKAP1 | negative regulation of phosphorylation:CDK5RAP3 | negative regulation of protein kinase activity:CDK5RAP3 | regulation of cellular protein catabo…		IL_1B	8.3034	8.3034	0.0905292		T	G	0.123782	0.123782	361	0.969	0	FALSE	0.0196994	0.35984	0.157788
rs11079797:45912302:C:T	FALSE		17	17q21.32	a507	45912302	rs9903904:45929169:C:T	0.991419	FALSE	LRRC46 (0 kb, 3'utr/3 prime UTR/MODIFIER | nc-exon/Non coding transcript exon/MODIFIER | intron/NMD transcript/MODIFIER | intron/Intron/MODIFIER | nc-RNA/Non coding transcript/MODIFIER); SCRN2 (2.8 kb, near_gene/Downstream gene/MODIFIER); MRPL10 (3.4 kb, near_gene/Upstream gene/MODIFIER); SP6 (10 kb); OSBPL7 (13 kb)	LRRC46:protein_coding(KNOWN); SCRN2:protein_coding(KNOWN); MRPL10:protein_coding(KNOWN); SP6:protein_coding(KNOWN); OSBPL7:protein_coding(KNOWN)	LRRC46: leucine rich repeat containing 46 (0 kb)	0.0549776	-0.107179	5.003	0.695151	0.44	0.34	0.56	5	5	Chromatin_Structure|DNase-seq|Hmveclbl|, Chromatin_Structure|FAIRE|Huvec|, Chromatin_Structure|DNase-seq|Hmvecdneo|, Chromatin_Structure|DNase-seq|Hrgec|, Chromatin_Structure|DNase-seq|Hmvecdlyneo|, Chromatin_Structure|DNase-seq|Huvec|, Chromatin_Structure|DNase-seq|Hmvecdblneo|, Chromatin_Structure|DNase-seq|Hmvecdblad|	0.862 Alzheimer's disease (cognitive decline)	ATP5G1 | CDK5RAP3 | COPZ2 | EFCAB13 | GOSR2 | HOXB2 | HOXB3 | HOXB4 | ITGB3 | LRRC46 | MIR10A | MRPL10 | MRPL45P2 | MYL4 | NFE2L1 | NPEPPS | OSBPL7 | PNPO | PRR15L | RP11-6N17.2 | RP11-6N17.3 | RP11-6N17.4 | SCRN2 | SKAP1 | SNX11 | SP2 | SP6 | TBKBP1 | TBX21		ATP5G1 CBX1 CDK5RAP3 COPZ2 EFCAB13 GOSR2 HOXB2 HOXB3 HOXB4 ITGB3 KPNB1 LRRC46 MIR10A MIR152 MRPL10 MRPL45P2 MYL4 NFE2L1 NPEPPS OSBPL7 PNPO PRR15L RP11-6N17.2 RP11-6N17.3 RP11-6N17.4 SCRN2 SKAP1 SNX11 SP2 SP6 TBKBP1 TBX21	ATP5G1, CDK5RAP3, EFCAB13, HOXB2, LRRC46, MRPL10, MRPL45P2, MYL4, NFE2L1, OSBPL7, PNPO, RP11-6N17.1, RP11-6N17.4, SCRN2, SKAP1, SNX11, SP2, SP6, TBKBP1	100506325, 101927122, 114881, 124989, 124995, 29916, 3212, 4635, 4779, 516, 55163, 653479, 6668, 80279, 80320, 8631, 90506, 90507, 9755	Ribosome:MRPL10	Mitochondrial translation initiation:MRPL10 | Mitochondrial translation elongation:MRPL10 | Mitochondrial translation termination:MRPL10 | Mitochondrial translation:MRPL10	non-small cell lung carcinoma:CDK5RAP3	positive regulation of cell-matrix adhesion:SKAP1 | negative regulation of protein phosphorylation:CDK5RAP3 | regulation of cell-matrix adhesion:SKAP1 | positive regulation of cell-substrate adhesion:SKAP1 | regulation of cell-substrate adhesion:SKAP1 | negative regulation of phosphorylation:CDK5RAP3 | negative regulation of protein kinase activity:CDK5RAP3 | regulation of cellular protein catabo…		IL_1B	8.30138	8.30138	0.0905061		T	C	0.124654	0.124654	361	1	2	FALSE	0.0592937	0.335602	0.175766
rs59715174:45931413:A:G	FALSE		17	17q21.32	a507	45931413	rs9903904:45929169:C:T	0.900657	FALSE	SP6 (0 kb, intron/Intron/MODIFIER | near_gene/Upstream gene/MODIFIER); SCRN2 (13 kb); LRRC46 (16 kb); MRPL10 (23 kb); OSBPL7 (32 kb); SP2 (42 kb)	SP6:protein_coding(KNOWN); SCRN2:protein_coding(KNOWN); LRRC46:protein_coding(KNOWN); MRPL10:protein_coding(KNOWN); OSBPL7:protein_coding(KNOWN); SP2:protein_coding(KNOWN)	SP6: Sp6 transcription factor (0 kb)	0.0419705	-0.0865878	5.341	0.8001	0.26	0.48	0.41	4	4	Chromatin_Structure|DNase-seq|Osteobl|, Protein_Binding|ChIP-seq|SPI1|K562|	0.986 Alzheimer's disease (cognitive decline)	ATP5G1 | CDK5RAP3 | COPZ2 | EFCAB13 | GOSR2 | HOXB2 | HOXB3 | HOXB4 | ITGB3 | LRRC46 | MIR10A | MRPL10 | MRPL45P2 | MYL4 | NFE2L1 | NPEPPS | OSBPL7 | PNPO | PRR15L | RP11-6N17.2 | RP11-6N17.3 | RP11-6N17.4 | SCRN2 | SKAP1 | SNX11 | SP2 | SP6 | TBKBP1 | TBX21		ATP5G1 CBX1 CDK5RAP3 COPZ2 EFCAB13 GOSR2 HOXB2 HOXB3 HOXB4 ITGB3 KPNB1 LRRC46 MIR10A MIR152 MRPL10 MRPL45P2 MYL4 NFE2L1 NPEPPS OSBPL7 PNPO PRR15L RNU6-1201P RP11-6N17.2 RP11-6N17.3 RP11-6N17.4 SCRN2 SKAP1 SNX11 SP2 SP6 TBKBP1 TBX21	AC003665.1, ATP5G1, CDK5RAP3, EFCAB13, HOXB2, LRRC46, MRPL10, MRPL45P2, MYL4, NFE2L1, OSBPL7, PNPO, RP11-6N17.1, RP11-6N17.4, SCRN2, SKAP1, SNX11, SP2, SP6, TBKBP1	100506325, 101927122, 114881, 124989, 124995, 29916, 3212, 4635, 4779, 516, 55163, 653479, 6668, 80279, 80320, 8631, 90506, 90507, 9755	Ribosome:MRPL10	Mitochondrial translation initiation:MRPL10 | Mitochondrial translation elongation:MRPL10 | Mitochondrial translation termination:MRPL10 | Mitochondrial translation:MRPL10	non-small cell lung carcinoma:CDK5RAP3	positive regulation of cell-matrix adhesion:SKAP1 | negative regulation of protein phosphorylation:CDK5RAP3 | regulation of cell-matrix adhesion:SKAP1 | positive regulation of cell-substrate adhesion:SKAP1 | regulation of cell-substrate adhesion:SKAP1 | negative regulation of phosphorylation:CDK5RAP3 | negative regulation of protein kinase activity:CDK5RAP3 | regulation of cellular protein catabo…		IL_1B	8.01331	8.01331	0.0872438		G	A	0.12501	0.12501	361	0.976	0	FALSE	0.0191506	0.35335	0.162883
rs11651698:45932303:A:T	FALSE		17	17q21.32	a507	45932303	rs9903904:45929169:C:T	0.875047	FALSE	SP6 (0 kb, intron/Intron/MODIFIER | near_gene/Upstream gene/MODIFIER); SCRN2 (14 kb); LRRC46 (17 kb); MRPL10 (23 kb); OSBPL7 (33 kb); SP2 (41 kb)	SP6:protein_coding(KNOWN); SCRN2:protein_coding(KNOWN); LRRC46:protein_coding(KNOWN); MRPL10:protein_coding(KNOWN); OSBPL7:protein_coding(KNOWN); SP2:protein_coding(KNOWN)	SP6: Sp6 transcription factor (0 kb)	-0.123933	-0.188217	0.886	0.547081	0.31	0.46	0.54	7	7		0.917 Alzheimer's disease (cognitive decline)	ATP5G1 | CDK5RAP3 | COPZ2 | EFCAB13 | GOSR2 | HOXB2 | HOXB3 | HOXB4 | ITGB3 | LRRC46 | MIR10A | MRPL10 | MRPL45P2 | MYL4 | NFE2L1 | NPEPPS | OSBPL7 | PNPO | PRR15L | RP11-6N17.2 | RP11-6N17.3 | RP11-6N17.4 | SCRN2 | SKAP1 | SNX11 | SP2 | SP6 | TBKBP1 | TBX21		ATP5G1 CBX1 CDK5RAP3 COPZ2 EFCAB13 GOSR2 HOXB2 HOXB3 HOXB4 ITGB3 KPNB1 LRRC46 MIR10A MIR152 MRPL10 MRPL45P2 MYL4 NFE2L1 NPEPPS OSBPL7 PNPO PRR15L RNU6-1201P RP11-6N17.2 RP11-6N17.3 RP11-6N17.4 SCRN2 SKAP1 SNX11 SP2 SP6 TBKBP1 TBX21	AC003665.1, ATP5G1, CDK5RAP3, EFCAB13, HOXB2, LRRC46, MRPL10, MRPL45P2, MYL4, NFE2L1, OSBPL7, PNPO, RP11-6N17.1, RP11-6N17.4, SCRN2, SKAP1, SNX11, SP2, SP6, TBKBP1	100506325, 101927122, 114881, 124989, 124995, 29916, 3212, 4635, 4779, 516, 55163, 653479, 6668, 80279, 80320, 8631, 90506, 90507, 9755	Ribosome:MRPL10	Mitochondrial translation initiation:MRPL10 | Mitochondrial translation elongation:MRPL10 | Mitochondrial translation termination:MRPL10 | Mitochondrial translation:MRPL10	non-small cell lung carcinoma:CDK5RAP3	positive regulation of cell-matrix adhesion:SKAP1 | negative regulation of protein phosphorylation:CDK5RAP3 | regulation of cell-matrix adhesion:SKAP1 | positive regulation of cell-substrate adhesion:SKAP1 | regulation of cell-substrate adhesion:SKAP1 | negative regulation of phosphorylation:CDK5RAP3 | negative regulation of protein kinase activity:CDK5RAP3 | regulation of cellular protein catabo…		IL_1B	7.96431	7.96431	0.0866883		T	A	0.127268	0.127268	361	0.97	0	FALSE	0.0181907	0.352118	0.185212
rs9895764:45927961:C:G	FALSE		17	17q21.32	a507	45927961	rs9895764:45927961:C:G	1	TRUE	SP6 (0 kb, intron/Intron/MODIFIER); SCRN2 (9.3 kb); LRRC46 (13 kb); MRPL10 (19 kb); OSBPL7 (29 kb); SP2 (46 kb)	SP6:protein_coding(KNOWN); SCRN2:protein_coding(KNOWN); LRRC46:protein_coding(KNOWN); MRPL10:protein_coding(KNOWN); OSBPL7:protein_coding(KNOWN); SP2:protein_coding(KNOWN)	SP6: Sp6 transcription factor (0 kb)	0.439948	2.33662	4.241	0.472423	0.21	0.38	0.87	4	4	Chromatin_Structure|DNase-seq|Psoasmuscleoc|, Chromatin_Structure|DNase-seq|8988t|, Chromatin_Structure|DNase-seq|Frontalcortexoc|, Chromatin_Structure|DNase-seq|Gm12892|, Chromatin_Structure|DNase-seq|Hmec|, Chromatin_Structure|DNase-seq|Lncap|, Chromatin_Structure|DNase-seq|Medullo|, Chromatin_Structure|DNase-seq|Medullod341|, Chromatin_Structure|DNase-seq|Huh75|, Chromatin_Structure|DNase-seq|…	0.629 Alzheimer's disease (cognitive decline)	ATP5G1 | CDK5RAP3 | COPZ2 | EFCAB13 | GOSR2 | HOXB2 | ITGB3 | LRRC46 | MIR10A | MRPL10 | MRPL45P2 | MYL4 | NFE2L1 | NPEPPS | OSBPL7 | PNPO | RP11-6N17.3 | RP11-6N17.4 | SCRN2 | SKAP1 | SNX11 | SP2 | SP6 | TBKBP1 | TBX21	ATP5G1	ATP5G1 CBX1 CDK5RAP3 COPZ2 EFCAB13 GOSR2 HOXB2 ITGB3 KPNB1 LRRC46 MIR10A MIR152 MRPL10 MRPL45P2 MYL4 NFE2L1 NPEPPS OSBPL7 PNPO PRR15L RNU6-1201P RP11-6N17.3 RP11-6N17.4 SCRN2 SKAP1 SNX11 SP2 SP6 TBKBP1 TBX21	AC003665.1, CDK5RAP3, EFCAB13, GOSR2, HOXB2, ITGB3, LRRC46, MRPL10, MRPL45P2, MYL4, NFE2L1, OSBPL7, PNPO, RP11-6N17.1, RP11-6N17.3, RP11-6N17.4, SCRN2, SKAP1, SNX11, SP2, SP6, TBKBP1	100506325, 101927122, 114881, 124989, 124995, 29916, 3212, 3690, 4635, 4779, 55163, 653479, 6668, 80279, 80320, 8631, 90506, 90507, 9570, 9755	Ribosome:MRPL10	Mitochondrial translation initiation:MRPL10 | Mitochondrial translation elongation:MRPL10 | Mitochondrial translation termination:MRPL10 | Mitochondrial translation:MRPL10	hemorrhagic fever with renal syndrome:ITGB3 | sensorineural hearing loss:ITGB3 | inner ear disease:ITGB3 | autosomal dominant disease:ITGB3 | hereditary breast ovarian cancer:ITGB3 | auditory system disease:ITGB3 | cystadenocarcinoma:ITGB3 | serous cystadenocarcinoma:ITGB3 | non-small cell lung carcinoma:CDK5RAP3 | bone remodeling disease:ITGB3	positive regulation of cell-matrix adhesion:SKAP1 | negative regulation of protein phosphorylation:CDK5RAP3 | regulation of cell-matrix adhesion:SKAP1 | positive regulation of cell-substrate adhesion:SKAP1 | regulation of tissue remodeling:ITGB3 | regulation of cell-substrate adhesion:SKAP1 | negative regulation of phosphorylation:CDK5RAP3 | negative regulation of protein kinase activity:CDK5RAP3…		IL_1B	6.76773	6.76773	0.0730475		G	C	0.0995887	0.0995887	361	0.996	0	FALSE	0.0369015	0.246576	0.108035
rs10531092:45900578:AAT:A	FALSE		17	17q21.32	a507	45900578	rs9895764:45927961:C:G	0.999273	FALSE	MRPL10 (0.06 kb, near_gene/Downstream gene/MODIFIER); OSBPL7 (1.4 kb, near_gene/Upstream gene/MODIFIER); LRRC46 (8.4 kb); SCRN2 (14 kb); SP6 (22 kb)	MRPL10:protein_coding(KNOWN); OSBPL7:protein_coding(KNOWN); LRRC46:protein_coding(KNOWN); SCRN2:protein_coding(KNOWN); SP6:protein_coding(KNOWN)	MRPL10: mitochondrial ribosomal protein L10 (0.06 kb)			3.813								0.629 Alzheimer's disease (cognitive decline)	ATP5G1 | CDK5RAP3 | COPZ2 | EFCAB13 | GOSR2 | HOXB2 | ITGB3 | LRRC46 | MIR10A | MRPL10 | MRPL45P2 | MYL4 | NFE2L1 | NPEPPS | OSBPL7 | PNPO | RP11-6N17.3 | RP11-6N17.4 | SCRN2 | SKAP1 | SNX11 | SP2 | SP6 | TBKBP1 | TBX21	ATP5G1	ATP5G1 CBX1 CDK5RAP3 COPZ2 EFCAB13 GOSR2 HOXB2 ITGB3 KPNB1 LRRC46 MIR10A MIR152 MRPL10 MRPL45P2 MYL4 NFE2L1 NPEPPS OSBPL7 PNPO PRR15L RP11-6N17.3 RP11-6N17.4 SCRN2 SKAP1 SNX11 SP2 SP6 TBKBP1 TBX21	CDK5RAP3, EFCAB13, GOSR2, HOXB2, ITGB3, LRRC46, MRPL10, MRPL45P2, MYL4, NFE2L1, OSBPL7, PNPO, RP11-6N17.1, RP11-6N17.3, RP11-6N17.4, SCRN2, SKAP1, SNX11, SP2, SP6, TBKBP1	100506325, 101927122, 114881, 124989, 124995, 29916, 3212, 3690, 4635, 4779, 55163, 653479, 6668, 80279, 80320, 8631, 90506, 90507, 9570, 9755	Ribosome:MRPL10	Mitochondrial translation initiation:MRPL10 | Mitochondrial translation elongation:MRPL10 | Mitochondrial translation termination:MRPL10 | Mitochondrial translation:MRPL10	hemorrhagic fever with renal syndrome:ITGB3 | sensorineural hearing loss:ITGB3 | inner ear disease:ITGB3 | autosomal dominant disease:ITGB3 | hereditary breast ovarian cancer:ITGB3 | auditory system disease:ITGB3 | cystadenocarcinoma:ITGB3 | serous cystadenocarcinoma:ITGB3 | non-small cell lung carcinoma:CDK5RAP3 | bone remodeling disease:ITGB3	positive regulation of cell-matrix adhesion:SKAP1 | negative regulation of protein phosphorylation:CDK5RAP3 | regulation of cell-matrix adhesion:SKAP1 | positive regulation of cell-substrate adhesion:SKAP1 | regulation of tissue remodeling:ITGB3 | regulation of cell-substrate adhesion:SKAP1 | negative regulation of phosphorylation:CDK5RAP3 | negative regulation of protein kinase activity:CDK5RAP3…		IL_1B	6.71375	6.71375	0.0724283		A	AAT	0.0997215	0.0997215	361	0.998	0	FALSE	0.0407083	0.24811	0.113235
rs8078688:45919869:T:C	FALSE		17	17q21.32	a507	45919869	rs9895764:45927961:C:G	0.999334	FALSE	SCRN2 (1.2 kb, near_gene/Upstream gene/MODIFIER); SP6 (2.4 kb, near_gene/Downstream gene/MODIFIER); LRRC46 (4.8 kb, near_gene/Downstream gene/MODIFIER); MRPL10 (11 kb); OSBPL7 (21 kb)	SCRN2:protein_coding(KNOWN); SP6:protein_coding(KNOWN); LRRC46:protein_coding(KNOWN); MRPL10:protein_coding(KNOWN); OSBPL7:protein_coding(KNOWN)	SCRN2: secernin 2 (1.2 kb)	-0.0586462	-0.0361965	4.337	0.807821	0.36	0.4	0.61	5	5	Motifs|PWM|Hoxd10|, Motifs|PWM|Hoxa10|, Protein_Binding|ChIP-seq|FOXA1|HepG2|, Protein_Binding|ChIP-seq|FOXA2|HepG2|	0.629 Alzheimer's disease (cognitive decline)	ATP5G1 | CDK5RAP3 | COPZ2 | EFCAB13 | GOSR2 | HOXB2 | ITGB3 | LRRC46 | MIR10A | MRPL10 | MRPL45P2 | MYL4 | NFE2L1 | NPEPPS | OSBPL7 | PNPO | RP11-6N17.3 | RP11-6N17.4 | SCRN2 | SKAP1 | SNX11 | SP2 | SP6 | TBKBP1 | TBX21	ATP5G1	ATP5G1 CBX1 CDK5RAP3 COPZ2 EFCAB13 GOSR2 HOXB2 ITGB3 KPNB1 LRRC46 MIR10A MIR152 MRPL10 MRPL45P2 MYL4 NFE2L1 NPEPPS OSBPL7 PNPO PRR15L RNU6-1201P RP11-6N17.3 RP11-6N17.4 SCRN2 SKAP1 SNX11 SP2 SP6 TBKBP1 TBX21	AC003665.1, CDK5RAP3, EFCAB13, GOSR2, HOXB2, ITGB3, LRRC46, MRPL10, MRPL45P2, MYL4, NFE2L1, OSBPL7, PNPO, RP11-6N17.1, RP11-6N17.3, RP11-6N17.4, SCRN2, SKAP1, SNX11, SP2, SP6, TBKBP1	100506325, 101927122, 114881, 124989, 124995, 29916, 3212, 3690, 4635, 4779, 55163, 653479, 6668, 80279, 80320, 8631, 90506, 90507, 9570, 9755	Ribosome:MRPL10	Mitochondrial translation initiation:MRPL10 | Mitochondrial translation elongation:MRPL10 | Mitochondrial translation termination:MRPL10 | Mitochondrial translation:MRPL10	hemorrhagic fever with renal syndrome:ITGB3 | sensorineural hearing loss:ITGB3 | inner ear disease:ITGB3 | autosomal dominant disease:ITGB3 | hereditary breast ovarian cancer:ITGB3 | auditory system disease:ITGB3 | cystadenocarcinoma:ITGB3 | serous cystadenocarcinoma:ITGB3 | non-small cell lung carcinoma:CDK5RAP3 | bone remodeling disease:ITGB3	positive regulation of cell-matrix adhesion:SKAP1 | negative regulation of protein phosphorylation:CDK5RAP3 | regulation of cell-matrix adhesion:SKAP1 | positive regulation of cell-substrate adhesion:SKAP1 | regulation of tissue remodeling:ITGB3 | regulation of cell-substrate adhesion:SKAP1 | negative regulation of phosphorylation:CDK5RAP3 | negative regulation of protein kinase activity:CDK5RAP3…		IL_1B	6.71011	6.71011	0.0723873		C	T	0.0997382	0.0997382	361	0.999	0	FALSE	0.0404701	0.247801	0.112959
rs10428:45915086:G:A	FALSE		17	17q21.32	a507	45915086	rs9895764:45927961:C:G	0.999304	FALSE	SCRN2 (0 kb, 3'utr/3 prime UTR/MODIFIER | intron/NMD transcript/MODIFIER | near_gene/Downstream gene/MODIFIER); LRRC46 (0.007 kb, near_gene/Downstream gene/MODIFIER); MRPL10 (6.2 kb); SP6 (7.2 kb); OSBPL7 (16 kb)	SCRN2:protein_coding(KNOWN); LRRC46:protein_coding(KNOWN); MRPL10:protein_coding(KNOWN); SP6:protein_coding(KNOWN); OSBPL7:protein_coding(KNOWN)	SCRN2: secernin 2 (0 kb)	1.24743	1.40963	8.088	0.717854	0.51	0.67	0.77	2b	2	Motifs|Footprinting||H1_ES, Motifs|Footprinting|PPARG::RXRA|8988t, Motifs|Footprinting|PPARG::RXRA|Gliobla, Motifs|Footprinting|PPARG::RXRA|Hepg2, Motifs|Footprinting|PPARG::RXRA|Hsmm, Motifs|Footprinting|PPARG::RXRA|Hsmmt, Motifs|Footprinting|PPARG::RXRA|Osteobl, Motifs|Footprinting|HNF4directrepeat1|8988t, Motifs|Footprinting|HNF4directrepeat1|Gliobla, Motifs|Footprinting|HNF4directrepeat1|Hepg…	0.629 Alzheimer's disease (cognitive decline)	ATP5G1 | CDK5RAP3 | COPZ2 | EFCAB13 | GOSR2 | HOXB2 | ITGB3 | LRRC46 | MIR10A | MRPL10 | MRPL45P2 | MYL4 | NFE2L1 | NPEPPS | OSBPL7 | PNPO | RP11-6N17.3 | RP11-6N17.4 | SCRN2 | SKAP1 | SNX11 | SP2 | SP6 | TBKBP1 | TBX21	ATP5G1	ATP5G1 CBX1 CDK5RAP3 COPZ2 EFCAB13 GOSR2 HOXB2 ITGB3 KPNB1 LRRC46 MIR10A MIR152 MRPL10 MRPL45P2 MYL4 NFE2L1 NPEPPS OSBPL7 PNPO PRR15L RP11-6N17.3 RP11-6N17.4 SCRN2 SKAP1 SNX11 SP2 SP6 TBKBP1 TBX21	CDK5RAP3, EFCAB13, GOSR2, HOXB2, ITGB3, LRRC46, MRPL10, MRPL45P2, MYL4, NFE2L1, OSBPL7, PNPO, RP11-6N17.1, RP11-6N17.3, RP11-6N17.4, SCRN2, SKAP1, SNX11, SP2, SP6, TBKBP1	100506325, 101927122, 114881, 124989, 124995, 29916, 3212, 3690, 4635, 4779, 55163, 653479, 6668, 80279, 80320, 8631, 90506, 90507, 9570, 9755	Ribosome:MRPL10	Mitochondrial translation initiation:MRPL10 | Mitochondrial translation elongation:MRPL10 | Mitochondrial translation termination:MRPL10 | Mitochondrial translation:MRPL10	hemorrhagic fever with renal syndrome:ITGB3 | sensorineural hearing loss:ITGB3 | inner ear disease:ITGB3 | autosomal dominant disease:ITGB3 | hereditary breast ovarian cancer:ITGB3 | auditory system disease:ITGB3 | cystadenocarcinoma:ITGB3 | serous cystadenocarcinoma:ITGB3 | non-small cell lung carcinoma:CDK5RAP3 | bone remodeling disease:ITGB3	positive regulation of cell-matrix adhesion:SKAP1 | negative regulation of protein phosphorylation:CDK5RAP3 | regulation of cell-matrix adhesion:SKAP1 | positive regulation of cell-substrate adhesion:SKAP1 | regulation of tissue remodeling:ITGB3 | regulation of cell-substrate adhesion:SKAP1 | negative regulation of phosphorylation:CDK5RAP3 | negative regulation of protein kinase activity:CDK5RAP3…		IL_1B	6.70972	6.70972	0.0723828		A	G	0.0997286	0.0997286	361	0.999	0	FALSE	0.0405772	0.247989	0.11319
rs9915028:45927491:G:T	FALSE		17	17q21.32	a507	45927491	rs9895764:45927961:C:G	0.989411	FALSE	SP6 (0 kb, intron/Intron/MODIFIER); SCRN2 (8.8 kb); LRRC46 (12 kb); MRPL10 (19 kb); OSBPL7 (28 kb); SP2 (46 kb)	SP6:protein_coding(KNOWN); SCRN2:protein_coding(KNOWN); LRRC46:protein_coding(KNOWN); MRPL10:protein_coding(KNOWN); OSBPL7:protein_coding(KNOWN); SP2:protein_coding(KNOWN)	SP6: Sp6 transcription factor (0 kb)	0.694037	1.88555	2.748	0.466155	0.31	0.59	0.78	5	5	Chromatin_Structure|DNase-seq|Psoasmuscleoc|, Chromatin_Structure|DNase-seq|8988t|, Chromatin_Structure|DNase-seq|Frontalcortexoc|, Chromatin_Structure|DNase-seq|Gm12892|, Chromatin_Structure|DNase-seq|Hmec|, Chromatin_Structure|DNase-seq|Lncap|, Chromatin_Structure|DNase-seq|Medullo|, Chromatin_Structure|DNase-seq|Medullod341|, Chromatin_Structure|DNase-seq|Huh75|, Chromatin_Structure|DNase-seq|…	0.629 Alzheimer's disease (cognitive decline)	ATP5G1 | CDK5RAP3 | COPZ2 | EFCAB13 | GOSR2 | HOXB2 | ITGB3 | LRRC46 | MIR10A | MRPL10 | MRPL45P2 | MYL4 | NFE2L1 | NPEPPS | OSBPL7 | PNPO | RP11-6N17.3 | RP11-6N17.4 | SCRN2 | SKAP1 | SNX11 | SP2 | SP6 | TBKBP1 | TBX21	ATP5G1	ATP5G1 CBX1 CDK5RAP3 COPZ2 EFCAB13 GOSR2 HOXB2 ITGB3 KPNB1 LRRC46 MIR10A MIR152 MRPL10 MRPL45P2 MYL4 NFE2L1 NPEPPS OSBPL7 PNPO PRR15L RNU6-1201P RP11-6N17.3 RP11-6N17.4 SCRN2 SKAP1 SNX11 SP2 SP6 TBKBP1 TBX21	AC003665.1, CDK5RAP3, EFCAB13, GOSR2, HOXB2, ITGB3, LRRC46, MRPL10, MRPL45P2, MYL4, NFE2L1, OSBPL7, PNPO, RP11-6N17.1, RP11-6N17.3, RP11-6N17.4, SCRN2, SKAP1, SNX11, SP2, SP6, TBKBP1	100506325, 101927122, 114881, 124989, 124995, 29916, 3212, 3690, 4635, 4779, 55163, 653479, 6668, 80279, 80320, 8631, 90506, 90507, 9570, 9755	Ribosome:MRPL10	Mitochondrial translation initiation:MRPL10 | Mitochondrial translation elongation:MRPL10 | Mitochondrial translation termination:MRPL10 | Mitochondrial translation:MRPL10	hemorrhagic fever with renal syndrome:ITGB3 | sensorineural hearing loss:ITGB3 | inner ear disease:ITGB3 | autosomal dominant disease:ITGB3 | hereditary breast ovarian cancer:ITGB3 | auditory system disease:ITGB3 | cystadenocarcinoma:ITGB3 | serous cystadenocarcinoma:ITGB3 | non-small cell lung carcinoma:CDK5RAP3 | bone remodeling disease:ITGB3	positive regulation of cell-matrix adhesion:SKAP1 | negative regulation of protein phosphorylation:CDK5RAP3 | regulation of cell-matrix adhesion:SKAP1 | positive regulation of cell-substrate adhesion:SKAP1 | regulation of tissue remodeling:ITGB3 | regulation of cell-substrate adhesion:SKAP1 | negative regulation of phosphorylation:CDK5RAP3 | negative regulation of protein kinase activity:CDK5RAP3…		IL_1B	6.6682	6.6682	0.0719071		T	G	0.101108	0.101108	361	1	2	FALSE	0.0248132	0.217697	0.0786983
rs9897598:45923496:G:A	FALSE		17	17q21.32	a507	45923496	rs9895764:45927961:C:G	0.997818	FALSE	SP6 (0 kb, 3'utr/3 prime UTR/MODIFIER); SCRN2 (4.8 kb, near_gene/Upstream gene/MODIFIER); LRRC46 (8.4 kb); MRPL10 (15 kb); OSBPL7 (24 kb)	SP6:protein_coding(KNOWN); SCRN2:protein_coding(KNOWN); LRRC46:protein_coding(KNOWN); MRPL10:protein_coding(KNOWN); OSBPL7:protein_coding(KNOWN)	SP6: Sp6 transcription factor (0 kb)	-0.100396	-0.157313	8.871	0.70831	0.47	0.73	0.73	5	5	Motifs|Footprinting|EWSR1-FLI1|Chorion, Motifs|Footprinting|EWSR1-FLI1|Gm12891, Motifs|Footprinting|EWSR1-FLI1|Mcf7Hypoxlac, Motifs|Footprinting|EWSR1-FLI1|LncapAndro, Motifs|Footprinting|EWSR1-FLI1|Huh7, Motifs|PWM|EWSR1-FLI1|, Motifs|PWM|Gabpa|, Chromatin_Structure|DNase-seq|Psoasmuscleoc|, Chromatin_Structure|DNase-seq|8988t|, Chromatin_Structure|DNase-seq|Hepatocytes|, Chromatin_Structure|DNa…	0.629 Alzheimer's disease (cognitive decline)	ATP5G1 | CDK5RAP3 | COPZ2 | EFCAB13 | GOSR2 | HOXB2 | ITGB3 | LRRC46 | MIR10A | MRPL10 | MRPL45P2 | MYL4 | NFE2L1 | NPEPPS | OSBPL7 | PNPO | RP11-6N17.3 | RP11-6N17.4 | SCRN2 | SKAP1 | SNX11 | SP2 | SP6 | TBKBP1 | TBX21	ATP5G1	ATP5G1 CBX1 CDK5RAP3 COPZ2 EFCAB13 GOSR2 HOXB2 ITGB3 KPNB1 LRRC46 MIR10A MIR152 MRPL10 MRPL45P2 MYL4 NFE2L1 NPEPPS OSBPL7 PNPO PRR15L RNU6-1201P RP11-6N17.3 RP11-6N17.4 SCRN2 SKAP1 SNX11 SP2 SP6 TBKBP1 TBX21	AC003665.1, CDK5RAP3, EFCAB13, GOSR2, HOXB2, ITGB3, LRRC46, MRPL10, MRPL45P2, MYL4, NFE2L1, OSBPL7, PNPO, RP11-6N17.1, RP11-6N17.3, RP11-6N17.4, SCRN2, SKAP1, SNX11, SP2, SP6, TBKBP1	100506325, 101927122, 114881, 124989, 124995, 29916, 3212, 3690, 4635, 4779, 55163, 653479, 6668, 80279, 80320, 8631, 90506, 90507, 9570, 9755	Ribosome:MRPL10	Mitochondrial translation initiation:MRPL10 | Mitochondrial translation elongation:MRPL10 | Mitochondrial translation termination:MRPL10 | Mitochondrial translation:MRPL10	hemorrhagic fever with renal syndrome:ITGB3 | sensorineural hearing loss:ITGB3 | inner ear disease:ITGB3 | autosomal dominant disease:ITGB3 | hereditary breast ovarian cancer:ITGB3 | auditory system disease:ITGB3 | cystadenocarcinoma:ITGB3 | serous cystadenocarcinoma:ITGB3 | non-small cell lung carcinoma:CDK5RAP3 | bone remodeling disease:ITGB3	positive regulation of cell-matrix adhesion:SKAP1 | negative regulation of protein phosphorylation:CDK5RAP3 | regulation of cell-matrix adhesion:SKAP1 | positive regulation of cell-substrate adhesion:SKAP1 | regulation of tissue remodeling:ITGB3 | regulation of cell-substrate adhesion:SKAP1 | negative regulation of phosphorylation:CDK5RAP3 | negative regulation of protein kinase activity:CDK5RAP3…		IL_1B	6.66512	6.66512	0.0718709		A	G	0.100406	0.100406	361	0.995	0	FALSE	0.0390768	0.243557	0.109675
rs7214694:45895353:C:T	FALSE		17	17q21.32	a507	45895353	rs9895764:45927961:C:G	0.968322	FALSE	OSBPL7 (0 kb, intron/NMD transcript/MODIFIER | intron/Intron/MODIFIER | nc-RNA/Non coding transcript/MODIFIER | near_gene/Downstream gene/MODIFIER | near_gene/Upstream gene/MODIFIER); MRPL10 (5.3 kb); LRRC46 (14 kb); SCRN2 (20 kb); SP6 (27 kb)	OSBPL7:protein_coding(KNOWN); MRPL10:protein_coding(KNOWN); LRRC46:protein_coding(KNOWN); SCRN2:protein_coding(KNOWN); SP6:protein_coding(KNOWN)	OSBPL7: oxysterol binding protein-like 7 (0 kb)	-0.100991	-0.187784	3.377	0.471227	0.3	0.09	0.25	5	5	Chromatin_Structure|DNase-seq|Gm12891|, Chromatin_Structure|DNase-seq|Gm12892|, Chromatin_Structure|DNase-seq|8988t|, Chromatin_Structure|DNase-seq|Chorion|, Chromatin_Structure|DNase-seq|Gm12878|	0.651 Alzheimer's disease (cognitive decline)	ATP5G1 | CDK5RAP3 | COPZ2 | EFCAB13 | GOSR2 | HOXB2 | ITGB3 | LRRC46 | MIR10A | MRPL10 | MRPL45P2 | MYL4 | NFE2L1 | NPEPPS | OSBPL7 | PNPO | RP11-6N17.3 | RP11-6N17.4 | SCRN2 | SKAP1 | SNX11 | SP2 | SP6 | TBKBP1 | TBX21	ATP5G1	ATP5G1 CDK5RAP3 COPZ2 EFCAB13 GOSR2 HOXB2 ITGB3 KPNB1 LRRC46 MIR10A MIR152 MRPL10 MRPL45P2 MYL4 NFE2L1 NPEPPS OSBPL7 PNPO PRR15L RP11-6N17.3 RP11-6N17.4 SCRN2 SKAP1 SNX11 SP2 SP6 TBKBP1 TBX21	CDK5RAP3, EFCAB13, GOSR2, HOXB2, ITGB3, LRRC46, MRPL10, MRPL45P2, MYL4, NFE2L1, OSBPL7, PNPO, RP11-6N17.1, RP11-6N17.3, RP11-6N17.4, SCRN2, SKAP1, SNX11, SP2, SP6, TBKBP1	100506325, 101927122, 114881, 124989, 124995, 29916, 3212, 3690, 4635, 4779, 55163, 653479, 6668, 80279, 80320, 8631, 90506, 90507, 9570, 9755	Ribosome:MRPL10	Mitochondrial translation initiation:MRPL10 | Mitochondrial translation elongation:MRPL10 | Mitochondrial translation termination:MRPL10 | Mitochondrial translation:MRPL10	hemorrhagic fever with renal syndrome:ITGB3 | sensorineural hearing loss:ITGB3 | inner ear disease:ITGB3 | autosomal dominant disease:ITGB3 | hereditary breast ovarian cancer:ITGB3 | auditory system disease:ITGB3 | cystadenocarcinoma:ITGB3 | serous cystadenocarcinoma:ITGB3 | non-small cell lung carcinoma:CDK5RAP3 | bone remodeling disease:ITGB3	positive regulation of cell-matrix adhesion:SKAP1 | negative regulation of protein phosphorylation:CDK5RAP3 | regulation of cell-matrix adhesion:SKAP1 | positive regulation of cell-substrate adhesion:SKAP1 | regulation of tissue remodeling:ITGB3 | regulation of cell-substrate adhesion:SKAP1 | negative regulation of phosphorylation:CDK5RAP3 | negative regulation of protein kinase activity:CDK5RAP3…		IL_1B	6.62581	6.62581	0.0714214		T	C	0.100537	0.100537	361	0.983	0	FALSE	0.038539	0.26109	0.0997232
rs11079798:45936887:G:C	FALSE		17	17q21.32	a507	45936887	rs9903904:45929169:C:T	0.866523	FALSE	SP6 (3.6 kb, near_gene/Upstream gene/MODIFIER); RP11-6N17.1 (3.8 kb, near_gene/Upstream gene/MODIFIER); SCRN2 (18 kb); LRRC46 (22 kb); MRPL10 (28 kb); SP2 (37 kb); OSBPL7 (38 kb)	SP6:protein_coding(KNOWN); RP11-6N17.1:lincRNA(KNOWN); SCRN2:protein_coding(KNOWN); LRRC46:protein_coding(KNOWN); MRPL10:protein_coding(KNOWN); SP2:protein_coding(KNOWN); OSBPL7:protein_coding(KNOWN)	SP6: Sp6 transcription factor (3.6 kb)	0.0196608	-0.0615016	0.998	0.562432	0.23	0.37	0.36	3a	3	Motifs|PWM|AP-2|, Chromatin_Structure|DNase-seq|T47d|Est10nm30m, Chromatin_Structure|DNase-seq|T47d|, Chromatin_Structure|DNase-seq|Medullo|, Protein_Binding|ChIP-seq|GATA3|T-47D|02pct	0.958 Alzheimer's disease (cognitive decline)	AC003665.1 | ATP5G1 | CDK5RAP3 | COPZ2 | EFCAB13 | GOSR2 | HOXB2 | HOXB3 | HOXB4 | ITGB3 | LRRC46 | MIR10A | MRPL10 | MRPL45P2 | MYL4 | NFE2L1 | NPEPPS | OSBPL7 | PNPO | PRR15L | RP11-6N17.2 | RP11-6N17.3 | RP11-6N17.4 | SCRN2 | SKAP1 | SNX11 | SP2 | SP6 | TBKBP1 | TBX21 | UBE2Z		AC003665.1 ATP5G1 CBX1 CDK5RAP3 COPZ2 EFCAB13 GOSR2 HOXB2 HOXB3 HOXB4 ITGB3 KPNB1 LRRC46 MIR10A MIR152 MRPL10 MRPL45P2 MYL4 NFE2L1 NPEPPS OSBPL7 PNPO PRR15L RNU6-1201P RP11-6N17.1 RP11-6N17.2 RP11-6N17.3 RP11-6N17.4 SCRN2 SKAP1 SNX11 SP2 SP6 TBKBP1 TBX21 UBE2Z	AC003665.1, ATP5G1, CDK5RAP3, EFCAB13, HOXB2, LRRC46, MRPL10, MRPL45P2, MYL4, NFE2L1, OSBPL7, PNPO, RP11-6N17.1, RP11-6N17.4, SCRN2, SKAP1, SNX11, SP2, SP6, TBKBP1	100506325, 101927122, 114881, 124989, 124995, 29916, 3212, 4635, 4779, 516, 55163, 653479, 6668, 80279, 80320, 8631, 90506, 90507, 9755	Ribosome:MRPL10	Mitochondrial translation initiation:MRPL10 | Mitochondrial translation elongation:MRPL10 | Mitochondrial translation termination:MRPL10 | Mitochondrial translation:MRPL10	non-small cell lung carcinoma:CDK5RAP3	positive regulation of cell-matrix adhesion:SKAP1 | negative regulation of protein phosphorylation:CDK5RAP3 | regulation of cell-matrix adhesion:SKAP1 | positive regulation of cell-substrate adhesion:SKAP1 | regulation of cell-substrate adhesion:SKAP1 | negative regulation of phosphorylation:CDK5RAP3 | negative regulation of protein kinase activity:CDK5RAP3 | regulation of cellular protein catabo…		IL_1B	6.56195	6.56195	0.0706883		C	G	0.121868	0.121868	361	0.975	0	FALSE	0.0166471	0.316056	0.132038
rs9895508:45884026:G:A	FALSE		17	17q21.32	a507	45884026	rs9895764:45927961:C:G	0.864278	FALSE	OSBPL7 (0.71 kb, near_gene/Downstream gene/MODIFIER); MRPL10 (17 kb); LRRC46 (25 kb); SCRN2 (31 kb); SP6 (38 kb)	OSBPL7:protein_coding(KNOWN); MRPL10:protein_coding(KNOWN); LRRC46:protein_coding(KNOWN); SCRN2:protein_coding(KNOWN); SP6:protein_coding(KNOWN)	OSBPL7: oxysterol binding protein-like 7 (0.71 kb)	-0.315888	-0.21023	2.084	0.524799	0.19	0.24	0.22	6	6		0.473 Alzheimer's disease (cognitive decline)	ATP5G1 | CDK5RAP3 | COPZ2 | EFCAB13 | GOSR2 | HOXB2 | ITGB3 | LRRC46 | MIR10A | MRPL10 | MRPL45P2 | MYL4 | NFE2L1 | NPEPPS | OSBPL7 | PNPO | RP11-6N17.3 | RP11-6N17.4 | SCRN2 | SKAP1 | SNX11 | SP2 | SP6 | TBKBP1 | TBX21		ATP5G1 CDK5RAP3 COPZ2 EFCAB13 GOSR2 HOXB2 ITGB3 KPNB1 LRRC46 MIR10A MIR152 MRPL10 MRPL45P2 MYL4 NFE2L1 NPEPPS OSBPL7 PNPO PRR15L RP11-6N17.3 RP11-6N17.4 SCRN2 SKAP1 SNX11 SP2 SP6 TBKBP1 TBX21	CDK5RAP3, EFCAB13, HOXB2, LRRC46, MRPL10, MRPL45P2, MYL4, NFE2L1, OSBPL7, RP11-6N17.4, SCRN2, SKAP1, SNX11, SP2, SP6, TBKBP1	100506325, 114881, 124989, 124995, 29916, 3212, 4635, 4779, 653479, 6668, 80279, 80320, 8631, 90506, 90507, 9755	Ribosome:MRPL10	Mitochondrial translation initiation:MRPL10 | Mitochondrial translation elongation:MRPL10 | Mitochondrial translation termination:MRPL10 | Mitochondrial translation:MRPL10	non-small cell lung carcinoma:CDK5RAP3	positive regulation of cell-matrix adhesion:SKAP1 | negative regulation of protein phosphorylation:CDK5RAP3 | regulation of cell-matrix adhesion:SKAP1 | positive regulation of cell-substrate adhesion:SKAP1 | regulation of cell-substrate adhesion:SKAP1 | negative regulation of phosphorylation:CDK5RAP3 | negative regulation of protein kinase activity:CDK5RAP3 | regulation of cellular protein catabo…		IL_1B	6.52484	6.52484	0.0702629		A	G	0.121312	0.121312	361	0.866	0	FALSE	0.0566091	0.269201	0.0761459
rs4794204:45937787:G:A	FALSE		17	17q21.32	a507	45937787	rs9903904:45929169:C:T	0.863879	FALSE	RP11-6N17.1 (2.9 kb, near_gene/Upstream gene/MODIFIER); SP6 (4.5 kb, near_gene/Upstream gene/MODIFIER); SCRN2 (19 kb); LRRC46 (23 kb); MRPL10 (29 kb); SP2 (36 kb); OSBPL7 (39 kb)	RP11-6N17.1:lincRNA(KNOWN); SP6:protein_coding(KNOWN); SCRN2:protein_coding(KNOWN); LRRC46:protein_coding(KNOWN); MRPL10:protein_coding(KNOWN); SP2:protein_coding(KNOWN); OSBPL7:protein_coding(KNOWN)	SP6: Sp6 transcription factor (4.5 kb)	0.149029	-0.139921	3.11	0.375033	0.3	0.63	0.49	6	6	Motifs|Footprinting|HMGIY|A549, Motifs|Footprinting|HMGIY|Gm12878, Motifs|Footprinting|HMGIY|Hsmmt, Motifs|Footprinting|HMGIY|Htr8, Motifs|Footprinting|HMGIY|Huh75, Motifs|Footprinting|HMGIY|LncapAndro, Motifs|Footprinting|HMGIY|Mcf7Hypoxlac, Motifs|PWM|HMGIY|	0.958 Alzheimer's disease (cognitive decline)	AC003665.1 | ATP5G1 | CDK5RAP3 | COPZ2 | EFCAB13 | GOSR2 | HOXB2 | HOXB3 | HOXB4 | ITGB3 | LRRC46 | MIR10A | MRPL10 | MRPL45P2 | MYL4 | NFE2L1 | NPEPPS | OSBPL7 | PNPO | PRR15L | RP11-6N17.2 | RP11-6N17.3 | RP11-6N17.4 | SCRN2 | SKAP1 | SNX11 | SP2 | SP6 | TBKBP1 | TBX21 | UBE2Z		AC003665.1 ATP5G1 CBX1 CDK5RAP3 COPZ2 EFCAB13 GOSR2 HOXB2 HOXB3 HOXB4 ITGB3 KPNB1 LRRC46 MIR10A MIR152 MRPL10 MRPL45P2 MYL4 NFE2L1 NPEPPS OSBPL7 PNPO PRR15L RNU6-1201P RP11-6N17.1 RP11-6N17.2 RP11-6N17.3 RP11-6N17.4 SCRN2 SKAP1 SNX11 SP2 SP6 TBKBP1 TBX21 UBE2Z	AC003665.1, ATP5G1, CDK5RAP3, EFCAB13, HOXB2, LRRC46, MRPL10, MRPL45P2, MYL4, NFE2L1, OSBPL7, PNPO, RP11-6N17.1, RP11-6N17.4, SCRN2, SKAP1, SNX11, SP2, SP6, TBKBP1	100506325, 101927122, 114881, 124989, 124995, 29916, 3212, 4635, 4779, 516, 55163, 653479, 6668, 80279, 80320, 8631, 90506, 90507, 9755	Ribosome:MRPL10	Mitochondrial translation initiation:MRPL10 | Mitochondrial translation elongation:MRPL10 | Mitochondrial translation termination:MRPL10 | Mitochondrial translation:MRPL10	non-small cell lung carcinoma:CDK5RAP3	positive regulation of cell-matrix adhesion:SKAP1 | negative regulation of protein phosphorylation:CDK5RAP3 | regulation of cell-matrix adhesion:SKAP1 | positive regulation of cell-substrate adhesion:SKAP1 | regulation of cell-substrate adhesion:SKAP1 | negative regulation of phosphorylation:CDK5RAP3 | negative regulation of protein kinase activity:CDK5RAP3 | regulation of cellular protein catabo…		IL_1B	6.52401	6.52401	0.0702532		A	G	0.121989	0.121989	361	0.974	0	FALSE	0.0161477	0.31554	0.130836
rs62066132:45937923:T:C	FALSE		17	17q21.32	a507	45937923	rs9903904:45929169:C:T	0.863225	FALSE	RP11-6N17.1 (2.8 kb, near_gene/Upstream gene/MODIFIER); SP6 (4.7 kb, near_gene/Upstream gene/MODIFIER); SCRN2 (19 kb); LRRC46 (23 kb); MRPL10 (29 kb); SP2 (36 kb); OSBPL7 (39 kb)	RP11-6N17.1:lincRNA(KNOWN); SP6:protein_coding(KNOWN); SCRN2:protein_coding(KNOWN); LRRC46:protein_coding(KNOWN); MRPL10:protein_coding(KNOWN); SP2:protein_coding(KNOWN); OSBPL7:protein_coding(KNOWN)	SP6: Sp6 transcription factor (4.7 kb)	0.18141	-0.133287	4.616	0.685016	0.34	0.59	0.5	7	7		0.958 Alzheimer's disease (cognitive decline)	AC003665.1 | ATP5G1 | CDK5RAP3 | COPZ2 | EFCAB13 | GOSR2 | HOXB2 | HOXB3 | HOXB4 | ITGB3 | LRRC46 | MIR10A | MRPL10 | MRPL45P2 | MYL4 | NFE2L1 | NPEPPS | OSBPL7 | PNPO | PRR15L | RP11-6N17.2 | RP11-6N17.3 | RP11-6N17.4 | SCRN2 | SKAP1 | SNX11 | SP2 | SP6 | TBKBP1 | TBX21 | UBE2Z		AC003665.1 ATP5G1 CBX1 CDK5RAP3 COPZ2 EFCAB13 GOSR2 HOXB2 HOXB3 HOXB4 ITGB3 KPNB1 LRRC46 MIR10A MIR152 MRPL10 MRPL45P2 MYL4 NFE2L1 NPEPPS OSBPL7 PNPO PRR15L RNU6-1201P RP11-6N17.1 RP11-6N17.2 RP11-6N17.3 RP11-6N17.4 SCRN2 SKAP1 SNX11 SP2 SP6 TBKBP1 TBX21 UBE2Z	AC003665.1, ATP5G1, CDK5RAP3, EFCAB13, HOXB2, LRRC46, MRPL10, MRPL45P2, MYL4, NFE2L1, OSBPL7, PNPO, RP11-6N17.1, RP11-6N17.4, SCRN2, SKAP1, SNX11, SP2, SP6, TBKBP1	100506325, 101927122, 114881, 124989, 124995, 29916, 3212, 4635, 4779, 516, 55163, 653479, 6668, 80279, 80320, 8631, 90506, 90507, 9755	Ribosome:MRPL10	Mitochondrial translation initiation:MRPL10 | Mitochondrial translation elongation:MRPL10 | Mitochondrial translation termination:MRPL10 | Mitochondrial translation:MRPL10	non-small cell lung carcinoma:CDK5RAP3	positive regulation of cell-matrix adhesion:SKAP1 | negative regulation of protein phosphorylation:CDK5RAP3 | regulation of cell-matrix adhesion:SKAP1 | positive regulation of cell-substrate adhesion:SKAP1 | regulation of cell-substrate adhesion:SKAP1 | negative regulation of phosphorylation:CDK5RAP3 | negative regulation of protein kinase activity:CDK5RAP3 | regulation of cellular protein catabo…		IL_1B	6.51516	6.51516	0.0701516		C	T	0.122017	0.122017	361	0.973	0	FALSE	0.0160349	0.315411	0.130584
[truncated: 34 more rows]
[truncated: 37 more columns]
