# Supplementary material for: Genetic Regulation of Cytokine Response in Patients with Acute Community-Acquired Pneumonia
Source: Genes (Basel). 2022 Jan 6;13(1):111. doi: 10.3390/genes13010111 (PMC8774373; doi:10.3390/genes13010111)
Supplement: Supplementary file 1 [file genes-13-00111-s001.zip › supplementary_table_s4_20211127.xlsx]

## Sheet: MetaXcan
phenotype	tissue	gene	gene_name	zscore	effect_size	pvalue	var_g	pred_perf_r2	pred_perf_pval	pred_perf_qval	n_snps_used	n_snps_in_cov	n_snps_in_model	best_gwas_p	largest_weight	hierarchFDR
IL_12	Whole_Blood	ENSG00000181577.15	C6orf223	574161195755005	372650202434376	937795	0.00949756054938052	NA	NA	NA	1	3	3	937795	0.138593242839027	TRUE
IL_1B	Adipose_Subcutaneous	ENSG00000073350.13	LLGL2	470958805084229	191445990391669	2.48218e+07	0.0150865457145207	NA	NA	NA	1	3	3	2.48218e+08	0.321033623500085	TRUE
IL_1B	Adipose_Subcutaneous	ENSG00000141295.13	SCRN2	-460420281131301	-0.568199716366822	4.14049e+08	0.156020870471024	NA	NA	NA	4	4	4	5.34936e+07	0.510093039563868	TRUE
IL_1B	Adipose_Visceral_Omentum	ENSG00000141295.13	SCRN2	-582753932517181	-101338002903851	562506	0.0829114439929493	NA	NA	NA	4	4	4	293145	0.395211754309918	TRUE
IL_1B	Adipose_Visceral_Omentum	ENSG00000073350.13	LLGL2	470920181274414	151673268020508	2.48689e+07	0.0260462471018433	NA	NA	NA	1	2	2	2.48689e+07	0.405242141889429	TRUE
IL_1B	Adrenal_Gland	ENSG00000141295.13	SCRN2	-461970004383595	-0.692587043335743	3.84295e+08	0.10876322134968	NA	NA	NA	3	3	3	1.94934e+07	0.449057209559639	TRUE
IL_1B	Artery_Aorta	ENSG00000141295.13	SCRN2	-563438066890607	-0.935635955525577	1.75689e+06	0.0855802816987086	NA	NA	NA	2	2	2	499593	0.549063163171487	TRUE
IL_1B	Artery_Aorta	ENSG00000106615.9	RHEB	456187534332275	102596833375795	5.06987e+07	5.08379e+08	NA	NA	NA	1	1	1	5.06987e+08	0.00959251828363146	TRUE
IL_1B	Artery_Coronary	ENSG00000141295.13	SCRN2	-492997598648071	-116260447977353	8.22397e+07	0.0526365726461909	NA	NA	NA	1	1	1	8.22397e+07	0.461850964228691	TRUE
IL_1B	Artery_Tibial	ENSG00000141295.13	SCRN2	-542235816542852	-0.864573164769839	5.88179e+06	0.104106619626497	NA	NA	NA	3	3	3	499593	0.609353792838537	TRUE
IL_1B	Brain_Amygdala	ENSG00000141295.13	SCRN2	-585765067835282	-138780518967644	469461	0.0542901671998065	NA	NA	NA	3	3	3	293145	0.378757826687719	TRUE
IL_1B	Brain_Amygdala	ENSG00000189120.4	SP6	571677446365356	137297717147662	1.08565e+06	0.00055224321300687	NA	NA	NA	1	1	1	1.08565e+06	0.0403708096183331	TRUE
IL_1B	Brain_Amygdala	ENSG00000128011.4	LRFN1	430557584762573	54879379263296	1.66552e+09	8.46671e+08	NA	NA	NA	1	1	1	1.66552e+09	0.0225405246306663	TRUE
IL_1B	Brain_Amygdala	ENSG00000179134.15	SAMD4B	-429291439056397	-731410719971889	1.76343e+09	0.000471842305822826	NA	NA	NA	1	1	1	1.76343e+09	0.168269341205076	TRUE
IL_1B	Brain_Amygdala	ENSG00000130755.12	GMFG	429291439056397	169767734980739	1.76343e+09	8.75809e+08	NA	NA	NA	1	1	1	1.76343e+09	0.0724955186649355	TRUE
IL_1B	Brain_Anterior_cingulate_cortex_BA24	ENSG00000141295.13	SCRN2	-582930962988281	-13049950801451	556571	0.0559791209905285	NA	NA	NA	2	2	2	499593	0.400778547248019	TRUE
IL_1B	Brain_Anterior_cingulate_cortex_BA24	ENSG00000073350.13	LLGL2	470920181274414	281540859607374	2.48689e+07	0.00724533641533528	NA	NA	NA	1	1	1	2.48689e+07	0.218314315320753	TRUE
IL_1B	Brain_Anterior_cingulate_cortex_BA24	ENSG00000128011.4	LRFN1	430557584762573	1949035961302	1.66552e+09	8.81786e+09	NA	NA	NA	1	1	1	1.66552e+09	0.0634677873862136	TRUE
IL_1B	Brain_Anterior_cingulate_cortex_BA24	ENSG00000179134.15	SAMD4B	-429291439056396	-809123770005807	1.76343e+09	0.000506476536772552	NA	NA	NA	1	1	1	1.76343e+09	0.152107754786535	TRUE
IL_1B	Brain_Anterior_cingulate_cortex_BA24	ENSG00000130755.12	GMFG	429291439056396	181080121201666	1.76343e+09	0.00010112247662325	NA	NA	NA	1	1	1	1.76343e+09	0.0679665990851277	TRUE
IL_1B	Brain_Caudate_basal_ganglia	ENSG00000141295.13	SCRN2	-595220199945364	-114500789552418	264559	0.0788495844347098	NA	NA	NA	3	3	3	499593	0.446218940720691	TRUE
IL_1B	Brain_Caudate_basal_ganglia	ENSG00000128011.4	LRFN1	430557584762573	156899021929246	1.66552e+09	0.000210494488762094	NA	NA	NA	1	1	1	1.66552e+09	0.0788411543162987	TRUE
IL_1B	Brain_Caudate_basal_ganglia	ENSG00000130755.12	GMFG	429291439056396	204050303339988	1.76343e+09	0.000123194954967167	NA	NA	NA	1	1	1	1.76343e+09	0.0603155192545508	TRUE
IL_1B	Brain_Caudate_basal_ganglia	ENSG00000179134.15	SAMD4B	-429291439056396	-945877389374241	1.76343e+09	0.000573320834711309	NA	NA	NA	1	1	1	1.76343e+09	0.130116230055379	TRUE
IL_1B	Brain_Caudate_basal_ganglia	ENSG00000073350.13	LLGL2	427869974533478	125830831114901	1.87988e+09	0.0320870212993174	NA	NA	NA	2	2	2	2.48689e+07	0.208096738416452	TRUE
IL_1B	Brain_Cerebellar_Hemisphere	ENSG00000141294.9	LRRC46	54720349764555	0.646484363128544	444897	0.173291782858377	NA	NA	NA	3	3	3	499593	0.857933128115566	TRUE
IL_1B	Brain_Cerebellar_Hemisphere	ENSG00000141295.13	SCRN2	-486564016342163	-0.873794240043512	1.14087e+08	0.0885491787477491	NA	NA	NA	1	1	1	1.14087e+08	0.608456746033854	TRUE
IL_1B	Brain_Cerebellar_Hemisphere	ENSG00000159111.12	MRPL10	438060235201548	0.458446183903488	1.18352e+09	0.210955923721792	NA	NA	NA	3	3	3	499593	117705394951667	TRUE
IL_1B	Brain_Cerebellar_Hemisphere	ENSG00000130755.12	GMFG	429291439056396	704812422971795	1.76343e+09	0.000761925839485237	NA	NA	NA	1	1	1	1.76343e+09	0.174619510083359	TRUE
IL_1B	Brain_Cerebellar_Hemisphere	ENSG00000179134.15	SAMD4B	-429291439056396	-785706121925681	1.76343e+09	0.000613111594081374	NA	NA	NA	1	1	1	1.76343e+09	0.156641263909665	TRUE
IL_1B	Brain_Cerebellum	ENSG00000141294.9	LRRC46	566724267494424	0.60975695763372	1.45114e+06	0.202797951834442	NA	NA	NA	2	2	2	499593	0.887728276431388	TRUE
IL_1B	Brain_Cerebellum	ENSG00000141295.13	SCRN2	-451379230764313	-0.506003323571496	6.36786e+08	0.218959956718923	NA	NA	NA	3	3	3	1.94934e+07	0.716928612143441	TRUE
IL_1B	Brain_Cortex	ENSG00000141295.13	SCRN2	-601721710748214	-135308762907355	177441	0.0550281319339635	NA	NA	NA	2	2	2	293145	0.417784181208944	TRUE
IL_1B	Brain_Cortex	ENSG00000073350.13	LLGL2	470958805084229	258650827944242	2.48218e+08	0.00860867008296308	NA	NA	NA	1	3	3	2.48218e+08	0.237619962358092	TRUE
IL_1B	Brain_Frontal_Cortex_BA9	ENSG00000141295.13	SCRN2	-553464359310913	-102782199530227	3.11862e+06	0.0746248069298472	NA	NA	NA	3	3	3	293145	0.390010460157895	TRUE
IL_1B	Brain_Hippocampus	ENSG00000141295.13	SCRN2	-585717455838905	-120489195939983	470808	0.0568747231969527	NA	NA	NA	2	2	2	499593	0.440905304853646	TRUE
IL_1B	Brain_Hippocampus	ENSG00000073350.13	LLGL2	470958805084229	327174875379117	2.48218e+08	0.00491986993437077	NA	NA	NA	1	1	1	2.48218e+08	0.187852444136433	TRUE
IL_1B	Brain_Hypothalamus	ENSG00000141295.13	SCRN2	-541081035931728	-0.765384363197518	6.27402e+06	0.121041544597504	NA	NA	NA	3	3	3	499593	0.505850884620255	TRUE
IL_1B	Brain_Nucleus_accumbens_basal_ganglia	ENSG00000141295.13	SCRN2	-580871348360862	-131355256546488	629547	0.0561552314754283	NA	NA	NA	2	2	2	499593	0.39524136423108	TRUE
IL_1B	Brain_Putamen_basal_ganglia	ENSG00000141295.13	SCRN2	-589807722545462	-102265570411782	367762	0.0790749803982016	NA	NA	NA	2	2	2	499593	0.525502508555818	TRUE
IL_1B	Brain_Spinal_cord_cervical_c-1	ENSG00000141295.13	SCRN2	-584730768203735	-0.888003663913305	499593	0.122750351178775	NA	NA	NA	1	1	1	499593	0.620178747431121	TRUE
IL_1B	Brain_Spinal_cord_cervical_c-1	ENSG00000073350.13	LLGL2	470920181274414	177521093373314	2.48689e+07	0.0201537683906415	NA	NA	NA	1	1	1	2.48689e+07	0.346237164452029	TRUE
IL_1B	Brain_Substantia_nigra	ENSG00000141295.13	SCRN2	-586492310029175	-120424791301525	449341	0.0707291443660779	NA	NA	NA	2	2	2	499593	0.441843719509096	TRUE
IL_1B	Brain_Substantia_nigra	ENSG00000128011.4	LRFN1	-430557584762573	-280042823126407	1.66552e+09	7.56822e+09	NA	NA	NA	1	1	1	1.66552e+09	0.0441721728909165	TRUE
IL_1B	Brain_Substantia_nigra	ENSG00000179134.15	SAMD4B	-429291439056396	-969826531260711	1.76343e+09	0.000624655458849096	NA	NA	NA	1	1	1	1.76343e+09	0.126903106929867	TRUE
IL_1B	Brain_Substantia_nigra	ENSG00000130755.12	GMFG	429291439056396	213680772716101	1.76343e+08	0.00012867606463819	NA	NA	NA	1	1	1	1.76343e+09	0.0575971335350409	TRUE
IL_1B	Breast_Mammary_Tissue	ENSG00000141295.13	SCRN2	-586125289243566	-112245903307032	459388	0.0718870754812011	NA	NA	NA	4	4	4	499593	0.363523858622129	TRUE
IL_1B	Breast_Mammary_Tissue	ENSG00000073350.13	LLGL2	470920181274414	510028729672621	2.48689e+07	0.00205722657489173	NA	NA	NA	1	2	2	2.48689e+07	0.120511642627373	TRUE
IL_1B	Breast_Mammary_Tissue	ENSG00000112561.17	TFEB	-449589157104492	-27891551551305	6.9279e+07	0.00494097817254325	NA	NA	NA	1	1	1	6.9279e+07	0.100711858744501	TRUE
IL_1B	Cells_Cultured_fibroblasts	ENSG00000141295.13	SCRN2	-480362578193433	-0.380505621163036	1.55818e+08	0.389448893167057	NA	NA	NA	5	5	5	499593	109722990436319	TRUE
IL_1B	Cells_EBV-transformed_lymphocytes	ENSG00000141295.13	SCRN2	-575524754082696	-0.656313370855326	8651.49	0.208002622710843	NA	NA	NA	2	2	2	499593	0.921213344051758	TRUE
IL_1B	Cells_EBV-transformed_lymphocytes	ENSG00000073350.13	LLGL2	470920181274414	636828564623624	2.48689e+07	0.0014735668047431	NA	NA	NA	1	2	2	2.48689e+07	0.0965163992546824	TRUE
IL_1B	Cells_EBV-transformed_lymphocytes	ENSG00000130755.12	GMFG	429291439056396	104979885036064	1.76343e+09	0.000473489626779603	NA	NA	NA	1	1	1	1.76343e+09	0.117235792321282	TRUE
IL_1B	Cells_EBV-transformed_lymphocytes	ENSG00000179134.15	SAMD4B	-429291439056396	-871481136393848	1.76343e+09	0.000687078996196069	NA	NA	NA	1	1	1	1.76343e+09	0.141223940324486	TRUE
IL_1B	Colon_Sigmoid	ENSG00000141295.13	SCRN2	-578525808332705	-107438492200155	724011	0.0678782263641032	NA	NA	NA	2	2	2	499593	0.479438443683335	TRUE
IL_1B	Colon_Transverse	ENSG00000141295.13	SCRN2	-50473023502189	-0.612636838633967	4.48092e+07	0.182256659851492	NA	NA	NA	4	4	4	5.34936e+07	0.662253411492615	TRUE
IL_1B	Colon_Transverse	ENSG00000106615.9	RHEB	456187534332275	142091079450642	5.06987e+08	2.18309e+08	NA	NA	NA	1	1	1	5.06987e+08	0.00692627576484748	TRUE
IL_1B	Esophagus_Gastroesophageal_Junction	ENSG00000141295.13	SCRN2	-548064594544099	-111722523261521	4.23776e+06	0.058948283794277	NA	NA	NA	3	3	3	6.93436e+07	0.482662402871433	TRUE
IL_1B	Esophagus_Mucosa	ENSG00000141295.13	SCRN2	-559940762466393	-0.33828985693562	215086	0.706348504716882	NA	NA	NA	4	4	4	499593	0.770605184010777	TRUE
IL_1B	Esophagus_Muscularis	ENSG00000141295.13	SCRN2	-573155428898815	-102910523375518	995145	0.0758373402945354	NA	NA	NA	3	3	3	499593	0.500084224608454	TRUE
IL_1B	Heart_Left_Ventricle	ENSG00000141295.13	SCRN2	-559324261205426	-104467778429121	2.22868e+06	0.0722594125595131	NA	NA	NA	5	5	5	499593	0.642974088129798	TRUE
IL_1B	Kidney_Cortex	ENSG00000141295.13	SCRN2	-593539142608643	-166323582658408	293145	0.0464546775523191	NA	NA	NA	1	1	1	293145	0.343902524739828	TRUE
IL_1B	Liver	ENSG00000141295.13	SCRN2	-527563367735903	-10509660977128	1.32298e+07	0.0627053994401073	NA	NA	NA	2	2	2	1.94934e+07	0.530539107278992	TRUE
IL_1B	Liver	ENSG00000177303.9	CASKIN2	471455860137939	227355096994166	2.42235e+07	0.0110670678814709	NA	NA	NA	1	1	1	2.42235e+07	0.269942925456274	TRUE
IL_1B	Liver	ENSG00000073350.13	LLGL2	470920181274414	996394142811696	2.48689e+08	0.000577927864963015	NA	NA	NA	1	1	1	2.48689e+07	0.0616868339134907	TRUE
IL_1B	Liver	ENSG00000179134.15	SAMD4B	-429291439056396	-945802688478035	1.76343e+09	0.000464894471815382	NA	NA	NA	1	1	1	1.76343e+09	0.130126506827812	TRUE
IL_1B	Liver	ENSG00000130755.12	GMFG	429291439056396	15686885234918	1.76343e+09	0.000168998181616449	NA	NA	NA	1	1	1	1.76343e+09	0.078456620391437	TRUE
IL_1B	Lung	ENSG00000141295.13	SCRN2	-547241103154309	-0.994578627683498	443954	0.0889841230860247	NA	NA	NA	3	3	3	5.34936e+07	0.574054986907925	TRUE
IL_1B	Lung	ENSG00000006025.11	OSBPL7	-527458941559038	-606140617820468	1.33054e+06	0.00226612102876344	NA	NA	NA	2	2	2	1.9331e+06	0.0964467877445611	TRUE
IL_1B	Lung	ENSG00000182173.12	TSEN54	-471455860137939	-337991119627357	2.42235e+07	0.00501009396777757	NA	NA	NA	1	2	2	2.42235e+07	0.181581397959997	TRUE
IL_1B	Minor_Salivary_Gland	ENSG00000141295.13	SCRN2	-584730768203735	-102616976375114	499593	0.0886512254615909	NA	NA	NA	1	1	1	499593	0.536676307813684	TRUE
IL_1B	Minor_Salivary_Gland	ENSG00000182173.12	TSEN54	-455303273180092	-192422557050784	5.2878e+08	0.016093668405711	NA	NA	NA	2	3	3	2.42235e+07	0.299717198646546	TRUE
IL_1B	Minor_Salivary_Gland	ENSG00000128011.4	LRFN1	-430557584762573	-124399044919307	1.66552e+09	2.55607e+08	NA	NA	NA	1	1	1	1.66552e+09	0.00994388663355412	TRUE
IL_1B	Minor_Salivary_Gland	ENSG00000130755.12	GMFG	429291439056396	164838247431213	1.76343e+09	0.000190408370442609	NA	NA	NA	1	1	1	1.76343e+09	0.0746634970451012	TRUE
IL_1B	Minor_Salivary_Gland	ENSG00000179134.15	SAMD4B	-429291439056396	-772124838402291	1.76343e+09	0.000867814627691657	NA	NA	NA	1	1	1	1.76343e+09	0.159396504138721	TRUE
IL_1B	Muscle_Skeletal	ENSG00000189120.4	SP6	571677446365356	553243501529903	1.08565e+06	0.002804249427532	NA	NA	NA	1	1	1	1.08565e+06	0.100187710920639	TRUE
IL_1B	Muscle_Skeletal	ENSG00000141295.13	SCRN2	-474950793258562	-0.581845770388375	2.03912e+08	0.164372335308714	NA	NA	NA	4	4	4	499593	0.612224750987602	TRUE
IL_1B	Nerve_Tibial	ENSG00000189120.4	SP6	571677446365356	370527030463317	1.08565e+06	0.00623022572961019	NA	NA	NA	1	1	1	1.08565e+06	0.149592864873289	TRUE
IL_1B	Nerve_Tibial	ENSG00000141295.13	SCRN2	-56970031062676	-0.454193987618861	1.21932e+06	0.404819474674013	NA	NA	NA	3	3	3	499593	0.696538054740808	TRUE
IL_1B	Ovary	ENSG00000189120.4	SP6	571677446365356	105585029166245	1.08565e+06	0.000796612973499228	NA	NA	NA	1	1	1	1.08565e+06	0.052496268114609	TRUE
IL_1B	Ovary	ENSG00000141295.13	SCRN2	-522089128840549	-11674661280629	1.78064e+07	0.0526358288481414	NA	NA	NA	2	2	2	1.94934e+07	0.462979162384441	TRUE
IL_1B	Ovary	ENSG00000128011.4	LRFN1	-430557584762573	-438975770706989	1.66552e+09	1.14244e+08	NA	NA	NA	1	1	1	1.66552e+09	0.0281794596090746	TRUE
IL_1B	Ovary	ENSG00000130755.12	GMFG	429291439056396	122011979151489	1.76343e+09	0.000146385121738997	NA	NA	NA	1	1	1	1.76343e+09	0.100870423425549	TRUE
IL_1B	Ovary	ENSG00000179134.15	SAMD4B	-429291439056396	-640486484418028	1.76343e+09	0.000531229204625248	NA	NA	NA	1	1	1	1.76343e+09	0.192157060288056	TRUE
IL_1B	Pancreas	ENSG00000141295.13	SCRN2	-455389608658637	-0.479609818738529	5.26614e+08	0.257766396451302	NA	NA	NA	2	2	2	1.14087e+08	0.776950257009631	TRUE
IL_1B	Pancreas	ENSG00000182173.12	TSEN54	-454458158366108	-144443342992544	5.50445e+08	0.028047356217135	NA	NA	NA	2	2	2	5.44626e+08	0.40246657250834	TRUE
IL_1B	Pituitary	ENSG00000141295.13	SCRN2	-555421276867812	-0.575322449410195	2.78866e+06	0.253125415415039	NA	NA	NA	3	3	3	499593	0.453348503644207	TRUE
IL_1B	Prostate	ENSG00000141295.13	SCRN2	-584730768203735	-134579856505165	499593	0.0434216155558706	NA	NA	NA	1	1	1	499593	0.409215029872515	TRUE
IL_1B	Skin_Not_Sun_Exposed_Suprapubic	ENSG00000141295.13	SCRN2	-564366737970835	-0.358307850108953	1.66466e+06	0.55845578068408	NA	NA	NA	4	4	4	499593	0.815572355643702	TRUE
IL_1B	Skin_Sun_Exposed_Lower_leg	ENSG00000141295.13	SCRN2	-549853288677917	-0.368520472325658	3.82964e+06	0.547544945522026	NA	NA	NA	4	4	4	499593	0.728681657705541	TRUE
IL_1B	Skin_Sun_Exposed_Lower_leg	ENSG00000177303.9	CASKIN2	471455860137939	362683042251419	2.42235e+07	0.00384538663438877	NA	NA	NA	1	1	1	2.42235e+07	0.169219105528113	TRUE
IL_1B	Small_Intestine_Terminal_Ileum	ENSG00000141295.13	SCRN2	-531535725232958	-102500533212028	1.06448e+07	0.0600255756679664	NA	NA	NA	2	2	2	1.9331e+06	0.54855456215056	TRUE
IL_1B	Small_Intestine_Terminal_Ileum	ENSG00000182173.12	TSEN54	-471025991439819	-463654695692821	2.47401e+08	0.00345039989693806	NA	NA	NA	1	2	2	2.47401e+08	0.132254456969041	TRUE
IL_1B	Spleen	ENSG00000141295.13	SCRN2	-476531271579404	-0.68220381042475	1.88561e+08	0.112089967591203	NA	NA	NA	3	3	3	1.14087e+08	0.597918600847149	TRUE
IL_1B	Stomach	ENSG00000141295.13	SCRN2	-564056772729367	-0.941451939678392	169490	0.0901940483013435	NA	NA	NA	3	3	3	1.94934e+07	0.633655586586779	TRUE
IL_1B	Stomach	ENSG00000182173.12	TSEN54	-471025991439819	-411996049830345	2.47401e+08	0.00374330176891106	NA	NA	NA	1	2	2	2.47401e+08	0.14883734935141	TRUE
IL_1B	Stomach	ENSG00000112561.17	TFEB	-449589157104492	-526100122967319	6.9279e+07	0.001429220016172	NA	NA	NA	1	1	1	6.9279e+07	0.0533930686835155	TRUE
IL_1B	Testis	ENSG00000141294.9	LRRC46	-584730768203735	-380461788137567	499593	0.00557133228619543	NA	NA	NA	1	1	1	499593	0.144750673305691	TRUE
IL_1B	Testis	ENSG00000141295.13	SCRN2	-466696775518579	-0.825394368794384	3.05677e+08	0.0738741530367402	NA	NA	NA	3	3	3	499593	0.510504695429944	TRUE
IL_1B	Thyroid	ENSG00000141295.13	SCRN2	-511276379075724	-101608918582861	3.17479e+06	0.0660848988691746	NA	NA	NA	4	4	4	1.94934e+07	0.382120055746982	TRUE
IL_1B	Uterus	ENSG00000141295.13	SCRN2	-584730768203735	-109347751880195	499593	0.0736677675504814	NA	NA	NA	1	1	1	499593	0.503641812959618	TRUE
IL_1B	Uterus	ENSG00000177303.9	CASKIN2	471455860137939	38498246535042	2.42235e+07	0.00438727074411338	NA	NA	NA	1	1	1	2.42235e+07	0.159417390462542	TRUE
IL_1B	Vagina	ENSG00000141295.13	SCRN2	-486564016342163	-0.913282115672019	1.14087e+08	0.102428567368809	NA	NA	NA	1	1	1	1.14087e+08	0.582148703972797	TRUE
IL_1B	Whole_Blood	ENSG00000141295.13	SCRN2	-574741315601232	-0.944240736255915	906191	0.0938923234181257	NA	NA	NA	4	4	4	499593	0.41406703289753	TRUE
IL_8	Artery_Coronary	ENSG00000075035.9	WSCD2	-538511371612549	-101837133807475	7.23989e+06	1.42284e+09	NA	NA	NA	1	1	1	7.23989e+06	0.013864196165116	TRUE
IL_8	Brain_Amygdala	ENSG00000075035.9	WSCD2	-538511371612549	-527018257298496	7.23989e+06	7.28855e+09	NA	NA	NA	1	1	1	7.23989e+06	0.0267901534804007	TRUE
IL_8	Brain_Hippocampus	ENSG00000075035.9	WSCD2	538511371612549	437157086791742	7.23989e+06	1.02863e+06	NA	NA	NA	1	1	1	7.23989e+06	0.000322970859368137	TRUE
IL_8	Brain_Hypothalamus	ENSG00000075035.9	WSCD2	538511371612549	826902135546173	7.23989e+06	2.7731e+07	NA	NA	NA	1	1	1	7.23989e+06	0.00170744510058308	TRUE
IL_8	Brain_Spinal_cord_cervical_c-1	ENSG00000075035.9	WSCD2	538511371612549	216944237954616	7.23989e+06	3.9932e+08	NA	NA	NA	1	1	1	7.23989e+06	0.00650807789739666	TRUE
IL_8	Brain_Substantia_nigra	ENSG00000075035.9	WSCD2	538511371612549	144204578037192	7.23989e+06	6.30361e+08	NA	NA	NA	1	1	1	7.23989e+06	0.00979088194853185	TRUE
IL_8	Breast_Mammary_Tissue	ENSG00000075035.9	WSCD2	-538511371612549	-209727116040486	7.23989e+06	2.71639e+08	NA	NA	NA	1	1	1	7.23989e+06	0.00673203363807019	TRUE
IL_8	Esophagus_Muscularis	ENSG00000075035.9	WSCD2	-538511371612549	-100779520435758	7.23989e+06	1.06022e+09	NA	NA	NA	1	1	1	7.23989e+06	0.014009691591061	TRUE
IL_8	Pancreas	ENSG00000075035.9	WSCD2	-538511371612549	-300834632631	7.23989e+06	1.20085e+08	NA	NA	NA	1	1	1	7.23989e+06	0.00469324288780211	TRUE
IL_8	Prostate	ENSG00000075035.9	WSCD2	538511371612549	483777026182312	7.23989e+06	5.70969e+07	NA	NA	NA	1	1	1	7.23989e+06	0.00291847260946188	TRUE
IL_8	Skin_Not_Sun_Exposed_Suprapubic	ENSG00000075035.9	WSCD2	538511371612549	657503967111077	7.23989e+06	3.48976e+09	NA	NA	NA	1	1	1	7.23989e+06	0.0214734826042727	TRUE
IL_8	Skin_Sun_Exposed_Lower_leg	ENSG00000075035.9	WSCD2	538511371612549	583487025318862	7.23989e+06	3.36161e+09	NA	NA	NA	1	1	1	7.23989e+06	0.0241974532206339	TRUE
IL_8	Spleen	ENSG00000075035.9	WSCD2	538511371612549	23092296611475	7.23989e+06	0.000253189608457456	NA	NA	NA	1	1	1	7.23989e+06	0.0611411685790666	TRUE
IL_8	Testis	ENSG00000075035.9	WSCD2	538511371612549	376352460005398	7.23989e+06	9.178e+09	NA	NA	NA	1	1	1	7.23989e+06	0.0375150995420556	TRUE
IL_8	Uterus	ENSG00000075035.9	WSCD2	-538511371612549	-444940728261797	7.23989e+06	9.41052e+08	NA	NA	NA	1	1	1	7.23989e+06	0.0317320917218723	TRUE
VEGF	Whole_Blood	ENSG00000181577.15	C6orf223	875604343414307	447067971935442	0.000202224	0.00949756054938052	NA	NA	NA	1	3	3	0.000202224	0.138593242839027	TRUE
