# Supplementary material for: Genetic Regulation of Cytokine Response in Patients with Acute Community-Acquired Pneumonia
Source: Genes (Basel). 2022 Jan 6;13(1):111. doi: 10.3390/genes13010111 (PMC8774373; doi:10.3390/genes13010111)
Supplement: Supplementary file 1 [file genes-13-00111-s001.zip › supplementary_table_s5_20211127.xlsx]

## Sheet: Lookup Coding Genes
category	FDRl2_a	SimesP_a	Sig_a	NSig_a
IL1B	0.991242	0.991242	FALSE	0
IL6	0.668989	0.37166	FALSE	0
CXCL8	0.960895	0.854129	FALSE	0
IL10	0.852128	0.662766	FALSE	0
CCL2	0.142863	0.047621	FALSE	0
CCL3	0.0454174	0.0100928	TRUE	1
VEGFA	9.58648e-17	1.06516e-17	TRUE	39
VCAM1	0.444497	0.197554	FALSE	0
ICAM1	0.830752	0.553835	FALSE	0
