# Supplementary figures and images for: Genetic Regulation of Cytokine Response in Patients with Acute Community-Acquired Pneumonia
Source: MDPI journal article supplement (doi:10.3390/genes13010111), 2022-01-06

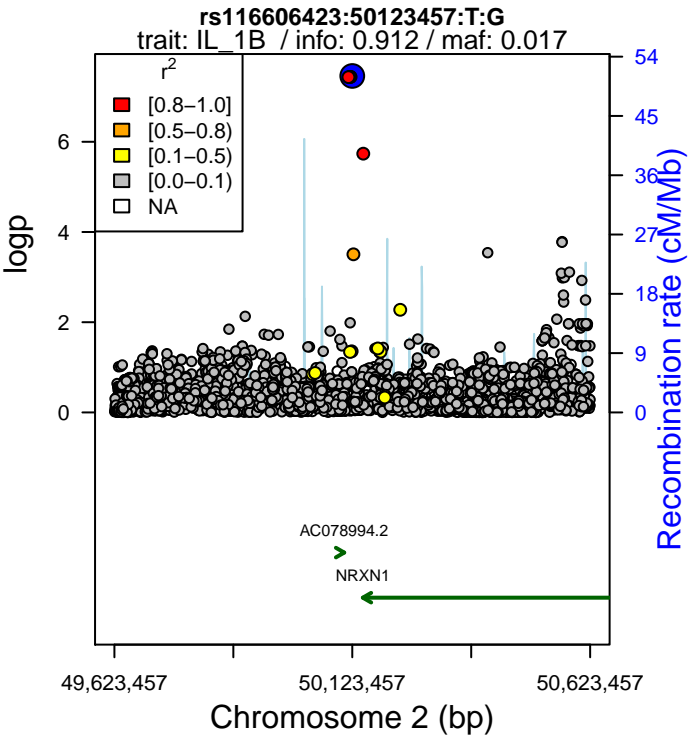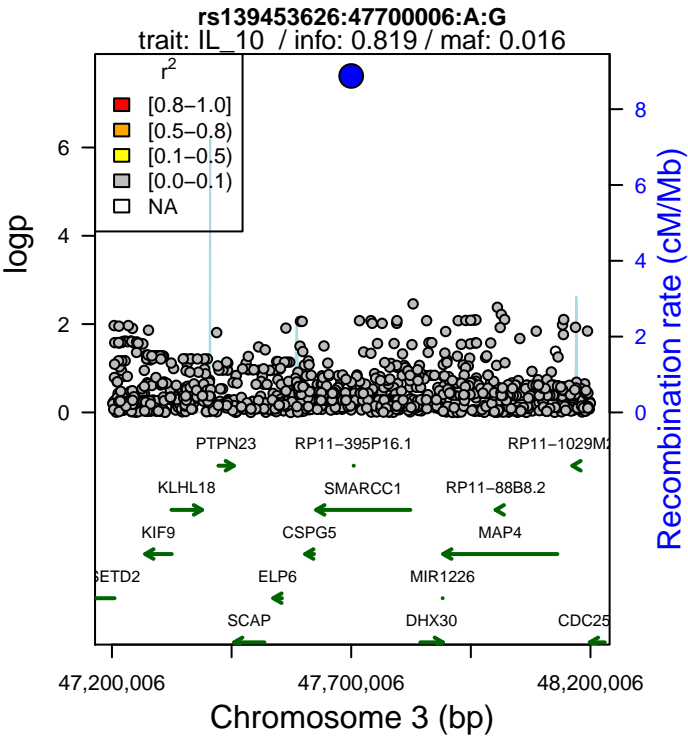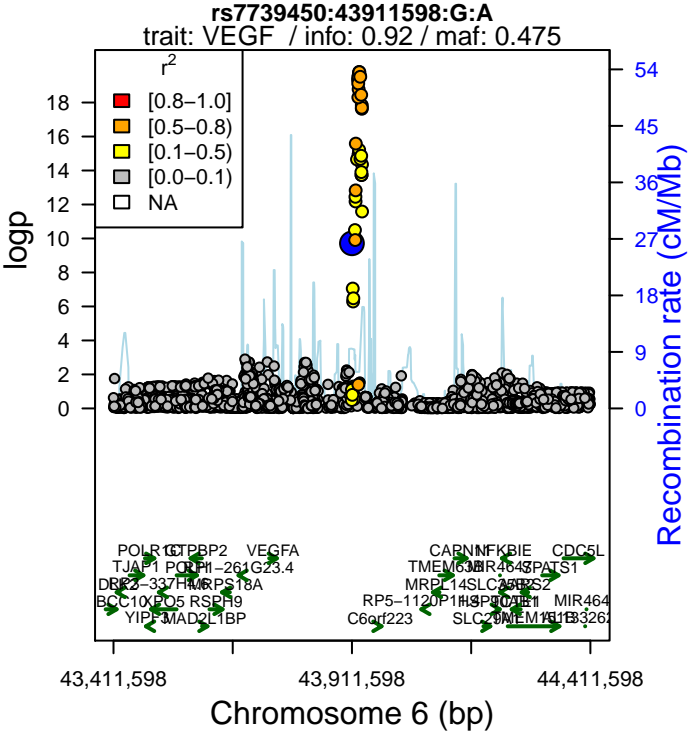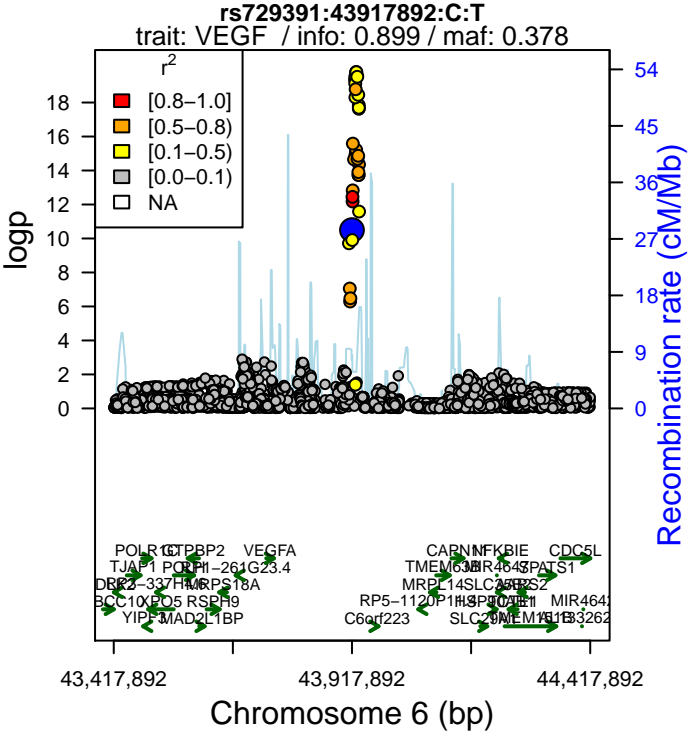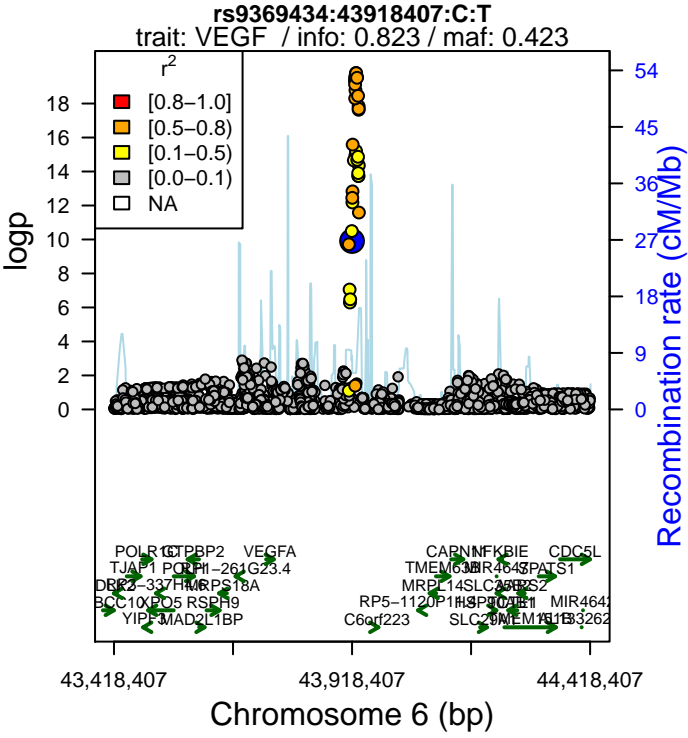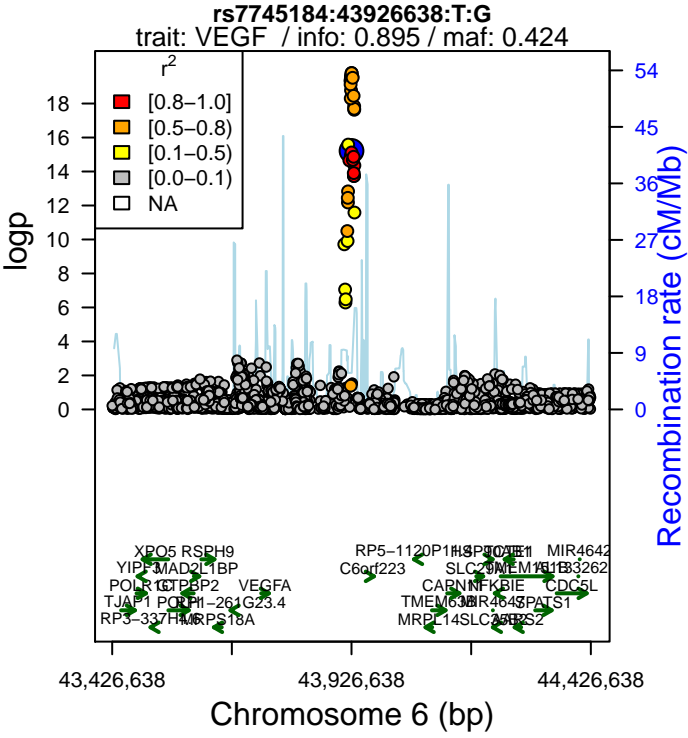

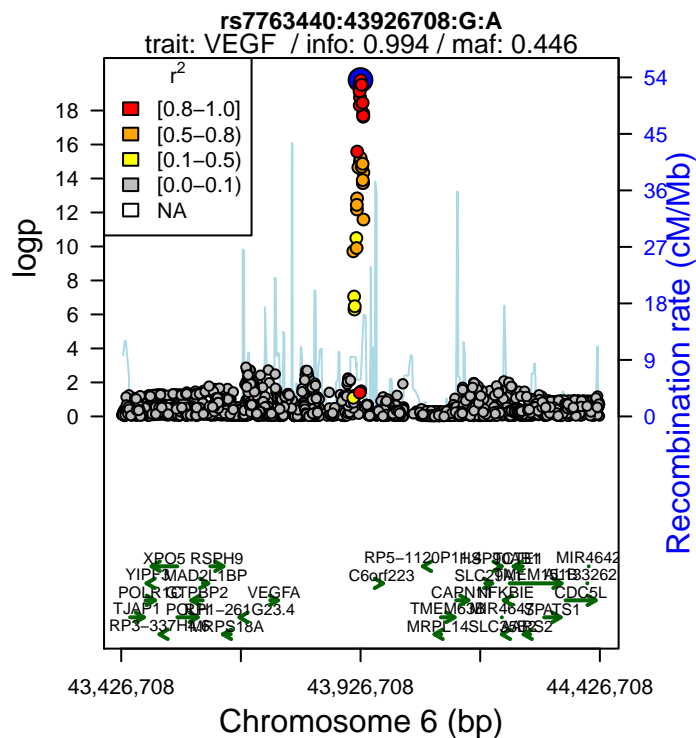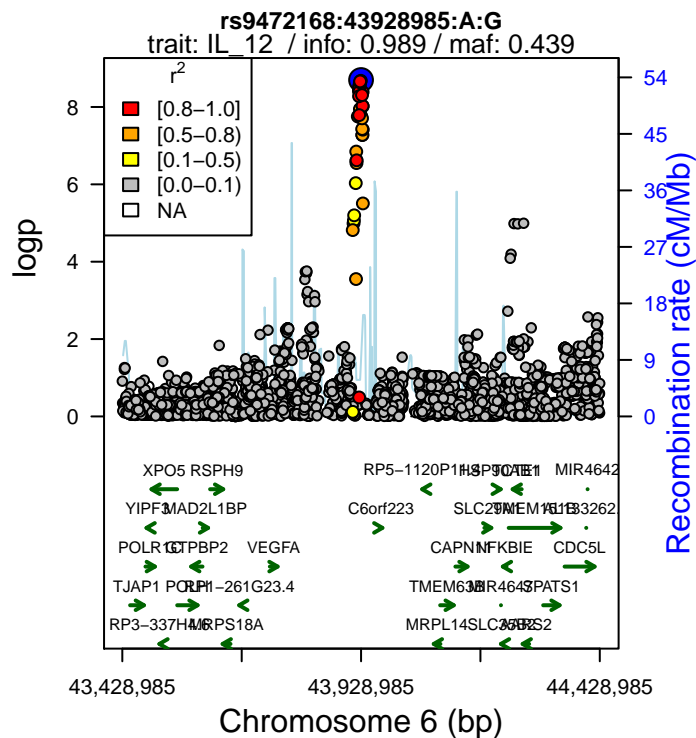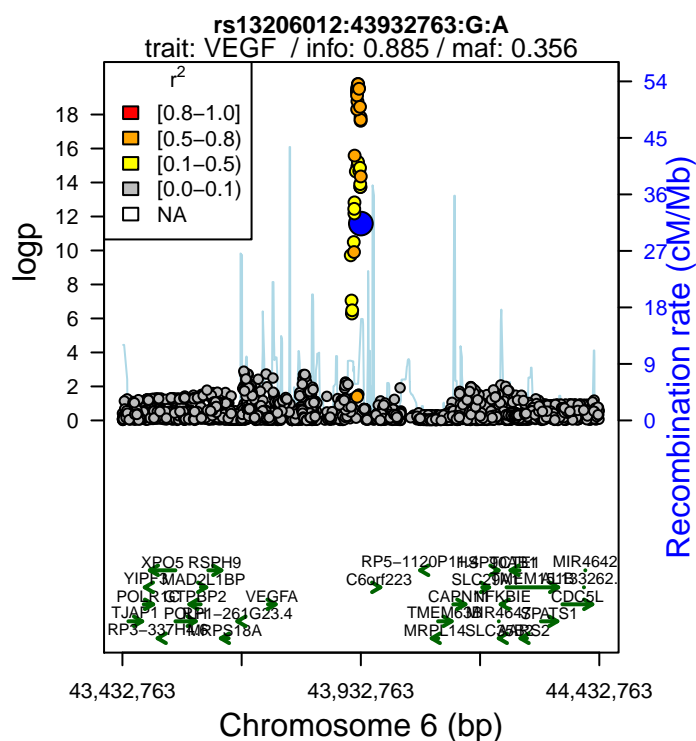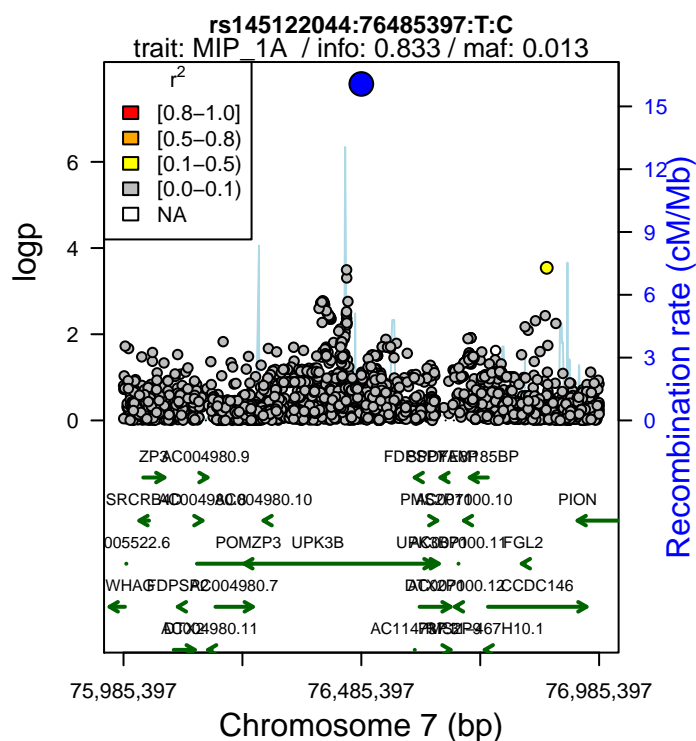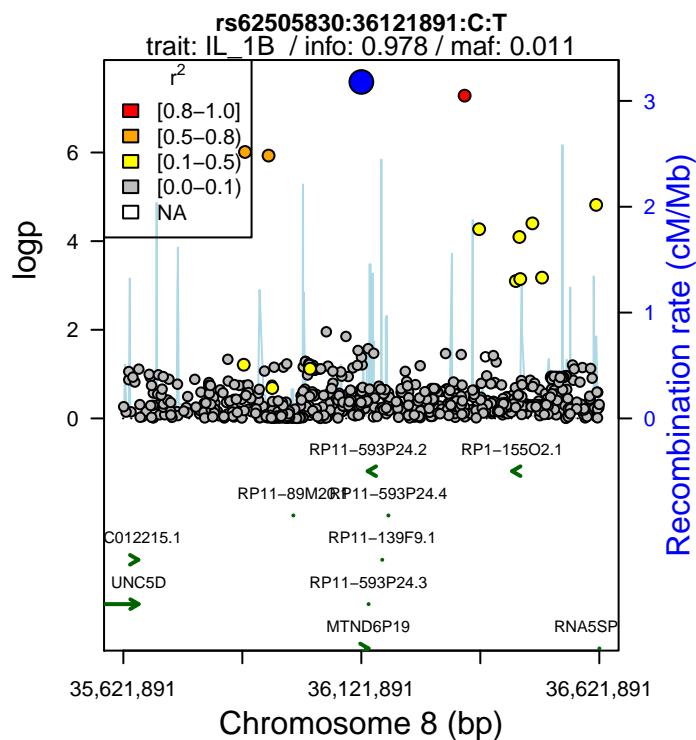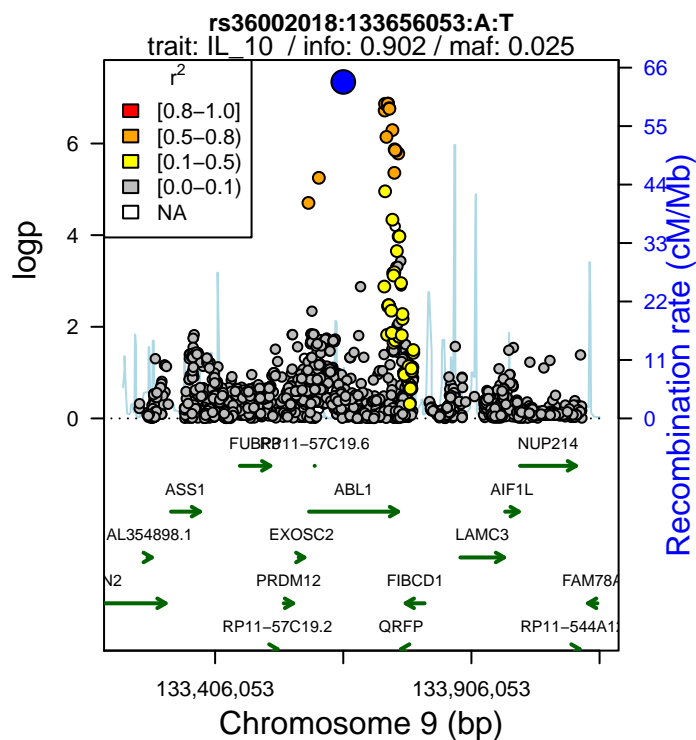

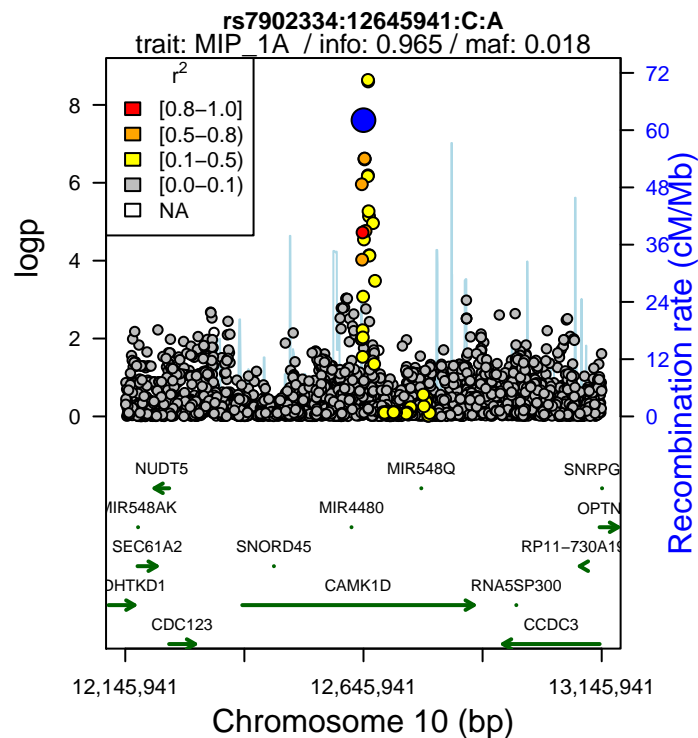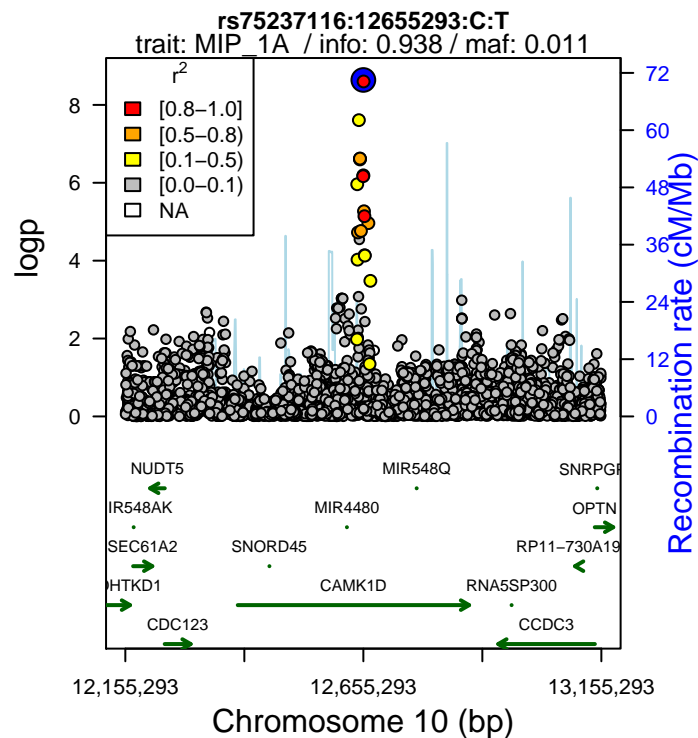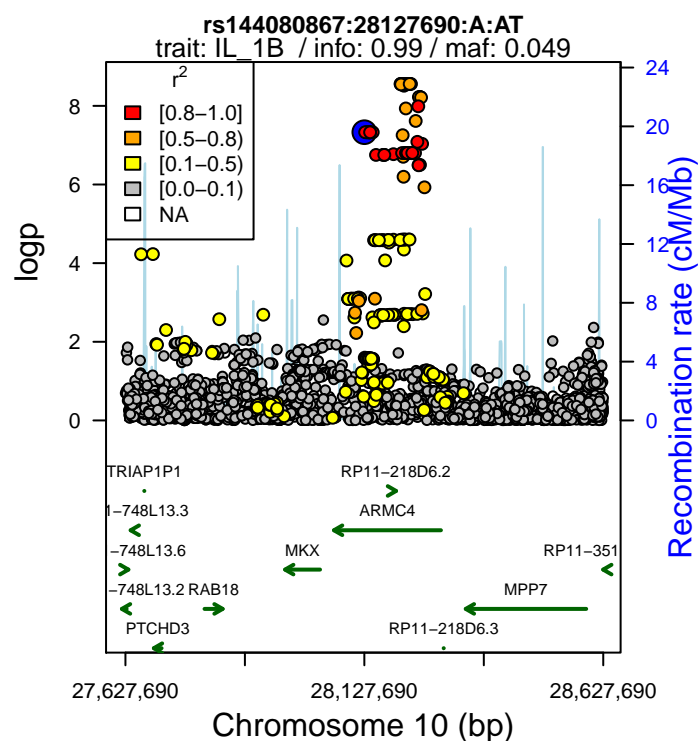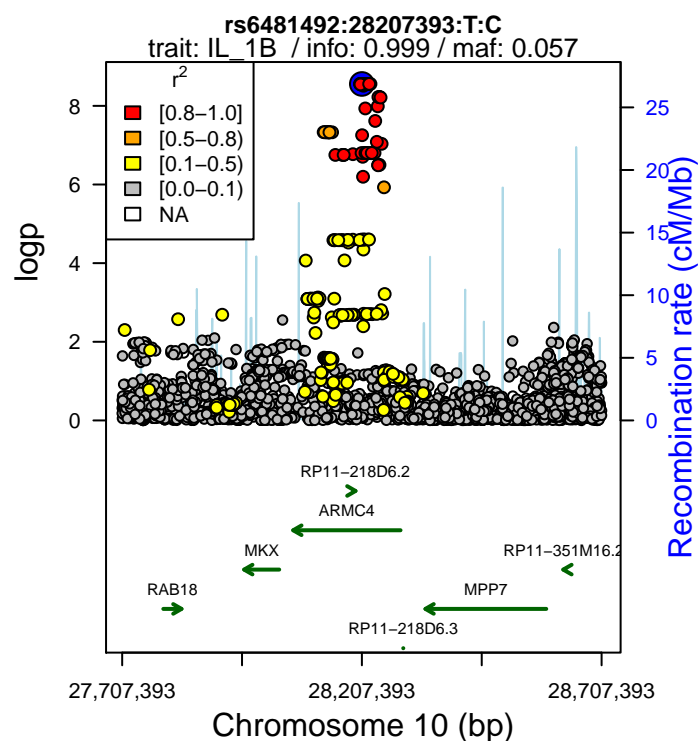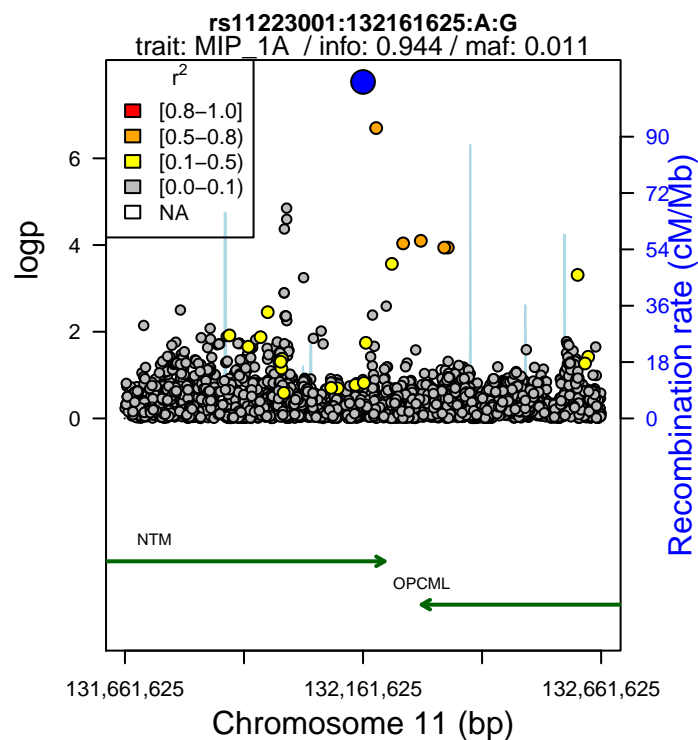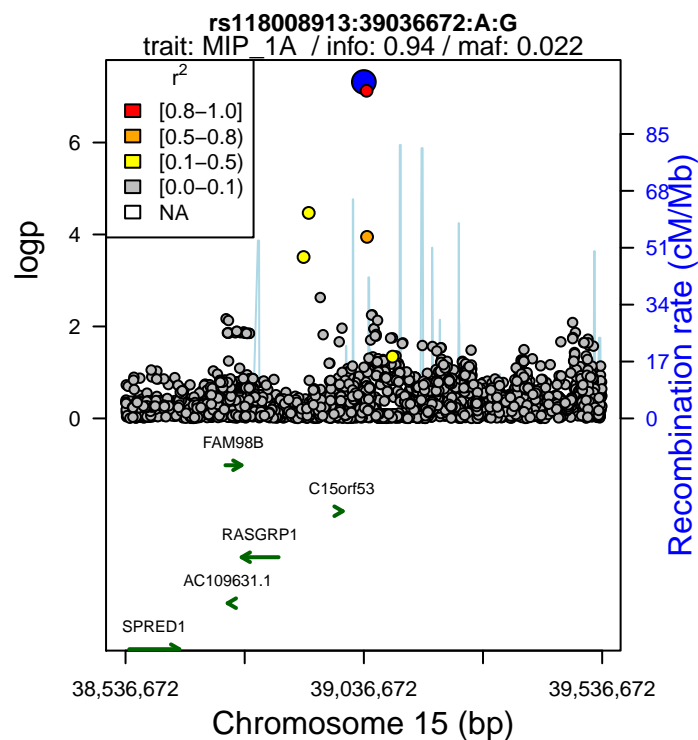

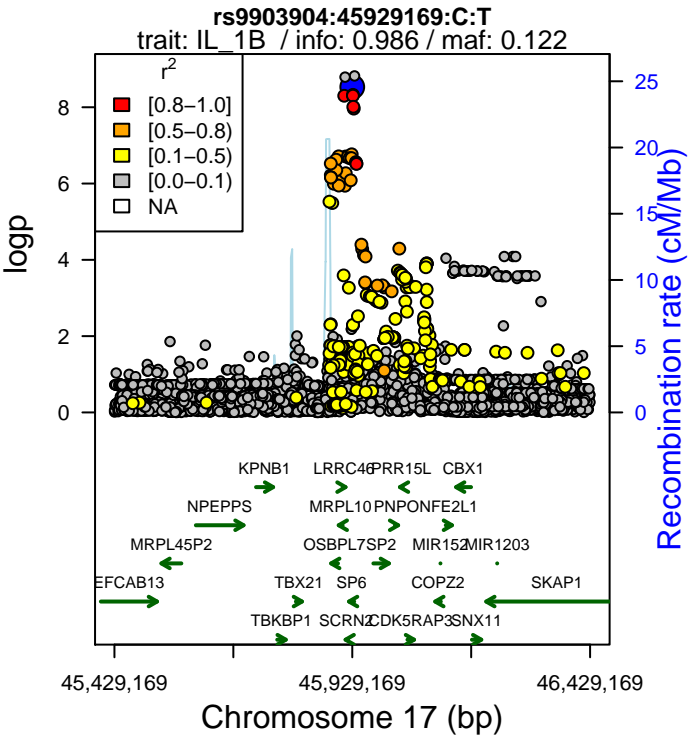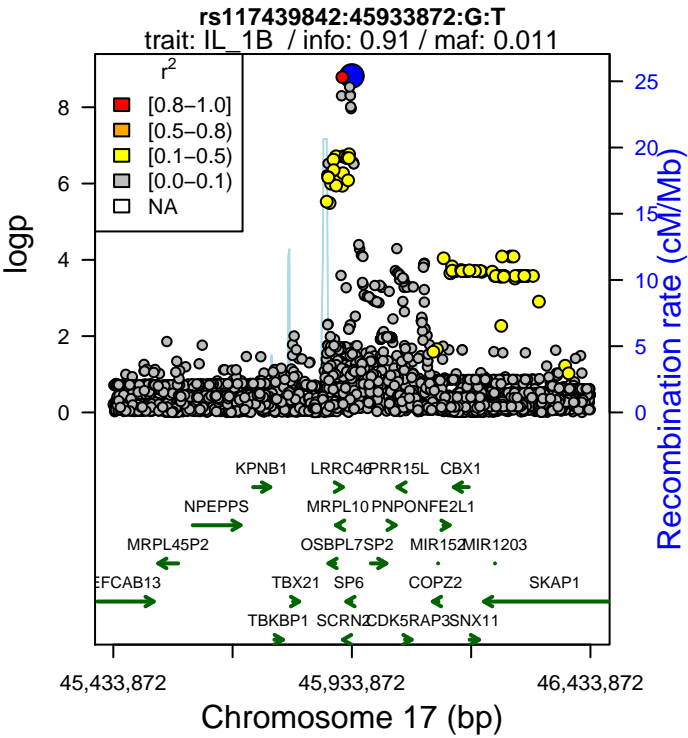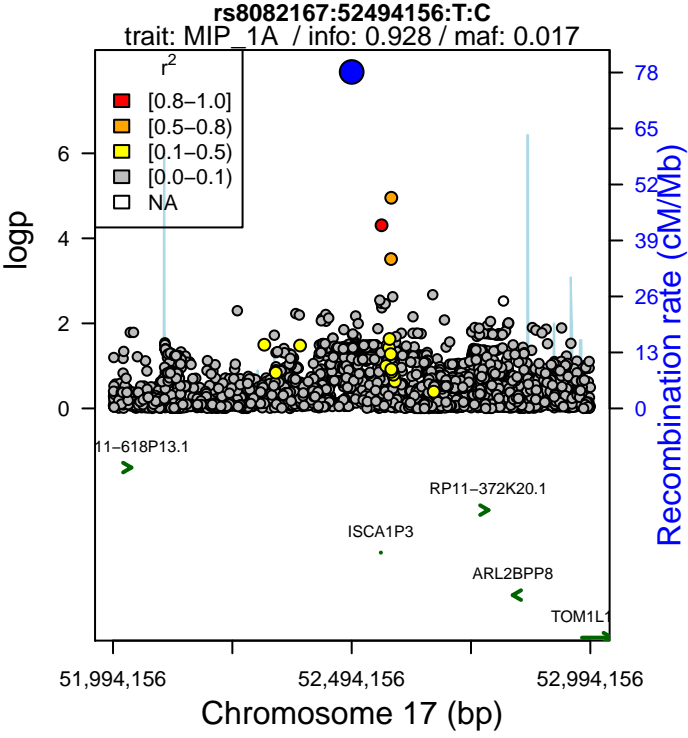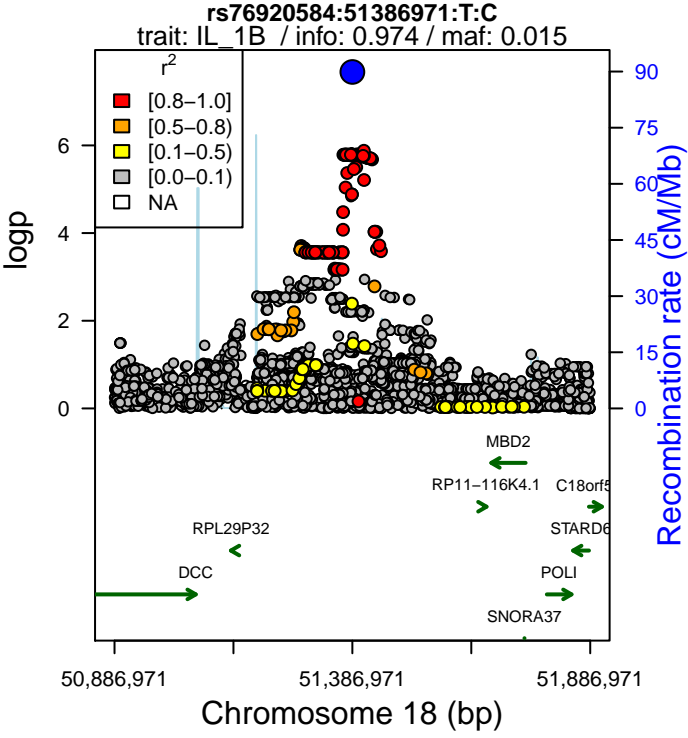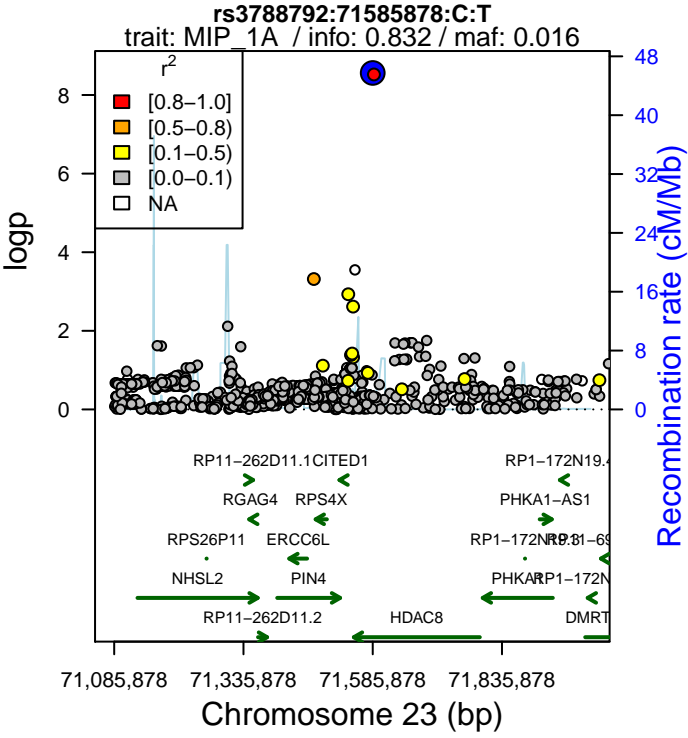

Supplement: s1 [file s1]
